# Supplementary material
Source: Research Square preprint supplement (doi:10.21203/rs.3.rs-8962384/v1)
Supplement: Supplementary file 1 [file 3a6fec4e70a9c096b9a90f26.xlsx]

## Sheet: Traf6+2 h-VS-Traf6-2
Pathway ID	Pathway	Level1	Level2	DEGs with pathway annotation (345)	All genes with pathway annotation (8727)	Pvalue	Qvalue	GeneNumber(Up)	GeneNumber(Down)	PathwayLink
ko05222	Small cell lung cancer	Human Diseases	Cancers: Specific types	10(2.90%)	100(1.15%)	0.00190658	0.0365272	9	1	http://www.kegg.jp/kegg-bin/show_pathway?scale=1.0&query=&map=ko05222&use=reference&multi_query=K02161+red%0D%0AK05717+red%0D%0AK00922+red%0D%0AK04503+red%0D%0AK06237+red%0D%0AK06485+red%0D%0AK11987+blue%0D%0AK04402+red%0D%0AK06240+red%0D%0A
ko05206	MicroRNAs in cancer	Human Diseases	Cancers: Overview	18(5.22%)	142(1.63%)	2.87036e-06	0.000872589	14	4	http://www.kegg.jp/kegg-bin/show_pathway?scale=1.0&query=&map=ko05206&use=reference&multi_query=K02599+red%0D%0AK02161+red%0D%0AK15379+red%0D%0AK04503+red%0D%0AK05866+red%0D%0AK08270+red%0D%0AK06484+red%0D%0AK06252+red%0D%0AK10577+blue%0D%0AK05867+red%0D%0AK17387+red%0D%0AK05089+red%0D%0AK11987+blue%0D%0AK17461+blue%0D%0AK04361+red%0D%0AK00510+blue%0D%0AK07606+red%0D%0AK10145+red%0D%0A
ko05200	Pathways in cancer	Human Diseases	Cancers: Overview	40(11.59%)	523(5.99%)	1.76092e-05	0.0013383	28	12	http://www.kegg.jp/kegg-bin/show_pathway?scale=1.0&query=&map=ko05200&use=reference&multi_query=K02599+red%0D%0AK02161+red%0D%0AK05717+red%0D%0AK05858+red%0D%0AK05449+red%0D%0AK04462+red%0D%0AK00922+red%0D%0AK04503+red%0D%0AK04375+red%0D%0AK04500+red%0D%0AK04737+blue%0D%0AK06237+red%0D%0AK05074+red%0D%0AK00799+red%0D%0AK04389+red%0D%0AK04448+blue%0D%0AK05461+blue%0D%0AK01398+blue%0D%0AK00408+blue…
ko05146	Amoebiasis	Human Diseases	Infectious diseases: Parasitic	11(3.19%)	122(1.40%)	0.00313029	0.0453146	11	0	http://www.kegg.jp/kegg-bin/show_pathway?scale=1.0&query=&map=ko05146&use=reference&multi_query=K05717+red%0D%0AK05858+red%0D%0AK00922+red%0D%0AK13963+red%0D%0AK06237+red%0D%0AK03999+red%0D%0AK06240+red%0D%0A
ko00513	Various types of N-glycan biosynthesis	Metabolism	Glycan biosynthesis and metabolism	5(1.45%)	34(0.39%)	0.00192248	0.0365272	4	1	http://www.kegg.jp/kegg-bin/show_pathway?scale=1.0&query=&map=ko00513&use=reference&multi_query=K09656+red%0D%0AK07432+green%0D%0AK01231+red%0D%0AK01230+red%0D%0A
ko05205	Proteoglycans in cancer	Human Diseases	Cancers: Overview	20(5.80%)	198(2.27%)	3.4414e-05	0.00174364	15	5	http://www.kegg.jp/kegg-bin/show_pathway?scale=1.0&query=&map=ko05205&use=reference&multi_query=K05717+red%0D%0AK01365+blue%0D%0AK00922+red%0D%0AK05098+red%0D%0AK04503+red%0D%0AK04375+red%0D%0AK08122+blue%0D%0AK06278+red%0D%0AK04389+red%0D%0AK01398+blue%0D%0AK00408+blue%0D%0AK06484+red%0D%0AK08107+red%0D%0AK02354+red%0D%0AK02235+red%0D%0AK04515+red%0D%0AK04361+red%0D%0AK10164+red%0D%0AK01384+blue…
ko00730	Thiamine metabolism	Metabolism	Metabolism of cofactors and vitamins	3(0.87%)	16(0.18%)	0.0029937	0.0453146	2	1	http://www.kegg.jp/kegg-bin/show_pathway?scale=1.0&query=&map=ko00730&use=reference&multi_query=K01077+red%0D%0AK14394+blue%0D%0AK00939+red%0D%0A
ko00261	Monobactam biosynthesis	Metabolism	Biosynthesis of other secondary metabolites	1(0.29%)	2(0.02%)	0.00155847	0.0364441	1	0	http://www.kegg.jp/kegg-bin/show_pathway?scale=1.0&query=&map=ko00261&use=reference&multi_query=K13811+red%0D%0A
ko04914	Progesterone-mediated oocyte maturation	Organismal Systems	Endocrine system	10(2.90%)	96(1.10%)	0.00136598	0.0346048	7	3	http://www.kegg.jp/kegg-bin/show_pathway?scale=1.0&query=&map=ko04914&use=reference&multi_query=K04373+red%0D%0AK21770+red%0D%0AK00922+red%0D%0AK03357+blue%0D%0AK08694+blue%0D%0AK05866+red%0D%0AK05868+red%0D%0AK05867+red%0D%0AK08046+red%0D%0A
ko04933	AGE-RAGE signaling pathway in diabetic complications	Human Diseases	Endocrine and metabolic diseases	12(3.48%)	87(1.00%)	3.32521e-05	0.00174364	10	2	http://www.kegg.jp/kegg-bin/show_pathway?scale=1.0&query=&map=ko04933&use=reference&multi_query=K02161+red%0D%0AK05717+red%0D%0AK05858+red%0D%0AK05449+red%0D%0AK00922+red%0D%0AK04503+red%0D%0AK04500+red%0D%0AK06237+red%0D%0AK04448+blue%0D%0AK01398+blue%0D%0AK03907+red%0D%0A
ko04974	Protein digestion and absorption	Organismal Systems	Digestive system	10(2.90%)	81(0.93%)	0.000318288	0.00967596	9	1	http://www.kegg.jp/kegg-bin/show_pathway?scale=1.0&query=&map=ko04974&use=reference&multi_query=K01285+red%0D%0AK19721+red%0D%0AK05849+red%0D%0AK01298+blue%0D%0AK06237+red%0D%0AK01539+red%0D%0AK16628+red%0D%0AK06238+red%0D%0A
ko04630	Jak-STAT signaling pathway	Environmental Information Processing	Signal transduction	13(3.77%)	154(1.76%)	0.00306598	0.0453146	9	4	http://www.kegg.jp/kegg-bin/show_pathway?scale=1.0&query=&map=ko04630&use=reference&multi_query=K02161+red%0D%0AK00922+red%0D%0AK04503+red%0D%0AK04737+blue%0D%0AK05081+red%0D%0AK05074+red%0D%0AK05080+red%0D%0AK11221+red%0D%0AK05417+blue%0D%0AK05089+red%0D%0AK04738+blue%0D%0AK04361+red%0D%0AK04701+blue%0D%0A
ko05225	Hepatocellular carcinoma	Human Diseases	Cancers: Specific types	14(4.06%)	162(1.86%)	0.0018438	0.0365272	11	3	http://www.kegg.jp/kegg-bin/show_pathway?scale=1.0&query=&map=ko05225&use=reference&multi_query=K00922+red%0D%0AK04503+red%0D%0AK04375+red%0D%0AK04500+red%0D%0AK11649+red%0D%0AK00799+red%0D%0AK00408+blue%0D%0AK02354+red%0D%0AK02235+red%0D%0AK02353+red%0D%0AK04361+red%0D%0AK04402+red%0D%0AK00510+blue%0D%0AK01384+blue%0D%0A
ko04926	Relaxin signaling pathway	Organismal Systems	Endocrine system	12(3.48%)	124(1.42%)	0.00119529	0.0330335	9	3	http://www.kegg.jp/kegg-bin/show_pathway?scale=1.0&query=&map=ko04926&use=reference&multi_query=K05858+red%0D%0AK05449+red%0D%0AK00922+red%0D%0AK04500+red%0D%0AK06237+red%0D%0AK04448+blue%0D%0AK01398+blue%0D%0AK04540+red%0D%0AK08046+red%0D%0AK04544+blue%0D%0AK04361+red%0D%0A
ko04310	Wnt signaling pathway	Environmental Information Processing	Signal transduction	13(3.77%)	153(1.75%)	0.00288789	0.0453146	9	4	http://www.kegg.jp/kegg-bin/show_pathway?scale=1.0&query=&map=ko04310&use=reference&multi_query=K05858+red%0D%0AK17332+red%0D%0AK04503+red%0D%0AK04511+red%0D%0AK04448+blue%0D%0AK00408+blue%0D%0AK04499+blue%0D%0AK02354+red%0D%0AK02235+red%0D%0AK04515+red%0D%0AK08110+red%0D%0AK02353+red%0D%0AK01384+blue%0D%0A
ko04510	Focal adhesion	Cellular Processes	Cellular community - eukaryotes	20(5.80%)	188(2.15%)	1.56645e-05	0.0013383	18	2	http://www.kegg.jp/kegg-bin/show_pathway?scale=1.0&query=&map=ko04510&use=reference&multi_query=K06587+red%0D%0AK02161+red%0D%0AK05717+red%0D%0AK05449+red%0D%0AK00922+red%0D%0AK05098+red%0D%0AK04503+red%0D%0AK04659+blue%0D%0AK04375+red%0D%0AK06237+red%0D%0AK06278+red%0D%0AK04448+blue%0D%0AK06484+red%0D%0AK06252+red%0D%0AK06485+red%0D%0AK05089+red%0D%0AK04361+red%0D%0AK06240+red%0D%0AK06238+red%0D…
ko01522	Endocrine resistance	Human Diseases	Drug resistance: Antineoplastic	9(2.61%)	88(1.01%)	0.00237698	0.0425061	7	2	http://www.kegg.jp/kegg-bin/show_pathway?scale=1.0&query=&map=ko01522&use=reference&multi_query=K02599+red%0D%0AK02161+red%0D%0AK00922+red%0D%0AK04503+red%0D%0AK04246+red%0D%0AK04448+blue%0D%0AK01398+blue%0D%0AK08046+red%0D%0AK04361+red%0D%0A
ko04512	ECM-receptor interaction	Environmental Information Processing	Signaling molecules and interaction	10(2.90%)	72(0.83%)	0.000109004	0.00368191	9	1	http://www.kegg.jp/kegg-bin/show_pathway?scale=1.0&query=&map=ko04512&use=reference&multi_query=K06587+red%0D%0AK05717+red%0D%0AK04659+blue%0D%0AK06237+red%0D%0AK06484+red%0D%0AK06252+red%0D%0AK06485+red%0D%0AK06240+red%0D%0AK06238+red%0D%0A
ko05224	Breast cancer	Human Diseases	Cancers: Specific types	12(3.48%)	140(1.60%)	0.00354965	0.0490497	8	4	http://www.kegg.jp/kegg-bin/show_pathway?scale=1.0&query=&map=ko05224&use=reference&multi_query=K02599+red%0D%0AK00922+red%0D%0AK04503+red%0D%0AK04448+blue%0D%0AK00408+blue%0D%0AK04358+blue%0D%0AK02354+red%0D%0AK02235+red%0D%0AK02353+red%0D%0AK04361+red%0D%0AK04402+red%0D%0AK01384+blue%0D%0A
ko05166	HTLV-I infection	Human Diseases	Infectious diseases: Viral	24(6.96%)	274(3.14%)	7.98364e-05	0.00346718	17	7	http://www.kegg.jp/kegg-bin/show_pathway?scale=1.0&query=&map=ko05166&use=reference&multi_query=K05856+blue%0D%0AK17332+red%0D%0AK21770+red%0D%0AK00922+red%0D%0AK04503+red%0D%0AK04375+red%0D%0AK05770+red%0D%0AK04500+red%0D%0AK06751+red%0D%0AK05074+red%0D%0AK12496+red%0D%0AK03357+blue%0D%0AK06637+red%0D%0AK04448+blue%0D%0AK00408+blue%0D%0AK08046+red%0D%0AK05089+red%0D%0AK09341+red%0D%0AK02354+red%…
ko05226	Gastric cancer	Human Diseases	Cancers: Specific types	12(3.48%)	141(1.62%)	0.00377453	0.0498895	9	3	http://www.kegg.jp/kegg-bin/show_pathway?scale=1.0&query=&map=ko05226&use=reference&multi_query=K02161+red%0D%0AK00922+red%0D%0AK04503+red%0D%0AK04500+red%0D%0AK00408+blue%0D%0AK04358+blue%0D%0AK02354+red%0D%0AK02235+red%0D%0AK02353+red%0D%0AK04361+red%0D%0AK04402+red%0D%0AK01384+blue%0D%0A
ko05165	Human papillomavirus infection	Human Diseases	Infectious diseases: Viral	29(8.41%)	320(3.67%)	8.96976e-06	0.0013383	22	7	http://www.kegg.jp/kegg-bin/show_pathway?scale=1.0&query=&map=ko05165&use=reference&multi_query=K07205+blue%0D%0AK02599+red%0D%0AK06587+red%0D%0AK05717+red%0D%0AK00922+red%0D%0AK04503+red%0D%0AK04659+blue%0D%0AK03171+blue%0D%0AK06751+red%0D%0AK06237+red%0D%0AK04389+red%0D%0AK06061+red%0D%0AK00408+blue%0D%0AK06484+red%0D%0AK06252+red%0D%0AK06485+red%0D%0AK07211+red%0D%0AK11221+red%0D%0AK05089+red%…
ko04151	PI3K-Akt signaling pathway	Environmental Information Processing	Signal transduction	29(8.41%)	365(4.18%)	0.000108493	0.00368191	22	7	http://www.kegg.jp/kegg-bin/show_pathway?scale=1.0&query=&map=ko04151&use=reference&multi_query=K07205+blue%0D%0AK06587+red%0D%0AK02161+red%0D%0AK05717+red%0D%0AK05449+red%0D%0AK00922+red%0D%0AK05098+red%0D%0AK04503+red%0D%0AK04659+blue%0D%0AK04737+blue%0D%0AK06237+red%0D%0AK05081+red%0D%0AK05080+red%0D%0AK04389+red%0D%0AK08270+red%0D%0AK05461+blue%0D%0AK06484+red%0D%0AK04358+blue%0D%0AK04540+red…
