# Supplementary material
Source: Research Square preprint supplement (doi:10.21203/rs.3.rs-8962384/v1)
Supplement: Supplementary file 1 [file 7f3aa698a4f9ca071e069b6b.docx]

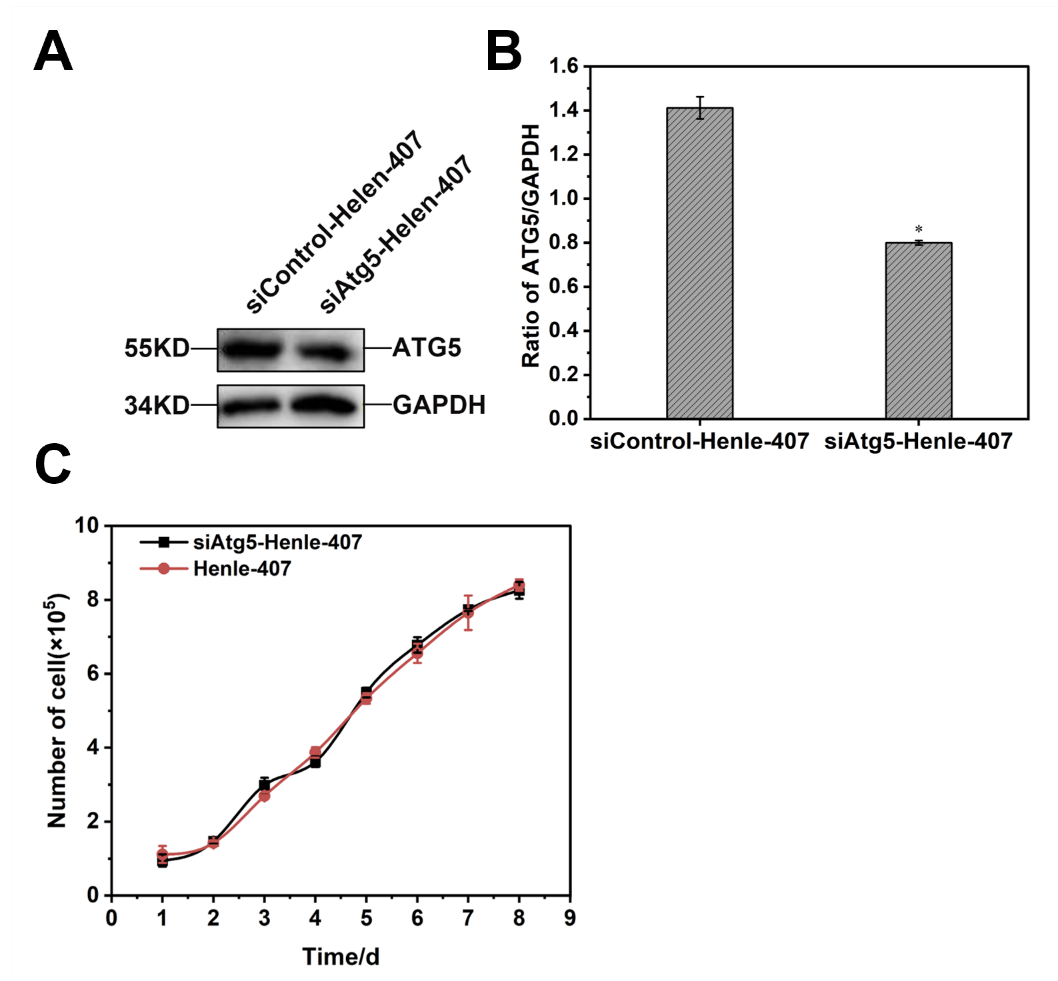


Figure S1. *Atg5* gene was knockdown in the Henle-407 cell.

(A) and (B) Protein level of Atg5 Henle-407 cell(siControl-Henle-407) and si*Atg5*-Henle-407.

* indicates *P*<0.05(Student’s *t*-tests). (C) Cell growth curve of siControl-Henle-407 and si*Atg5*-Henle-407 in 8 hours.


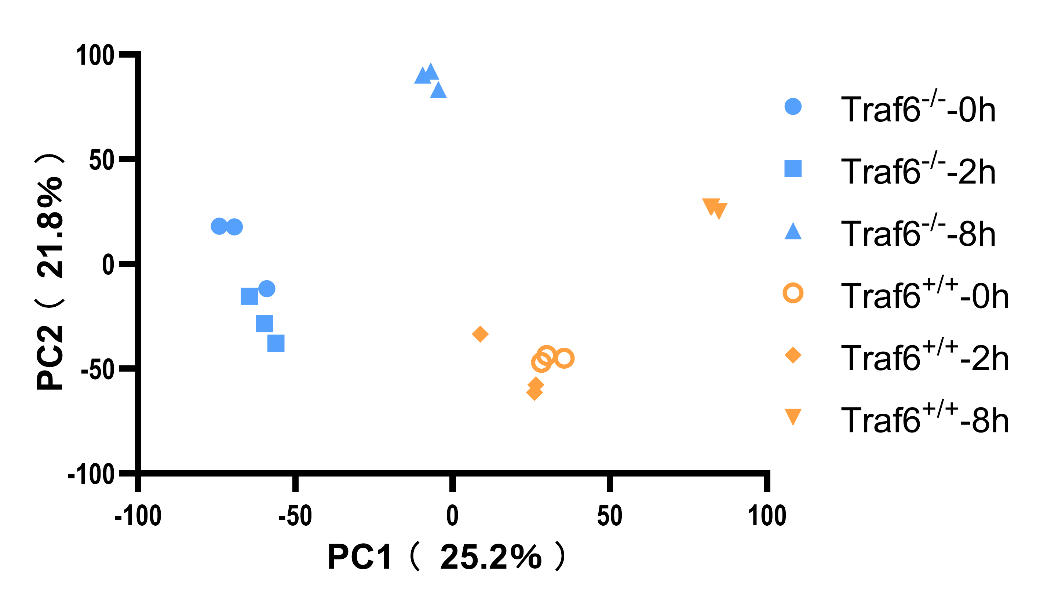


Figure S2. Principal component analysis of transcriptional dynamics in *Traf6+/+* cells and *Traf6-/-* cells during infection.

PCA plot of RNA-seq data from *Traf6+/+* cells and *Traf6-/-* cells at 0, 2, and 8 hours post-infection. PC1 and PC2 account for 25.2% and 21.8% of the total variance, respectively. Symbol shapes denote time points post-infection and colors indicate genotypes (blue, *Traf6-/-* cells; orange, *Traf6+/+* cells). Each data point represents an individual biological replicate.


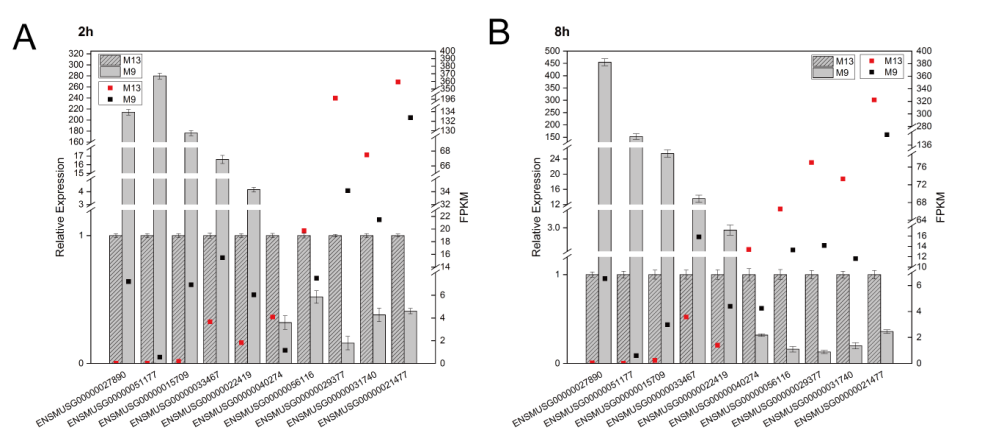


Figure S3. Validation of transcriptional expression of DEGs by RT-qPCR.

(A) Transcriptional expression of DEGs at 2 h after *Salmonella* infection. (B) Transcriptional expression of DEGs at 8 h after *Salmonella* infection. “M13” represents *Traf6+/+* cells infected by *Salmonella.* “M9” represents *Traf6-/-*cells infected by *Salmonella.* The Y-axis on the left shows the relative gene expression levels analyzed by qPCR (gray histogram), while Y-axis on the right shows corresponding expression data of RNA-Seq (black and red dot). The X-axis represents the 10 randomly selected DEGs.


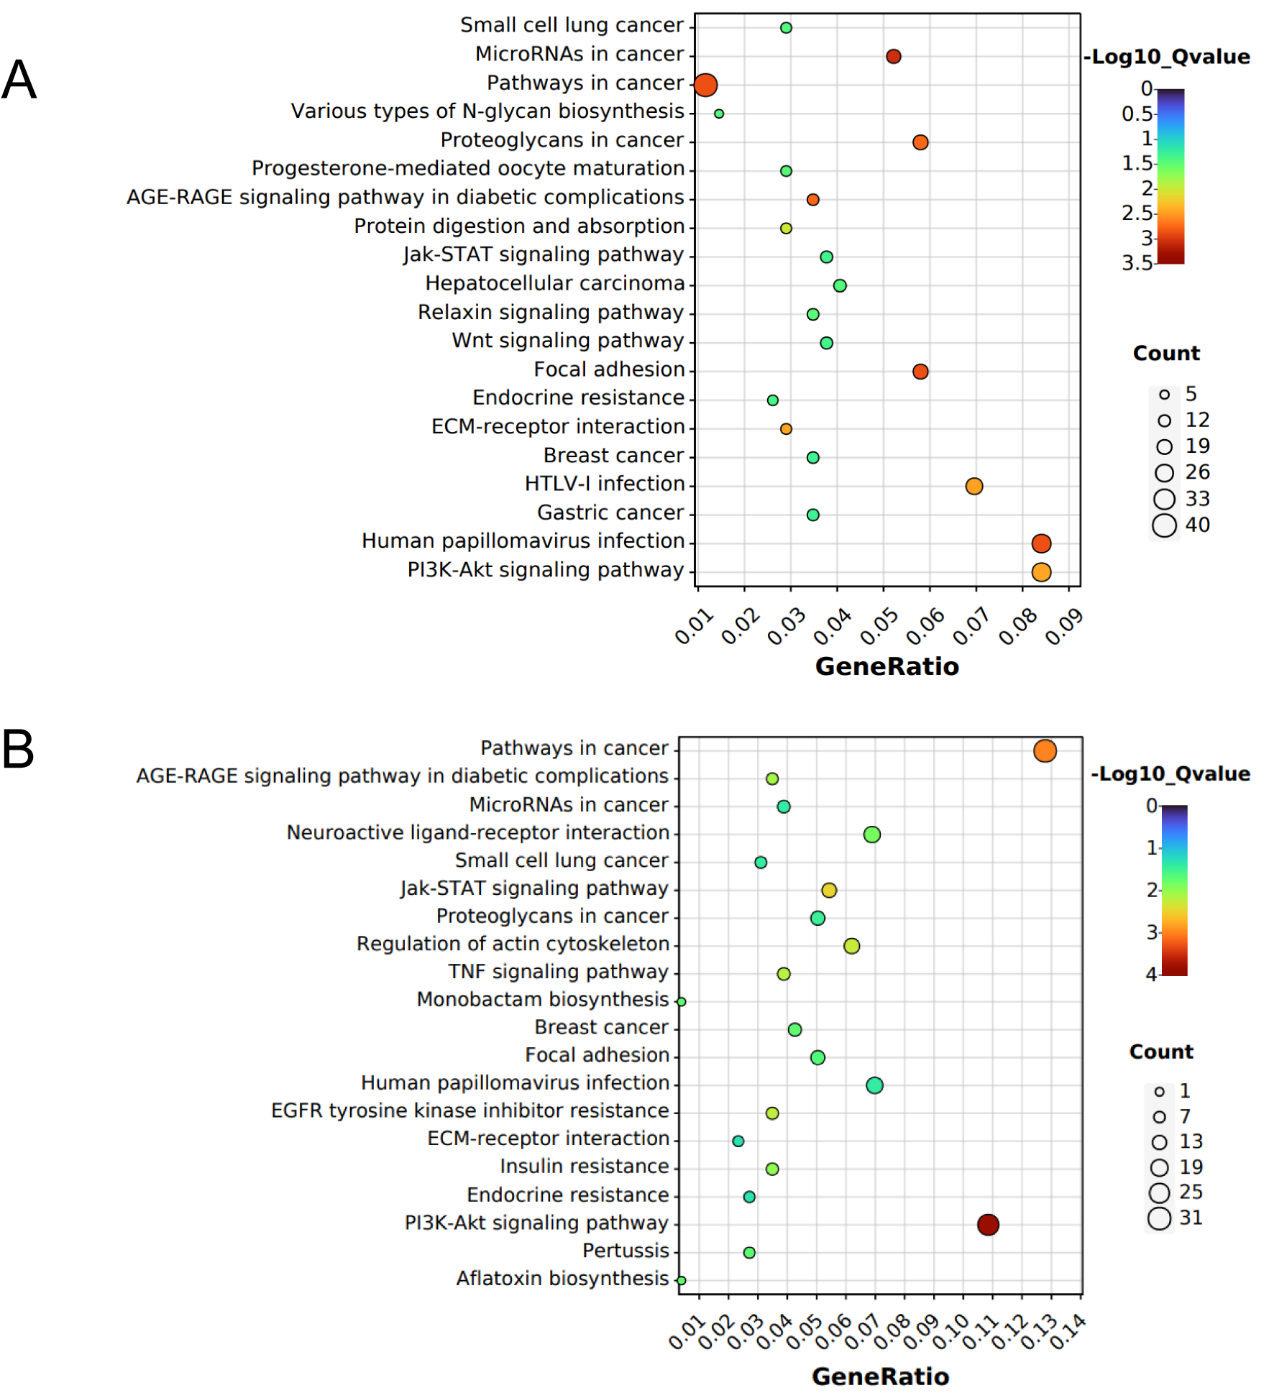


Figure S4 The pathways that displayed significant changes (*p*-value≤0.05) in *Traf6* deletion were identified using the KEGG database.

(A) The pathways that displayed significant changes in 2 h of *Salmonella* infection. (B) The pathways that displayed significant changes in 8 h of *Salmonella* infection. The size of the dot is proportional to the number of genes; the closer the q-value is to “0”.

Table S1 Summary of the quality of filtered sequencing data

| Sample | length | Clean Reads | Bases | Q20(%) | Q30(%) | GC(%) | N(ppm) |
| --- | --- | --- | --- | --- | --- | --- | --- |
| *Traf6+/+*-0A | 148.86 | 50840614 | 7568249138 | 97.01 | 91.99 | 47.88 | 3.41 |
| *Traf6+/+*-0B | 148.94 | 50211826 | 7478377025 | 97.50 | 93.06 | 49.34 | 3.39 |
| *Traf6+/+*-0C | 148.79 | 47664576 | 7092216615 | 96.97 | 91.92 | 47.58 | 3.38 |
| *Traf6+/+*-2A | 148.67 | 51958820 | 7724481333 | 97.44 | 92.95 | 47.79 | 3.42 |
| *Traf6+/+-*2B | 148.82 | 49625412 | 7385156824 | 96.82 | 91.67 | 47.27 | 3.42 |
| *Traf6+/+*-2C | 148.93 | 52019074 | 7747391185 | 96.65 | 91.23 | 48.20 | 3.40 |
| *Traf6+/+*-8A | 148.74 | 39767904 | 5915055800 | 96.78 | 91.62 | 48.55 | 3.49 |
| *Traf6+/+*-8B | 148.73 | 49869410 | 7417312015 | 96.94 | 91.88 | 48.64 | 3.48 |
| *Traf6+/+*-8C | 148.77 | 67530912 | 10046784616 | 97.29 | 92.51 | 48.67 | 2.87 |
| *Traf6-/-*-0A | 148.77 | 52423994 | 7799291712 | 96.97 | 91.91 | 48.16 | 3.47 |
| *Traf6-/-*-0B | 148.39 | 49545788 | 7352050633 | 97.15 | 92.36 | 46.99 | 3.37 |
| *Traf6-/-*-0C | 148.37 | 40325906 | 5983226225 | 96.85 | 91.77 | 47.53 | 3.58 |
| *Traf6-/-*-2A | 148.71 | 47402330 | 7049277777 | 97.28 | 92.61 | 47.45 | 3.49 |
| *Traf6-/-*-2B | 148.78 | 48583048 | 7228318498 | 97.30 | 92.67 | 47.67 | 3.49 |
| *Traf6-/-*-2C | 148.72 | 54963846 | 8174330260 | 97.46 | 92.98 | 48.09 | 3.39 |
| *Traf6-/-*-8A | 148.84 | 41422518 | 6165483874 | 96.88 | 91.78 | 47.57 | 3.65 |
| *Traf6-/-*-8B | 148.80 | 47306412 | 7039243914 | 95.38 | 88.74 | 47.63 | 3.51 |
| *Traf6-/-*-8C | 148.87 | 42995148 | 6400856147 | 96.72 | 91.44 | 47.78 | 3.54 |

Table S2 Real-time PCR primers

| Gene ID | Name of primers | Sequences（5’-3’） |
| --- | --- | --- |
| ENSMUSG00000027890 | *Gstm4*-F | CACAAGATCACGCAGAGCAA |
|  | *Gstm4*-R | AGCCAGCTGATTGGAGACAT |
| ENSMUSG00000051177 | *Plcb1*-F | TTCTGTCTGGATGTCGCTGT |
|  | *Plcb1*-R | GGGGAAAGGAGACGTCTTGA |
| ENSMUSG00000015709 | *Arnt2*-F | GCCGCTGATGGATTTCTGTT |
|  | *Arnt2*-R | GGGTGCACCTGCTCATAAAG |
| ENSMUSG00000033467 | *Crlf2*-F | TGAGAAGCATCACGGGAACT |
|  | *Crlf2-*R | CCTCTTAGCCTTGGTGTGGA |
| ENSMUSG00000040274 | *Cdk6*-F | GACGGACAGAGAAACCAAGC |
|  | *Cdk6*-R | ACCTCGGAGAAGCTGAAACA |
| ENSMUSG00000056116 | *H2-T22*-F | TGGGAAACAGCACTGTACCT |
|  | *H2-T22*-R | GGTCACATGTGCCTTTGGAG |
| ENSMUSG00000029377 | *Ereg*-F | TCCGAGGATAACTGTACCGC |
|  | *Ereg*-R | TAGCCCACTTCACATCTGCA |
| ENSMUSG00000031740 | *Mmp2*-F | GAACACCATCGAGACCATGC |
|  | *Mmp2*-R | ATCATCCACGGTTTCAGGGT |
| ENSMUSG00000021477 | *Ctsl-*F | TGTGACTCCTGTGAAGAACCA |
|  | *Ctsl*-R | ATTGCCTTGAGCGTGAGAAC |
| ENSMUSG00000031950 | *Lc3*-F | AGTCTCGGGCTCTCAGATTG |
|  | *Lc3*-R | CCACAAACAGGAAGATGGCC |
| ENSMUSG00000022419 | *Deptor*-F | GGATGATGGGACCTTTGCAC |
|  | *Deptor*-R | TCTCTAGGCTGGAGGAGTGT |
| ENSMUSG00000006056 | *NDP52*-F | GCAAGGACTGGATTGGCATC |
|  | *NDP52*-R | CTCCACATCCTTGGGAAGGT |
|  | Mouse *GAPDH*-F | ATCACTGCCACCCAGAAG |
|  | Mouse *GAPDH*-R | TCCACGACGGACACATTG |
