# Supplementary material
Source: Research Square preprint supplement (doi:10.21203/rs.3.rs-8962384/v1)
Supplement: Supplementary file 2 [file 69632686d3c238f4988ce08c.xlsx]

## Sheet: Additional file2：Group_Traf6+8 
gene_id	baseMean	log2FoldChange	lfcSE	stat	pvalue	padj	Chr	Start	End	Strand	GeneSymbol	Description	GO_BP	GO_CC	GO_MF	KO
ENSMUSG00000000555	5567.9	1.44962	0.0377682	38.3822	0	0	15	103344286	103366763	-	Itga5	integrin alpha 5 (fibronectin receptor alpha) [Source:MGI Symbol%3BAcc:MGI:96604]	GO:0007044:cell-substrate junction assembly;GO:0007157:heterophilic cell-cell adhesion via plasma membrane cell adhesion molecules;GO:0007159:leukocyte cell-cell adhesion;GO:0007229:integrin-mediated signaling pathway;GO:0007613:memory;GO:0010811:positive regulation of cell-substrate adhesion;GO:0030335:positive regulation of cell migration;GO:0031589:cell-substrate adhesion;GO:0033627:cell adhes…	GO:0005783:endoplasmic reticulum;GO:0005794:Golgi apparatus;GO:0005886:plasma membrane;GO:0005911:cell-cell junction;GO:0005925:focal adhesion;GO:0008305:integrin complex;GO:0009897:external side of plasma membrane;GO:0009986:cell surface;GO:0031410:cytoplasmic vesicle;GO:0032587:ruffle membrane;GO:0045202:synapse;	GO:0005154:epidermal growth factor receptor binding;GO:0005178:integrin binding;GO:0005515:protein binding;GO:0046872:metal ion binding;	K06484
ENSMUSG00000003617	2717.8	-4.09452	0.0649302	-63.0604	0	0	3	19957054	20009145	+	Cp	ceruloplasmin [Source:MGI Symbol%3BAcc:MGI:88476]	GO:0006825:copper ion transport;GO:0006879:cellular iron ion homeostasis;GO:0055114:oxidation-reduction process;	GO:0005615:extracellular space;GO:0005765:lysosomal membrane;GO:0070062:extracellular exosome;GO:0072562:blood microparticle;	GO:0004322:ferroxidase activity;GO:0005507:copper ion binding;GO:0051087:chaperone binding;	K13624
ENSMUSG00000005124	5601.96	1.88943	0.0435687	43.3666	0	0	15	66891320	66923201	+	Wisp1	WNT1 inducible signaling pathway protein 1 [Source:MGI Symbol%3BAcc:MGI:1197008]	GO:0001558:regulation of cell growth;GO:0007155:cell adhesion;GO:0007165:signal transduction;GO:0007267:cell-cell signaling;GO:0016055:Wnt signaling pathway;GO:0060548:negative regulation of cell death;	GO:0005578:proteinaceous extracellular matrix;GO:0005615:extracellular space;GO:0005829:cytosol;	GO:0005178:integrin binding;GO:0005520:insulin-like growth factor binding;GO:0008201:heparin binding;	-
ENSMUSG00000007805	3447.97	-2.68233	0.056823	-47.2049	0	0	1	91801461	91848028	+	Twist2	twist basic helix-loop-helix transcription factor 2 [Source:MGI Symbol%3BAcc:MGI:104685]	GO:0000122:negative regulation of transcription from RNA polymerase II promoter;GO:0001649:osteoblast differentiation;GO:0006351:transcription, DNA-templated;GO:0006357:regulation of transcription from RNA polymerase II promoter;GO:0008285:negative regulation of cell proliferation;GO:0010838:positive regulation of keratinocyte proliferation;GO:0032720:negative regulation of tumor necrosis factor …	GO:0005634:nucleus;GO:0005667:transcription factor complex;GO:0005730:nucleolus;GO:0005737:cytoplasm;	GO:0001076:RNA polymerase II transcription factor binding transcription factor activity;GO:0003677:DNA binding;GO:0003682:chromatin binding;GO:0003700:sequence-specific DNA binding transcription factor activity;GO:0005515:protein binding;GO:0019904:protein domain specific binding;GO:0046983:protein dimerization activity;	K09069
ENSMUSG00000011179	11410.9	-1.72332	0.0357241	-48.2398	0	0	12	17544794	17551505	+	Odc1	ornithine decarboxylase%2C structural 1 [Source:MGI Symbol%3BAcc:MGI:97402]	GO:0001822:kidney development;GO:0008284:positive regulation of cell proliferation;GO:0009615:response to virus;GO:0033387:putrescine biosynthetic process from ornithine;GO:0042176:regulation of protein catabolic process;	GO:0005737:cytoplasm;GO:0005829:cytosol;GO:0048471:perinuclear region of cytoplasm;	GO:0004586:ornithine decarboxylase activity;GO:0042803:protein homodimerization activity;	K01581;K01586
ENSMUSG00000016494	1893.31	-2.1794	0.0571417	-38.1402	0	0	1	194938819	194961279	+	Cd34	CD34 antigen [Source:MGI Symbol%3BAcc:MGI:88329]	GO:0001894:tissue homeostasis;GO:0001935:endothelial cell proliferation;GO:0003094:glomerular filtration;GO:0007160:cell-matrix adhesion;GO:0007165:signal transduction;GO:0008217:regulation of blood pressure;GO:0008283:cell proliferation;GO:0010628:positive regulation of gene expression;GO:0010629:negative regulation of gene expression;GO:0016337:single organismal cell-cell adhesion;GO:0030097:he…	GO:0005576:extracellular region;GO:0005737:cytoplasm;GO:0005764:lysosome;GO:0005886:plasma membrane;GO:0005887:integral component of plasma membrane;GO:0009897:external side of plasma membrane;GO:0009925:basal plasma membrane;GO:0009986:cell surface;GO:0016020:membrane;GO:0016324:apical plasma membrane;GO:0036053:glomerular endothelium fenestra;GO:0045171:intercellular bridge;GO:0048471:perinucle…	GO:0008134:transcription factor binding;GO:0030246:carbohydrate binding;GO:0043199:sulfate binding;	K06474
ENSMUSG00000017002	1314.03	-6.56863	0.167255	-39.2731	0	0	2	164354070	164389095	-	Slpi	secretory leukocyte peptidase inhibitor [Source:MGI Symbol%3BAcc:MGI:109297]	GO:0006955:immune response;GO:0010951:negative regulation of endopeptidase activity;GO:0019731:antibacterial humoral response;GO:0032091:negative regulation of protein binding;GO:0032496:response to lipopolysaccharide;GO:0035821:modification of morphology or physiology of other organism;GO:0045071:negative regulation of viral genome replication;GO:0045087:innate immune response;	GO:0005615:extracellular space;GO:0005794:Golgi apparatus;GO:0031012:extracellular matrix;GO:0070062:extracellular exosome;	GO:0003677:DNA binding;GO:0003729:mRNA binding;GO:0004867:serine-type endopeptidase inhibitor activity;GO:0019899:enzyme binding;	-
ENSMUSG00000018604	931.297	-3.05205	0.0811948	-37.5893	0	0	5	119670669	119684724	+	Tbx3	T-box 3 [Source:MGI Symbol%3BAcc:MGI:98495]	GO:0000122:negative regulation of transcription from RNA polymerase II promoter;GO:0001501:skeletal system development;GO:0001568:blood vessel development;GO:0001701:in utero embryonic development;GO:0001947:heart looping;GO:0003007:heart morphogenesis;GO:0003151:outflow tract morphogenesis;GO:0003167:atrioventricular bundle cell differentiation;GO:0006351:transcription, DNA-templated;GO:0007569:…	GO:0005634:nucleus;	GO:0000978:RNA polymerase II core promoter proximal region sequence-specific DNA binding;GO:0001078:RNA polymerase II core promoter proximal region sequence-specific DNA binding transcription factor activity involved in negative regulation of transcription;GO:0001085:RNA polymerase II transcription factor binding;GO:0001102:RNA polymerase II activating transcription factor binding;GO:0003700:sequ…	K10177
ENSMUSG00000019929	4133.52	-2.65439	0.0460858	-57.5967	0	0	10	97479609	97518143	+	Dcn	decorin [Source:MGI Symbol%3BAcc:MGI:94872]	GO:0001822:kidney development;GO:0001890:placenta development;GO:0006469:negative regulation of protein kinase activity;GO:0007519:skeletal muscle tissue development;GO:0007568:aging;GO:0009612:response to mechanical stimulus;GO:0010508:positive regulation of autophagy;GO:0010596:negative regulation of endothelial cell migration;GO:0014068:positive regulation of phosphatidylinositol 3-kinase sign…	GO:0005578:proteinaceous extracellular matrix;GO:0005589:collagen type VI trimer;GO:0005615:extracellular space;GO:0005737:cytoplasm;GO:0031012:extracellular matrix;	GO:0003723:RNA binding;GO:0004860:protein kinase inhibitor activity;GO:0005518:collagen binding;GO:0005539:glycosaminoglycan binding;GO:0047485:protein N-terminus binding;GO:0050840:extracellular matrix binding;	K04660
ENSMUSG00000020950	1534.5	6.88397	0.156258	44.0551	0	0	12	49382660	49386861	+	Foxg1	forkhead box G1 [Source:MGI Symbol%3BAcc:MGI:1347464]	GO:0000122:negative regulation of transcription from RNA polymerase II promoter;GO:0002052:positive regulation of neuroblast proliferation;GO:0006351:transcription, DNA-templated;GO:0007346:regulation of mitotic cell cycle;GO:0009953:dorsal/ventral pattern formation;GO:0010468:regulation of gene expression;GO:0016199:axon midline choice point recognition;GO:0021852:pyramidal neuron migration;GO:0…	GO:0005634:nucleus;	GO:0000981:sequence-specific DNA binding RNA polymerase II transcription factor activity;GO:0001227:RNA polymerase II transcription regulatory region sequence-specific DNA binding transcription factor activity involved in negative regulation of transcription;GO:0005515:protein binding;GO:0043565:sequence-specific DNA binding;	K09385
ENSMUSG00000022206	1130.11	3.17131	0.0792904	39.9961	0	0	15	11839896	11905674	-	Npr3	natriuretic peptide receptor 3 [Source:MGI Symbol%3BAcc:MGI:97373]	GO:0001501:skeletal system development;GO:0002158:osteoclast proliferation;GO:0007193:adenylate cyclase-inhibiting G-protein coupled receptor signaling pathway;GO:0007194:negative regulation of adenylate cyclase activity;GO:0007200:phospholipase C-activating G-protein coupled receptor signaling pathway;GO:0008217:regulation of blood pressure;GO:0030157:pancreatic juice secretion;GO:0033688:regula…	GO:0005622:intracellular;GO:0016021:integral component of membrane;GO:0043234:protein complex;GO:0070062:extracellular exosome;	GO:0008528:G-protein coupled peptide receptor activity;GO:0016941:natriuretic peptide receptor activity;GO:0017046:peptide hormone binding;GO:0031404:chloride ion binding;GO:0042277:peptide binding;GO:0042562:hormone binding;GO:0042803:protein homodimerization activity;	K12325
ENSMUSG00000023092	815.813	5.06236	0.127768	39.6214	0	0	X	56731787	56793346	+	Fhl1	four and a half LIM domains 1 [Source:MGI Symbol%3BAcc:MGI:1298387]	GO:0003254:regulation of membrane depolarization;GO:0007275:multicellular organismal development;GO:0010972:negative regulation of G2/M transition of mitotic cell cycle;GO:0030154:cell differentiation;GO:0030308:negative regulation of cell growth;GO:0043268:positive regulation of potassium ion transport;GO:1901016:regulation of potassium ion transmembrane transporter activity;GO:2000134:negative …	GO:0005634:nucleus;GO:0005737:cytoplasm;GO:0005829:cytosol;GO:0005886:plasma membrane;GO:0005925:focal adhesion;	GO:0044325:ion channel binding;GO:0046872:metal ion binding;	K14365
ENSMUSG00000024087	4389.63	2.10835	0.053532	39.3848	0	0	17	79706953	79715041	-	Cyp1b1	cytochrome P450%2C family 1%2C subfamily b%2C polypeptide 1 [Source:MGI Symbol%3BAcc:MGI:88590]	GO:0001525:angiogenesis;GO:0002930:trabecular meshwork development;GO:0006725:cellular aromatic compound metabolic process;GO:0006805:xenobiotic metabolic process;GO:0006809:nitric oxide biosynthetic process;GO:0007155:cell adhesion;GO:0008202:steroid metabolic process;GO:0008210:estrogen metabolic process;GO:0008285:negative regulation of cell proliferation;GO:0008631:intrinsic apoptotic signali…	GO:0005739:mitochondrion;GO:0005789:endoplasmic reticulum membrane;GO:0031090:organelle membrane;	GO:0004497:monooxygenase activity;GO:0005506:iron ion binding;GO:0016712:oxidoreductase activity, acting on paired donors, with incorporation or reduction of molecular oxygen, reduced flavin or flavoprotein as one donor, and incorporation of one atom of oxygen;GO:0020037:heme binding;GO:0070330:aromatase activity;	K07410
ENSMUSG00000024164	1093.7	-3.04661	0.0803709	-37.9069	0	0	17	57203970	57228136	-	C3	complement component 3 [Source:MGI Symbol%3BAcc:MGI:88227]	GO:0001798:positive regulation of type IIa hypersensitivity;GO:0001934:positive regulation of protein phosphorylation;GO:0001970:positive regulation of activation of membrane attack complex;GO:0006631:fatty acid metabolic process;GO:0006911:phagocytosis, engulfment;GO:0006954:inflammatory response;GO:0006956:complement activation;GO:0006957:complement activation, alternative pathway;GO:0006958:co…	GO:0005615:extracellular space;GO:0043234:protein complex;GO:0070062:extracellular exosome;GO:0072562:blood microparticle;	GO:0004866:endopeptidase inhibitor activity;GO:0005515:protein binding;GO:0031715:C5L2 anaphylatoxin chemotactic receptor binding;	-
ENSMUSG00000026483	1573.73	-6.01088	0.132183	-45.474	0	0	1	151571186	151721939	+	Fam129a	family with sequence similarity 129%2C member A [Source:MGI Symbol%3BAcc:MGI:2137237]	GO:0001933:negative regulation of protein phosphorylation;GO:0001934:positive regulation of protein phosphorylation;GO:0034976:response to endoplasmic reticulum stress;GO:0045727:positive regulation of translation;	GO:0005737:cytoplasm;GO:0005829:cytosol;GO:0005886:plasma membrane;GO:0016020:membrane;GO:0070062:extracellular exosome;	GO:0003674:molecular_function;	-
ENSMUSG00000027800	4537.14	-5.34249	0.0741151	-72.0837	0	0	3	57285611	57301988	-	Tm4sf1	transmembrane 4 superfamily member 1 [Source:MGI Symbol%3BAcc:MGI:104678]	-	GO:0005887:integral component of plasma membrane;GO:0016021:integral component of membrane;	-	-
ENSMUSG00000027955	2546.78	2.10051	0.0549009	38.2601	0	0	3	79884533	79946280	+	Fam198b	family with sequence similarity 198%2C member B [Source:MGI Symbol%3BAcc:MGI:1915909]	GO:0008150:biological_process;	GO:0000139:Golgi membrane;GO:0005794:Golgi apparatus;GO:0016021:integral component of membrane;	GO:0003674:molecular_function;	-
ENSMUSG00000029377	3165.39	-2.42438	0.0555575	-43.6374	0	0	5	91074622	91093646	+	Ereg	epiregulin [Source:MGI Symbol%3BAcc:MGI:107508]	GO:0001525:angiogenesis;GO:0001550:ovarian cumulus expansion;GO:0001556:oocyte maturation;GO:0001819:positive regulation of cytokine production;GO:0007143:female meiotic division;GO:0007173:epidermal growth factor receptor signaling pathway;GO:0007267:cell-cell signaling;GO:0008284:positive regulation of cell proliferation;GO:0008285:negative regulation of cell proliferation;GO:0009299:mRNA trans…	GO:0005615:extracellular space;GO:0005886:plasma membrane;GO:0016021:integral component of membrane;	GO:0005154:epidermal growth factor receptor binding;GO:0008083:growth factor activity;	K09784
ENSMUSG00000029838	3963.89	4.76907	0.0723362	65.9292	0	0	6	36714929	36810220	-	Ptn	pleiotrophin [Source:MGI Symbol%3BAcc:MGI:97804]	GO:0001503:ossification;GO:0001889:liver development;GO:0007507:heart development;GO:0007612:learning;GO:0008284:positive regulation of cell proliferation;GO:0008360:regulation of cell shape;GO:0010811:positive regulation of cell-substrate adhesion;GO:0010976:positive regulation of neuron projection development;GO:0014823:response to activity;GO:0016525:negative regulation of angiogenesis;GO:0021…	GO:0005578:proteinaceous extracellular matrix;GO:0005604:basement membrane;GO:0005615:extracellular space;GO:0005783:endoplasmic reticulum;GO:0009986:cell surface;GO:0016020:membrane;GO:0031594:neuromuscular junction;GO:0043234:protein complex;GO:0048471:perinuclear region of cytoplasm;	GO:0008083:growth factor activity;GO:0008201:heparin binding;GO:0019901:protein kinase binding;GO:0035373:chondroitin sulfate proteoglycan binding;GO:0035374:chondroitin sulfate binding;GO:0038085:vascular endothelial growth factor binding;	K16642
ENSMUSG00000031502	3380.61	4.7076	0.0720418	65.3455	0	0	8	11198423	11312826	-	Col4a1	collagen%2C type IV%2C alpha 1 [Source:MGI Symbol%3BAcc:MGI:88454]	GO:0001569:patterning of blood vessels;GO:0007420:brain development;GO:0007528:neuromuscular junction development;GO:0030198:extracellular matrix organization;GO:0030855:epithelial cell differentiation;GO:0038063:collagen-activated tyrosine kinase receptor signaling pathway;GO:0048514:blood vessel morphogenesis;GO:0061304:retinal blood vessel morphogenesis;GO:0061333:renal tubule morphogenesis;GO…	GO:0005576:extracellular region;GO:0005587:collagen type IV trimer;GO:0005604:basement membrane;GO:0005615:extracellular space;GO:0031012:extracellular matrix;	GO:0005201:extracellular matrix structural constituent;GO:0048407:platelet-derived growth factor binding;	K06237
ENSMUSG00000031503	2034.48	4.84069	0.0872969	55.4509	0	0	8	11312805	11449287	+	Col4a2	collagen%2C type IV%2C alpha 2 [Source:MGI Symbol%3BAcc:MGI:88455]	GO:0001525:angiogenesis;GO:0006351:transcription, DNA-templated;GO:0016525:negative regulation of angiogenesis;GO:0030198:extracellular matrix organization;GO:0035987:endodermal cell differentiation;GO:0038063:collagen-activated tyrosine kinase receptor signaling pathway;GO:0071560:cellular response to transforming growth factor beta stimulus;	GO:0005576:extracellular region;GO:0005587:collagen type IV trimer;GO:0005604:basement membrane;GO:0005615:extracellular space;GO:0031012:extracellular matrix;GO:0070062:extracellular exosome;	GO:0005201:extracellular matrix structural constituent;	-
ENSMUSG00000031740	2406.57	-2.63803	0.0523006	-50.4397	0	0	8	92827291	92853420	+	Mmp2	matrix metallopeptidase 2 [Source:MGI Symbol%3BAcc:MGI:97009]	GO:0001525:angiogenesis;GO:0001666:response to hypoxia;GO:0001955:blood vessel maturation;GO:0001957:intramembranous ossification;GO:0006508:proteolysis;GO:0007566:embryo implantation;GO:0030574:collagen catabolic process;GO:0035987:endodermal cell differentiation;GO:0045089:positive regulation of innate immune response;GO:0048705:skeletal system morphogenesis;GO:0060325:face morphogenesis;GO:006…	GO:0005578:proteinaceous extracellular matrix;GO:0005615:extracellular space;GO:0005634:nucleus;GO:0005737:cytoplasm;GO:0005739:mitochondrion;GO:0005886:plasma membrane;GO:0030017:sarcomere;GO:0031012:extracellular matrix;	GO:0004222:metalloendopeptidase activity;GO:0004252:serine-type endopeptidase activity;GO:0008237:metallopeptidase activity;GO:0008270:zinc ion binding;	K01398
ENSMUSG00000032487	11515.8	-2.10781	0.0542513	-38.8527	0	0	1	150100031	150108227	+	Ptgs2	prostaglandin-endoperoxide synthase 2 [Source:MGI Symbol%3BAcc:MGI:97798]	GO:0001516:prostaglandin biosynthetic process;GO:0001525:angiogenesis;GO:0006954:inflammatory response;GO:0006979:response to oxidative stress;GO:0007566:embryo implantation;GO:0007568:aging;GO:0007612:learning;GO:0007613:memory;GO:0008217:regulation of blood pressure;GO:0008285:negative regulation of cell proliferation;GO:0009750:response to fructose;GO:0010042:response to manganese ion;GO:00102…	GO:0005737:cytoplasm;GO:0005783:endoplasmic reticulum;GO:0005789:endoplasmic reticulum membrane;GO:0005901:caveola;GO:0031090:organelle membrane;GO:0043005:neuron projection;GO:0043234:protein complex;	GO:0004601:peroxidase activity;GO:0004666:prostaglandin-endoperoxide synthase activity;GO:0008289:lipid binding;GO:0016702:oxidoreductase activity, acting on single donors with incorporation of molecular oxygen, incorporation of two atoms of oxygen;GO:0019899:enzyme binding;GO:0020037:heme binding;GO:0042803:protein homodimerization activity;GO:0046872:metal ion binding;	K11987
ENSMUSG00000035783	15899.3	3.00677	0.0524335	57.3445	0	0	19	34241090	34255336	-	Acta2	actin%2C alpha 2%2C smooth muscle%2C aorta [Source:MGI Symbol%3BAcc:MGI:87909]	GO:0008217:regulation of blood pressure;GO:0009615:response to virus;GO:0010628:positive regulation of gene expression;GO:0014829:vascular smooth muscle contraction;GO:0072144:glomerular mesangial cell development;GO:0090131:mesenchyme migration;	GO:0005615:extracellular space;GO:0005737:cytoplasm;GO:0005856:cytoskeleton;GO:0015629:actin cytoskeleton;GO:0030027:lamellipodium;GO:0030175:filopodium;GO:0030485:smooth muscle contractile fiber;GO:0043234:protein complex;GO:0044297:cell body;GO:0070062:extracellular exosome;	GO:0005515:protein binding;GO:0005524:ATP binding;GO:0019901:protein kinase binding;	K12313
ENSMUSG00000040026	1347.41	-4.06506	0.0948807	-42.844	0	0	7	46711998	46715700	-	Saa3	serum amyloid A 3 [Source:MGI Symbol%3BAcc:MGI:98223]	GO:0006953:acute-phase response;GO:0007252:I-kappaB phosphorylation;GO:0035634:response to stilbenoid;GO:0050918:positive chemotaxis;GO:0060326:cell chemotaxis;GO:0071347:cellular response to interleukin-1;	GO:0005615:extracellular space;GO:0005622:intracellular;GO:0034364:high-density lipoprotein particle;	GO:0035662:Toll-like receptor 4 binding;GO:0042056:chemoattractant activity;	K17310
ENSMUSG00000048758	1456.83	-4.55874	0.0928453	-49.1004	0	0	9	106429454	106431568	+	Rpl29	ribosomal protein L29 [Source:MGI Symbol%3BAcc:MGI:99687]	GO:0002181:cytoplasmic translation;GO:0006412:translation;GO:0008283:cell proliferation;GO:0031589:cell-substrate adhesion;GO:0035264:multicellular organism growth;	GO:0019898:extrinsic component of membrane;GO:0022625:cytosolic large ribosomal subunit;GO:0022626:cytosolic ribosome;GO:0042788:polysomal ribosome;	GO:0003735:structural constituent of ribosome;GO:0008201:heparin binding;	K02905
ENSMUSG00000049775	14347.5	3.28815	0.0551706	59.5997	0	0	X	167207093	167209315	-	Tmsb4x	thymosin%2C beta 4%2C X chromosome [Source:MGI Symbol%3BAcc:MGI:99510]	GO:0007015:actin filament organization;GO:0014911:positive regulation of smooth muscle cell migration;GO:0030334:regulation of cell migration;GO:0045893:positive regulation of transcription, DNA-templated;GO:0051152:positive regulation of smooth muscle cell differentiation;	GO:0005615:extracellular space;GO:0005634:nucleus;GO:0005829:cytosol;GO:0005856:cytoskeleton;	GO:0003785:actin monomer binding;GO:0005515:protein binding;	K05764
ENSMUSG00000050335	5403.46	-7.87643	0.133044	-59.2016	0	0	14	47367751	47386160	+	Lgals3	lectin%2C galactose binding%2C soluble 3 [Source:MGI Symbol%3BAcc:MGI:96778]	GO:0001501:skeletal system development;GO:0002548:monocyte chemotaxis;GO:0006397:mRNA processing;GO:0006898:receptor-mediated endocytosis;GO:0008380:RNA splicing;GO:0030154:cell differentiation;GO:0030198:extracellular matrix organization;GO:0030593:neutrophil chemotaxis;GO:0042129:regulation of T cell proliferation;GO:0045087:innate immune response;GO:0045185:maintenance of protein location;GO:0…	GO:0001772:immunological synapse;GO:0005576:extracellular region;GO:0005578:proteinaceous extracellular matrix;GO:0005615:extracellular space;GO:0005634:nucleus;GO:0005681:spliceosomal complex;GO:0005737:cytoplasm;GO:0005743:mitochondrial inner membrane;GO:0009897:external side of plasma membrane;GO:0009986:cell surface;GO:0016020:membrane;GO:0031012:extracellular matrix;GO:0070062:extracellular …	GO:0003723:RNA binding;GO:0005515:protein binding;GO:0019863:IgE binding;GO:0030246:carbohydrate binding;GO:0042056:chemoattractant activity;GO:0043236:laminin binding;	K06831
ENSMUSG00000050737	2883.26	-3.06179	0.0539608	-56.7411	0	0	2	30889471	30929863	-	Ptges	prostaglandin E synthase [Source:MGI Symbol%3BAcc:MGI:1927593]	GO:0001516:prostaglandin biosynthetic process;GO:0002526:acute inflammatory response;GO:0002544:chronic inflammatory response;GO:0006693:prostaglandin metabolic process;GO:0008285:negative regulation of cell proliferation;GO:0014070:response to organic cyclic compound;GO:0032496:response to lipopolysaccharide;GO:0032526:response to retinoic acid;GO:0034097:response to cytokine;GO:0051592:response…	GO:0005641:nuclear envelope lumen;GO:0005737:cytoplasm;GO:0016021:integral component of membrane;GO:0048471:perinuclear region of cytoplasm;	GO:0004667:prostaglandin-D synthase activity;GO:0043295:glutathione binding;GO:0050220:prostaglandin-E synthase activity;	K15729
ENSMUSG00000056116	2291.82	-2.30169	0.0595642	-38.6421	0	0	17	36037128	36042747	-	H2-T22	histocompatibility 2%2C T region locus 22 [Source:MGI Symbol%3BAcc:MGI:95956]	GO:0002474:antigen processing and presentation of peptide antigen via MHC class I;	GO:0005886:plasma membrane;GO:0016021:integral component of membrane;	GO:0005102:receptor binding;GO:0042605:peptide antigen binding;	K06751
ENSMUSG00000059751	2088.97	4.02047	0.0720365	55.8116	0	0	13	108670603	108671397	+	Rps3a3	ribosomal protein S3A3 [Source:MGI Symbol%3BAcc:MGI:3643406]	-	-	-	K02984
ENSMUSG00000061353	5090.96	4.03148	0.0523422	77.0215	0	0	6	117168535	117181367	+	Cxcl12	chemokine (C-X-C motif) ligand 12 [Source:MGI Symbol%3BAcc:MGI:103556]	GO:0001569:patterning of blood vessels;GO:0001667:ameboidal-type cell migration;GO:0006952:defense response;GO:0006955:immune response;GO:0007281:germ cell development;GO:0007420:brain development;GO:0008045:motor neuron axon guidance;GO:0008354:germ cell migration;GO:0030334:regulation of cell migration;GO:0030335:positive regulation of cell migration;GO:0042098:T cell proliferation;GO:0045785:p…	GO:0009897:external side of plasma membrane;GO:0070062:extracellular exosome;	GO:0008009:chemokine activity;GO:0008083:growth factor activity;GO:0042056:chemoattractant activity;GO:0042379:chemokine receptor binding;GO:0045236:CXCR chemokine receptor binding;	K10031
ENSMUSG00000062380	1060.86	-3.09952	0.0789288	-39.2699	0	0	8	123411424	123422015	+	Tubb3	tubulin%2C beta 3 class III [Source:MGI Symbol%3BAcc:MGI:107813]	GO:0000278:mitotic cell cycle;GO:0007010:cytoskeleton organization;GO:0007017:microtubule-based process;GO:0007411:axon guidance;	GO:0005622:intracellular;GO:0005634:nucleus;GO:0005737:cytoplasm;GO:0005874:microtubule;GO:0015630:microtubule cytoskeleton;GO:0030424:axon;GO:0030425:dendrite;GO:0043025:neuronal cell body;GO:0070062:extracellular exosome;GO:0071944:cell periphery;	GO:0003924:GTPase activity;GO:0005200:structural constituent of cytoskeleton;GO:0005515:protein binding;GO:0005525:GTP binding;GO:0042277:peptide binding;	K07375
ENSMUSG00000062611	4037.68	5.37234	0.112624	47.7015	0	0	14	88123017	88123808	-	Rps3a2	ribosomal protein S3A2 [Source:MGI Symbol%3BAcc:MGI:3642853]	-	-	-	K02984
ENSMUSG00000063011	3869.07	2.15864	0.0428727	50.35	0	0	17	25748614	25754327	-	Msln	mesothelin [Source:MGI Symbol%3BAcc:MGI:1888992]	GO:0007160:cell-matrix adhesion;GO:0031016:pancreas development;	GO:0005615:extracellular space;GO:0005794:Golgi apparatus;GO:0005886:plasma membrane;GO:0009986:cell surface;GO:0031225:anchored component of membrane;	GO:0005515:protein binding;	K20733
ENSMUSG00000084349	3817.1	2.19609	0.0529011	41.5132	0	0	X	13202571	13203780	+	Rpl3-ps1	ribosomal protein L3%2C pseudogene 1 [Source:MGI Symbol%3BAcc:MGI:3644217]	-	-	-	K02925
ENSMUSG00000107092	939.889	-5.65983	0.150239	-37.6722	0	0	5	95974240	95975623	+	Gm7993	predicted gene 7993 [Source:MGI Symbol%3BAcc:MGI:3647399]	-	-	-	K01581
ENSMUSG00000110631	2336.49	-2.79831	0.0682397	-41.007	0	0	8	121833247	121841178	+	Gm45836	predicted gene 45836 [Source:MGI Symbol%3BAcc:MGI:5804951]	-	-	-	-
ENSMUSG00000022636	1579.59	2.18834	0.0589623	37.1142	1.66e-301	8.16e-299	16	52248996	52454074	-	Alcam	activated leukocyte cell adhesion molecule [Source:MGI Symbol%3BAcc:MGI:1313266]	GO:0002250:adaptive immune response;GO:0007155:cell adhesion;GO:0007157:heterophilic cell-cell adhesion via plasma membrane cell adhesion molecules;GO:0007411:axon guidance;GO:0008045:motor neuron axon guidance;GO:0031290:retinal ganglion cell axon guidance;GO:0048846:axon extension involved in axon guidance;GO:1990138:neuron projection extension;	GO:0001772:immunological synapse;GO:0005887:integral component of plasma membrane;GO:0005925:focal adhesion;GO:0009897:external side of plasma membrane;GO:0030424:axon;GO:0030425:dendrite;GO:0031226:intrinsic component of plasma membrane;GO:0042101:T cell receptor complex;GO:0043025:neuronal cell body;GO:0070062:extracellular exosome;	GO:0005515:protein binding;	K06547
ENSMUSG00000038587	1499.04	2.58063	0.0697252	37.0115	7.47e-300	3.58e-297	10	4266380	4359470	+	Akap12	A kinase (PRKA) anchor protein (gravin) 12 [Source:MGI Symbol%3BAcc:MGI:1932576]	GO:0006605:protein targeting;GO:0007165:signal transduction;GO:0010739:positive regulation of protein kinase A signaling;GO:0030819:positive regulation of cAMP biosynthetic process;GO:0090036:regulation of protein kinase C signaling;	GO:0005829:cytosol;GO:0005856:cytoskeleton;GO:0005886:plasma membrane;GO:0005925:focal adhesion;	GO:0008179:adenylate cyclase binding;GO:0030159:receptor signaling complex scaffold activity;GO:0051018:protein kinase A binding;	K16528
ENSMUSG00000023972	3276.92	-2.03796	0.0553144	-36.8432	3.75e-297	1.76e-294	17	46564451	46629504	-	Ptk7	PTK7 protein tyrosine kinase 7 [Source:MGI Symbol%3BAcc:MGI:1918711]	GO:0001736:establishment of planar polarity;GO:0001843:neural tube closure;GO:0003281:ventricular septum development;GO:0003401:axis elongation;GO:0006468:protein phosphorylation;GO:0007155:cell adhesion;GO:0007507:heart development;GO:0010976:positive regulation of neuron projection development;GO:0016477:cell migration;GO:0031532:actin cytoskeleton reorganization;GO:0042060:wound healing;GO:004…	GO:0005886:plasma membrane;GO:0005887:integral component of plasma membrane;GO:0005911:cell-cell junction;GO:0005925:focal adhesion;GO:0016020:membrane;	GO:0004714:transmembrane receptor protein tyrosine kinase activity;GO:0005524:ATP binding;GO:0016301:kinase activity;	K05127
ENSMUSG00000026822	798.787	-4.98425	0.135694	-36.7315	2.3e-295	1.05e-292	2	32384633	32388252	-	Lcn2	lipocalin 2 [Source:MGI Symbol%3BAcc:MGI:96757]	GO:0006811:ion transport;GO:0006879:cellular iron ion homeostasis;GO:0009615:response to virus;GO:0009635:response to herbicide;GO:0010046:response to mycotoxin;GO:0010628:positive regulation of gene expression;GO:0015891:siderophore transport;GO:0031346:positive regulation of cell projection organization;GO:0031669:cellular response to nutrient levels;GO:0042493:response to drug;GO:0045087:innat…	GO:0005576:extracellular region;GO:0005615:extracellular space;GO:0005829:cytosol;GO:0070062:extracellular exosome;	GO:0002020:protease binding;GO:0005215:transporter activity;GO:0005506:iron ion binding;GO:0005515:protein binding;GO:0036094:small molecule binding;GO:0042803:protein homodimerization activity;	K21129
ENSMUSG00000024424	1725.45	-1.9867	0.0542819	-36.5997	2.89e-293	1.29e-290	18	12599926	12737050	+	Ttc39c	tetratricopeptide repeat domain 39C [Source:MGI Symbol%3BAcc:MGI:1919997]	GO:0008150:biological_process;	GO:0005575:cellular_component;	GO:0003674:molecular_function;	-
ENSMUSG00000067818	1585.66	2.2766	0.0623522	36.512	7.15e-292	3.12e-289	2	156775420	156781658	+	Myl9	myosin%2C light polypeptide 9%2C regulatory [Source:MGI Symbol%3BAcc:MGI:2138915]	GO:0070527:platelet aggregation;	GO:0001725:stress fiber;GO:0016460:myosin II complex;GO:0030018:Z disc;	GO:0005509:calcium ion binding;GO:0032036:myosin heavy chain binding;	K12755
ENSMUSG00000073411	1285.68	-2.48986	0.0685144	-36.3406	3.7e-289	1.57e-286	17	35262730	35267499	+	H2-D1	histocompatibility 2%2C D region locus 1 [Source:MGI Symbol%3BAcc:MGI:95896]	GO:0001916:positive regulation of T cell mediated cytotoxicity;GO:0002474:antigen processing and presentation of peptide antigen via MHC class I;GO:0002485:antigen processing and presentation of endogenous peptide antigen via MHC class I via ER pathway, TAP-dependent;GO:0006955:immune response;GO:0010977:negative regulation of neuron projection development;	GO:0005783:endoplasmic reticulum;GO:0005794:Golgi apparatus;GO:0005797:Golgi medial cisterna;GO:0005886:plasma membrane;GO:0009897:external side of plasma membrane;GO:0009986:cell surface;GO:0016020:membrane;GO:0030670:phagocytic vesicle membrane;GO:0042612:MHC class I protein complex;GO:0070062:extracellular exosome;GO:0070971:endoplasmic reticulum exit site;GO:0071556:integral component of lume…	GO:0003723:RNA binding;GO:0005102:receptor binding;GO:0005515:protein binding;GO:0030881:beta-2-microglobulin binding;GO:0042605:peptide antigen binding;GO:0042608:T cell receptor binding;GO:0046977:TAP binding;	K06751
ENSMUSG00000024486	2131.29	2.19948	0.061321	35.8684	9.52e-282	3.97e-279	18	36504929	36515805	-	Hbegf	heparin-binding EGF-like growth factor [Source:MGI Symbol%3BAcc:MGI:96070]	GO:0001525:angiogenesis;GO:0001832:blastocyst growth;GO:0007173:epidermal growth factor receptor signaling pathway;GO:0008016:regulation of heart contraction;GO:0008284:positive regulation of cell proliferation;GO:0016477:cell migration;GO:0030307:positive regulation of cell growth;GO:0030335:positive regulation of cell migration;GO:0035313:wound healing, spreading of epidermal cells;GO:0048661:p…	GO:0005576:extracellular region;GO:0005615:extracellular space;GO:0005887:integral component of plasma membrane;GO:0009986:cell surface;	GO:0005154:epidermal growth factor receptor binding;GO:0008083:growth factor activity;GO:0008201:heparin binding;	K08523
ENSMUSG00000024423	1263.54	2.28707	0.0641052	35.6769	9.02e-279	3.68e-276	18	12972252	12992948	+	Impact	impact%2C RWD domain protein [Source:MGI Symbol%3BAcc:MGI:1098233]	GO:0000122:negative regulation of transcription from RNA polymerase II promoter;GO:0001933:negative regulation of protein phosphorylation;GO:0006446:regulation of translational initiation;GO:0031333:negative regulation of protein complex assembly;GO:0031953:negative regulation of protein autophosphorylation;GO:0034198:cellular response to amino acid starvation;GO:0042149:cellular response to gluc…	GO:0005737:cytoplasm;GO:0005844:polysome;	GO:0003779:actin binding;GO:0005515:protein binding;GO:0043022:ribosome binding;	-
ENSMUSG00000050069	777.012	-5.13625	0.144257	-35.605	1.17e-277	4.69e-275	1	174833785	174921819	-	Grem2	gremlin 2%2C DAN family BMP antagonist [Source:MGI Symbol%3BAcc:MGI:1344367]	GO:0010172:embryonic body morphogenesis;GO:0019221:cytokine-mediated signaling pathway;GO:0030514:negative regulation of BMP signaling pathway;GO:0038098:sequestering of BMP from receptor via BMP binding;GO:0048263:determination of dorsal identity;GO:0060300:regulation of cytokine activity;	GO:0005615:extracellular space;	GO:0005125:cytokine activity;GO:0008201:heparin binding;GO:0036122:BMP binding;GO:0042803:protein homodimerization activity;	-
ENSMUSG00000001435	901.892	2.74653	0.0778724	35.2697	1.71e-272	6.7e-270	10	77052178	77166548	-	Col18a1	collagen%2C type XVIII%2C alpha 1 [Source:MGI Symbol%3BAcc:MGI:88451]	GO:0001525:angiogenesis;GO:0001886:endothelial cell morphogenesis;GO:0007155:cell adhesion;GO:0008284:positive regulation of cell proliferation;GO:0030198:extracellular matrix organization;GO:0030335:positive regulation of cell migration;GO:0042493:response to drug;GO:0051599:response to hydrostatic pressure;GO:2000353:positive regulation of endothelial cell apoptotic process;	GO:0005581:collagen trimer;GO:0005604:basement membrane;GO:0005615:extracellular space;GO:0031012:extracellular matrix;GO:0070062:extracellular exosome;	GO:0005198:structural molecule activity;GO:0046872:metal ion binding;	K06823
ENSMUSG00000025969	1757.09	-2.19894	0.0625346	-35.1636	7.19e-271	2.76e-268	1	62703285	62818695	+	Nrp2	neuropilin 2 [Source:MGI Symbol%3BAcc:MGI:1100492]	GO:0001525:angiogenesis;GO:0001755:neural crest cell migration;GO:0001764:neuron migration;GO:0007411:axon guidance;GO:0007507:heart development;GO:0021612:facial nerve structural organization;GO:0021649:vestibulocochlear nerve structural organization;GO:0021675:nerve development;GO:0021828:gonadotrophin-releasing hormone neuronal migration to the hypothalamus;GO:0036486:ventral trunk neural cres…	GO:0005886:plasma membrane;GO:0016021:integral component of membrane;GO:0030424:axon;	GO:0005021:vascular endothelial growth factor-activated receptor activity;GO:0005515:protein binding;GO:0008201:heparin binding;GO:0017154:semaphorin receptor activity;GO:0046872:metal ion binding;	K06819
ENSMUSG00000067608	623.011	5.00364	0.143327	34.9107	5.11e-267	1.92e-264	19	9283238	9284494	+	Pcna-ps2	proliferating cell nuclear antigen pseudogene 2 [Source:MGI Symbol%3BAcc:MGI:97505]	GO:0006260:DNA replication;GO:0006275:regulation of DNA replication;	GO:0005634:nucleus;	GO:0003677:DNA binding;GO:0030337:DNA polymerase processivity factor activity;	K04802
ENSMUSG00000029816	2511.09	1.6414	0.0474814	34.5694	7.29e-262	2.69e-259	6	49036546	49070929	+	Gpnmb	glycoprotein (transmembrane) nmb [Source:MGI Symbol%3BAcc:MGI:1934765]	GO:0001649:osteoblast differentiation;GO:0001818:negative regulation of cytokine production;GO:0001934:positive regulation of protein phosphorylation;GO:0007155:cell adhesion;GO:0007165:signal transduction;GO:0007267:cell-cell signaling;GO:0030282:bone mineralization;GO:0030335:positive regulation of cell migration;GO:0031954:positive regulation of protein autophosphorylation;GO:0032720:negative …	GO:0005887:integral component of plasma membrane;GO:0012505:endomembrane system;GO:0016021:integral component of membrane;GO:0030659:cytoplasmic vesicle membrane;GO:0031410:cytoplasmic vesicle;GO:0042470:melanosome;	GO:0005178:integrin binding;GO:0008201:heparin binding;GO:0045545:syndecan binding;GO:0048018:receptor agonist activity;	K20732
ENSMUSG00000032085	2895.02	1.91284	0.0557056	34.3385	2.09e-258	7.57e-256	9	45929619	45936058	-	Tagln	transgelin [Source:MGI Symbol%3BAcc:MGI:106012]	GO:0007010:cytoskeleton organization;GO:0030855:epithelial cell differentiation;	GO:0005737:cytoplasm;	GO:0051015:actin filament binding;	K20526
ENSMUSG00000020806	777.158	-2.98852	0.0873382	-34.2177	1.32e-256	4.68e-254	11	116598165	116627019	-	Rhbdf2	rhomboid 5 homolog 2 [Source:MGI Symbol%3BAcc:MGI:2442473]	GO:0015031:protein transport;GO:0016485:protein processing;GO:0042058:regulation of epidermal growth factor receptor signaling pathway;GO:0050709:negative regulation of protein secretion;	GO:0005789:endoplasmic reticulum membrane;GO:0005886:plasma membrane;GO:0016021:integral component of membrane;	GO:0004252:serine-type endopeptidase activity;	-
ENSMUSG00000006818	3515.6	-1.60754	0.0474468	-33.8809	1.27e-251	4.44e-249	17	13007839	13018119	+	Sod2	superoxide dismutase 2%2C mitochondrial [Source:MGI Symbol%3BAcc:MGI:98352]	GO:0000302:response to reactive oxygen species;GO:0000303:response to superoxide;GO:0001306:age-dependent response to oxidative stress;GO:0001315:age-dependent response to reactive oxygen species;GO:0001666:response to hypoxia;GO:0001836:release of cytochrome c from mitochondria;GO:0001889:liver development;GO:0003032:detection of oxygen;GO:0003069:vasodilation by acetylcholine involved in regula…	GO:0005739:mitochondrion;GO:0005743:mitochondrial inner membrane;GO:0042645:mitochondrial nucleoid;GO:0043209:myelin sheath;GO:0070062:extracellular exosome;	GO:0003677:DNA binding;GO:0004784:superoxide dismutase activity;GO:0005515:protein binding;GO:0016491:oxidoreductase activity;GO:0019825:oxygen binding;GO:0019899:enzyme binding;GO:0030145:manganese ion binding;GO:0042802:identical protein binding;	K04564
ENSMUSG00000031722	944.786	-6.53042	0.194852	-33.5148	2.93e-246	1e-243	8	109575128	109579172	-	Hp	haptoglobin [Source:MGI Symbol%3BAcc:MGI:96211]	GO:0002376:immune system process;GO:0006953:acute-phase response;GO:0007219:Notch signaling pathway;GO:0010942:positive regulation of cell death;GO:0042542:response to hydrogen peroxide;GO:0042742:defense response to bacterium;GO:0051354:negative regulation of oxidoreductase activity;GO:2000296:negative regulation of hydrogen peroxide catabolic process;	GO:0005615:extracellular space;GO:0031838:haptoglobin-hemoglobin complex;GO:0070062:extracellular exosome;GO:0072562:blood microparticle;	GO:0016209:antioxidant activity;GO:0030492:hemoglobin binding;	K16142
ENSMUSG00000032348	690.126	3.33227	0.0998278	33.3802	2.66e-244	8.93e-242	9	78182774	78209349	+	Gsta4	glutathione S-transferase%2C alpha 4 [Source:MGI Symbol%3BAcc:MGI:1309515]	GO:0006749:glutathione metabolic process;GO:0006805:xenobiotic metabolic process;GO:0009635:response to herbicide;GO:0010043:response to zinc ion;GO:0035094:response to nicotine;GO:0071285:cellular response to lithium ion;	GO:0005739:mitochondrion;	GO:0004364:glutathione transferase activity;GO:0008144:drug binding;GO:0043295:glutathione binding;	K00799
ENSMUSG00000039405	709.801	3.89854	0.11697	33.3294	1.45e-243	4.79e-241	7	89507783	89527187	-	Prss23	protease%2C serine 23 [Source:MGI Symbol%3BAcc:MGI:1923703]	GO:0006508:proteolysis;	GO:0005615:extracellular space;GO:0005634:nucleus;GO:0070062:extracellular exosome;	GO:0004252:serine-type endopeptidase activity;	K09627
ENSMUSG00000046186	999.647	2.38814	0.0717057	33.3047	3.3e-243	1.07e-240	9	78615546	78716253	+	Cd109	CD109 antigen [Source:MGI Symbol%3BAcc:MGI:2445221]	GO:0001933:negative regulation of protein phosphorylation;GO:0001942:hair follicle development;GO:0010839:negative regulation of keratinocyte proliferation;GO:0010951:negative regulation of endopeptidase activity;GO:0030512:negative regulation of transforming growth factor beta receptor signaling pathway;GO:0045616:regulation of keratinocyte differentiation;GO:0061045:negative regulation of wound…	GO:0005615:extracellular space;GO:0005886:plasma membrane;GO:0009986:cell surface;GO:0031225:anchored component of membrane;	GO:0004867:serine-type endopeptidase inhibitor activity;GO:0050431:transforming growth factor beta binding;	K06530
ENSMUSG00000053219	540.77	4.23754	0.128362	33.0125	5.37e-239	1.72e-236	10	22158569	22374139	+	Raet1e	retinoic acid early transcript 1E [Source:MGI Symbol%3BAcc:MGI:2675273]	GO:0001913:T cell mediated cytotoxicity;GO:0008150:biological_process;GO:0042267:natural killer cell mediated cytotoxicity;	GO:0005886:plasma membrane;GO:0046658:anchored component of plasma membrane;	GO:0046703:natural killer cell lectin-like receptor binding;	K07987
ENSMUSG00000031788	1235.74	-2.11049	0.0640778	-32.9363	6.64e-238	2.09e-235	8	95099828	95202812	-	Kifc3	kinesin family member C3 [Source:MGI Symbol%3BAcc:MGI:109202]	GO:0007017:microtubule-based process;GO:0007018:microtubule-based movement;GO:0007030:Golgi organization;GO:0045218:zonula adherens maintenance;GO:0090136:epithelial cell-cell adhesion;	GO:0005794:Golgi apparatus;GO:0005813:centrosome;GO:0005871:kinesin complex;GO:0005874:microtubule;GO:0005915:zonula adherens;GO:0030659:cytoplasmic vesicle membrane;GO:0070062:extracellular exosome;	GO:0005524:ATP binding;GO:0008017:microtubule binding;GO:0008569:ATP-dependent microtubule motor activity, minus-end-directed;	K10406
ENSMUSG00000055737	1865.27	2.0556	0.0626085	32.8327	2.01e-236	6.23e-234	15	3317760	3583492	-	Ghr	growth hormone receptor [Source:MGI Symbol%3BAcc:MGI:95708]	GO:0000255:allantoin metabolic process;GO:0006101:citrate metabolic process;GO:0006103:2-oxoglutarate metabolic process;GO:0006105:succinate metabolic process;GO:0006107:oxaloacetate metabolic process;GO:0006549:isoleucine metabolic process;GO:0006573:valine metabolic process;GO:0006600:creatine metabolic process;GO:0006631:fatty acid metabolic process;GO:0006897:endocytosis;GO:0019221:cytokine-m…	GO:0000932:cytoplasmic mRNA processing body;GO:0005576:extracellular region;GO:0005615:extracellular space;GO:0005634:nucleus;GO:0005829:cytosol;GO:0005886:plasma membrane;GO:0005887:integral component of plasma membrane;GO:0009986:cell surface;GO:0016021:integral component of membrane;GO:0019898:extrinsic component of membrane;GO:0043235:receptor complex;GO:0070195:growth hormone receptor comple…	GO:0004903:growth hormone receptor activity;GO:0005515:protein binding;GO:0017046:peptide hormone binding;GO:0019838:growth factor binding;GO:0042803:protein homodimerization activity;	K05080
ENSMUSG00000017679	1356.98	-2.03208	0.0618964	-32.8303	2.17e-236	6.61e-234	2	163602314	163619013	+	Ttpal	tocopherol (alpha) transfer protein-like [Source:MGI Symbol%3BAcc:MGI:1923330]	GO:0006810:transport;GO:0008150:biological_process;	GO:0005622:intracellular;GO:0016020:membrane;	GO:0003674:molecular_function;GO:0005215:transporter activity;	-
ENSMUSG00000031765	2209.6	-2.19966	0.0674145	-32.6289	1.6e-233	4.78e-231	8	94179082	94180327	+	Mt1	metallothionein 1 [Source:MGI Symbol%3BAcc:MGI:97171]	GO:0006875:cellular metal ion homeostasis;GO:0006882:cellular zinc ion homeostasis;GO:0007263:nitric oxide mediated signal transduction;GO:0010038:response to metal ion;GO:0010273:detoxification of copper ion;GO:0043524:negative regulation of neuron apoptotic process;GO:0045926:negative regulation of growth;GO:0046686:response to cadmium ion;GO:0071247:cellular response to chromate;GO:0071294:cel…	GO:0005634:nucleus;GO:0005737:cytoplasm;GO:0005764:lysosome;GO:0005829:cytosol;GO:0048471:perinuclear region of cytoplasm;	GO:0005507:copper ion binding;GO:0008270:zinc ion binding;GO:0046872:metal ion binding;	-
ENSMUSG00000051817	577.314	-3.54756	0.109501	-32.3976	2.96e-230	8.74e-228	2	152393611	152398063	-	Sox12	SRY (sex determining region Y)-box 12 [Source:MGI Symbol%3BAcc:MGI:98360]	GO:0006366:transcription from RNA polymerase II promoter;GO:0021510:spinal cord development;GO:0045165:cell fate commitment;GO:0045944:positive regulation of transcription from RNA polymerase II promoter;GO:0065004:protein-DNA complex assembly;	GO:0005654:nucleoplasm;GO:0032993:protein-DNA complex;	GO:0000976:transcription regulatory region sequence-specific DNA binding;GO:0001077:RNA polymerase II core promoter proximal region sequence-specific DNA binding transcription factor activity involved in positive regulation of transcription;GO:0001105:RNA polymerase II transcription coactivator activity;	K09268
ENSMUSG00000019139	726.898	-6.00557	0.185693	-32.3413	1.84e-229	5.33e-227	8	70594373	70597290	+	Isyna1	myo-inositol 1-phosphate synthase A1 [Source:MGI Symbol%3BAcc:MGI:1919030]	GO:0006021:inositol biosynthetic process;GO:0008654:phospholipid biosynthetic process;	GO:0005737:cytoplasm;	GO:0004512:inositol-3-phosphate synthase activity;	K01858
ENSMUSG00000001870	5641.24	1.54529	0.0478041	32.3255	3.07e-229	8.79e-227	17	75005568	75392512	+	Ltbp1	latent transforming growth factor beta binding protein 1 [Source:MGI Symbol%3BAcc:MGI:109151]	GO:0003281:ventricular septum development;GO:0007179:transforming growth factor beta receptor signaling pathway;GO:0035904:aorta development;GO:0060976:coronary vasculature development;	GO:0001527:microfibril;GO:0005578:proteinaceous extracellular matrix;GO:0005615:extracellular space;GO:0031012:extracellular matrix;GO:0043234:protein complex;	GO:0005509:calcium ion binding;GO:0050431:transforming growth factor beta binding;GO:0050436:microfibril binding;	K17307
ENSMUSG00000057469	487.477	3.99164	0.12421	32.1362	1.38e-226	3.89e-224	12	16810963	16839742	+	E2f6	E2F transcription factor 6 [Source:MGI Symbol%3BAcc:MGI:1354159]	GO:0000083:regulation of transcription involved in G1/S transition of mitotic cell cycle;GO:0000122:negative regulation of transcription from RNA polymerase II promoter;GO:0006351:transcription, DNA-templated;	GO:0005634:nucleus;GO:0005662:DNA replication factor A complex;GO:0005730:nucleolus;GO:0071339:MLL1 complex;GO:0090575:RNA polymerase II transcription factor complex;	GO:0000977:RNA polymerase II regulatory region sequence-specific DNA binding;GO:0001227:RNA polymerase II transcription regulatory region sequence-specific DNA binding transcription factor activity involved in negative regulation of transcription;GO:0003677:DNA binding;GO:0003700:sequence-specific DNA binding transcription factor activity;GO:0046983:protein dimerization activity;	K09390
ENSMUSG00000043067	3286.17	-1.54012	0.048227	-31.9347	8.8e-224	2.44e-221	9	24411776	24503140	-	Dpy19l1	dpy-19-like 1 (C. elegans) [Source:MGI Symbol%3BAcc:MGI:1915685]	GO:0018406:protein C-linked glycosylation via 2'-alpha-mannosyl-L-tryptophan;	GO:0005637:nuclear inner membrane;GO:0016020:membrane;GO:0016021:integral component of membrane;	GO:0000030:mannosyltransferase activity;	-
ENSMUSG00000022186	3724.03	1.30233	0.040797	31.9222	1.32e-223	3.6e-221	15	4026383	4155344	+	Oxct1	3-oxoacid CoA transferase 1 [Source:MGI Symbol%3BAcc:MGI:1914291]	GO:0007420:brain development;GO:0007507:heart development;GO:0007584:response to nutrient;GO:0009725:response to hormone;GO:0014823:response to activity;GO:0035774:positive regulation of insulin secretion involved in cellular response to glucose stimulus;GO:0042182:ketone catabolic process;GO:0042493:response to drug;GO:0042594:response to starvation;GO:0045471:response to ethanol;GO:0046950:cell…	GO:0005654:nucleoplasm;GO:0005739:mitochondrion;GO:0005759:mitochondrial matrix;	GO:0008260:3-oxoacid CoA-transferase activity;GO:0042803:protein homodimerization activity;	K01027
ENSMUSG00000026880	2596.4	-1.75909	0.0553773	-31.7656	1.93e-221	5.22e-219	2	35313986	35336976	-	Stom	stomatin [Source:MGI Symbol%3BAcc:MGI:95403]	GO:0034765:regulation of ion transmembrane transport;GO:0044829:positive regulation by host of viral genome replication;GO:0048524:positive regulation of viral process;GO:0051260:protein homooligomerization;GO:0090314:positive regulation of protein targeting to membrane;GO:1901585:regulation of acid-sensing ion channel activity;	GO:0005615:extracellular space;GO:0005737:cytoplasm;GO:0005739:mitochondrion;GO:0005783:endoplasmic reticulum;GO:0005829:cytosol;GO:0005856:cytoskeleton;GO:0005887:integral component of plasma membrane;GO:0016020:membrane;GO:0031982:vesicle;GO:0042470:melanosome;GO:0045121:membrane raft;GO:0048471:perinuclear region of cytoplasm;GO:0070062:extracellular exosome;GO:0072562:blood microparticle;	GO:0005515:protein binding;GO:0042802:identical protein binding;GO:0042803:protein homodimerization activity;GO:0070063:RNA polymerase binding;	K17286
ENSMUSG00000024924	2642.04	1.47342	0.0468131	31.4746	1.93e-217	5.14e-215	19	27216484	27254231	+	Vldlr	very low density lipoprotein receptor [Source:MGI Symbol%3BAcc:MGI:98935]	GO:0000122:negative regulation of transcription from RNA polymerase II promoter;GO:0006869:lipid transport;GO:0006898:receptor-mediated endocytosis;GO:0008203:cholesterol metabolic process;GO:0021517:ventral spinal cord development;GO:0034436:glycoprotein transport;GO:0034447:very-low-density lipoprotein particle clearance;GO:0038026:reelin-mediated signaling pathway;GO:0045860:positive regulatio…	GO:0005615:extracellular space;GO:0005905:coated pit;GO:0016020:membrane;GO:0016021:integral component of membrane;GO:0034361:very-low-density lipoprotein particle;GO:0043235:receptor complex;	GO:0001948:glycoprotein binding;GO:0005509:calcium ion binding;GO:0005515:protein binding;GO:0030229:very-low-density lipoprotein particle receptor activity;GO:0034185:apolipoprotein binding;GO:0034189:very-low-density lipoprotein particle binding;GO:0034437:glycoprotein transporter activity;GO:0038025:reelin receptor activity;GO:0048306:calcium-dependent protein binding;	K20053
ENSMUSG00000032849	1295.43	-1.97215	0.0627249	-31.4413	5.53e-217	1.45e-214	14	118482692	118706219	-	Abcc4	ATP-binding cassette%2C sub-family C (CFTR/MRP)%2C member 4 [Source:MGI Symbol%3BAcc:MGI:2443111]	GO:0006855:drug transmembrane transport;GO:0010243:response to organonitrogen compound;GO:0014070:response to organic cyclic compound;GO:0032310:prostaglandin secretion;GO:0048661:positive regulation of smooth muscle cell proliferation;GO:0060271:cilium morphogenesis;	GO:0005886:plasma membrane;GO:0005887:integral component of plasma membrane;GO:0016020:membrane;GO:0016323:basolateral plasma membrane;GO:0031088:platelet dense granule membrane;	GO:0005524:ATP binding;GO:0015132:prostaglandin transmembrane transporter activity;GO:0015238:drug transmembrane transporter activity;GO:0042626:ATPase activity, coupled to transmembrane movement of substances;	-
ENSMUSG00000040274	2075.02	-1.64517	0.0525355	-31.3155	2.87e-215	7.45e-213	5	3341485	3531008	+	Cdk6	cyclin-dependent kinase 6 [Source:MGI Symbol%3BAcc:MGI:1277162]	GO:0000082:G1/S transition of mitotic cell cycle;GO:0000122:negative regulation of transcription from RNA polymerase II promoter;GO:0001954:positive regulation of cell-matrix adhesion;GO:0002244:hematopoietic progenitor cell differentiation;GO:0003323:type B pancreatic cell development;GO:0006468:protein phosphorylation;GO:0007219:Notch signaling pathway;GO:0008284:positive regulation of cell pro…	GO:0000307:cyclin-dependent protein kinase holoenzyme complex;GO:0001726:ruffle;GO:0005634:nucleus;GO:0005654:nucleoplasm;GO:0005737:cytoplasm;GO:0005813:centrosome;GO:0005829:cytosol;GO:0097132:cyclin D2-CDK6 complex;	GO:0004693:cyclin-dependent protein serine/threonine kinase activity;GO:0005515:protein binding;GO:0005524:ATP binding;GO:0016301:kinase activity;GO:0030332:cyclin binding;GO:0098770:FBXO family protein binding;	K02091
ENSMUSG00000024659	12566.8	1.60335	0.0514171	31.1833	1.8e-213	4.59e-211	19	20373428	20390944	-	Anxa1	annexin A1 [Source:MGI Symbol%3BAcc:MGI:96819]	GO:0000733:DNA strand renaturation;GO:0001780:neutrophil homeostasis;GO:0002250:adaptive immune response;GO:0002548:monocyte chemotaxis;GO:0002685:regulation of leukocyte migration;GO:0006909:phagocytosis;GO:0006936:muscle contraction;GO:0006954:inflammatory response;GO:0007165:signal transduction;GO:0007166:cell surface receptor signaling pathway;GO:0007187:G-protein coupled receptor signaling p…	GO:0001533:cornified envelope;GO:0001891:phagocytic cup;GO:0005615:extracellular space;GO:0005634:nucleus;GO:0005654:nucleoplasm;GO:0005737:cytoplasm;GO:0005768:endosome;GO:0005829:cytosol;GO:0005886:plasma membrane;GO:0005913:cell-cell adherens junction;GO:0005925:focal adhesion;GO:0009986:cell surface;GO:0016323:basolateral plasma membrane;GO:0016324:apical plasma membrane;GO:0016328:lateral pl…	GO:0003697:single-stranded DNA binding;GO:0003727:single-stranded RNA binding;GO:0004386:helicase activity;GO:0005198:structural molecule activity;GO:0005509:calcium ion binding;GO:0005515:protein binding;GO:0005544:calcium-dependent phospholipid binding;GO:0019834:phospholipase A2 inhibitor activity;GO:0030674:protein binding, bridging;GO:0033676:double-stranded DNA-dependent ATPase activity;GO:…	K17091
ENSMUSG00000017969	1149.35	8.35463	0.268003	31.1737	2.42e-213	6.11e-211	2	167191805	167240604	-	Ptgis	prostaglandin I2 (prostacyclin) synthase [Source:MGI Symbol%3BAcc:MGI:1097156]	GO:0001516:prostaglandin biosynthetic process;GO:0007566:embryo implantation;GO:0032088:negative regulation of NF-kappaB transcription factor activity;GO:0035360:positive regulation of peroxisome proliferator activated receptor signaling pathway;GO:0042981:regulation of apoptotic process;GO:0045019:negative regulation of nitric oxide biosynthetic process;GO:0045766:positive regulation of angiogen…	GO:0005615:extracellular space;GO:0005634:nucleus;GO:0005737:cytoplasm;GO:0005783:endoplasmic reticulum;GO:0005789:endoplasmic reticulum membrane;GO:0005901:caveola;GO:0016021:integral component of membrane;	GO:0004497:monooxygenase activity;GO:0005506:iron ion binding;GO:0008116:prostaglandin-I synthase activity;GO:0016705:oxidoreductase activity, acting on paired donors, with incorporation or reduction of molecular oxygen;GO:0020037:heme binding;	K01831
ENSMUSG00000044042	510.251	-3.91729	0.12601	-31.0871	3.6e-212	8.96e-210	2	113327736	113716767	+	Fmn1	formin 1 [Source:MGI Symbol%3BAcc:MGI:101815]	GO:0001822:kidney development;GO:0010467:gene expression;GO:0030838:positive regulation of actin filament polymerization;GO:0035136:forelimb morphogenesis;GO:0035137:hindlimb morphogenesis;GO:0045010:actin nucleation;GO:0048705:skeletal system morphogenesis;GO:0048813:dendrite morphogenesis;GO:0051127:positive regulation of actin nucleation;GO:0051894:positive regulation of focal adhesion assembl…	GO:0005634:nucleus;GO:0005737:cytoplasm;GO:0005884:actin filament;GO:0005886:plasma membrane;GO:0005912:adherens junction;GO:0015630:microtubule cytoskeleton;	GO:0003779:actin binding;GO:0005515:protein binding;GO:0008017:microtubule binding;GO:0017124:SH3 domain binding;	K10367
ENSMUSG00000022425	1082.84	-2.08055	0.0669955	-31.0551	9.73e-212	2.39e-209	15	54838898	54920146	-	Enpp2	ectonucleotide pyrophosphatase/phosphodiesterase 2 [Source:MGI Symbol%3BAcc:MGI:1321390]	GO:0006644:phospholipid metabolic process;GO:0006898:receptor-mediated endocytosis;GO:0006935:chemotaxis;GO:0006955:immune response;GO:0009395:phospholipid catabolic process;GO:0010634:positive regulation of epithelial cell migration;GO:0030334:regulation of cell migration;GO:0034638:phosphatidylcholine catabolic process;GO:0045765:regulation of angiogenesis;GO:0050731:positive regulation of pept…	GO:0005615:extracellular space;GO:0005887:integral component of plasma membrane;	GO:0003676:nucleic acid binding;GO:0004528:phosphodiesterase I activity;GO:0004551:nucleotide diphosphatase activity;GO:0004622:lysophospholipase activity;GO:0005044:scavenger receptor activity;GO:0005509:calcium ion binding;GO:0008270:zinc ion binding;GO:0030247:polysaccharide binding;GO:0047391:alkylglycerophosphoethanolamine phosphodiesterase activity;	K01122
ENSMUSG00000025666	1692	1.89519	0.0610321	31.0523	1.06e-211	2.58e-209	X	81070698	81097872	+	Tmem47	transmembrane protein 47 [Source:MGI Symbol%3BAcc:MGI:2177570]	-	GO:0005886:plasma membrane;GO:0005911:cell-cell junction;GO:0005912:adherens junction;GO:0016021:integral component of membrane;	GO:0005515:protein binding;	-
ENSMUSG00000026068	687.551	2.71235	0.0877138	30.9228	5.9e-210	1.41e-207	1	40515362	40551705	+	Il18rap	interleukin 18 receptor accessory protein [Source:MGI Symbol%3BAcc:MGI:1338888]	GO:0019221:cytokine-mediated signaling pathway;GO:0070301:cellular response to hydrogen peroxide;	GO:0016021:integral component of membrane;	GO:0004908:interleukin-1 receptor activity;	-
ENSMUSG00000029223	451.684	4.26127	0.137829	30.9171	7.05e-210	1.67e-207	5	66676091	66687234	+	Uchl1	ubiquitin carboxy-terminal hydrolase L1 [Source:MGI Symbol%3BAcc:MGI:103149]	GO:0002931:response to ischemia;GO:0006511:ubiquitin-dependent protein catabolic process;GO:0007409:axonogenesis;GO:0007412:axon target recognition;GO:0007628:adult walking behavior;GO:0008283:cell proliferation;GO:0016579:protein deubiquitination;GO:0019233:sensory perception of pain;GO:0019896:axon transport of mitochondrion;GO:0042755:eating behavior;GO:0043407:negative regulation of MAP kinas…	GO:0005654:nucleoplasm;GO:0005737:cytoplasm;GO:0005789:endoplasmic reticulum membrane;GO:0005829:cytosol;GO:0005886:plasma membrane;GO:0030424:axon;GO:0043025:neuronal cell body;GO:0043209:myelin sheath;GO:0044306:neuron projection terminus;GO:0070062:extracellular exosome;GO:1904115:axon cytoplasm;	GO:0004197:cysteine-type endopeptidase activity;GO:0004843:ubiquitin-specific protease activity;GO:0008242:omega peptidase activity;GO:0016874:ligase activity;GO:0031625:ubiquitin protein ligase binding;GO:0031694:alpha-2A adrenergic receptor binding;GO:0043130:ubiquitin binding;	K05609
ENSMUSG00000076441	713.23	-3.12345	0.101651	-30.7273	2.46e-207	5.75e-205	2	31470207	31520672	+	Ass1	argininosuccinate synthetase 1 [Source:MGI Symbol%3BAcc:MGI:88090]	GO:0000050:urea cycle;GO:0000052:citrulline metabolic process;GO:0000053:argininosuccinate metabolic process;GO:0006526:arginine biosynthetic process;GO:0006531:aspartate metabolic process;GO:0045429:positive regulation of nitric oxide biosynthetic process;GO:0071499:cellular response to laminar fluid shear stress;GO:1903038:negative regulation of leukocyte cell-cell adhesion;	GO:0005739:mitochondrion;GO:0005829:cytosol;GO:0043209:myelin sheath;GO:0070062:extracellular exosome;	GO:0003723:RNA binding;GO:0004055:argininosuccinate synthase activity;GO:0005524:ATP binding;GO:0016597:amino acid binding;GO:0042802:identical protein binding;	K01940
ENSMUSG00000021760	1917.49	1.59856	0.0521667	30.6433	3.24e-206	7.49e-204	13	113042763	113046388	-	Gpx8	glutathione peroxidase 8 (putative) [Source:MGI Symbol%3BAcc:MGI:1916840]	GO:0006979:response to oxidative stress;GO:0055114:oxidation-reduction process;	GO:0005575:cellular_component;GO:0016021:integral component of membrane;	GO:0004601:peroxidase activity;GO:0004602:glutathione peroxidase activity;	K00432
ENSMUSG00000021994	545.287	3.38289	0.110755	30.5438	6.83e-205	1.56e-202	14	28504750	28527447	+	Wnt5a	wingless-type MMTV integration site family%2C member 5A [Source:MGI Symbol%3BAcc:MGI:98958]	GO:0000187:activation of MAPK activity;GO:0001667:ameboidal-type cell migration;GO:0001736:establishment of planar polarity;GO:0001756:somitogenesis;GO:0001819:positive regulation of cytokine production;GO:0001843:neural tube closure;GO:0001934:positive regulation of protein phosphorylation;GO:0001938:positive regulation of endothelial cell proliferation;GO:0001947:heart looping;GO:0002009:morpho…	GO:0005576:extracellular region;GO:0005578:proteinaceous extracellular matrix;GO:0005615:extracellular space;GO:0005788:endoplasmic reticulum lumen;GO:0009986:cell surface;	GO:0003700:sequence-specific DNA binding transcription factor activity;GO:0005102:receptor binding;GO:0005109:frizzled binding;GO:0005110:frizzled-2 binding;GO:0005115:receptor tyrosine kinase-like orphan receptor binding;GO:0005125:cytokine activity;GO:0005515:protein binding;GO:0019904:protein domain specific binding;GO:0044212:transcription regulatory region DNA binding;GO:1902379:chemoattract…	K00444
ENSMUSG00000049866	1579.41	1.71565	0.056191	30.5325	9.64e-205	2.17e-202	1	88673125	88702221	-	Arl4c	ADP-ribosylation factor-like 4C [Source:MGI Symbol%3BAcc:MGI:2445172]	GO:0007264:small GTPase mediated signal transduction;GO:0032456:endocytic recycling;	GO:0005737:cytoplasm;GO:0005829:cytosol;GO:0005886:plasma membrane;GO:0030175:filopodium;	GO:0005525:GTP binding;GO:0043014:alpha-tubulin binding;	K07945
ENSMUSG00000046532	486.934	-4.44912	0.145998	-30.4739	5.78e-204	1.29e-201	X	98148769	98323215	+	Ar	androgen receptor [Source:MGI Symbol%3BAcc:MGI:88064]	GO:0000122:negative regulation of transcription from RNA polymerase II promoter;GO:0001701:in utero embryonic development;GO:0003073:regulation of systemic arterial blood pressure;GO:0003382:epithelial cell morphogenesis;GO:0006351:transcription, DNA-templated;GO:0006355:regulation of transcription, DNA-templated;GO:0006357:regulation of transcription from RNA polymerase II promoter;GO:0006366:tr…	GO:0000790:nuclear chromatin;GO:0005634:nucleus;GO:0005737:cytoplasm;GO:0005886:plasma membrane;GO:0016607:nuclear speck;GO:0043234:protein complex;	GO:0000978:RNA polymerase II core promoter proximal region sequence-specific DNA binding;GO:0001077:RNA polymerase II core promoter proximal region sequence-specific DNA binding transcription factor activity involved in positive regulation of transcription;GO:0001085:RNA polymerase II transcription factor binding;GO:0003682:chromatin binding;GO:0003700:sequence-specific DNA binding transcription …	K08557
ENSMUSG00000022995	3961.38	-1.2742	0.0419032	-30.4082	4.28e-203	9.44e-201	1	181896384	182019990	-	Enah	enabled homolog (Drosophila) [Source:MGI Symbol%3BAcc:MGI:108360]	GO:0001843:neural tube closure;GO:0006928:movement of cell or subcellular component;GO:0007015:actin filament organization;GO:0007411:axon guidance;GO:0008154:actin polymerization or depolymerization;GO:0030036:actin cytoskeleton organization;GO:0050852:T cell receptor signaling pathway;	GO:0001725:stress fiber;GO:0005829:cytosol;GO:0005886:plasma membrane;GO:0005925:focal adhesion;GO:0015629:actin cytoskeleton;GO:0030027:lamellipodium;GO:0030054:cell junction;GO:0030175:filopodium;GO:0045202:synapse;	GO:0003779:actin binding;GO:0005515:protein binding;GO:0005522:profilin binding;GO:0017124:SH3 domain binding;GO:0050699:WW domain binding;	K05746
ENSMUSG00000021728	582.272	-3.05137	0.100394	-30.3938	6.63e-203	1.45e-200	13	117220625	117274098	+	Emb	embigin [Source:MGI Symbol%3BAcc:MGI:95321]	GO:0035879:plasma membrane lactate transport;	GO:0005887:integral component of plasma membrane;GO:0030054:cell junction;GO:0045202:synapse;	-	-
ENSMUSG00000034205	657.827	2.64974	0.0871985	30.3874	8.06e-203	1.74e-200	14	69609068	69695834	+	Loxl2	lysyl oxidase-like 2 [Source:MGI Symbol%3BAcc:MGI:2137913]	GO:0001666:response to hypoxia;GO:0001837:epithelial to mesenchymal transition;GO:0001935:endothelial cell proliferation;GO:0002040:sprouting angiogenesis;GO:0006351:transcription, DNA-templated;GO:0006464:cellular protein modification process;GO:0006898:receptor-mediated endocytosis;GO:0016570:histone modification;GO:0018277:protein deamination;GO:0030199:collagen fibril organization;GO:0032332:…	GO:0005604:basement membrane;GO:0005615:extracellular space;GO:0005634:nucleus;GO:0005654:nucleoplasm;GO:0005694:chromosome;GO:0016020:membrane;GO:0031012:extracellular matrix;	GO:0003682:chromatin binding;GO:0003714:transcription corepressor activity;GO:0004720:protein-lysine 6-oxidase activity;GO:0005044:scavenger receptor activity;GO:0005507:copper ion binding;GO:0035064:methylated histone binding;GO:0070492:oligosaccharide binding;	K00280
ENSMUSG00000027597	2185.73	-1.64168	0.054188	-30.2961	1.29e-201	2.74e-199	2	155059310	155074497	-	Ahcy	S-adenosylhomocysteine hydrolase [Source:MGI Symbol%3BAcc:MGI:87968]	GO:0006730:one-carbon metabolic process;GO:0019510:S-adenosylhomocysteine catabolic process;GO:0033353:S-adenosylmethionine cycle;	GO:0005829:cytosol;GO:0042470:melanosome;GO:0070062:extracellular exosome;	GO:0004013:adenosylhomocysteinase activity;GO:0005507:copper ion binding;GO:0005515:protein binding;GO:0043621:protein self-association;GO:0051287:NAD binding;	-
ENSMUSG00000061232	625.205	-2.92319	0.0964882	-30.2958	1.3e-201	2.74e-199	17	33996017	34000333	-	H2-K1	histocompatibility 2%2C K1%2C K region [Source:MGI Symbol%3BAcc:MGI:95904]	GO:0001916:positive regulation of T cell mediated cytotoxicity;GO:0002474:antigen processing and presentation of peptide antigen via MHC class I;GO:0002485:antigen processing and presentation of endogenous peptide antigen via MHC class I via ER pathway, TAP-dependent;GO:0006955:immune response;GO:0010977:negative regulation of neuron projection development;GO:0042590:antigen processing and presen…	GO:0005783:endoplasmic reticulum;GO:0005794:Golgi apparatus;GO:0005797:Golgi medial cisterna;GO:0009897:external side of plasma membrane;GO:0009986:cell surface;GO:0016020:membrane;GO:0030670:phagocytic vesicle membrane;GO:0042612:MHC class I protein complex;GO:0070062:extracellular exosome;GO:0070971:endoplasmic reticulum exit site;GO:0071556:integral component of lumenal side of endoplasmic ret…	GO:0003723:RNA binding;GO:0005102:receptor binding;GO:0005515:protein binding;GO:0030881:beta-2-microglobulin binding;GO:0042605:peptide antigen binding;GO:0042608:T cell receptor binding;GO:0046977:TAP binding;	K06751
ENSMUSG00000057262	427.64	5.17171	0.171643	30.1305	1.93e-199	4.02e-197	15	52477614	52478228	-	Gm10020	predicted pseudogene 10020 [Source:MGI Symbol%3BAcc:MGI:3642192]	GO:0002181:cytoplasmic translation;	GO:0022625:cytosolic large ribosomal subunit;	GO:0003723:RNA binding;GO:0003735:structural constituent of ribosome;	K02877
ENSMUSG00000045954	2205.4	1.79455	0.0600299	29.8942	2.34e-196	4.83e-194	1	51289126	51302960	+	Sdpr	serum deprivation response [Source:MGI Symbol%3BAcc:MGI:99513]	-	-	-	-
ENSMUSG00000070372	2210.64	-1.49145	0.0499802	-29.8408	1.15e-195	2.35e-193	3	104822779	104864505	-	Capza1	capping protein (actin filament) muscle Z-line%2C alpha 1 [Source:MGI Symbol%3BAcc:MGI:106227]	GO:0051016:barbed-end actin filament capping;	GO:0005903:brush border;GO:0005911:cell-cell junction;GO:0008290:F-actin capping protein complex;GO:0016020:membrane;GO:0030863:cortical cytoskeleton;GO:0070062:extracellular exosome;GO:0071203:WASH complex;	GO:0005515:protein binding;GO:0045296:cadherin binding;GO:0051015:actin filament binding;	K10364
ENSMUSG00000089715	5170.64	1.19789	0.040167	29.8228	1.98e-195	3.99e-193	15	79823896	79834688	-	Cbx6	chromobox 6 [Source:MGI Symbol%3BAcc:MGI:3512628]	GO:0000122:negative regulation of transcription from RNA polymerase II promoter;GO:0006351:transcription, DNA-templated;GO:0016569:covalent chromatin modification;	GO:0000792:heterochromatin;GO:0005634:nucleus;GO:0031519:PcG protein complex;	GO:0003727:single-stranded RNA binding;	K11455;K11453
ENSMUSG00000032232	937.266	-2.20535	0.0739616	-29.8175	2.32e-195	4.63e-193	9	71626509	71771602	-	Cgnl1	cingulin-like 1 [Source:MGI Symbol%3BAcc:MGI:1915428]	GO:0008150:biological_process;	GO:0005923:bicellular tight junction;GO:0015629:actin cytoskeleton;GO:0016459:myosin complex;GO:0043296:apical junction complex;	GO:0003674:molecular_function;GO:0003774:motor activity;	K21110
ENSMUSG00000031659	565.15	-3.20337	0.107478	-29.8049	3.37e-195	6.66e-193	8	88272403	88329962	+	Adcy7	adenylate cyclase 7 [Source:MGI Symbol%3BAcc:MGI:102891]	GO:0006171:cAMP biosynthetic process;GO:0006182:cGMP biosynthetic process;GO:0007165:signal transduction;GO:0007190:activation of adenylate cyclase activity;GO:0030819:positive regulation of cAMP biosynthetic process;GO:0035556:intracellular signal transduction;GO:0060135:maternal process involved in female pregnancy;GO:0071361:cellular response to ethanol;	GO:0005886:plasma membrane;GO:0008074:guanylate cyclase complex, soluble;GO:0016021:integral component of membrane;	GO:0004016:adenylate cyclase activity;GO:0004383:guanylate cyclase activity;GO:0005524:ATP binding;GO:0046872:metal ion binding;	K08047
ENSMUSG00000034394	1426.32	-1.76145	0.0593879	-29.6601	2.52e-193	4.92e-191	11	4257557	4272514	+	Lif	leukemia inhibitory factor [Source:MGI Symbol%3BAcc:MGI:96787]	GO:0001974:blood vessel remodeling;GO:0006955:immune response;GO:0007260:tyrosine phosphorylation of STAT protein;GO:0007566:embryo implantation;GO:0008284:positive regulation of cell proliferation;GO:0008285:negative regulation of cell proliferation;GO:0010628:positive regulation of gene expression;GO:0019827:stem cell maintenance;GO:0030324:lung development;GO:0033138:positive regulation of pep…	GO:0005615:extracellular space;GO:0005829:cytosol;	GO:0001135:RNA polymerase II transcription factor recruiting transcription factor activity;GO:0005102:receptor binding;GO:0005125:cytokine activity;GO:0005146:leukemia inhibitory factor receptor binding;GO:0008083:growth factor activity;	K05419
ENSMUSG00000019997	4864.49	3.05941	0.104161	29.3719	1.26e-189	2.43e-187	10	24595442	24598683	+	Ctgf	connective tissue growth factor [Source:MGI Symbol%3BAcc:MGI:95537]	GO:0001502:cartilage condensation;GO:0001503:ossification;GO:0001525:angiogenesis;GO:0001558:regulation of cell growth;GO:0001894:tissue homeostasis;GO:0007160:cell-matrix adhesion;GO:0007229:integrin-mediated signaling pathway;GO:0007267:cell-cell signaling;GO:0007568:aging;GO:0008284:positive regulation of cell proliferation;GO:0008543:fibroblast growth factor receptor signaling pathway;GO:0009…	GO:0005576:extracellular region;GO:0005578:proteinaceous extracellular matrix;GO:0005615:extracellular space;GO:0005794:Golgi apparatus;GO:0005801:cis-Golgi network;GO:0005829:cytosol;GO:0005938:cell cortex;GO:0043231:intracellular membrane-bounded organelle;GO:0048471:perinuclear region of cytoplasm;	GO:0001968:fibronectin binding;GO:0005178:integrin binding;GO:0005520:insulin-like growth factor binding;GO:0008022:protein C-terminus binding;GO:0008083:growth factor activity;GO:0008201:heparin binding;	-
ENSMUSG00000064339	71852.3	1.26547	0.0430905	29.3678	1.42e-189	2.71e-187	MT	1094	2675	+	mt-Rnr2	mitochondrially encoded 16S rRNA [Source:MGI Symbol%3BAcc:MGI:102492]	-	-	-	-
ENSMUSG00000024070	1353.39	-1.87238	0.0638068	-29.3445	2.81e-189	5.33e-187	17	78949405	79020816	-	Prkd3	protein kinase D3 [Source:MGI Symbol%3BAcc:MGI:1922542]	GO:0006468:protein phosphorylation;GO:0089700:protein kinase D signaling;	GO:0005654:nucleoplasm;GO:0005829:cytosol;GO:0016020:membrane;	GO:0004697:protein kinase C activity;GO:0005524:ATP binding;GO:0016301:kinase activity;GO:0046872:metal ion binding;	K06070
ENSMUSG00000004626	550.33	-2.87944	0.0985521	-29.2175	1.16e-187	2.19e-185	8	3630955	3643644	+	Stxbp2	syntaxin binding protein 2 [Source:MGI Symbol%3BAcc:MGI:107370]	GO:0001909:leukocyte mediated cytotoxicity;GO:0006887:exocytosis;GO:0006904:vesicle docking involved in exocytosis;GO:0015031:protein transport;GO:0043312:neutrophil degranulation;	GO:0005829:cytosol;GO:0005886:plasma membrane;GO:0016324:apical plasma membrane;GO:0031201:SNARE complex;GO:0042581:specific granule;GO:0042582:azurophil granule;GO:0042589:zymogen granule membrane;GO:0044194:cytolytic granule;GO:0070062:extracellular exosome;GO:0070820:tertiary granule;	GO:0005515:protein binding;GO:0017075:syntaxin-1 binding;GO:0019905:syntaxin binding;GO:0030348:syntaxin-3 binding;	K15300
ENSMUSG00000028551	857.704	-2.19736	0.0752811	-29.1888	2.69e-187	5.01e-185	4	109660876	109667189	-	Cdkn2c	cyclin-dependent kinase inhibitor 2C (p18%2C inhibits CDK4) [Source:MGI Symbol%3BAcc:MGI:105388]	GO:0000079:regulation of cyclin-dependent protein serine/threonine kinase activity;GO:0000082:G1/S transition of mitotic cell cycle;GO:0007050:cell cycle arrest;GO:0008285:negative regulation of cell proliferation;GO:0030308:negative regulation of cell growth;GO:0042326:negative regulation of phosphorylation;GO:0045736:negative regulation of cyclin-dependent protein serine/threonine kinase activi…	GO:0005634:nucleus;GO:0005737:cytoplasm;	GO:0004861:cyclin-dependent protein serine/threonine kinase inhibitor activity;GO:0019901:protein kinase binding;	K06622
ENSMUSG00000031930	1536.56	-1.66276	0.0570379	-29.1518	7.92e-187	1.46e-184	8	107436365	107558595	+	Wwp2	WW domain containing E3 ubiquitin protein ligase 2 [Source:MGI Symbol%3BAcc:MGI:1914144]	GO:0000122:negative regulation of transcription from RNA polymerase II promoter;GO:0006366:transcription from RNA polymerase II promoter;GO:0010629:negative regulation of gene expression;GO:0016567:protein ubiquitination;GO:0032410:negative regulation of transporter activity;GO:0034765:regulation of ion transmembrane transport;GO:0042391:regulation of membrane potential;GO:0042787:protein ubiquit…	GO:0005634:nucleus;GO:0005737:cytoplasm;GO:0016020:membrane;GO:0070062:extracellular exosome;	GO:0001085:RNA polymerase II transcription factor binding;GO:0001190:RNA polymerase II transcription factor binding transcription factor activity involved in positive regulation of transcription;GO:0004842:ubiquitin-protein transferase activity;GO:0005515:protein binding;GO:0008134:transcription factor binding;GO:0061630:ubiquitin protein ligase activity;	K05630;K05633;K10592
ENSMUSG00000030220	1358.59	-1.83811	0.0633646	-29.0085	5.14e-185	9.38e-183	6	136923655	136941899	-	Arhgdib	Rho%2C GDP dissociation inhibitor (GDI) beta [Source:MGI Symbol%3BAcc:MGI:101940]	GO:0035023:regulation of Rho protein signal transduction;GO:0043547:positive regulation of GTPase activity;GO:0071461:cellular response to redox state;GO:1901164:negative regulation of trophoblast cell migration;GO:2000249:regulation of actin cytoskeleton reorganization;	GO:0005829:cytosol;GO:0016020:membrane;GO:0070062:extracellular exosome;	GO:0003924:GTPase activity;GO:0005094:Rho GDP-dissociation inhibitor activity;GO:0005096:GTPase activator activity;GO:0048365:Rac GTPase binding;	K12462
ENSMUSG00000021684	393.682	4.74379	0.164175	28.8946	1.4e-183	2.52e-181	13	95024454	95250336	-	Pde8b	phosphodiesterase 8B [Source:MGI Symbol%3BAcc:MGI:2443999]	GO:0001662:behavioral fear response;GO:0006198:cAMP catabolic process;GO:0007165:signal transduction;GO:0008542:visual learning;GO:0035106:operant conditioning;GO:0050885:neuromuscular process controlling balance;GO:0090032:negative regulation of steroid hormone biosynthetic process;	GO:0005575:cellular_component;	GO:0004115:3',5'-cyclic-AMP phosphodiesterase activity;GO:0046872:metal ion binding;	K18437;K01120
ENSMUSG00000042834	501.683	6.33873	0.219741	28.8464	5.63e-183	1.01e-180	18	33437019	33464029	-	Nrep	neuronal regeneration related protein [Source:MGI Symbol%3BAcc:MGI:99444]	GO:0017015:regulation of transforming growth factor beta receptor signaling pathway;GO:0031103:axon regeneration;GO:0045664:regulation of neuron differentiation;	GO:0005634:nucleus;GO:0005737:cytoplasm;	GO:0005515:protein binding;	-
ENSMUSG00000055322	616.878	2.67784	0.0929156	28.8201	1.2e-182	2.13e-180	1	73910231	74124449	-	Tns1	tensin 1 [Source:MGI Symbol%3BAcc:MGI:104552]	GO:0007044:cell-substrate junction assembly;GO:0010761:fibroblast migration;GO:0035556:intracellular signal transduction;	GO:0005622:intracellular;GO:0005925:focal adhesion;GO:0030055:cell-substrate junction;	GO:0003723:RNA binding;GO:0003779:actin binding;	K18080
ENSMUSG00000090958	376.77	4.20921	0.146118	28.8068	1.76e-182	3.1e-180	7	98489283	98502181	+	Lrrc32	leucine rich repeat containing 32 [Source:MGI Symbol%3BAcc:MGI:93882]	GO:0010628:positive regulation of gene expression;GO:0046007:negative regulation of activated T cell proliferation;GO:0050710:negative regulation of cytokine secretion;	GO:0005887:integral component of plasma membrane;	-	-
ENSMUSG00000056427	796.897	-2.16455	0.0753749	-28.7171	2.33e-181	4.06e-179	11	35121224	35708507	+	Slit3	slit homolog 3 (Drosophila) [Source:MGI Symbol%3BAcc:MGI:1315202]	GO:0007411:axon guidance;GO:0008285:negative regulation of cell proliferation;GO:0009887:organ morphogenesis;GO:0010629:negative regulation of gene expression;GO:0030308:negative regulation of cell growth;GO:0032870:cellular response to hormone stimulus;GO:0035385:Roundabout signaling pathway;GO:0048846:axon extension involved in axon guidance;GO:0050919:negative chemotaxis;GO:0051414:response to…	GO:0005615:extracellular space;	GO:0005102:receptor binding;GO:0005509:calcium ion binding;GO:0048495:Roundabout binding;	K06850
ENSMUSG00000029287	1240.78	-1.85753	0.0651454	-28.5136	7.95e-179	1.37e-176	5	107106570	107289629	-	Tgfbr3	transforming growth factor%2C beta receptor III [Source:MGI Symbol%3BAcc:MGI:104637]	GO:0001568:blood vessel development;GO:0001570:vasculogenesis;GO:0001649:osteoblast differentiation;GO:0001701:in utero embryonic development;GO:0001824:blastocyst development;GO:0001837:epithelial to mesenchymal transition;GO:0001889:liver development;GO:0001974:blood vessel remodeling;GO:0003150:muscular septum morphogenesis;GO:0003151:outflow tract morphogenesis;GO:0003223:ventricular compact …	GO:0005578:proteinaceous extracellular matrix;GO:0005615:extracellular space;GO:0005737:cytoplasm;GO:0005783:endoplasmic reticulum;GO:0005887:integral component of plasma membrane;GO:0009897:external side of plasma membrane;GO:0009986:cell surface;GO:0034673:inhibin-betaglycan-ActRII complex;GO:0043235:receptor complex;GO:0070062:extracellular exosome;	GO:0005024:transforming growth factor beta-activated receptor activity;GO:0005114:type II transforming growth factor beta receptor binding;GO:0005515:protein binding;GO:0005539:glycosaminoglycan binding;GO:0015026:coreceptor activity;GO:0030165:PDZ domain binding;GO:0046332:SMAD binding;GO:0050431:transforming growth factor beta binding;GO:0070123:transforming growth factor beta receptor activity…	-
ENSMUSG00000021477	25200.5	-1.19906	0.0422582	-28.3745	4.17e-177	7.14e-175	13	64359337	64370890	-	Ctsl	cathepsin L [Source:MGI Symbol%3BAcc:MGI:88564]	GO:0006508:proteolysis;GO:0007154:cell communication;GO:0007283:spermatogenesis;GO:0008584:male gonad development;GO:0009267:cellular response to starvation;GO:0009749:response to glucose;GO:0010259:multicellular organismal aging;GO:0010839:negative regulation of keratinocyte proliferation;GO:0014070:response to organic cyclic compound;GO:0016485:protein processing;GO:0016540:protein autoprocessi…	GO:0005615:extracellular space;GO:0005634:nucleus;GO:0005730:nucleolus;GO:0005737:cytoplasm;GO:0005764:lysosome;GO:0005773:vacuole;GO:0005902:microvillus;GO:0009897:external side of plasma membrane;GO:0030141:secretory granule;GO:0031410:cytoplasmic vesicle;GO:0043005:neuron projection;GO:0043204:perikaryon;GO:0045177:apical part of cell;GO:0070062:extracellular exosome;	GO:0004177:aminopeptidase activity;GO:0004197:cysteine-type endopeptidase activity;GO:0005515:protein binding;GO:0016807:cysteine-type carboxypeptidase activity;GO:0042277:peptide binding;GO:0042393:histone binding;	K01365
ENSMUSG00000030654	1142.94	1.80485	0.0645104	27.9777	3.04e-172	5.15e-170	7	118118891	118129662	-	Arl6ip1	ADP-ribosylation factor-like 6 interacting protein 1 [Source:MGI Symbol%3BAcc:MGI:1858943]	GO:0002038:positive regulation of L-glutamate transport;GO:0006613:cotranslational protein targeting to membrane;GO:0006915:apoptotic process;GO:0043066:negative regulation of apoptotic process;GO:0043154:negative regulation of cysteine-type endopeptidase activity involved in apoptotic process;GO:0071787:endoplasmic reticulum tubular network assembly;	GO:0005737:cytoplasm;GO:0005783:endoplasmic reticulum;GO:0005784:Sec61 translocon complex;GO:0005789:endoplasmic reticulum membrane;GO:0005829:cytosol;GO:0016020:membrane;GO:0016021:integral component of membrane;GO:0030176:integral component of endoplasmic reticulum membrane;	GO:0005515:protein binding;GO:0042802:identical protein binding;	-
ENSMUSG00000025137	413.11	-3.78173	0.135562	-27.8966	2.93e-171	4.93e-169	11	120610087	120617936	-	Pcyt2	phosphate cytidylyltransferase 2%2C ethanolamine [Source:MGI Symbol%3BAcc:MGI:1915921]	GO:0006646:phosphatidylethanolamine biosynthetic process;	-	GO:0004306:ethanolamine-phosphate cytidylyltransferase activity;	K00980;K00967
ENSMUSG00000025348	425.467	3.08123	0.110724	27.828	1.99e-170	3.32e-168	10	128933818	128958282	+	Itga7	integrin alpha 7 [Source:MGI Symbol%3BAcc:MGI:102700]	GO:0007155:cell adhesion;GO:0007229:integrin-mediated signaling pathway;GO:0008360:regulation of cell shape;GO:0016477:cell migration;GO:0034113:heterotypic cell-cell adhesion;GO:0048514:blood vessel morphogenesis;	GO:0005737:cytoplasm;GO:0005927:muscle tendon junction;GO:0031594:neuromuscular junction;GO:0034677:integrin alpha7-beta1 complex;GO:0042383:sarcolemma;	GO:0005515:protein binding;GO:0043236:laminin binding;GO:0046872:metal ion binding;	K06583
ENSMUSG00000033732	8760.91	-1.22474	0.0441823	-27.72	4e-169	6.62e-167	8	110810239	110846787	-	Sf3b3	splicing factor 3b%2C subunit 3 [Source:MGI Symbol%3BAcc:MGI:1289341]	GO:0000398:mRNA splicing, via spliceosome;GO:0042177:negative regulation of protein catabolic process;	GO:0005634:nucleus;GO:0005689:U12-type spliceosomal complex;GO:0005730:nucleolus;GO:0071013:catalytic step 2 spliceosome;	GO:0003723:RNA binding;GO:0032403:protein complex binding;	K12830
ENSMUSG00000031586	397.254	-4.62244	0.167029	-27.6745	1.42e-168	2.32e-166	8	33782643	33929863	-	Rbpms	RNA binding protein gene with multiple splicing [Source:MGI Symbol%3BAcc:MGI:1334446]	GO:0000398:mRNA splicing, via spliceosome;GO:0006351:transcription, DNA-templated;GO:0006355:regulation of transcription, DNA-templated;GO:0006979:response to oxidative stress;GO:0010862:positive regulation of pathway-restricted SMAD protein phosphorylation;GO:0060391:positive regulation of SMAD protein import into nucleus;	GO:0000932:cytoplasmic mRNA processing body;GO:0005654:nucleoplasm;GO:0005685:U1 snRNP;GO:0005829:cytosol;GO:0010494:cytoplasmic stress granule;	GO:0003713:transcription coactivator activity;GO:0003723:RNA binding;GO:0008143:poly(A) binding;GO:0030619:U1 snRNA binding;GO:0035614:snRNA stem-loop binding;GO:0042803:protein homodimerization activity;	-
ENSMUSG00000031447	19942.7	-1.01769	0.0367922	-27.6605	2.09e-168	3.39e-166	8	13159161	13175338	+	Lamp1	lysosomal-associated membrane protein 1 [Source:MGI Symbol%3BAcc:MGI:96745]	GO:0007283:spermatogenesis;GO:0008626:granzyme-mediated apoptotic signaling pathway;GO:0043323:positive regulation of natural killer cell degranulation;GO:0045954:positive regulation of natural killer cell mediated cytotoxicity;GO:0048102:autophagic cell death;GO:0050821:protein stabilization;GO:0072594:establishment of protein localization to organelle;GO:0090160:Golgi to lysosome transport;GO:1…	GO:0005737:cytoplasm;GO:0005764:lysosome;GO:0005768:endosome;GO:0005770:late endosome;GO:0005771:multivesicular body;GO:0005829:cytosol;GO:0005886:plasma membrane;GO:0008021:synaptic vesicle;GO:0009897:external side of plasma membrane;GO:0009986:cell surface;GO:0010008:endosome membrane;GO:0016020:membrane;GO:0016021:integral component of membrane;GO:0030425:dendrite;GO:0031982:vesicle;GO:0042383…	GO:0005515:protein binding;GO:0019899:enzyme binding;GO:0019904:protein domain specific binding;	K06528
ENSMUSG00000027962	3326.11	-1.18115	0.0429125	-27.5247	8.89e-167	1.43e-164	3	116109949	116129688	-	Vcam1	vascular cell adhesion molecule 1 [Source:MGI Symbol%3BAcc:MGI:98926]	GO:0007155:cell adhesion;GO:0007157:heterophilic cell-cell adhesion via plasma membrane cell adhesion molecules;GO:0007159:leukocyte cell-cell adhesion;GO:0007160:cell-matrix adhesion;GO:0007507:heart development;GO:0009308:amine metabolic process;GO:0016032:viral process;GO:0035584:calcium-mediated signaling using intracellular calcium source;GO:0042102:positive regulation of T cell proliferatio…	GO:0002102:podosome;GO:0005615:extracellular space;GO:0005769:early endosome;GO:0005783:endoplasmic reticulum;GO:0005794:Golgi apparatus;GO:0005902:microvillus;GO:0009897:external side of plasma membrane;GO:0009986:cell surface;GO:0016021:integral component of membrane;GO:0030175:filopodium;GO:0031225:anchored component of membrane;GO:0045177:apical part of cell;GO:0070062:extracellular exosome;G…	GO:0005178:integrin binding;GO:0008131:primary amine oxidase activity;GO:0050839:cell adhesion molecule binding;	-
ENSMUSG00000026728	28857.9	1.08558	0.0394593	27.5113	1.29e-166	2.05e-164	2	13573927	13582826	+	Vim	vimentin [Source:MGI Symbol%3BAcc:MGI:98932]	GO:0010628:positive regulation of gene expression;GO:0010977:negative regulation of neuron projection development;GO:0014002:astrocyte development;GO:0045103:intermediate filament-based process;GO:0045109:intermediate filament organization;GO:0060020:Bergmann glial cell differentiation;GO:0060395:SMAD protein signal transduction;GO:0070307:lens fiber cell development;	GO:0005737:cytoplasm;GO:0005777:peroxisome;GO:0005829:cytosol;GO:0005856:cytoskeleton;GO:0005882:intermediate filament;GO:0005886:plasma membrane;GO:0005925:focal adhesion;GO:0031012:extracellular matrix;GO:0031252:cell leading edge;GO:0042995:cell projection;GO:0043005:neuron projection;GO:0045098:type III intermediate filament;GO:0070062:extracellular exosome;	GO:0001948:glycoprotein binding;GO:0003725:double-stranded RNA binding;GO:0005198:structural molecule activity;GO:0005200:structural constituent of cytoskeleton;GO:0005212:structural constituent of eye lens;GO:0005515:protein binding;GO:0008022:protein C-terminus binding;GO:0042802:identical protein binding;GO:0097110:scaffold protein binding;GO:1990254:keratin filament binding;	K07606
ENSMUSG00000024521	354.515	5.42381	0.199233	27.2235	3.42e-163	5.43e-161	18	66458604	66465550	+	Pmaip1	phorbol-12-myristate-13-acetate-induced protein 1 [Source:MGI Symbol%3BAcc:MGI:1930146]	GO:0001836:release of cytochrome c from mitochondria;GO:0006915:apoptotic process;GO:0006919:activation of cysteine-type endopeptidase activity involved in apoptotic process;GO:0006974:cellular response to DNA damage stimulus;GO:0008630:intrinsic apoptotic signaling pathway in response to DNA damage;GO:0009411:response to UV;GO:0010165:response to X-ray;GO:0010917:negative regulation of mitochond…	GO:0005739:mitochondrion;	GO:0005515:protein binding;	K10131
ENSMUSG00000024782	1018.81	1.78623	0.0656694	27.2003	6.44e-163	1.01e-160	19	29020833	29047961	-	Ak3	adenylate kinase 3 [Source:MGI Symbol%3BAcc:MGI:1860835]	GO:0046033:AMP metabolic process;GO:0046039:GTP metabolic process;GO:0046041:ITP metabolic process;GO:0046051:UTP metabolic process;GO:0046939:nucleotide phosphorylation;	GO:0005739:mitochondrion;GO:0005759:mitochondrial matrix;	GO:0004017:adenylate kinase activity;GO:0005524:ATP binding;GO:0005525:GTP binding;GO:0046899:nucleoside triphosphate adenylate kinase activity;	K00944
ENSMUSG00000021070	645.263	-7.04912	0.259229	-27.1926	7.94e-163	1.24e-160	12	105563226	105595237	+	Bdkrb2	bradykinin receptor%2C beta 2 [Source:MGI Symbol%3BAcc:MGI:102845]	GO:0006939:smooth muscle contraction;GO:0007186:G-protein coupled receptor signaling pathway;GO:0009651:response to salt stress;GO:0033137:negative regulation of peptidyl-serine phosphorylation;GO:0042310:vasoconstriction;GO:0042311:vasodilation;GO:0050482:arachidonic acid secretion;GO:1902219:negative regulation of intrinsic apoptotic signaling pathway in response to osmotic stress;GO:1902239:ne…	GO:0005768:endosome;GO:0005886:plasma membrane;GO:0016021:integral component of membrane;	GO:0002020:protease binding;GO:0004947:bradykinin receptor activity;GO:0031702:type 1 angiotensin receptor binding;GO:0046982:protein heterodimerization activity;	K03916
ENSMUSG00000064337	12882.4	1.13057	0.0415886	27.1845	9.9e-163	1.53e-160	MT	70	1024	+	mt-Rnr1	mitochondrially encoded 12S rRNA [Source:MGI Symbol%3BAcc:MGI:102493]	-	-	-	-
ENSMUSG00000031353	7666.79	1.1677	0.0432194	27.0178	9.12e-161	1.4e-158	X	162760402	162779092	+	Rbbp7	retinoblastoma binding protein 7%2C chromatin remodeling factor [Source:MGI Symbol%3BAcc:MGI:1194910]	GO:0000122:negative regulation of transcription from RNA polymerase II promoter;GO:0000183:chromatin silencing at rDNA;GO:0006260:DNA replication;GO:0006338:chromatin remodeling;GO:0006351:transcription, DNA-templated;GO:0016569:covalent chromatin modification;GO:0030308:negative regulation of cell growth;GO:0045892:negative regulation of transcription, DNA-templated;GO:0048545:response to steroi…	GO:0005634:nucleus;GO:0005654:nucleoplasm;GO:0005829:cytosol;GO:0016581:NuRD complex;GO:0035098:ESC/E(Z) complex;	GO:0003723:RNA binding;GO:0005515:protein binding;	K10752
ENSMUSG00000026620	568.6	-2.48913	0.092727	-26.8436	1e-158	1.52e-156	1	184896789	184999570	-	Mark1	MAP/microtubule affinity regulating kinase 1 [Source:MGI Symbol%3BAcc:MGI:2664902]	GO:0000226:microtubule cytoskeleton organization;GO:0001764:neuron migration;GO:0006468:protein phosphorylation;GO:0016055:Wnt signaling pathway;GO:0030010:establishment of cell polarity;GO:0035556:intracellular signal transduction;	GO:0005737:cytoplasm;GO:0005856:cytoskeleton;GO:0005886:plasma membrane;	GO:0000287:magnesium ion binding;GO:0001786:phosphatidylserine binding;GO:0004674:protein serine/threonine kinase activity;GO:0005524:ATP binding;GO:0005546:phosphatidylinositol-4,5-bisphosphate binding;GO:0050321:tau-protein kinase activity;GO:0070300:phosphatidic acid binding;	K08798;K12132
ENSMUSG00000022484	438.351	-3.00146	0.112194	-26.7523	1.16e-157	1.75e-155	15	102966796	102971893	+	Hoxc10	homeobox C10 [Source:MGI Symbol%3BAcc:MGI:96192]	GO:0001501:skeletal system development;GO:0006366:transcription from RNA polymerase II promoter;GO:0009952:anterior/posterior pattern specification;GO:0009954:proximal/distal pattern formation;GO:0021520:spinal cord motor neuron cell fate specification;GO:0030326:embryonic limb morphogenesis;GO:0045944:positive regulation of transcription from RNA polymerase II promoter;GO:0050905:neuromuscular p…	GO:0016604:nuclear body;GO:0019907:cyclin-dependent protein kinase activating kinase holoenzyme complex;	GO:0000977:RNA polymerase II regulatory region sequence-specific DNA binding;GO:0001228:RNA polymerase II transcription regulatory region sequence-specific DNA binding transcription factor activity involved in positive regulation of transcription;	K17444
ENSMUSG00000060961	475.371	-6.11885	0.229333	-26.6811	7.8e-157	1.17e-154	5	88886818	89239653	+	Slc4a4	solute carrier family 4 (anion exchanger)%2C member 4 [Source:MGI Symbol%3BAcc:MGI:1927555]	GO:0006814:sodium ion transport;GO:0006885:regulation of pH;GO:0015698:inorganic anion transport;GO:0015701:bicarbonate transport;GO:0035725:sodium ion transmembrane transport;GO:0051453:regulation of intracellular pH;GO:0098656:anion transmembrane transport;	GO:0005887:integral component of plasma membrane;GO:0016323:basolateral plasma membrane;GO:0070062:extracellular exosome;	GO:0005452:inorganic anion exchanger activity;GO:0005515:protein binding;GO:0008510:sodium:bicarbonate symporter activity;	K13575;K13861
ENSMUSG00000035671	1056.62	-1.87882	0.0704865	-26.655	1.57e-156	2.33e-154	8	84210678	84237055	-	Zswim4	zinc finger SWIM-type containing 4 [Source:MGI Symbol%3BAcc:MGI:2443726]	GO:0008150:biological_process;	GO:0005575:cellular_component;	GO:0003674:molecular_function;GO:0008270:zinc ion binding;	-
ENSMUSG00000070056	685.08	-2.15991	0.0810817	-26.6386	2.42e-156	3.57e-154	8	35587798	35679449	+	Mfhas1	malignant fibrous histiocytoma amplified sequence 1 [Source:MGI Symbol%3BAcc:MGI:1098644]	GO:0007165:signal transduction;GO:0007264:small GTPase mediated signal transduction;	GO:0005575:cellular_component;GO:0005622:intracellular;GO:0005886:plasma membrane;	GO:0003674:molecular_function;GO:0005525:GTP binding;	-
ENSMUSG00000038296	411.886	2.8803	0.108514	26.543	3.09e-155	4.53e-153	7	111471661	111779977	-	Galnt18	UDP-N-acetyl-alpha-D-galactosamine:polypeptide N-acetylgalactosaminyltransferase 18 [Source:MGI Symbol%3BAcc:MGI:2446239]	GO:0006486:protein glycosylation;GO:0008150:biological_process;	GO:0000139:Golgi membrane;GO:0005575:cellular_component;GO:0016021:integral component of membrane;	GO:0003674:molecular_function;GO:0004653:polypeptide N-acetylgalactosaminyltransferase activity;GO:0030246:carbohydrate binding;GO:0046872:metal ion binding;	K00710
ENSMUSG00000039263	316.714	4.109	0.154894	26.5278	4.64e-155	6.73e-153	2	174110349	174123070	+	Npepl1	aminopeptidase-like 1 [Source:MGI Symbol%3BAcc:MGI:2448523]	GO:0006508:proteolysis;GO:0008150:biological_process;	GO:0005634:nucleus;GO:0005737:cytoplasm;	GO:0004177:aminopeptidase activity;GO:0008235:metalloexopeptidase activity;GO:0030145:manganese ion binding;	-
ENSMUSG00000021822	700.019	2.16222	0.0821416	26.323	1.04e-152	1.51e-150	14	20836662	20843388	+	Plau	plasminogen activator%2C urokinase [Source:MGI Symbol%3BAcc:MGI:97611]	GO:0001666:response to hypoxia;GO:0006508:proteolysis;GO:0010469:regulation of receptor activity;GO:0014909:smooth muscle cell migration;GO:0014910:regulation of smooth muscle cell migration;GO:0030335:positive regulation of cell migration;GO:0031639:plasminogen activation;GO:0033628:regulation of cell adhesion mediated by integrin;GO:0042127:regulation of cell proliferation;GO:0042730:fibrinolys…	GO:0005615:extracellular space;GO:0005925:focal adhesion;GO:0009986:cell surface;GO:0070062:extracellular exosome;	GO:0004252:serine-type endopeptidase activity;GO:0005515:protein binding;	K01348
ENSMUSG00000020027	297.947	4.18655	0.160853	26.0272	2.44e-149	3.49e-147	10	95385362	95417180	-	Socs2	suppressor of cytokine signaling 2 [Source:MGI Symbol%3BAcc:MGI:1201787]	GO:0001558:regulation of cell growth;GO:0006469:negative regulation of protein kinase activity;GO:0007595:lactation;GO:0016567:protein ubiquitination;GO:0019221:cytokine-mediated signaling pathway;GO:0032355:response to estradiol;GO:0032870:cellular response to hormone stimulus;GO:0035556:intracellular signal transduction;GO:0040014:regulation of multicellular organism growth;GO:0040015:negative …	GO:0005737:cytoplasm;	GO:0004860:protein kinase inhibitor activity;GO:0005131:growth hormone receptor binding;GO:0005159:insulin-like growth factor receptor binding;GO:0008269:JAK pathway signal transduction adaptor activity;	K04695
ENSMUSG00000047139	379.309	6.21203	0.23902	25.9896	6.5e-149	9.23e-147	10	43578284	43584265	+	Cd24a	CD24a antigen [Source:MGI Symbol%3BAcc:MGI:88323]	-	-	-	K06469
ENSMUSG00000034248	5128.23	-1.23149	0.0474931	-25.9298	3.07e-148	4.33e-146	14	69241848	69285112	-	Slc25a37	solute carrier family 25%2C member 37 [Source:MGI Symbol%3BAcc:MGI:1914962]	GO:0006839:mitochondrial transport;GO:0044281:small molecule metabolic process;GO:0048250:mitochondrial iron ion transport;GO:0055072:iron ion homeostasis;GO:1903874:ferrous iron transmembrane transport;	GO:0005739:mitochondrion;GO:0005743:mitochondrial inner membrane;GO:0016021:integral component of membrane;	GO:0005381:iron ion transmembrane transporter activity;GO:0015093:ferrous iron transmembrane transporter activity;	K15113
ENSMUSG00000028081	14643	-1.259	0.0485833	-25.9143	4.59e-148	6.43e-146	3	86137940	86142702	-	Rps3a1	ribosomal protein S3A1 [Source:MGI Symbol%3BAcc:MGI:1202063]	-	-	-	K02984
ENSMUSG00000022610	591.178	2.3982	0.0925531	25.9116	4.93e-148	6.85e-146	15	89130585	89140703	-	Mapk12	mitogen-activated protein kinase 12 [Source:MGI Symbol%3BAcc:MGI:1353438]	GO:0000165:MAPK cascade;GO:0006351:transcription, DNA-templated;GO:0006355:regulation of transcription, DNA-templated;GO:0007005:mitochondrion organization;GO:0007049:cell cycle;GO:0010468:regulation of gene expression;GO:0018105:peptidyl-serine phosphorylation;GO:0045445:myoblast differentiation;GO:0045786:negative regulation of cell cycle;	GO:0005634:nucleus;GO:0005654:nucleoplasm;GO:0005737:cytoplasm;GO:0005739:mitochondrion;	GO:0000287:magnesium ion binding;GO:0004674:protein serine/threonine kinase activity;GO:0004707:MAP kinase activity;GO:0005524:ATP binding;	K04441
ENSMUSG00000031960	15489.1	-1.00067	0.0386452	-25.8937	7.85e-148	1.08e-145	8	111033144	111057664	+	Aars	alanyl-tRNA synthetase [Source:MGI Symbol%3BAcc:MGI:2384560]	GO:0006400:tRNA modification;GO:0006419:alanyl-tRNA aminoacylation;GO:0006450:regulation of translational fidelity;GO:0021680:cerebellar Purkinje cell layer development;GO:0043524:negative regulation of neuron apoptotic process;GO:0050885:neuromuscular process controlling balance;GO:0050905:neuromuscular process;	GO:0005739:mitochondrion;GO:0005829:cytosol;GO:0016020:membrane;GO:0070062:extracellular exosome;	GO:0000049:tRNA binding;GO:0002161:aminoacyl-tRNA editing activity;GO:0004813:alanine-tRNA ligase activity;GO:0005515:protein binding;GO:0005524:ATP binding;GO:0016597:amino acid binding;GO:0046872:metal ion binding;	K01872
ENSMUSG00000031453	1665.54	-1.46571	0.0566397	-25.8777	1.19e-147	1.63e-145	8	13566948	13677603	-	Rasa3	RAS p21 protein activator 3 [Source:MGI Symbol%3BAcc:MGI:1197013]	GO:0034605:cellular response to heat;GO:0035556:intracellular signal transduction;GO:0043547:positive regulation of GTPase activity;GO:0046580:negative regulation of Ras protein signal transduction;GO:0051209:release of sequestered calcium ion into cytosol;	GO:0005737:cytoplasm;GO:0031235:intrinsic component of the cytoplasmic side of the plasma membrane;	GO:0005096:GTPase activator activity;GO:0015278:calcium-release channel activity;GO:0046872:metal ion binding;	K12380
ENSMUSG00000020866	424.134	-3.07625	0.118912	-25.87	1.45e-147	1.97e-145	11	94408391	94474198	-	Cacna1g	calcium channel%2C voltage-dependent%2C T type%2C alpha 1G subunit [Source:MGI Symbol%3BAcc:MGI:1201678]	GO:0001508:action potential;GO:0002027:regulation of heart rate;GO:0007268:synaptic transmission;GO:0010045:response to nickel cation;GO:0019228:neuronal action potential;GO:0034765:regulation of ion transmembrane transport;GO:0035725:sodium ion transmembrane transport;GO:0042391:regulation of membrane potential;GO:0045956:positive regulation of calcium ion-dependent exocytosis;GO:0060078:regulat…	GO:0005737:cytoplasm;GO:0005886:plasma membrane;GO:0005891:voltage-gated calcium channel complex;	GO:0005245:voltage-gated calcium channel activity;GO:0005248:voltage-gated sodium channel activity;GO:0005515:protein binding;GO:0008332:low voltage-gated calcium channel activity;GO:0086056:voltage-gated calcium channel activity involved in AV node cell action potential;GO:0086059:voltage-gated calcium channel activity involved SA node cell action potential;GO:0097110:scaffold protein binding;	K04854
ENSMUSG00000028883	1076.55	-1.66571	0.0644973	-25.826	4.53e-147	6.11e-145	5	13125414	13602565	+	Sema3a	sema domain%2C immunoglobulin domain (Ig)%2C short basic domain%2C secreted%2C (semaphorin) 3A [Source:MGI Symbol%3BAcc:MGI:107558]	GO:0001764:neuron migration;GO:0002027:regulation of heart rate;GO:0006915:apoptotic process;GO:0007411:axon guidance;GO:0007413:axonal fasciculation;GO:0008045:motor neuron axon guidance;GO:0010633:negative regulation of epithelial cell migration;GO:0010977:negative regulation of neuron projection development;GO:0021612:facial nerve structural organization;GO:0021637:trigeminal nerve structural …	GO:0005576:extracellular region;GO:0005615:extracellular space;GO:0030424:axon;GO:0030425:dendrite;	GO:0030215:semaphorin receptor binding;GO:0038191:neuropilin binding;GO:0045499:chemorepellent activity;	K06840
ENSMUSG00000025743	547.718	2.30028	0.0891008	25.8166	5.77e-147	7.74e-145	4	130792537	130826319	+	Sdc3	syndecan 3 [Source:MGI Symbol%3BAcc:MGI:1349163]	GO:0006024:glycosaminoglycan biosynthetic process;GO:0016477:cell migration;	GO:0005796:Golgi lumen;GO:0005886:plasma membrane;GO:0009986:cell surface;GO:0016020:membrane;GO:0016021:integral component of membrane;	-	K16337
ENSMUSG00000064080	13261.3	1.14093	0.0443442	25.7289	5.56e-146	7.4e-144	6	91212455	91272540	+	Fbln2	fibulin 2 [Source:MGI Symbol%3BAcc:MGI:95488]	GO:0010811:positive regulation of cell-substrate adhesion;	GO:0005578:proteinaceous extracellular matrix;GO:0005615:extracellular space;GO:0031012:extracellular matrix;GO:0070062:extracellular exosome;GO:1903561:extracellular vesicle;	GO:0005509:calcium ion binding;GO:0005515:protein binding;GO:0050840:extracellular matrix binding;	K17307
ENSMUSG00000000275	539.785	-6.91475	0.2691	-25.6958	1.3e-145	1.72e-143	11	88999376	89020293	+	Trim25	tripartite motif-containing 25 [Source:MGI Symbol%3BAcc:MGI:102749]	GO:0006513:protein monoubiquitination;GO:0030433:ER-associated ubiquitin-dependent protein catabolic process;GO:0033280:response to vitamin D;GO:0036503:ERAD pathway;GO:0042787:protein ubiquitination involved in ubiquitin-dependent protein catabolic process;GO:0043123:positive regulation of I-kappaB kinase/NF-kappaB signaling;GO:0043627:response to estrogen;GO:0045087:innate immune response;GO:00…	GO:0005654:nucleoplasm;GO:0005737:cytoplasm;GO:0005829:cytosol;GO:0016604:nuclear body;	GO:0003723:RNA binding;GO:0004842:ubiquitin-protein transferase activity;GO:0016874:ligase activity;GO:0045296:cadherin binding;GO:0046872:metal ion binding;GO:1904264:ubiquitin protein ligase activity involved in ERAD pathway;	K10652
ENSMUSG00000027071	613.523	2.22556	0.0869502	25.5958	1.7e-144	2.23e-142	2	84998583	85037462	-	P2rx3	purinergic receptor P2X%2C ligand-gated ion channel%2C 3 [Source:MGI Symbol%3BAcc:MGI:1097160]	GO:0001666:response to hypoxia;GO:0006811:ion transport;GO:0006812:cation transport;GO:0007268:synaptic transmission;GO:0007274:neuromuscular synaptic transmission;GO:0009266:response to temperature stimulus;GO:0009408:response to heat;GO:0009409:response to cold;GO:0009612:response to mechanical stimulus;GO:0009743:response to carbohydrate;GO:0010033:response to organic substance;GO:0014832:urin…	GO:0005639:integral component of nuclear inner membrane;GO:0005791:rough endoplasmic reticulum;GO:0005794:Golgi apparatus;GO:0005887:integral component of plasma membrane;GO:0030424:axon;GO:0043005:neuron projection;GO:0043025:neuronal cell body;GO:0043195:terminal bouton;GO:0043197:dendritic spine;GO:0043235:receptor complex;GO:0045121:membrane raft;	GO:0001614:purinergic nucleotide receptor activity;GO:0004931:extracellular ATP-gated cation channel activity;GO:0005524:ATP binding;	K05217
ENSMUSG00000032291	427.657	3.19793	0.125023	25.5786	2.64e-144	3.44e-142	9	54764748	54773110	+	Crabp1	cellular retinoic acid binding protein I [Source:MGI Symbol%3BAcc:MGI:88490]	GO:0006810:transport;GO:0034653:retinoic acid catabolic process;	GO:0005737:cytoplasm;GO:0005829:cytosol;	GO:0001972:retinoic acid binding;GO:0005215:transporter activity;GO:0005501:retinoid binding;GO:0016918:retinal binding;GO:0019841:retinol binding;	K17337
ENSMUSG00000003814	10078.4	-0.957429	0.0375529	-25.4954	2.21e-143	2.87e-141	8	84841850	84846934	-	Calr	calreticulin [Source:MGI Symbol%3BAcc:MGI:88252]	GO:0000122:negative regulation of transcription from RNA polymerase II promoter;GO:0002502:peptide antigen assembly with MHC class I protein complex;GO:0006611:protein export from nucleus;GO:0006898:receptor-mediated endocytosis;GO:0007283:spermatogenesis;GO:0008284:positive regulation of cell proliferation;GO:0010595:positive regulation of endothelial cell migration;GO:0010628:positive regulatio…	GO:0001669:acrosomal vesicle;GO:0005576:extracellular region;GO:0005615:extracellular space;GO:0005634:nucleus;GO:0005737:cytoplasm;GO:0005783:endoplasmic reticulum;GO:0005788:endoplasmic reticulum lumen;GO:0005790:smooth endoplasmic reticulum;GO:0005794:Golgi apparatus;GO:0005829:cytosol;GO:0005844:polysome;GO:0005925:focal adhesion;GO:0009897:external side of plasma membrane;GO:0016020:membrane…	GO:0001948:glycoprotein binding;GO:0003723:RNA binding;GO:0003729:mRNA binding;GO:0005178:integrin binding;GO:0005506:iron ion binding;GO:0005509:calcium ion binding;GO:0005515:protein binding;GO:0030246:carbohydrate binding;GO:0031625:ubiquitin protein ligase binding;GO:0042277:peptide binding;GO:0042562:hormone binding;GO:0050681:androgen receptor binding;GO:0051082:unfolded protein binding;	K08057
ENSMUSG00000068267	1805.85	-1.34572	0.0528166	-25.4791	3.36e-143	4.32e-141	2	131175182	131180067	-	Cenpb	centromere protein B [Source:MGI Symbol%3BAcc:MGI:88376]	-	GO:0000775:chromosome, centromeric region;GO:0000780:condensed nuclear chromosome, centromeric region;GO:0005694:chromosome;GO:0016604:nuclear body;GO:0031618:nuclear pericentric heterochromatin;	GO:0003682:chromatin binding;GO:0003696:satellite DNA binding;	K11496
ENSMUSG00000029528	2066.54	-1.29434	0.0509505	-25.404	2.28e-142	2.91e-140	5	115506676	115555987	+	Pxn	paxillin [Source:MGI Symbol%3BAcc:MGI:108295]	GO:0000187:activation of MAPK activity;GO:0007010:cytoskeleton organization;GO:0007179:transforming growth factor beta receptor signaling pathway;GO:0007229:integrin-mediated signaling pathway;GO:0008360:regulation of cell shape;GO:0018108:peptidyl-tyrosine phosphorylation;GO:0030032:lamellipodium assembly;GO:0034446:substrate adhesion-dependent cell spreading;GO:0045860:positive regulation of pr…	GO:0001725:stress fiber;GO:0005829:cytosol;GO:0005886:plasma membrane;GO:0005925:focal adhesion;GO:0005938:cell cortex;GO:0030027:lamellipodium;GO:0031252:cell leading edge;	GO:0005515:protein binding;GO:0008013:beta-catenin binding;GO:0017166:vinculin binding;GO:0030159:receptor signaling complex scaffold activity;GO:0046872:metal ion binding;GO:0051435:BH4 domain binding;	K05760
ENSMUSG00000020265	1757.94	-1.3942	0.0550104	-25.3442	1.04e-141	1.32e-139	10	77606097	77618331	+	Sumo3	small ubiquitin-like modifier 3 [Source:MGI Symbol%3BAcc:MGI:1336201]	GO:0016925:protein sumoylation;GO:0034504:protein localization to nucleus;GO:0043392:negative regulation of DNA binding;GO:2000060:positive regulation of protein ubiquitination involved in ubiquitin-dependent protein catabolic process;	GO:0005634:nucleus;GO:0005737:cytoplasm;GO:0016604:nuclear body;GO:0016605:PML body;GO:0070062:extracellular exosome;	GO:0019789:SUMO transferase activity;GO:0019899:enzyme binding;GO:0031386:protein tag;	K12160
ENSMUSG00000048218	346.467	-5.16242	0.204036	-25.3015	3.07e-141	3.88e-139	15	97244074	97247287	-	Amigo2	adhesion molecule with Ig like domain 2 [Source:MGI Symbol%3BAcc:MGI:2145995]	GO:0007155:cell adhesion;GO:0007156:homophilic cell adhesion via plasma membrane adhesion molecules;GO:0007157:heterophilic cell-cell adhesion via plasma membrane cell adhesion molecules;GO:0043066:negative regulation of apoptotic process;GO:0043069:negative regulation of programmed cell death;GO:0051965:positive regulation of synapse assembly;	GO:0005634:nucleus;GO:0005886:plasma membrane;GO:0016021:integral component of membrane;	GO:0003674:molecular_function;	-
ENSMUSG00000024043	425.508	-2.71028	0.107189	-25.285	4.67e-141	5.85e-139	17	67842713	68004120	-	Arhgap28	Rho GTPase activating protein 28 [Source:MGI Symbol%3BAcc:MGI:2147003]	GO:0007165:signal transduction;GO:0043547:positive regulation of GTPase activity;GO:0051497:negative regulation of stress fiber assembly;	-	GO:0005096:GTPase activator activity;	K20639
ENSMUSG00000022367	370.044	3.31923	0.131283	25.2829	4.92e-141	6.13e-139	15	56665627	56694539	-	Has2	hyaluronan synthase 2 [Source:MGI Symbol%3BAcc:MGI:107821]	GO:0001570:vasculogenesis;GO:0001822:kidney development;GO:0007155:cell adhesion;GO:0008284:positive regulation of cell proliferation;GO:0010838:positive regulation of keratinocyte proliferation;GO:0014911:positive regulation of smooth muscle cell migration;GO:0030212:hyaluronan metabolic process;GO:0030213:hyaluronan biosynthetic process;GO:0030335:positive regulation of cell migration;GO:003581…	GO:0005737:cytoplasm;GO:0005887:integral component of plasma membrane;	GO:0050501:hyaluronan synthase activity;	K00752
ENSMUSG00000044337	354.106	-3.35698	0.133019	-25.2368	1.58e-140	1.95e-138	1	90203980	90216751	+	Ackr3	atypical chemokine receptor 3 [Source:MGI Symbol%3BAcc:MGI:109562]	GO:0001525:angiogenesis;GO:0001570:vasculogenesis;GO:0006935:chemotaxis;GO:0007155:cell adhesion;GO:0007186:G-protein coupled receptor signaling pathway;GO:0031623:receptor internalization;GO:0070098:chemokine-mediated signaling pathway;GO:0070374:positive regulation of ERK1 and ERK2 cascade;GO:1902230:negative regulation of intrinsic apoptotic signaling pathway in response to DNA damage;	GO:0005634:nucleus;GO:0005768:endosome;GO:0005769:early endosome;GO:0005886:plasma membrane;GO:0005905:coated pit;GO:0009986:cell surface;GO:0016021:integral component of membrane;GO:0043231:intracellular membrane-bounded organelle;GO:0048471:perinuclear region of cytoplasm;GO:0055037:recycling endosome;	GO:0005044:scavenger receptor activity;GO:0015026:coreceptor activity;GO:0016494:C-X-C chemokine receptor activity;GO:0019958:C-X-C chemokine binding;	K04304
ENSMUSG00000059901	327.083	-3.89314	0.154444	-25.2074	3.32e-140	4.08e-138	10	61197112	61273438	-	Adamts14	a disintegrin-like and metallopeptidase (reprolysin type) with thrombospondin type 1 motif%2C 14 [Source:MGI Symbol%3BAcc:MGI:2179942]	GO:0006508:proteolysis;GO:0030199:collagen fibril organization;	GO:0005576:extracellular region;	GO:0004222:metalloendopeptidase activity;GO:0008233:peptidase activity;GO:0008270:zinc ion binding;	K08628
ENSMUSG00000063632	491.358	7.50844	0.298012	25.1951	4.54e-140	5.54e-138	12	27334264	27342574	-	Sox11	SRY (sex determining region Y)-box 11 [Source:MGI Symbol%3BAcc:MGI:98359]	GO:0000122:negative regulation of transcription from RNA polymerase II promoter;GO:0001501:skeletal system development;GO:0001822:kidney development;GO:0001841:neural tube formation;GO:0002089:lens morphogenesis in camera-type eye;GO:0003151:outflow tract morphogenesis;GO:0003211:cardiac ventricle formation;GO:0003357:noradrenergic neuron differentiation;GO:0006366:transcription from RNA polymera…	GO:0005634:nucleus;GO:0005737:cytoplasm;	GO:0000976:transcription regulatory region sequence-specific DNA binding;GO:0000979:RNA polymerase II core promoter sequence-specific DNA binding;GO:0001077:RNA polymerase II core promoter proximal region sequence-specific DNA binding transcription factor activity involved in positive regulation of transcription;GO:0001105:RNA polymerase II transcription coactivator activity;GO:0001158:enhancer s…	K09268
ENSMUSG00000016918	387.667	6.65873	0.264614	25.1639	9.95e-140	1.2e-137	1	12692277	12861192	+	Sulf1	sulfatase 1 [Source:MGI Symbol%3BAcc:MGI:2138563]	GO:0001502:cartilage condensation;GO:0001822:kidney development;GO:0001937:negative regulation of endothelial cell proliferation;GO:0002063:chondrocyte development;GO:0003094:glomerular filtration;GO:0006790:sulfur compound metabolic process;GO:0006915:apoptotic process;GO:0007155:cell adhesion;GO:0010575:positive regulation of vascular endothelial growth factor production;GO:0014846:esophagus sm…	GO:0005615:extracellular space;GO:0005783:endoplasmic reticulum;GO:0005794:Golgi apparatus;GO:0005795:Golgi stack;GO:0005886:plasma membrane;GO:0009986:cell surface;GO:0045121:membrane raft;	GO:0004065:arylsulfatase activity;GO:0005509:calcium ion binding;GO:0008449:N-acetylglucosamine-6-sulfatase activity;	K14607
ENSMUSG00000020427	522.449	7.73181	0.307259	25.1638	9.98e-140	1.2e-137	11	7206086	7213923	-	Igfbp3	insulin-like growth factor binding protein 3 [Source:MGI Symbol%3BAcc:MGI:96438]	GO:0001558:regulation of cell growth;GO:0001649:osteoblast differentiation;GO:0001933:negative regulation of protein phosphorylation;GO:0006468:protein phosphorylation;GO:0008285:negative regulation of cell proliferation;GO:0010906:regulation of glucose metabolic process;GO:0014912:negative regulation of smooth muscle cell migration;GO:0040008:regulation of growth;GO:0043065:positive regulation o…	GO:0005615:extracellular space;GO:0005634:nucleus;GO:0042567:insulin-like growth factor ternary complex;GO:0070062:extracellular exosome;	GO:0001968:fibronectin binding;GO:0005520:insulin-like growth factor binding;GO:0008160:protein tyrosine phosphatase activator activity;GO:0031994:insulin-like growth factor I binding;GO:0031995:insulin-like growth factor II binding;	K10138
ENSMUSG00000005873	2233.7	1.29569	0.0515129	25.1528	1.32e-139	1.58e-137	18	34344889	34373415	-	Reep5	receptor accessory protein 5 [Source:MGI Symbol%3BAcc:MGI:1270152]	GO:0008150:biological_process;	GO:0016021:integral component of membrane;GO:0070062:extracellular exosome;GO:0071782:endoplasmic reticulum tubular network;	GO:0005515:protein binding;	K17279
ENSMUSG00000048087	1922.59	1.24171	0.0493752	25.1485	1.47e-139	1.75e-137	16	46152985	46155077	-	Gm4737	predicted gene 4737 [Source:MGI Symbol%3BAcc:MGI:3643647]	-	-	-	K01251
ENSMUSG00000029672	1963.74	-1.29524	0.0515291	-25.1361	2e-139	2.37e-137	6	22306520	22356243	-	Fam3c	family with sequence similarity 3%2C member C [Source:MGI Symbol%3BAcc:MGI:107892]	GO:0007275:multicellular organismal development;GO:0008150:biological_process;	GO:0005615:extracellular space;GO:0031410:cytoplasmic vesicle;GO:0070062:extracellular exosome;	GO:0003674:molecular_function;	-
ENSMUSG00000029068	3118.47	-1.05228	0.0419717	-25.0711	1.03e-138	1.21e-136	4	155812489	155824543	+	Ccnl2	cyclin L2 [Source:MGI Symbol%3BAcc:MGI:1927119]	GO:0006351:transcription, DNA-templated;GO:0045737:positive regulation of cyclin-dependent protein serine/threonine kinase activity;GO:0045944:positive regulation of transcription from RNA polymerase II promoter;GO:1901409:positive regulation of phosphorylation of RNA polymerase II C-terminal domain;	GO:0000307:cyclin-dependent protein kinase holoenzyme complex;GO:0005634:nucleus;GO:0005654:nucleoplasm;GO:0016607:nuclear speck;GO:0043231:intracellular membrane-bounded organelle;	GO:0005515:protein binding;GO:0016538:cyclin-dependent protein serine/threonine kinase regulator activity;GO:0019901:protein kinase binding;	-
ENSMUSG00000053113	1094.5	-1.7619	0.0710005	-24.8153	6.12e-136	7.16e-134	11	117966079	117970047	-	Socs3	suppressor of cytokine signaling 3 [Source:MGI Symbol%3BAcc:MGI:1201791]	GO:0001932:regulation of protein phosphorylation;GO:0006469:negative regulation of protein kinase activity;GO:0009968:negative regulation of signal transduction;GO:0016567:protein ubiquitination;GO:0019221:cytokine-mediated signaling pathway;GO:0040008:regulation of growth;GO:0042532:negative regulation of tyrosine phosphorylation of STAT protein;GO:0043066:negative regulation of apoptotic proces…	GO:0005737:cytoplasm;GO:0005829:cytosol;	GO:0001784:phosphotyrosine binding;GO:0004860:protein kinase inhibitor activity;GO:0005515:protein binding;	K04696
ENSMUSG00000037458	5510.62	1.14667	0.0463587	24.7347	4.53e-135	5.27e-133	15	38487430	38519266	-	Azin1	antizyme inhibitor 1 [Source:MGI Symbol%3BAcc:MGI:1859169]	GO:0006595:polyamine metabolic process;GO:0033387:putrescine biosynthetic process from ornithine;GO:0042177:negative regulation of protein catabolic process;GO:0043085:positive regulation of catalytic activity;GO:1902269:positive regulation of polyamine transmembrane transport;	GO:0005634:nucleus;GO:0005737:cytoplasm;	GO:0003824:catalytic activity;GO:0042978:ornithine decarboxylase activator activity;	-
ENSMUSG00000041438	3696.07	-1.18384	0.047908	-24.7107	8.21e-135	9.49e-133	8	106893636	106923088	+	Utp4	UTP4 small subunit processome component [Source:MGI Symbol%3BAcc:MGI:1096573]	GO:0006351:transcription, DNA-templated;GO:0006355:regulation of transcription, DNA-templated;GO:0030490:maturation of SSU-rRNA;	GO:0001650:fibrillar center;GO:0005694:chromosome;GO:0005730:nucleolus;GO:0034455:t-UTP complex;	GO:0003723:RNA binding;	K14548
ENSMUSG00000037993	2372.43	-1.17004	0.0474912	-24.6371	5.06e-134	5.81e-132	8	109548011	109565861	-	Dhx38	DEAH (Asp-Glu-Ala-His) box polypeptide 38 [Source:MGI Symbol%3BAcc:MGI:1927617]	GO:0000398:mRNA splicing, via spliceosome;	GO:0005681:spliceosomal complex;GO:0005737:cytoplasm;GO:0016020:membrane;GO:0071013:catalytic step 2 spliceosome;	GO:0003723:RNA binding;GO:0004004:ATP-dependent RNA helicase activity;GO:0005524:ATP binding;	K12815
ENSMUSG00000050148	1460.14	1.46456	0.0597229	24.5225	8.5e-133	9.7e-131	X	153498227	153501570	+	Ubqln2	ubiquilin 2 [Source:MGI Symbol%3BAcc:MGI:1860283]	GO:0006914:autophagy;GO:0016241:regulation of macroautophagy;GO:0030433:ER-associated ubiquitin-dependent protein catabolic process;GO:1900186:negative regulation of clathrin-mediated endocytosis;GO:1903071:positive regulation of ER-associated ubiquitin-dependent protein catabolic process;GO:1904021:negative regulation of G-protein coupled receptor internalization;GO:2000785:regulation of autopha…	GO:0005634:nucleus;GO:0005737:cytoplasm;GO:0005776:autophagosome;GO:0005829:cytosol;GO:0005886:plasma membrane;GO:0031410:cytoplasmic vesicle;	GO:0005515:protein binding;	K04523
ENSMUSG00000038463	363.197	2.80916	0.114901	24.4486	5.21e-132	5.91e-130	1	170644532	170682789	+	Olfml2b	olfactomedin-like 2B [Source:MGI Symbol%3BAcc:MGI:2443310]	GO:0030198:extracellular matrix organization;	GO:0005578:proteinaceous extracellular matrix;GO:0005615:extracellular space;	GO:0050840:extracellular matrix binding;	-
ENSMUSG00000010476	285.363	5.42708	0.222086	24.4368	6.96e-132	7.84e-130	7	137193673	137314445	-	Ebf3	early B cell factor 3 [Source:MGI Symbol%3BAcc:MGI:894289]	GO:0006366:transcription from RNA polymerase II promoter;GO:0007275:multicellular organismal development;GO:0045893:positive regulation of transcription, DNA-templated;GO:0045944:positive regulation of transcription from RNA polymerase II promoter;	GO:0005634:nucleus;	GO:0000978:RNA polymerase II core promoter proximal region sequence-specific DNA binding;GO:0001077:RNA polymerase II core promoter proximal region sequence-specific DNA binding transcription factor activity involved in positive regulation of transcription;GO:0005515:protein binding;GO:0046872:metal ion binding;	K09103
ENSMUSG00000020773	475.563	-2.79456	0.114392	-24.4297	8.27e-132	9.28e-130	11	116105752	116127210	-	Trim47	tripartite motif-containing 47 [Source:MGI Symbol%3BAcc:MGI:1917374]	GO:0008150:biological_process;	GO:0005634:nucleus;GO:0005829:cytosol;	GO:0008270:zinc ion binding;	K12023
ENSMUSG00000034765	1829.55	1.58217	0.064792	24.4193	1.07e-131	1.19e-129	19	53529109	53542431	+	Dusp5	dual specificity phosphatase 5 [Source:MGI Symbol%3BAcc:MGI:2685183]	GO:0000188:inactivation of MAPK activity;GO:0001706:endoderm formation;GO:0016311:dephosphorylation;GO:0035335:peptidyl-tyrosine dephosphorylation;GO:0035970:peptidyl-threonine dephosphorylation;	-	GO:0004725:protein tyrosine phosphatase activity;GO:0008138:protein tyrosine/serine/threonine phosphatase activity;GO:0016791:phosphatase activity;GO:0017017:MAP kinase tyrosine/serine/threonine phosphatase activity;	K04459
ENSMUSG00000003541	5620.65	-0.983499	0.0403342	-24.3837	2.54e-131	2.82e-129	17	35821684	35822923	+	Ier3	immediate early response 3 [Source:MGI Symbol%3BAcc:MGI:104814]	GO:0001562:response to protozoan;GO:0003085:negative regulation of systemic arterial blood pressure;GO:0006282:regulation of DNA repair;GO:0007095:mitotic G2 DNA damage checkpoint;GO:0008630:intrinsic apoptotic signaling pathway in response to DNA damage;GO:0045732:positive regulation of protein catabolic process;GO:0045820:negative regulation of glycolytic process;GO:0046822:regulation of nucleo…	GO:0005634:nucleus;GO:0005739:mitochondrion;GO:0016021:integral component of membrane;	-	-
ENSMUSG00000024066	2090.05	-1.56709	0.0642991	-24.3719	3.4e-131	3.75e-129	17	73883908	73950182	-	Xdh	xanthine dehydrogenase [Source:MGI Symbol%3BAcc:MGI:98973]	GO:0001933:negative regulation of protein phosphorylation;GO:0001937:negative regulation of endothelial cell proliferation;GO:0006919:activation of cysteine-type endopeptidase activity involved in apoptotic process;GO:0007595:lactation;GO:0009115:xanthine catabolic process;GO:0010629:negative regulation of gene expression;GO:0030856:regulation of epithelial cell differentiation;GO:0045602:negativ…	GO:0005615:extracellular space;GO:0005777:peroxisome;GO:0005829:cytosol;GO:0016529:sarcoplasmic reticulum;	GO:0004854:xanthine dehydrogenase activity;GO:0004855:xanthine oxidase activity;GO:0005506:iron ion binding;GO:0005515:protein binding;GO:0009055:electron carrier activity;GO:0016491:oxidoreductase activity;GO:0016614:oxidoreductase activity, acting on CH-OH group of donors;GO:0016903:oxidoreductase activity, acting on the aldehyde or oxo group of donors;GO:0030151:molybdenum ion binding;GO:00428…	K00106
ENSMUSG00000022865	1719.01	-1.25523	0.0516943	-24.2818	3.05e-130	3.34e-128	16	78301496	78359785	+	Cxadr	coxsackie virus and adenovirus receptor [Source:MGI Symbol%3BAcc:MGI:1201679]	GO:0007005:mitochondrion organization;GO:0007157:heterophilic cell-cell adhesion via plasma membrane cell adhesion molecules;GO:0007507:heart development;GO:0008354:germ cell migration;GO:0010669:epithelial structure maintenance;GO:0016337:single organismal cell-cell adhesion;GO:0030593:neutrophil chemotaxis;GO:0031532:actin cytoskeleton reorganization;GO:0034109:homotypic cell-cell adhesion;GO:0…	GO:0001669:acrosomal vesicle;GO:0005615:extracellular space;GO:0005634:nucleus;GO:0005654:nucleoplasm;GO:0005737:cytoplasm;GO:0005886:plasma membrane;GO:0005911:cell-cell junction;GO:0005912:adherens junction;GO:0005913:cell-cell adherens junction;GO:0005923:bicellular tight junction;GO:0014704:intercalated disc;GO:0016021:integral component of membrane;GO:0016323:basolateral plasma membrane;GO:0…	GO:0005102:receptor binding;GO:0005178:integrin binding;GO:0005515:protein binding;GO:0008013:beta-catenin binding;GO:0030165:PDZ domain binding;GO:0042802:identical protein binding;GO:0050839:cell adhesion molecule binding;GO:0071253:connexin binding;GO:0086082:cell adhesive protein binding involved in AV node cell-bundle of His cell communication;	K06788
ENSMUSG00000021453	310.26	3.08802	0.127208	24.2754	3.57e-130	3.89e-128	13	51846678	51848468	+	Gadd45g	growth arrest and DNA-damage-inducible 45 gamma [Source:MGI Symbol%3BAcc:MGI:1346325]	GO:0000185:activation of MAPKKK activity;GO:0000186:activation of MAPKK activity;GO:0006469:negative regulation of protein kinase activity;GO:0006915:apoptotic process;GO:0006950:response to stress;GO:0042095:interferon-gamma biosynthetic process;GO:0043065:positive regulation of apoptotic process;GO:0045063:T-helper 1 cell differentiation;GO:0046330:positive regulation of JNK cascade;GO:0051726:…	GO:0005634:nucleus;GO:0005737:cytoplasm;	GO:0005515:protein binding;	K04402
ENSMUSG00000048376	4911.1	1.01038	0.0416413	24.2638	4.73e-130	5.12e-128	13	95601803	95618487	-	F2r	coagulation factor II (thrombin) receptor [Source:MGI Symbol%3BAcc:MGI:101802]	GO:0000186:activation of MAPKK activity;GO:0002248:connective tissue replacement involved in inflammatory response wound healing;GO:0003105:negative regulation of glomerular filtration;GO:0006919:activation of cysteine-type endopeptidase activity involved in apoptotic process;GO:0006954:inflammatory response;GO:0007200:phospholipase C-activating G-protein coupled receptor signaling pathway;GO:000…	GO:0005769:early endosome;GO:0005770:late endosome;GO:0005886:plasma membrane;GO:0005887:integral component of plasma membrane;GO:0005901:caveola;GO:0009986:cell surface;GO:0031094:platelet dense tubular network;GO:0031594:neuromuscular junction;GO:0045211:postsynaptic membrane;	GO:0001965:G-protein alpha-subunit binding;GO:0004930:G-protein coupled receptor activity;GO:0005102:receptor binding;GO:0015057:thrombin receptor activity;GO:0031681:G-protein beta-subunit binding;GO:0032795:heterotrimeric G-protein binding;	K03914
ENSMUSG00000004040	1320.19	-1.47852	0.0613071	-24.1165	1.68e-128	1.81e-126	11	100885098	100939540	-	Stat3	signal transducer and activator of transcription 3 [Source:MGI Symbol%3BAcc:MGI:103038]	GO:0001659:temperature homeostasis;GO:0001754:eye photoreceptor cell differentiation;GO:0006355:regulation of transcription, DNA-templated;GO:0006366:transcription from RNA polymerase II promoter;GO:0006606:protein import into nucleus;GO:0006953:acute-phase response;GO:0006954:inflammatory response;GO:0007259:JAK-STAT cascade;GO:0007568:aging;GO:0008283:cell proliferation;GO:0008284:positive regu…	GO:0000790:nuclear chromatin;GO:0005634:nucleus;GO:0005654:nucleoplasm;GO:0005737:cytoplasm;GO:0005743:mitochondrial inner membrane;GO:0005829:cytosol;GO:0005886:plasma membrane;GO:0090575:RNA polymerase II transcription factor complex;	GO:0000978:RNA polymerase II core promoter proximal region sequence-specific DNA binding;GO:0000981:sequence-specific DNA binding RNA polymerase II transcription factor activity;GO:0001077:RNA polymerase II core promoter proximal region sequence-specific DNA binding transcription factor activity involved in positive regulation of transcription;GO:0001103:RNA polymerase II repressing transcription…	K04692
ENSMUSG00000022421	964.862	1.61351	0.0669116	24.1141	1.78e-128	1.91e-126	15	79786352	79804766	-	Nptxr	neuronal pentraxin receptor [Source:MGI Symbol%3BAcc:MGI:1920590]	GO:0031175:neuron projection development;	GO:0005886:plasma membrane;GO:0016021:integral component of membrane;	GO:0019903:protein phosphatase binding;GO:0046872:metal ion binding;	-
ENSMUSG00000051166	323.251	-3.19513	0.132577	-24.1002	2.49e-128	2.65e-126	12	98786805	98901484	-	Eml5	echinoderm microtubule associated protein like 5 [Source:MGI Symbol%3BAcc:MGI:2442513]	GO:0008150:biological_process;	GO:0005737:cytoplasm;GO:0005874:microtubule;GO:0015630:microtubule cytoskeleton;GO:0070062:extracellular exosome;	GO:0008017:microtubule binding;	K18597
ENSMUSG00000040488	1129.8	-1.5816	0.0656716	-24.0835	3.72e-128	3.94e-126	7	27305136	27337692	-	Ltbp4	latent transforming growth factor beta binding protein 4 [Source:MGI Symbol%3BAcc:MGI:1321395]	GO:0007179:transforming growth factor beta receptor signaling pathway;GO:0030162:regulation of proteolysis;GO:0046879:hormone secretion;	GO:0005578:proteinaceous extracellular matrix;GO:0005615:extracellular space;GO:0031012:extracellular matrix;GO:0070062:extracellular exosome;	GO:0005509:calcium ion binding;GO:0050431:transforming growth factor beta binding;	K08023
ENSMUSG00000028128	1066.16	1.74896	0.0726507	24.0736	4.73e-128	4.98e-126	3	121723537	121735048	+	F3	coagulation factor III [Source:MGI Symbol%3BAcc:MGI:88381]	GO:0001938:positive regulation of endothelial cell proliferation;GO:0002541:activation of plasma proteins involved in acute inflammatory response;GO:0006919:activation of cysteine-type endopeptidase activity involved in apoptotic process;GO:0007596:blood coagulation;GO:0010641:positive regulation of platelet-derived growth factor receptor signaling pathway;GO:0016485:protein processing;GO:0019221…	GO:0005615:extracellular space;GO:0005886:plasma membrane;GO:0009986:cell surface;GO:0016021:integral component of membrane;GO:0031012:extracellular matrix;GO:0070062:extracellular exosome;	GO:0002020:protease binding;GO:0004252:serine-type endopeptidase activity;GO:0004896:cytokine receptor activity;GO:0005543:phospholipid binding;	-
ENSMUSG00000031486	3870.43	-1.14418	0.0475708	-24.0521	7.94e-128	8.32e-126	8	27085583	27123436	+	Adgra2	adhesion G protein-coupled receptor A2 [Source:MGI Symbol%3BAcc:MGI:1925810]	GO:0001525:angiogenesis;GO:0002040:sprouting angiogenesis;GO:0007166:cell surface receptor signaling pathway;GO:0007186:G-protein coupled receptor signaling pathway;GO:0007417:central nervous system development;GO:0010595:positive regulation of endothelial cell migration;GO:0043542:endothelial cell migration;GO:0045765:regulation of angiogenesis;GO:0050920:regulation of chemotaxis;GO:0090210:regu…	GO:0005886:plasma membrane;GO:0009986:cell surface;GO:0016021:integral component of membrane;GO:0030175:filopodium;	GO:0004930:G-protein coupled receptor activity;	-
ENSMUSG00000000938	347.603	-3.17981	0.132735	-23.9562	7.97e-127	8.31e-125	6	52231197	52240854	-	Hoxa10	homeobox A10 [Source:MGI Symbol%3BAcc:MGI:96171]	GO:0001501:skeletal system development;GO:0006366:transcription from RNA polymerase II promoter;GO:0007275:multicellular organismal development;GO:0007283:spermatogenesis;GO:0007338:single fertilization;GO:0008584:male gonad development;GO:0009952:anterior/posterior pattern specification;GO:0009954:proximal/distal pattern formation;GO:0010468:regulation of gene expression;GO:0030326:embryonic lim…	GO:0005634:nucleus;GO:0005667:transcription factor complex;GO:0005737:cytoplasm;	GO:0000978:RNA polymerase II core promoter proximal region sequence-specific DNA binding;GO:0001077:RNA polymerase II core promoter proximal region sequence-specific DNA binding transcription factor activity involved in positive regulation of transcription;GO:0003677:DNA binding;GO:0042826:histone deacetylase binding;	K17443
ENSMUSG00000015305	825.995	-1.74016	0.0727125	-23.9321	1.42e-126	1.47e-124	10	8722219	8886070	-	Sash1	SAM and SH3 domain containing 1 [Source:MGI Symbol%3BAcc:MGI:1917347]	GO:0000209:protein polyubiquitination;GO:0010595:positive regulation of endothelial cell migration;GO:0031666:positive regulation of lipopolysaccharide-mediated signaling pathway;GO:0043507:positive regulation of JUN kinase activity;GO:0045766:positive regulation of angiogenesis;GO:1900044:regulation of protein K63-linked ubiquitination;GO:1900745:positive regulation of p38MAPK cascade;GO:1901224…	GO:0016020:membrane;GO:0043234:protein complex;	GO:0008022:protein C-terminus binding;GO:0019901:protein kinase binding;GO:0031435:mitogen-activated protein kinase kinase kinase binding;GO:0032947:protein complex scaffold;	-
ENSMUSG00000030761	340.516	3.05513	0.127817	23.9024	2.89e-126	2.98e-124	7	98051060	98119524	-	Myo7a	myosin VIIA [Source:MGI Symbol%3BAcc:MGI:104510]	GO:0001845:phagolysosome assembly;GO:0006886:intracellular protein transport;GO:0006909:phagocytosis;GO:0007040:lysosome organization;GO:0007600:sensory perception;GO:0007601:visual perception;GO:0007605:sensory perception of sound;GO:0030030:cell projection organization;GO:0030048:actin filament-based movement;GO:0042472:inner ear morphogenesis;GO:0042490:mechanoreceptor differentiation;GO:00424…	GO:0001750:photoreceptor outer segment;GO:0001917:photoreceptor inner segment;GO:0005737:cytoplasm;GO:0005765:lysosomal membrane;GO:0005829:cytosol;GO:0005902:microvillus;GO:0005938:cell cortex;GO:0016324:apical plasma membrane;GO:0031477:myosin VII complex;GO:0032391:photoreceptor connecting cilium;GO:0032420:stereocilium;GO:0042470:melanosome;GO:0045202:synapse;GO:1990435:upper tip-link density;	GO:0000146:microfilament motor activity;GO:0005515:protein binding;GO:0005516:calmodulin binding;GO:0005524:ATP binding;GO:0019904:protein domain specific binding;GO:0030507:spectrin binding;GO:0030898:actin-dependent ATPase activity;GO:0042803:protein homodimerization activity;GO:0043531:ADP binding;GO:0047485:protein N-terminus binding;GO:0051015:actin filament binding;	K10359
ENSMUSG00000047996	429.6	7.56371	0.316614	23.8893	3.95e-126	4.05e-124	X	78449613	78583896	-	Prrg1	proline rich Gla (G-carboxyglutamic acid) 1 [Source:MGI Symbol%3BAcc:MGI:1917364]	GO:0008150:biological_process;	GO:0005575:cellular_component;GO:0005576:extracellular region;GO:0016021:integral component of membrane;	GO:0003674:molecular_function;GO:0005509:calcium ion binding;	-
ENSMUSG00000029063	3439.57	-1.1991	0.0502681	-23.854	9.19e-126	9.37e-124	4	155562378	155591001	+	Nadk	NAD kinase [Source:MGI Symbol%3BAcc:MGI:2183149]	GO:0006741:NADP biosynthetic process;GO:0016310:phosphorylation;GO:0019674:NAD metabolic process;	GO:0005829:cytosol;	GO:0003951:NAD+ kinase activity;GO:0005524:ATP binding;GO:0046872:metal ion binding;	K00858
ENSMUSG00000031812	3086.33	-1.13696	0.0477143	-23.8285	1.69e-125	1.72e-123	8	121590361	121598760	+	Map1lc3b	microtubule-associated protein 1 light chain 3 beta [Source:MGI Symbol%3BAcc:MGI:1914693]	GO:0000045:autophagosome assembly;GO:0000422:mitochondrion degradation;GO:0006914:autophagy;GO:0006995:cellular response to nitrogen starvation;GO:0070257:positive regulation of mucus secretion;	GO:0000421:autophagosome membrane;GO:0005622:intracellular;GO:0005739:mitochondrion;GO:0005776:autophagosome;GO:0005829:cytosol;GO:0005874:microtubule;GO:0005930:axoneme;GO:0012505:endomembrane system;GO:0016020:membrane;GO:0031410:cytoplasmic vesicle;GO:0044754:autolysosome;	GO:0005515:protein binding;GO:0031625:ubiquitin protein ligase binding;	-
ENSMUSG00000029070	2896.8	-1.19068	0.0500805	-23.7753	6.02e-125	6.07e-123	4	155839680	155844088	+	Mxra8	matrix-remodelling associated 8 [Source:MGI Symbol%3BAcc:MGI:1922011]	GO:0008150:biological_process;GO:0060857:establishment of glial blood-brain barrier;	GO:0009986:cell surface;GO:0016021:integral component of membrane;GO:0070062:extracellular exosome;	GO:0003674:molecular_function;	-
ENSMUSG00000041046	468.303	2.32797	0.0981643	23.715	2.52e-124	2.53e-122	11	6658521	6677475	+	Ramp3	receptor (calcitonin) activity modifying protein 3 [Source:MGI Symbol%3BAcc:MGI:1860292]	GO:0001921:positive regulation of receptor recycling;GO:0006816:calcium ion transport;GO:0006886:intracellular protein transport;GO:0007186:G-protein coupled receptor signaling pathway;GO:0008277:regulation of G-protein coupled receptor protein signaling pathway;GO:0010628:positive regulation of gene expression;GO:0010739:positive regulation of protein kinase A signaling;GO:0010942:positive regul…	GO:0005622:intracellular;GO:0005764:lysosome;GO:0005886:plasma membrane;GO:0009986:cell surface;GO:0043235:receptor complex;GO:1903440:amylin receptor complex;	GO:0004872:receptor activity;GO:0008565:protein transporter activity;GO:0015026:coreceptor activity;GO:0097643:amylin receptor activity;	K08449
ENSMUSG00000031673	3226.71	-1.39955	0.0590178	-23.7141	2.58e-124	2.58e-122	8	102632095	102785642	-	Cdh11	cadherin 11 [Source:MGI Symbol%3BAcc:MGI:99217]	GO:0007156:homophilic cell adhesion via plasma membrane adhesion molecules;GO:0021957:corticospinal tract morphogenesis;	GO:0005737:cytoplasm;GO:0005886:plasma membrane;GO:0016021:integral component of membrane;GO:0070062:extracellular exosome;	GO:0005509:calcium ion binding;	K06803
ENSMUSG00000067212	338.252	-2.96674	0.125113	-23.7125	2.68e-124	2.66e-122	17	36029773	36032855	-	H2-T23	histocompatibility 2%2C T region locus 23 [Source:MGI Symbol%3BAcc:MGI:95957]	GO:0001916:positive regulation of T cell mediated cytotoxicity;GO:0002250:adaptive immune response;GO:0002474:antigen processing and presentation of peptide antigen via MHC class I;GO:0002476:antigen processing and presentation of endogenous peptide antigen via MHC class Ib;GO:0002489:antigen processing and presentation of endogenous peptide antigen via MHC class Ib via ER pathway, TAP-dependent;…	GO:0005886:plasma membrane;GO:0009986:cell surface;GO:0030670:phagocytic vesicle membrane;GO:0032398:MHC class Ib protein complex;GO:0042612:MHC class I protein complex;GO:0070062:extracellular exosome;GO:0071556:integral component of lumenal side of endoplasmic reticulum membrane;	GO:0005102:receptor binding;GO:0030881:beta-2-microglobulin binding;GO:0042288:MHC class I protein binding;GO:0042605:peptide antigen binding;GO:0042608:T cell receptor binding;GO:0046703:natural killer cell lectin-like receptor binding;	K06751
ENSMUSG00000031904	1837.96	-1.25679	0.0531016	-23.6676	7.78e-124	7.69e-122	8	106168857	106198706	+	Slc7a6	solute carrier family 7 (cationic amino acid transporter%2C y+ system)%2C member 6 [Source:MGI Symbol%3BAcc:MGI:2142598]	GO:1902475:L-alpha-amino acid transmembrane transport;	GO:0005886:plasma membrane;GO:0005887:integral component of plasma membrane;GO:0016323:basolateral plasma membrane;GO:0043231:intracellular membrane-bounded organelle;	GO:0015179:L-amino acid transmembrane transporter activity;GO:0015297:antiporter activity;	K13872
ENSMUSG00000048126	3775.19	1.3848	0.0586034	23.6301	1.89e-123	1.86e-121	1	90765923	90843971	-	Col6a3	collagen%2C type VI%2C alpha 3 [Source:MGI Symbol%3BAcc:MGI:88461]	GO:0010951:negative regulation of endopeptidase activity;	GO:0005578:proteinaceous extracellular matrix;GO:0005581:collagen trimer;GO:0005615:extracellular space;GO:0031012:extracellular matrix;GO:0042383:sarcolemma;GO:0070062:extracellular exosome;GO:1903561:extracellular vesicle;	GO:0004867:serine-type endopeptidase inhibitor activity;	-
ENSMUSG00000034463	247.78	5.0426	0.214314	23.5291	2.06e-122	2.01e-120	14	65919395	65953744	-	Scara3	scavenger receptor class A%2C member 3 [Source:MGI Symbol%3BAcc:MGI:2444418]	-	GO:0000139:Golgi membrane;GO:0005581:collagen trimer;GO:0005783:endoplasmic reticulum;GO:0005789:endoplasmic reticulum membrane;GO:0016021:integral component of membrane;	-	-
ENSMUSG00000001472	6553.63	-0.929303	0.0395505	-23.4966	4.41e-122	4.3e-120	8	123373753	123403835	+	Tcf25	transcription factor 25 (basic helix-loop-helix) [Source:MGI Symbol%3BAcc:MGI:1914105]	GO:0000122:negative regulation of transcription from RNA polymerase II promoter;GO:0006351:transcription, DNA-templated;	GO:0005634:nucleus;	GO:0003677:DNA binding;GO:0003700:sequence-specific DNA binding transcription factor activity;	-
ENSMUSG00000033538	603.055	-2.00772	0.0855562	-23.4667	8.93e-122	8.64e-120	9	5308828	5336783	+	Casp4	caspase 4%2C apoptosis-related cysteine peptidase [Source:MGI Symbol%3BAcc:MGI:107700]	GO:0006508:proteolysis;GO:0006954:inflammatory response;GO:0007015:actin filament organization;GO:0021762:substantia nigra development;GO:0035234:ectopic germ cell programmed cell death;GO:0042981:regulation of apoptotic process;GO:0045087:innate immune response;GO:0050718:positive regulation of interleukin-1 beta secretion;GO:0050727:regulation of inflammatory response;GO:0070059:intrinsic apopt…	GO:0005576:extracellular region;GO:0005739:mitochondrion;GO:0005783:endoplasmic reticulum;GO:0005789:endoplasmic reticulum membrane;GO:0005829:cytosol;GO:0005886:plasma membrane;GO:0043005:neuron projection;GO:0043025:neuronal cell body;GO:0072557:IPAF inflammasome complex;GO:0072558:NLRP1 inflammasome complex;GO:0072559:NLRP3 inflammasome complex;GO:0097169:AIM2 inflammasome complex;	GO:0008233:peptidase activity;GO:0097110:scaffold protein binding;GO:0097153:cysteine-type endopeptidase activity involved in apoptotic process;GO:0097200:cysteine-type endopeptidase activity involved in execution phase of apoptosis;	-
ENSMUSG00000030067	2771.95	-1.09573	0.0467132	-23.4565	1.13e-121	1.09e-119	6	98925338	99522721	-	Foxp1	forkhead box P1 [Source:MGI Symbol%3BAcc:MGI:1914004]	GO:0000122:negative regulation of transcription from RNA polymerase II promoter;GO:0001701:in utero embryonic development;GO:0002053:positive regulation of mesenchymal cell proliferation;GO:0002329:pre-B cell differentiation;GO:0002639:positive regulation of immunoglobulin production;GO:0002903:negative regulation of B cell apoptotic process;GO:0006351:transcription, DNA-templated;GO:0007507:hear…	GO:0005634:nucleus;GO:0005654:nucleoplasm;GO:0005737:cytoplasm;	GO:0000978:RNA polymerase II core promoter proximal region sequence-specific DNA binding;GO:0001078:RNA polymerase II core promoter proximal region sequence-specific DNA binding transcription factor activity involved in negative regulation of transcription;GO:0003677:DNA binding;GO:0003682:chromatin binding;GO:0003700:sequence-specific DNA binding transcription factor activity;GO:0003705:RNA poly…	K09409
ENSMUSG00000000753	7084.31	0.997899	0.0425543	23.45	1.32e-121	1.27e-119	11	75409769	75422701	-	Serpinf1	serine (or cysteine) peptidase inhibitor%2C clade F%2C member 1 [Source:MGI Symbol%3BAcc:MGI:108080]	GO:0001822:kidney development;GO:0007568:aging;GO:0007614:short-term memory;GO:0010447:response to acidic pH;GO:0010596:negative regulation of endothelial cell migration;GO:0010629:negative regulation of gene expression;GO:0010951:negative regulation of endopeptidase activity;GO:0010976:positive regulation of neuron projection development;GO:0016525:negative regulation of angiogenesis;GO:0042698:…	GO:0005576:extracellular region;GO:0005604:basement membrane;GO:0005615:extracellular space;GO:0031012:extracellular matrix;GO:0042470:melanosome;GO:0043203:axon hillock;GO:0048471:perinuclear region of cytoplasm;GO:0070062:extracellular exosome;	GO:0004867:serine-type endopeptidase inhibitor activity;	-
ENSMUSG00000026932	609.128	2.04297	0.0871421	23.4442	1.52e-121	1.45e-119	2	26055535	26123220	-	Nacc2	nucleus accumbens associated 2%2C BEN and BTB (POZ) domain containing [Source:MGI Symbol%3BAcc:MGI:1915241]	GO:0008285:negative regulation of cell proliferation;GO:0010608:posttranscriptional regulation of gene expression;GO:0016575:histone deacetylation;GO:0034629:cellular protein complex localization;GO:0045892:negative regulation of transcription, DNA-templated;GO:0051260:protein homooligomerization;GO:1900477:negative regulation of G1/S transition of mitotic cell cycle by negative regulation of tra…	GO:0000790:nuclear chromatin;GO:0005634:nucleus;GO:0005730:nucleolus;GO:0005739:mitochondrion;GO:0016581:NuRD complex;	GO:0000978:RNA polymerase II core promoter proximal region sequence-specific DNA binding;GO:0001076:RNA polymerase II transcription factor binding transcription factor activity;GO:0001078:RNA polymerase II core promoter proximal region sequence-specific DNA binding transcription factor activity involved in negative regulation of transcription;GO:0004407:histone deacetylase activity;GO:0042803:pro…	K10486
ENSMUSG00000056121	3292.4	1.04237	0.0444845	23.4322	2.01e-121	1.9e-119	17	78377885	78418131	-	Fez2	fasciculation and elongation protein zeta 2 (zygin II) [Source:MGI Symbol%3BAcc:MGI:2675856]	GO:0007411:axon guidance;GO:1902902:negative regulation of autophagosome assembly;	GO:0005737:cytoplasm;GO:0030424:axon;	GO:0005515:protein binding;	-
ENSMUSG00000031584	2741.21	-1.06343	0.0453933	-23.427	2.27e-121	2.14e-119	8	33652523	33698163	+	Gsr	glutathione reductase [Source:MGI Symbol%3BAcc:MGI:95804]	GO:0006749:glutathione metabolic process;GO:0045454:cell redox homeostasis;GO:0055114:oxidation-reduction process;	GO:0005739:mitochondrion;GO:0009897:external side of plasma membrane;GO:0070062:extracellular exosome;	GO:0004362:glutathione-disulfide reductase activity;GO:0050660:flavin adenine dinucleotide binding;GO:0050661:NADP binding;	K00383
ENSMUSG00000039221	1417.84	1.56885	0.0669967	23.4168	2.88e-121	2.71e-119	3	28805436	28807424	+	Rpl22l1	ribosomal protein L22 like 1 [Source:MGI Symbol%3BAcc:MGI:1915278]	GO:0002181:cytoplasmic translation;	GO:0022625:cytosolic large ribosomal subunit;	GO:0003723:RNA binding;GO:0003735:structural constituent of ribosome;	K02891
ENSMUSG00000104861	242.967	3.80918	0.162757	23.4041	3.89e-121	3.63e-119	12	49389652	49407360	+	3110039M20Rik	RIKEN cDNA 3110039M20 gene [Source:MGI Symbol%3BAcc:MGI:1914543]	-	-	-	-
ENSMUSG00000012519	275.737	-4.62469	0.197871	-23.3723	8.18e-121	7.61e-119	8	111311797	111338177	-	Mlkl	mixed lineage kinase domain-like [Source:MGI Symbol%3BAcc:MGI:1921818]	GO:0006468:protein phosphorylation;GO:0035556:intracellular signal transduction;GO:0070207:protein homotrimerization;GO:0070266:necroptotic process;	GO:0005737:cytoplasm;GO:0005886:plasma membrane;	GO:0004672:protein kinase activity;GO:0004871:signal transducer activity;GO:0005515:protein binding;GO:0005524:ATP binding;GO:0019901:protein kinase binding;GO:0032403:protein complex binding;	K08849
ENSMUSG00000022816	8690.22	-0.876555	0.0376458	-23.2843	6.4e-120	5.93e-118	16	37776873	37836514	+	Fstl1	follistatin-like 1 [Source:MGI Symbol%3BAcc:MGI:102793]	GO:0042594:response to starvation;	GO:0005615:extracellular space;GO:0070062:extracellular exosome;	GO:0005509:calcium ion binding;GO:0005515:protein binding;GO:0008201:heparin binding;	-
ENSMUSG00000026202	673.239	-1.84519	0.0793187	-23.2629	1.05e-119	9.7e-118	1	75214228	75219865	-	Tuba4a	tubulin%2C alpha 4A [Source:MGI Symbol%3BAcc:MGI:1095410]	GO:0007010:cytoskeleton organization;GO:0007017:microtubule-based process;	GO:0005737:cytoplasm;GO:0005874:microtubule;GO:0015630:microtubule cytoskeleton;GO:0070062:extracellular exosome;	GO:0003924:GTPase activity;GO:0005200:structural constituent of cytoskeleton;GO:0005525:GTP binding;GO:0019899:enzyme binding;	K07374
ENSMUSG00000031827	257.69	3.33513	0.143399	23.2577	1.19e-119	1.09e-117	8	119809222	119840544	-	Cotl1	coactosin-like 1 (Dictyostelium) [Source:MGI Symbol%3BAcc:MGI:1919292]	GO:0050832:defense response to fungus;	GO:0005575:cellular_component;GO:0005634:nucleus;GO:0005737:cytoplasm;GO:0005856:cytoskeleton;GO:0070062:extracellular exosome;	GO:0003779:actin binding;GO:0005515:protein binding;GO:0019899:enzyme binding;	-
ENSMUSG00000047414	1289.78	-1.43936	0.062052	-23.196	4.99e-119	4.56e-117	12	95692226	95785215	+	Flrt2	fibronectin leucine rich transmembrane protein 2 [Source:MGI Symbol%3BAcc:MGI:3603594]	GO:0003007:heart morphogenesis;GO:0006469:negative regulation of protein kinase activity;GO:0007411:axon guidance;GO:0008543:fibroblast growth factor receptor signaling pathway;GO:0019221:cytokine-mediated signaling pathway;GO:0046426:negative regulation of JAK-STAT cascade;GO:0050919:negative chemotaxis;GO:0051965:positive regulation of synapse assembly;GO:0061343:cell adhesion involved in heart…	GO:0005578:proteinaceous extracellular matrix;GO:0005615:extracellular space;GO:0005737:cytoplasm;GO:0005789:endoplasmic reticulum membrane;GO:0005887:integral component of plasma membrane;GO:0005911:cell-cell junction;GO:0005925:focal adhesion;GO:0031090:organelle membrane;GO:0043005:neuron projection;GO:0045202:synapse;GO:0070062:extracellular exosome;	GO:0004860:protein kinase inhibitor activity;GO:0005104:fibroblast growth factor receptor binding;GO:0005515:protein binding;GO:0045499:chemorepellent activity;	K16362
ENSMUSG00000074743	265.777	5.71794	0.246745	23.1735	8.44e-119	7.66e-117	2	148404466	148408188	-	Thbd	thrombomodulin [Source:MGI Symbol%3BAcc:MGI:98736]	GO:0007165:signal transduction;GO:0007565:female pregnancy;GO:0007596:blood coagulation;GO:0010165:response to X-ray;GO:0030195:negative regulation of blood coagulation;GO:0032496:response to lipopolysaccharide;GO:0050819:negative regulation of coagulation;GO:0051591:response to cAMP;	GO:0005615:extracellular space;GO:0005774:vacuolar membrane;GO:0005886:plasma membrane;GO:0005887:integral component of plasma membrane;GO:0009986:cell surface;GO:0016327:apicolateral plasma membrane;	GO:0004888:transmembrane signaling receptor activity;GO:0005509:calcium ion binding;	K03907
ENSMUSG00000078453	2058.1	1.41498	0.0611001	23.1584	1.2e-118	1.08e-116	10	18011260	18023288	-	Abracl	ABRA C-terminal like [Source:MGI Symbol%3BAcc:MGI:1920362]	GO:0008150:biological_process;	GO:0005575:cellular_component;	GO:0003674:molecular_function;	-
ENSMUSG00000059336	1351.8	1.41073	0.0609799	23.1344	2.09e-118	1.88e-116	18	78100091	78142119	-	Slc14a1	solute carrier family 14 (urea transporter)%2C member 1 [Source:MGI Symbol%3BAcc:MGI:1351654]	GO:0006833:water transport;GO:0015840:urea transport;GO:0071918:urea transmembrane transport;	GO:0005730:nucleolus;GO:0005886:plasma membrane;GO:0005887:integral component of plasma membrane;GO:0016021:integral component of membrane;GO:0016323:basolateral plasma membrane;GO:0043231:intracellular membrane-bounded organelle;	GO:0005372:water transmembrane transporter activity;GO:0015204:urea transmembrane transporter activity;GO:0015265:urea channel activity;	K08716
ENSMUSG00000031924	6882.32	-0.886197	0.0383164	-23.1284	2.4e-118	2.15e-116	8	107150640	107187471	+	Cyb5b	cytochrome b5 type B [Source:MGI Symbol%3BAcc:MGI:1913677]	GO:0043085:positive regulation of catalytic activity;GO:0055114:oxidation-reduction process;	GO:0005739:mitochondrion;GO:0005741:mitochondrial outer membrane;GO:0005743:mitochondrial inner membrane;GO:0016020:membrane;GO:0016021:integral component of membrane;	GO:0008047:enzyme activator activity;GO:0020037:heme binding;GO:0046872:metal ion binding;	-
ENSMUSG00000022091	752.955	1.75294	0.0759601	23.0772	7.85e-118	7e-116	14	70180468	70207637	-	Sorbs3	sorbin and SH3 domain containing 3 [Source:MGI Symbol%3BAcc:MGI:700013]	GO:0000122:negative regulation of transcription from RNA polymerase II promoter;GO:0007015:actin filament organization;GO:0031589:cell-substrate adhesion;GO:0043410:positive regulation of MAPK cascade;GO:0051496:positive regulation of stress fiber assembly;	GO:0005634:nucleus;GO:0005737:cytoplasm;GO:0005856:cytoskeleton;GO:0005925:focal adhesion;	GO:0008134:transcription factor binding;GO:0017166:vinculin binding;	-
ENSMUSG00000018417	2628.31	-1.09688	0.04761	-23.039	1.9e-117	1.68e-115	1	51749765	51916071	-	Myo1b	myosin IB [Source:MGI Symbol%3BAcc:MGI:107752]	GO:0006892:post-Golgi vesicle-mediated transport;GO:0007015:actin filament organization;GO:0030048:actin filament-based movement;GO:0051017:actin filament bundle assembly;	GO:0005737:cytoplasm;GO:0005769:early endosome;GO:0005884:actin filament;GO:0005886:plasma membrane;GO:0005903:brush border;GO:0010008:endosome membrane;GO:0016459:myosin complex;GO:0030175:filopodium;GO:0032588:trans-Golgi network membrane;GO:0048471:perinuclear region of cytoplasm;GO:0070062:extracellular exosome;GO:0071944:cell periphery;	GO:0000146:microfilament motor activity;GO:0005516:calmodulin binding;GO:0005524:ATP binding;GO:0005546:phosphatidylinositol-4,5-bisphosphate binding;GO:0005547:phosphatidylinositol-3,4,5-trisphosphate binding;GO:0045296:cadherin binding;GO:0051015:actin filament binding;	K10356
ENSMUSG00000017009	5196.55	-1.01618	0.0441451	-23.019	3.01e-117	2.66e-115	2	164424247	164443887	-	Sdc4	syndecan 4 [Source:MGI Symbol%3BAcc:MGI:1349164]	GO:0001657:ureteric bud development;GO:0001843:neural tube closure;GO:0006024:glycosaminoglycan biosynthetic process;GO:0007165:signal transduction;GO:0010762:regulation of fibroblast migration;GO:0042060:wound healing;GO:0042130:negative regulation of T cell proliferation;GO:0045860:positive regulation of protein kinase activity;GO:0051496:positive regulation of stress fiber assembly;GO:0051894:…	GO:0005796:Golgi lumen;GO:0005925:focal adhesion;GO:0009986:cell surface;GO:0016021:integral component of membrane;GO:0043034:costamere;GO:0045121:membrane raft;GO:0070062:extracellular exosome;	GO:0001968:fibronectin binding;GO:0005080:protein kinase C binding;GO:0005515:protein binding;GO:0070053:thrombospondin receptor activity;	K16338
ENSMUSG00000040133	1207.53	-1.44615	0.0628422	-23.0125	3.5e-117	3.07e-115	2	118277110	118373419	-	Gpr176	G protein-coupled receptor 176 [Source:MGI Symbol%3BAcc:MGI:2685858]	GO:0007186:G-protein coupled receptor signaling pathway;GO:0008150:biological_process;GO:0030818:negative regulation of cAMP biosynthetic process;GO:0048512:circadian behavior;	GO:0005575:cellular_component;GO:0005886:plasma membrane;GO:0016021:integral component of membrane;	GO:0003674:molecular_function;GO:0004930:G-protein coupled receptor activity;	K08442
ENSMUSG00000027827	461.687	2.17267	0.0944716	22.9981	4.87e-117	4.26e-115	3	65109384	65378223	+	Kcnab1	potassium voltage-gated channel%2C shaker-related subfamily%2C beta member 1 [Source:MGI Symbol%3BAcc:MGI:109155]	GO:0007420:brain development;GO:0007507:heart development;GO:0007519:skeletal muscle tissue development;GO:0007611:learning or memory;GO:0045445:myoblast differentiation;GO:0055114:oxidation-reduction process;GO:0060539:diaphragm development;GO:0071805:potassium ion transmembrane transport;GO:1901016:regulation of potassium ion transmembrane transporter activity;GO:1901379:regulation of potassium…	GO:0005829:cytosol;GO:0008076:voltage-gated potassium channel complex;GO:0031234:extrinsic component of cytoplasmic side of plasma membrane;GO:0032839:dendrite cytoplasm;GO:0034705:potassium channel complex;GO:0043204:perikaryon;GO:0044224:juxtaparanode region of axon;GO:1990635:proximal dendrite;	GO:0004033:aldo-keto reductase (NADP) activity;GO:0005249:voltage-gated potassium channel activity;GO:0005515:protein binding;GO:0015459:potassium channel regulator activity;GO:0019904:protein domain specific binding;GO:0044325:ion channel binding;GO:0070402:NADPH binding;	K04882
ENSMUSG00000039116	764.627	-1.69031	0.0737552	-22.9178	3.09e-116	2.69e-114	10	14402583	14545179	-	Adgrg6	adhesion G protein-coupled receptor G6 [Source:MGI Symbol%3BAcc:MGI:1916151]	GO:0007005:mitochondrion organization;GO:0007166:cell surface receptor signaling pathway;GO:0007186:G-protein coupled receptor signaling pathway;GO:0010579:positive regulation of adenylate cyclase activity involved in G-protein coupled receptor signaling pathway;GO:0014037:Schwann cell differentiation;GO:0019933:cAMP-mediated signaling;GO:0022011:myelination in peripheral nervous system;GO:004255…	GO:0005737:cytoplasm;GO:0005886:plasma membrane;GO:0009986:cell surface;GO:0016021:integral component of membrane;	GO:0004930:G-protein coupled receptor activity;GO:0005515:protein binding;GO:0005518:collagen binding;GO:0043236:laminin binding;GO:0050840:extracellular matrix binding;	K08463
ENSMUSG00000058301	2879.03	-1.03665	0.0452498	-22.9096	3.73e-116	3.24e-114	8	70331525	70353278	-	Upf1	UPF1 regulator of nonsense transcripts homolog (yeast) [Source:MGI Symbol%3BAcc:MGI:107995]	GO:0000184:nuclear-transcribed mRNA catabolic process, nonsense-mediated decay;GO:0000294:nuclear-transcribed mRNA catabolic process, endonucleolytic cleavage-dependent decay;GO:0000956:nuclear-transcribed mRNA catabolic process;GO:0006260:DNA replication;GO:0006281:DNA repair;GO:0006449:regulation of translational termination;GO:0009048:dosage compensation by inactivation of X chromosome;GO:0032…	GO:0000784:nuclear chromosome, telomeric region;GO:0000785:chromatin;GO:0000932:cytoplasmic mRNA processing body;GO:0005634:nucleus;GO:0005654:nucleoplasm;GO:0035145:exon-exon junction complex;GO:0044530:supraspliceosomal complex;	GO:0003682:chromatin binding;GO:0003723:RNA binding;GO:0004004:ATP-dependent RNA helicase activity;GO:0005524:ATP binding;GO:0008270:zinc ion binding;GO:0042162:telomeric DNA binding;	K14326
ENSMUSG00000020431	270.253	6.12138	0.267225	22.9072	3.94e-116	3.4e-114	11	7063489	7178506	+	Adcy1	adenylate cyclase 1 [Source:MGI Symbol%3BAcc:MGI:99677]	GO:0006171:cAMP biosynthetic process;GO:0006182:cGMP biosynthetic process;GO:0007165:signal transduction;GO:0007189:adenylate cyclase-activating G-protein coupled receptor signaling pathway;GO:0007190:activation of adenylate cyclase activity;GO:0007409:axonogenesis;GO:0007616:long-term memory;GO:0007623:circadian rhythm;GO:0010226:response to lithium ion;GO:0019933:cAMP-mediated signaling;GO:0042…	GO:0005634:nucleus;GO:0005737:cytoplasm;GO:0005886:plasma membrane;GO:0005887:integral component of plasma membrane;GO:0008074:guanylate cyclase complex, soluble;GO:0045121:membrane raft;GO:0070062:extracellular exosome;	GO:0004016:adenylate cyclase activity;GO:0004383:guanylate cyclase activity;GO:0005516:calmodulin binding;GO:0005524:ATP binding;GO:0008294:calcium- and calmodulin-responsive adenylate cyclase activity;GO:0046872:metal ion binding;	K08041
ENSMUSG00000031983	3536.16	-0.988862	0.0433069	-22.8338	2.12e-115	1.82e-113	8	124635756	124663369	-	2310022B05Rik	RIKEN cDNA 2310022B05 gene [Source:MGI Symbol%3BAcc:MGI:1916801]	-	-	-	-
ENSMUSG00000021549	5476.71	1.00434	0.044038	22.8062	3.98e-115	3.4e-113	13	85214780	85289029	-	Rasa1	RAS p21 protein activator 1 [Source:MGI Symbol%3BAcc:MGI:97860]	GO:0001953:negative regulation of cell-matrix adhesion;GO:0007162:negative regulation of cell adhesion;GO:0007165:signal transduction;GO:0030833:regulation of actin filament polymerization;GO:0043066:negative regulation of apoptotic process;GO:0043547:positive regulation of GTPase activity;GO:0046580:negative regulation of Ras protein signal transduction;GO:0048013:ephrin receptor signaling pathw…	GO:0001726:ruffle;GO:0005737:cytoplasm;GO:0005829:cytosol;GO:0005886:plasma membrane;GO:0031235:intrinsic component of the cytoplasmic side of the plasma membrane;	GO:0001784:phosphotyrosine binding;GO:0001948:glycoprotein binding;GO:0005096:GTPase activator activity;GO:0005102:receptor binding;GO:0005515:protein binding;GO:0051020:GTPase binding;	K04352
ENSMUSG00000022261	3120.77	1.19411	0.0523641	22.804	4.19e-115	3.57e-113	15	32920723	33034730	+	Sdc2	syndecan 2 [Source:MGI Symbol%3BAcc:MGI:1349165]	GO:0006024:glycosaminoglycan biosynthetic process;GO:0016477:cell migration;GO:0048814:regulation of dendrite morphogenesis;	GO:0005796:Golgi lumen;GO:0009986:cell surface;GO:0016021:integral component of membrane;	GO:0005515:protein binding;GO:0030165:PDZ domain binding;	K16336
ENSMUSG00000022528	431.879	2.49523	0.109489	22.7898	5.79e-115	4.91e-113	16	30064384	30067796	+	Hes1	hairy and enhancer of split 1 (Drosophila) [Source:MGI Symbol%3BAcc:MGI:104853]	GO:0000122:negative regulation of transcription from RNA polymerase II promoter;GO:0001701:in utero embryonic development;GO:0001889:liver development;GO:0003143:embryonic heart tube morphogenesis;GO:0003151:outflow tract morphogenesis;GO:0003266:regulation of secondary heart field cardioblast proliferation;GO:0003281:ventricular septum development;GO:0006351:transcription, DNA-templated;GO:00063…	GO:0005622:intracellular;GO:0005634:nucleus;GO:0005654:nucleoplasm;GO:0005737:cytoplasm;	GO:0000981:sequence-specific DNA binding RNA polymerase II transcription factor activity;GO:0001078:RNA polymerase II core promoter proximal region sequence-specific DNA binding transcription factor activity involved in negative regulation of transcription;GO:0003677:DNA binding;GO:0003700:sequence-specific DNA binding transcription factor activity;GO:0005515:protein binding;GO:0008134:transcript…	K06054
ENSMUSG00000021876	591.148	-1.97355	0.0868201	-22.7315	2.19e-114	1.85e-112	14	51091077	51106151	+	Rnase4	ribonuclease%2C RNase A family 4 [Source:MGI Symbol%3BAcc:MGI:1926217]	GO:0009267:cellular response to starvation;GO:0090501:RNA phosphodiester bond hydrolysis;	GO:0005576:extracellular region;GO:0005615:extracellular space;GO:0070062:extracellular exosome;	GO:0003676:nucleic acid binding;GO:0004519:endonuclease activity;GO:0004540:ribonuclease activity;	K16632
ENSMUSG00000042804	689.254	-1.787	0.078637	-22.7247	2.55e-114	2.15e-112	4	152274232	152285337	+	Gpr153	G protein-coupled receptor 153 [Source:MGI Symbol%3BAcc:MGI:1916157]	GO:0007186:G-protein coupled receptor signaling pathway;GO:0008150:biological_process;	GO:0005575:cellular_component;GO:0005886:plasma membrane;GO:0016021:integral component of membrane;	GO:0003674:molecular_function;GO:0004930:G-protein coupled receptor activity;	K08437
ENSMUSG00000075254	253.328	3.26921	0.143867	22.7238	2.61e-114	2.18e-112	16	33684466	33771576	+	Heg1	heart development protein with EGF-like domains 1 [Source:MGI Symbol%3BAcc:MGI:1924696]	GO:0001570:vasculogenesis;GO:0001701:in utero embryonic development;GO:0001885:endothelial cell development;GO:0001886:endothelial cell morphogenesis;GO:0001944:vasculature development;GO:0001945:lymph vessel development;GO:0003017:lymph circulation;GO:0003209:cardiac atrium morphogenesis;GO:0003222:ventricular trabecula myocardium morphogenesis;GO:0003281:ventricular septum development;GO:000704…	GO:0005911:cell-cell junction;GO:0009897:external side of plasma membrane;GO:0009986:cell surface;GO:0016021:integral component of membrane;	GO:0005509:calcium ion binding;GO:0005515:protein binding;	-
ENSMUSG00000024074	2711.48	1.20981	0.0532515	22.7189	2.92e-114	2.43e-112	17	78200248	78376592	+	Crim1	cysteine rich transmembrane BMP regulator 1 (chordin like) [Source:MGI Symbol%3BAcc:MGI:1354756]	GO:0001558:regulation of cell growth;GO:0010951:negative regulation of endopeptidase activity;	GO:0016021:integral component of membrane;GO:0070062:extracellular exosome;	GO:0004867:serine-type endopeptidase inhibitor activity;GO:0005520:insulin-like growth factor binding;GO:0030165:PDZ domain binding;	-
ENSMUSG00000020023	497.961	2.22441	0.0980712	22.6816	6.81e-114	5.65e-112	10	94311949	94590956	+	Tmcc3	transmembrane and coiled coil domains 3 [Source:MGI Symbol%3BAcc:MGI:2442900]	GO:0008150:biological_process;	GO:0005575:cellular_component;GO:0016021:integral component of membrane;	GO:0003674:molecular_function;	-
ENSMUSG00000022996	337.958	-2.73802	0.121303	-22.5717	8.22e-113	6.79e-111	15	98771753	98778150	-	Wnt10b	wingless-type MMTV integration site family%2C member 10B [Source:MGI Symbol%3BAcc:MGI:108061]	GO:0000086:G2/M transition of mitotic cell cycle;GO:0000122:negative regulation of transcription from RNA polymerase II promoter;GO:0002062:chondrocyte differentiation;GO:0006357:regulation of transcription from RNA polymerase II promoter;GO:0006629:lipid metabolic process;GO:0007050:cell cycle arrest;GO:0007165:signal transduction;GO:0007224:smoothened signaling pathway;GO:0007267:cell-cell sign…	GO:0005578:proteinaceous extracellular matrix;GO:0005615:extracellular space;	GO:0005102:receptor binding;GO:0005109:frizzled binding;	K01357
ENSMUSG00000000823	1192.1	-1.4497	0.064229	-22.5708	8.4e-113	6.91e-111	2	181582103	181592803	-	Zfp512b	zinc finger protein 512B [Source:MGI Symbol%3BAcc:MGI:2685478]	GO:0008150:biological_process;	-	GO:0003674:molecular_function;GO:0003676:nucleic acid binding;	-
ENSMUSG00000070691	336.093	-6.41377	0.284257	-22.5633	9.94e-113	8.15e-111	4	135120652	135177990	+	Runx3	runt related transcription factor 3 [Source:MGI Symbol%3BAcc:MGI:102672]	GO:0000122:negative regulation of transcription from RNA polymerase II promoter;GO:0001503:ossification;GO:0002062:chondrocyte differentiation;GO:0006468:protein phosphorylation;GO:0007411:axon guidance;GO:0030097:hemopoiesis;GO:0031069:hair follicle morphogenesis;GO:0031175:neuron projection development;GO:0032609:interferon-gamma production;GO:0042789:mRNA transcription from RNA polymerase II p…	GO:0000790:nuclear chromatin;GO:0005634:nucleus;GO:0005654:nucleoplasm;GO:0005730:nucleolus;GO:0005737:cytoplasm;GO:0005829:cytosol;GO:0043231:intracellular membrane-bounded organelle;	GO:0000977:RNA polymerase II regulatory region sequence-specific DNA binding;GO:0000981:sequence-specific DNA binding RNA polymerase II transcription factor activity;GO:0003677:DNA binding;GO:0005515:protein binding;GO:0005524:ATP binding;GO:0042826:histone deacetylase binding;GO:0046332:SMAD binding;	K09279
ENSMUSG00000032261	281.125	-5.51464	0.244428	-22.5614	1.04e-112	8.47e-111	9	83548327	83638801	+	Sh3bgrl2	SH3 domain binding glutamic acid-rich protein like 2 [Source:MGI Symbol%3BAcc:MGI:1915350]	GO:0008150:biological_process;	GO:0005654:nucleoplasm;GO:0005737:cytoplasm;GO:0031965:nuclear membrane;GO:0070062:extracellular exosome;	GO:0005515:protein binding;GO:0017124:SH3 domain binding;	-
ENSMUSG00000024803	1990.23	-1.23032	0.0545582	-22.5505	1.33e-112	1.08e-110	19	36111965	36119844	-	Ankrd1	ankyrin repeat domain 1 (cardiac muscle) [Source:MGI Symbol%3BAcc:MGI:1097717]	GO:0000122:negative regulation of transcription from RNA polymerase II promoter;GO:0006357:regulation of transcription from RNA polymerase II promoter;GO:0010976:positive regulation of neuron projection development;GO:0035690:cellular response to drug;GO:0035914:skeletal muscle cell differentiation;GO:0035994:response to muscle stretch;GO:0043065:positive regulation of apoptotic process;GO:004351…	GO:0001650:fibrillar center;GO:0005634:nucleus;GO:0005667:transcription factor complex;GO:0005737:cytoplasm;GO:0005829:cytosol;GO:0030016:myofibril;GO:0031674:I band;	GO:0001085:RNA polymerase II transcription factor binding;GO:0001105:RNA polymerase II transcription coactivator activity;GO:0002039:p53 binding;GO:0003677:DNA binding;GO:0003714:transcription corepressor activity;GO:0005515:protein binding;GO:0031432:titin binding;GO:0042826:histone deacetylase binding;GO:0061629:RNA polymerase II sequence-specific DNA binding transcription factor binding;GO:007…	K21433
ENSMUSG00000062184	2140.69	1.06756	0.0474666	22.4908	5.11e-112	4.13e-110	X	51387212	51681856	-	Hs6st2	heparan sulfate 6-O-sulfotransferase 2 [Source:MGI Symbol%3BAcc:MGI:1354959]	GO:0015015:heparan sulfate proteoglycan biosynthetic process, enzymatic modification;	GO:0005654:nucleoplasm;GO:0016021:integral component of membrane;GO:0070062:extracellular exosome;	GO:0017095:heparan sulfate 6-O-sulfotransferase activity;	K08102
ENSMUSG00000020009	1111.4	1.33987	0.0596326	22.4688	8.38e-112	6.75e-110	10	19591949	19610229	+	Ifngr1	interferon gamma receptor 1 [Source:MGI Symbol%3BAcc:MGI:107655]	GO:0019221:cytokine-mediated signaling pathway;GO:0051607:defense response to virus;	GO:0005783:endoplasmic reticulum;GO:0005886:plasma membrane;GO:0014069:postsynaptic density;GO:0016021:integral component of membrane;GO:0030425:dendrite;GO:0031982:vesicle;GO:0043231:intracellular membrane-bounded organelle;	GO:0004896:cytokine receptor activity;GO:0019955:cytokine binding;	-
ENSMUSG00000003746	259.315	6.05409	0.269614	22.4546	1.15e-111	9.25e-110	10	53904785	54076609	-	Man1a	mannosidase 1%2C alpha [Source:MGI Symbol%3BAcc:MGI:104677]	-	-	-	K01230
ENSMUSG00000052837	2461.22	-1.3466	0.0599845	-22.4491	1.31e-111	1.04e-109	8	84974484	84978718	-	Junb	jun B proto-oncogene [Source:MGI Symbol%3BAcc:MGI:96647]	GO:0000122:negative regulation of transcription from RNA polymerase II promoter;GO:0001570:vasculogenesis;GO:0001649:osteoblast differentiation;GO:0001701:in utero embryonic development;GO:0001829:trophectodermal cell differentiation;GO:0006355:regulation of transcription, DNA-templated;GO:0006366:transcription from RNA polymerase II promoter;GO:0009314:response to radiation;GO:0009612:response t…	GO:0000790:nuclear chromatin;GO:0005654:nucleoplasm;GO:0005667:transcription factor complex;GO:0035976:AP1 complex;	GO:0000977:RNA polymerase II regulatory region sequence-specific DNA binding;GO:0000978:RNA polymerase II core promoter proximal region sequence-specific DNA binding;GO:0001077:RNA polymerase II core promoter proximal region sequence-specific DNA binding transcription factor activity involved in positive regulation of transcription;GO:0003677:DNA binding;GO:0003713:transcription coactivator activ…	K09028
ENSMUSG00000028364	4185.75	1.15174	0.0513802	22.416	2.75e-111	2.18e-109	4	63959785	64047015	-	Tnc	tenascin C [Source:MGI Symbol%3BAcc:MGI:101922]	GO:0001649:osteoblast differentiation;GO:0007155:cell adhesion;GO:0007162:negative regulation of cell adhesion;GO:0007528:neuromuscular junction development;GO:0008284:positive regulation of cell proliferation;GO:0009612:response to mechanical stimulus;GO:0010628:positive regulation of gene expression;GO:0014012:peripheral nervous system axon regeneration;GO:0042060:wound healing;GO:0042475:odont…	GO:0005576:extracellular region;GO:0005604:basement membrane;GO:0005614:interstitial matrix;GO:0005615:extracellular space;GO:0005925:focal adhesion;GO:0016020:membrane;GO:0031012:extracellular matrix;	GO:0001968:fibronectin binding;GO:0045545:syndecan binding;	K01404;K06252
ENSMUSG00000030772	247.209	-4.71185	0.210719	-22.3608	9.48e-111	7.51e-109	7	112116017	112159057	-	Dkk3	dickkopf WNT signaling pathway inhibitor 3 [Source:MGI Symbol%3BAcc:MGI:1354952]	GO:0007275:multicellular organismal development;GO:0016055:Wnt signaling pathway;GO:0032348:negative regulation of aldosterone biosynthetic process;GO:0045892:negative regulation of transcription, DNA-templated;GO:0090090:negative regulation of canonical Wnt signaling pathway;GO:2000065:negative regulation of cortisol biosynthetic process;	GO:0005576:extracellular region;GO:0005615:extracellular space;	-	-
ENSMUSG00000022332	225.592	3.82454	0.171313	22.3249	2.12e-110	1.67e-108	15	68928420	69093512	+	Khdrbs3	KH domain containing%2C RNA binding%2C signal transduction associated 3 [Source:MGI Symbol%3BAcc:MGI:1313312]	GO:0006351:transcription, DNA-templated;GO:0006355:regulation of transcription, DNA-templated;GO:0006397:mRNA processing;GO:0048024:regulation of mRNA splicing, via spliceosome;GO:0051259:protein oligomerization;	GO:0005634:nucleus;GO:0005654:nucleoplasm;	GO:0003723:RNA binding;GO:0017124:SH3 domain binding;GO:0019904:protein domain specific binding;GO:0042802:identical protein binding;	K14942
ENSMUSG00000067928	403.33	2.45325	0.109944	22.3136	2.73e-110	2.14e-108	17	21707741	21725636	+	Zfp760	zinc finger protein 760 [Source:MGI Symbol%3BAcc:MGI:2679257]	GO:0006355:regulation of transcription, DNA-templated;	GO:0005575:cellular_component;GO:0005622:intracellular;	GO:0003676:nucleic acid binding;GO:0003700:sequence-specific DNA binding transcription factor activity;GO:0046872:metal ion binding;	K09228
ENSMUSG00000022575	245.098	-4.61353	0.206919	-22.2964	4.01e-110	3.14e-108	15	75862339	75867404	+	Gsdmd	gasdermin D [Source:MGI Symbol%3BAcc:MGI:1916396]	-	-	-	K20917
ENSMUSG00000016382	5222.32	0.999275	0.0448603	22.2753	6.42e-110	5e-108	X	75785654	75875182	-	Pls3	plastin 3 (T-isoform) [Source:MGI Symbol%3BAcc:MGI:104807]	GO:0051017:actin filament bundle assembly;GO:0051639:actin filament network formation;GO:0051764:actin crosslink formation;GO:0060348:bone development;	GO:0005737:cytoplasm;GO:0005829:cytosol;GO:0005884:actin filament;GO:0005886:plasma membrane;GO:0032432:actin filament bundle;	GO:0005509:calcium ion binding;GO:0051015:actin filament binding;	K17336
ENSMUSG00000063696	2538.4	-4.30464	0.193587	-22.2363	1.53e-109	1.19e-107	8	102864845	102865798	-	Gm8730	predicted pseudogene 8730 [Source:MGI Symbol%3BAcc:MGI:3644565]	-	-	-	K02941
ENSMUSG00000035770	4598.14	-1.05689	0.0475662	-22.2194	2.23e-109	1.72e-107	8	104417680	104443047	-	Dync1li2	dynein%2C cytoplasmic 1 light intermediate chain 2 [Source:MGI Symbol%3BAcc:MGI:107738]	GO:0000226:microtubule cytoskeleton organization;GO:0006810:transport;GO:0007018:microtubule-based movement;GO:0051642:centrosome localization;	GO:0005737:cytoplasm;GO:0005813:centrosome;GO:0005868:cytoplasmic dynein complex;GO:0005874:microtubule;GO:0016020:membrane;	GO:0003777:microtubule motor activity;GO:0005515:protein binding;GO:0005524:ATP binding;GO:0045504:dynein heavy chain binding;	K10416
ENSMUSG00000036779	2223.32	-1.06298	0.0478688	-22.2061	3e-109	2.31e-107	8	88199213	88259722	+	Papd5	PAP associated domain containing 5 [Source:MGI Symbol%3BAcc:MGI:1917820]	GO:0006364:rRNA processing;GO:0006397:mRNA processing;GO:0007049:cell cycle;GO:0032211:negative regulation of telomere maintenance via telomerase;GO:0043630:ncRNA polyadenylation involved in polyadenylation-dependent ncRNA catabolic process;GO:0051301:cell division;GO:0071044:histone mRNA catabolic process;GO:0071897:DNA biosynthetic process;	GO:0005575:cellular_component;GO:0005730:nucleolus;GO:0005737:cytoplasm;	GO:0003677:DNA binding;GO:0003723:RNA binding;GO:0003887:DNA-directed DNA polymerase activity;GO:0004652:polynucleotide adenylyltransferase activity;GO:0046872:metal ion binding;	K03514
ENSMUSG00000035199	2127.06	-1.17533	0.0529747	-22.1866	4.63e-109	3.55e-107	6	97210689	97233315	+	Arl6ip5	ADP-ribosylation factor-like 6 interacting protein 5 [Source:MGI Symbol%3BAcc:MGI:1929501]	GO:0002037:negative regulation of L-glutamate transport;GO:0008631:intrinsic apoptotic signaling pathway in response to oxidative stress;GO:0010917:negative regulation of mitochondrial membrane potential;GO:0015813:L-glutamate transport;GO:0032874:positive regulation of stress-activated MAPK cascade;GO:0043065:positive regulation of apoptotic process;GO:0043280:positive regulation of cysteine-typ…	GO:0005789:endoplasmic reticulum membrane;GO:0005856:cytoskeleton;GO:0005886:plasma membrane;GO:0016020:membrane;GO:0016021:integral component of membrane;GO:0070062:extracellular exosome;	GO:0005515:protein binding;	K20393
ENSMUSG00000050390	782.925	-1.62448	0.0732656	-22.1725	6.33e-109	4.83e-107	4	129219578	129261404	-	C77080	expressed sequence C77080 [Source:MGI Symbol%3BAcc:MGI:2140651]	-	-	-	-
ENSMUSG00000036990	6143.31	-1.15631	0.0522052	-22.1493	1.06e-108	8.06e-107	8	79639618	79677724	+	Otud4	OTU domain containing 4 [Source:MGI Symbol%3BAcc:MGI:1098801]	GO:0071108:protein K48-linked deubiquitination;	GO:0005575:cellular_component;	GO:0003723:RNA binding;GO:0004843:ubiquitin-specific protease activity;	K13718
ENSMUSG00000055301	903.128	-1.82206	0.0822989	-22.1396	1.31e-108	9.96e-107	3	138217760	138233382	+	Adh7	alcohol dehydrogenase 7 (class IV)%2C mu or sigma polypeptide [Source:MGI Symbol%3BAcc:MGI:87926]	GO:0001523:retinoid metabolic process;GO:0006068:ethanol catabolic process;GO:0006069:ethanol oxidation;GO:0009617:response to bacterium;GO:0010430:fatty acid omega-oxidation;GO:0042572:retinol metabolic process;GO:0042573:retinoic acid metabolic process;GO:0045471:response to ethanol;GO:0055114:oxidation-reduction process;GO:1900116:extracellular negative regulation of signal transduction;	GO:0005576:extracellular region;GO:0005622:intracellular;GO:0005829:cytosol;GO:0005886:plasma membrane;	GO:0004022:alcohol dehydrogenase (NAD) activity;GO:0004024:alcohol dehydrogenase activity, zinc-dependent;GO:0004031:aldehyde oxidase activity;GO:0004745:retinol dehydrogenase activity;GO:0008270:zinc ion binding;GO:0016491:oxidoreductase activity;GO:0019841:retinol binding;GO:0035276:ethanol binding;GO:0048019:receptor antagonist activity;	K13951
ENSMUSG00000022799	1172.68	-1.48257	0.0671168	-22.0894	4e-108	3.02e-106	16	38598340	38713274	-	Arhgap31	Rho GTPase activating protein 31 [Source:MGI Symbol%3BAcc:MGI:1333857]	GO:0007264:small GTPase mediated signal transduction;GO:0043547:positive regulation of GTPase activity;	GO:0005622:intracellular;GO:0005925:focal adhesion;GO:0030027:lamellipodium;	GO:0005096:GTPase activator activity;GO:0005515:protein binding;GO:0017124:SH3 domain binding;	K20646
ENSMUSG00000022144	285.625	-3.01564	0.136539	-22.0863	4.28e-108	3.22e-106	15	7811011	7837575	+	Gdnf	glial cell line derived neurotrophic factor [Source:MGI Symbol%3BAcc:MGI:107430]	GO:0001656:metanephros development;GO:0001657:ureteric bud development;GO:0001658:branching involved in ureteric bud morphogenesis;GO:0001755:neural crest cell migration;GO:0001759:organ induction;GO:0001941:postsynaptic membrane organization;GO:0003337:mesenchymal to epithelial transition involved in metanephros morphogenesis;GO:0007169:transmembrane receptor protein tyrosine kinase signaling pa…	GO:0005576:extracellular region;	GO:0005160:transforming growth factor beta receptor binding;GO:0008083:growth factor activity;GO:0042803:protein homodimerization activity;	K05452
ENSMUSG00000003316	5311.6	-0.83535	0.0378593	-22.0646	6.92e-108	5.18e-106	8	111154421	111259216	-	Glg1	golgi apparatus protein 1 [Source:MGI Symbol%3BAcc:MGI:104967]	GO:0010955:negative regulation of protein processing;GO:0030512:negative regulation of transforming growth factor beta receptor signaling pathway;GO:0032330:regulation of chondrocyte differentiation;GO:0060349:bone morphogenesis;	GO:0000139:Golgi membrane;GO:0005578:proteinaceous extracellular matrix;GO:0005794:Golgi apparatus;GO:0005886:plasma membrane;GO:0016020:membrane;GO:0016021:integral component of membrane;GO:0070062:extracellular exosome;	GO:0017134:fibroblast growth factor binding;	K06816
ENSMUSG00000034926	245.408	-4.9172	0.222986	-22.0517	9.21e-108	6.87e-106	4	106561038	106589113	+	Dhcr24	24-dehydrocholesterol reductase [Source:MGI Symbol%3BAcc:MGI:1922004]	GO:0006695:cholesterol biosynthetic process;GO:0006979:response to oxidative stress;GO:0007265:Ras protein signal transduction;GO:0008104:protein localization;GO:0008203:cholesterol metabolic process;GO:0008285:negative regulation of cell proliferation;GO:0009725:response to hormone;GO:0009888:tissue development;GO:0016125:sterol metabolic process;GO:0030539:male genitalia development;GO:0031639:…	GO:0000139:Golgi membrane;GO:0005634:nucleus;GO:0005783:endoplasmic reticulum;GO:0005789:endoplasmic reticulum membrane;GO:0005829:cytosol;GO:0005856:cytoskeleton;GO:0016020:membrane;GO:0016021:integral component of membrane;	GO:0000246:delta24(24-1) sterol reductase activity;GO:0016614:oxidoreductase activity, acting on CH-OH group of donors;GO:0016628:oxidoreductase activity, acting on the CH-CH group of donors, NAD or NADP as acceptor;GO:0019899:enzyme binding;GO:0042605:peptide antigen binding;GO:0050614:delta24-sterol reductase activity;GO:0050660:flavin adenine dinucleotide binding;	K09828
ENSMUSG00000069601	865.915	1.49604	0.0678954	22.0345	1.34e-107	9.99e-106	10	69398773	70027438	+	Ank3	ankyrin 3%2C epithelial [Source:MGI Symbol%3BAcc:MGI:88026]	GO:0000281:mitotic cytokinesis;GO:0007009:plasma membrane organization;GO:0007010:cytoskeleton organization;GO:0007165:signal transduction;GO:0007409:axonogenesis;GO:0007411:axon guidance;GO:0007528:neuromuscular junction development;GO:0010628:positive regulation of gene expression;GO:0010650:positive regulation of cell communication by electrical coupling;GO:0010765:positive regulation of sodiu…	GO:0005764:lysosome;GO:0005886:plasma membrane;GO:0005923:bicellular tight junction;GO:0009925:basal plasma membrane;GO:0009986:cell surface;GO:0014704:intercalated disc;GO:0014731:spectrin-associated cytoskeleton;GO:0016020:membrane;GO:0016323:basolateral plasma membrane;GO:0016328:lateral plasma membrane;GO:0016529:sarcoplasmic reticulum;GO:0030018:Z disc;GO:0030315:T-tubule;GO:0030424:axon;GO:…	GO:0005200:structural constituent of cytoskeleton;GO:0005515:protein binding;GO:0008092:cytoskeletal protein binding;GO:0030507:spectrin binding;GO:0030674:protein binding, bridging;GO:0044325:ion channel binding;GO:0045296:cadherin binding;	K10380
ENSMUSG00000040945	7127.76	-0.850974	0.0386404	-22.0229	1.74e-107	1.29e-105	4	140700541	140723220	+	Rcc2	regulator of chromosome condensation 2 [Source:MGI Symbol%3BAcc:MGI:1919784]	GO:0007049:cell cycle;GO:0007229:integrin-mediated signaling pathway;GO:0010762:regulation of fibroblast migration;GO:0010971:positive regulation of G2/M transition of mitotic cell cycle;GO:0030334:regulation of cell migration;GO:0034260:negative regulation of GTPase activity;GO:0045184:establishment of protein localization;GO:0048041:focal adhesion assembly;GO:0051301:cell division;GO:0051895:ne…	GO:0005634:nucleus;GO:0005730:nucleolus;GO:0005874:microtubule;GO:0005886:plasma membrane;GO:0016020:membrane;GO:0030496:midbody;GO:0031901:early endosome membrane;GO:0034506:chromosome, centromeric core domain;GO:1990023:mitotic spindle midzone;	GO:0003723:RNA binding;GO:0008017:microtubule binding;GO:0019901:protein kinase binding;GO:0019904:protein domain specific binding;GO:0031267:small GTPase binding;GO:0048365:Rac GTPase binding;	-
ENSMUSG00000097906	244.665	-4.62935	0.210306	-22.0124	2.19e-107	1.61e-105	13	67810246	67811200	+	Gm9625	predicted gene 9625 [Source:MGI Symbol%3BAcc:MGI:3780033]	-	-	-	K02941
ENSMUSG00000022438	289.496	2.66617	0.121282	21.9833	4.16e-107	3.06e-105	15	84232043	84315688	+	Parvb	parvin%2C beta [Source:MGI Symbol%3BAcc:MGI:2153063]	GO:0007155:cell adhesion;GO:0030031:cell projection assembly;GO:0030032:lamellipodium assembly;GO:0031532:actin cytoskeleton reorganization;GO:0071963:establishment or maintenance of cell polarity regulating cell shape;	GO:0005856:cytoskeleton;GO:0005886:plasma membrane;GO:0005925:focal adhesion;GO:0030018:Z disc;GO:0030027:lamellipodium;	GO:0003779:actin binding;GO:0005515:protein binding;	K06275
ENSMUSG00000025812	1812.77	-1.1558	0.052622	-21.9642	6.33e-107	4.64e-105	8	127063893	127612286	+	Pard3	par-3 family cell polarity regulator [Source:MGI Symbol%3BAcc:MGI:2135608]	GO:0000226:microtubule cytoskeleton organization;GO:0002092:positive regulation of receptor internalization;GO:0003383:apical constriction;GO:0006612:protein targeting to membrane;GO:0007049:cell cycle;GO:0007163:establishment or maintenance of cell polarity;GO:0010801:negative regulation of peptidyl-threonine phosphorylation;GO:0016337:single organismal cell-cell adhesion;GO:0022011:myelination …	GO:0005737:cytoplasm;GO:0005819:spindle;GO:0005886:plasma membrane;GO:0005911:cell-cell junction;GO:0005912:adherens junction;GO:0005913:cell-cell adherens junction;GO:0005923:bicellular tight junction;GO:0005938:cell cortex;GO:0012505:endomembrane system;GO:0030054:cell junction;GO:0033269:internode region of axon;GO:0043219:lateral loop;GO:0043220:Schmidt-Lanterman incisure;GO:0043234:protein c…	GO:0005080:protein kinase C binding;GO:0005515:protein binding;GO:0005546:phosphatidylinositol-4,5-bisphosphate binding;GO:0005547:phosphatidylinositol-3,4,5-trisphosphate binding;GO:0032266:phosphatidylinositol-3-phosphate binding;	K04237
ENSMUSG00000062397	4307.04	1.03632	0.0472452	21.9349	1.21e-106	8.79e-105	15	36997031	37007402	-	Zfp706	zinc finger protein 706 [Source:MGI Symbol%3BAcc:MGI:1915286]	-	-	-	-
ENSMUSG00000042812	305.009	-6.35175	0.290142	-21.8918	3.11e-106	2.26e-104	8	121084386	121088144	+	Foxf1	forkhead box F1 [Source:MGI Symbol%3BAcc:MGI:1347470]	GO:0000122:negative regulation of transcription from RNA polymerase II promoter;GO:0001568:blood vessel development;GO:0001570:vasculogenesis;GO:0001701:in utero embryonic development;GO:0001756:somitogenesis;GO:0001763:morphogenesis of a branching structure;GO:0002053:positive regulation of mesenchymal cell proliferation;GO:0003197:endocardial cushion development;GO:0003214:cardiac left ventricl…	GO:0005634:nucleus;	GO:0000977:RNA polymerase II regulatory region sequence-specific DNA binding;GO:0001228:RNA polymerase II transcription regulatory region sequence-specific DNA binding transcription factor activity involved in positive regulation of transcription;GO:0003677:DNA binding;GO:0003705:RNA polymerase II distal enhancer sequence-specific DNA binding transcription factor activity;GO:0044212:transcription…	K09399
ENSMUSG00000031387	796.43	1.62778	0.0745425	21.837	1.03e-105	7.48e-104	X	73922121	73930850	-	Renbp	renin binding protein [Source:MGI Symbol%3BAcc:MGI:105940]	GO:0006044:N-acetylglucosamine metabolic process;GO:0006051:N-acetylmannosamine metabolic process;GO:0010951:negative regulation of endopeptidase activity;GO:0019262:N-acetylneuraminate catabolic process;	GO:0070062:extracellular exosome;	GO:0004866:endopeptidase inhibitor activity;GO:0005524:ATP binding;GO:0042803:protein homodimerization activity;GO:0050121:N-acylglucosamine 2-epimerase activity;	K01787
ENSMUSG00000022103	239.679	-4.66139	0.213729	-21.8098	1.87e-105	1.35e-103	14	70890130	70979838	+	Gfra2	glial cell line derived neurotrophic factor family receptor alpha 2 [Source:MGI Symbol%3BAcc:MGI:1195462]	GO:0007169:transmembrane receptor protein tyrosine kinase signaling pathway;GO:0007399:nervous system development;GO:0031953:negative regulation of protein autophosphorylation;GO:0033139:regulation of peptidyl-serine phosphorylation of STAT protein;GO:0033141:positive regulation of peptidyl-serine phosphorylation of STAT protein;GO:0035860:glial cell-derived neurotrophic factor receptor signaling…	GO:0005886:plasma membrane;GO:0031225:anchored component of membrane;	GO:0016167:glial cell-derived neurotrophic factor receptor activity;	-
ENSMUSG00000020312	826.9	1.63379	0.0750312	21.7748	4.02e-105	2.89e-103	10	79618051	79637918	-	Shc2	SHC (Src homology 2 domain containing) transforming protein 2 [Source:MGI Symbol%3BAcc:MGI:106180]	GO:0000187:activation of MAPK activity;GO:0007169:transmembrane receptor protein tyrosine kinase signaling pathway;GO:0035556:intracellular signal transduction;	GO:0005622:intracellular;GO:0005886:plasma membrane;	GO:0030971:receptor tyrosine kinase binding;	K17447;K06279
ENSMUSG00000018209	1342.05	-1.33382	0.0614979	-21.6889	2.61e-104	1.87e-102	2	164070322	164155524	+	Stk4	serine/threonine kinase 4 [Source:MGI Symbol%3BAcc:MGI:1929004]	GO:0000902:cell morphogenesis;GO:0001569:patterning of blood vessels;GO:0001841:neural tube formation;GO:0001934:positive regulation of protein phosphorylation;GO:0003157:endocardium development;GO:0006468:protein phosphorylation;GO:0006915:apoptotic process;GO:0007346:regulation of mitotic cell cycle;GO:0007417:central nervous system development;GO:0008285:negative regulation of cell proliferati…	GO:0005634:nucleus;GO:0005654:nucleoplasm;GO:0005737:cytoplasm;GO:0005829:cytosol;GO:0016604:nuclear body;GO:0043234:protein complex;	GO:0000287:magnesium ion binding;GO:0004672:protein kinase activity;GO:0004674:protein serine/threonine kinase activity;GO:0005515:protein binding;GO:0005524:ATP binding;GO:0008134:transcription factor binding;GO:0042802:identical protein binding;GO:0042803:protein homodimerization activity;GO:0046983:protein dimerization activity;	-
ENSMUSG00000004872	244.859	6.40978	0.296358	21.6285	9.68e-104	6.9e-102	1	78101267	78197134	-	Pax3	paired box 3 [Source:MGI Symbol%3BAcc:MGI:97487]	GO:0000122:negative regulation of transcription from RNA polymerase II promoter;GO:0001755:neural crest cell migration;GO:0001843:neural tube closure;GO:0006351:transcription, DNA-templated;GO:0007507:heart development;GO:0007517:muscle organ development;GO:0008283:cell proliferation;GO:0008284:positive regulation of cell proliferation;GO:0014029:neural crest formation;GO:0014807:regulation of so…	GO:0005634:nucleus;GO:0005654:nucleoplasm;GO:0005667:transcription factor complex;	GO:0003682:chromatin binding;GO:0003700:sequence-specific DNA binding transcription factor activity;GO:0003705:RNA polymerase II distal enhancer sequence-specific DNA binding transcription factor activity;GO:0005515:protein binding;GO:0043565:sequence-specific DNA binding;	K09381
ENSMUSG00000031575	3044.54	-0.919574	0.0425268	-21.6234	1.08e-103	7.68e-102	8	25815996	25847694	-	Ash2l	ash2 (absent%2C small%2C or homeotic)-like (Drosophila) [Source:MGI Symbol%3BAcc:MGI:1344416]	GO:0006351:transcription, DNA-templated;GO:0006974:cellular response to DNA damage stimulus;GO:0008284:positive regulation of cell proliferation;GO:0043627:response to estrogen;GO:0045944:positive regulation of transcription from RNA polymerase II promoter;GO:0048096:chromatin-mediated maintenance of transcription;GO:0051568:histone H3-K4 methylation;	GO:0005634:nucleus;GO:0005654:nucleoplasm;GO:0005719:nuclear euchromatin;GO:0035097:histone methyltransferase complex;GO:0044666:MLL3/4 complex;GO:0048188:Set1C/COMPASS complex;GO:0071339:MLL1 complex;	GO:0005515:protein binding;GO:0008013:beta-catenin binding;GO:0042800:histone methyltransferase activity (H3-K4 specific);GO:0044212:transcription regulatory region DNA binding;GO:0046872:metal ion binding;GO:1990188:euchromatin binding;	K14964
ENSMUSG00000031762	2176.58	-2.36513	0.109466	-21.6061	1.57e-103	1.11e-101	8	94172664	94173568	+	Mt2	metallothionein 2 [Source:MGI Symbol%3BAcc:MGI:97172]	GO:0006882:cellular zinc ion homeostasis;GO:0007263:nitric oxide mediated signal transduction;GO:0010038:response to metal ion;GO:0010273:detoxification of copper ion;GO:0035690:cellular response to drug;GO:0036016:cellular response to interleukin-3;GO:0036018:cellular response to erythropoietin;GO:0045926:negative regulation of growth;GO:0048143:astrocyte activation;GO:0071294:cellular response …	GO:0005634:nucleus;GO:0005737:cytoplasm;GO:0005829:cytosol;GO:0048471:perinuclear region of cytoplasm;	GO:0008144:drug binding;GO:0008270:zinc ion binding;GO:0046870:cadmium ion binding;	-
ENSMUSG00000057506	698.409	1.68584	0.0782509	21.544	6.03e-103	4.25e-101	19	44139266	44146446	-	Bloc1s2	biogenesis of lysosomal organelles complex-1%2C subunit 2 [Source:MGI Symbol%3BAcc:MGI:1920939]	GO:0008089:anterograde axon cargo transport;GO:0008284:positive regulation of cell proliferation;GO:0008625:extrinsic apoptotic signaling pathway via death domain receptors;GO:0031175:neuron projection development;GO:0032418:lysosome localization;GO:0045893:positive regulation of transcription, DNA-templated;GO:0048490:anterograde synaptic vesicle transport;GO:0055114:oxidation-reduction process;…	GO:0000930:gamma-tubulin complex;GO:0005634:nucleus;GO:0005739:mitochondrion;GO:0005765:lysosomal membrane;GO:0005813:centrosome;GO:0005829:cytosol;GO:0031083:BLOC-1 complex;GO:1904115:axon cytoplasm;	GO:0008022:protein C-terminus binding;GO:0016491:oxidoreductase activity;GO:0043015:gamma-tubulin binding;	K16750
ENSMUSG00000078452	260.307	6.68584	0.310721	21.5172	1.08e-102	7.55e-101	10	22360552	22374139	+	Raet1d	retinoic acid early transcript delta [Source:MGI Symbol%3BAcc:MGI:1861032]	GO:0001913:T cell mediated cytotoxicity;GO:0042267:natural killer cell mediated cytotoxicity;	GO:0009897:external side of plasma membrane;GO:0046658:anchored component of plasma membrane;	GO:0005515:protein binding;GO:0046703:natural killer cell lectin-like receptor binding;	K07987
ENSMUSG00000020696	455.272	-2.08486	0.0969156	-21.5121	1.2e-102	8.39e-101	11	82802449	82871210	-	Rffl	ring finger and FYVE like domain containing protein [Source:MGI Symbol%3BAcc:MGI:1914588]	GO:0006511:ubiquitin-dependent protein catabolic process;GO:0006886:intracellular protein transport;GO:0006915:apoptotic process;GO:0010762:regulation of fibroblast migration;GO:0010804:negative regulation of tumor necrosis factor-mediated signaling pathway;GO:0042787:protein ubiquitination involved in ubiquitin-dependent protein catabolic process;GO:0043161:proteasome-mediated ubiquitin-dependen…	GO:0002947:tumor necrosis factor receptor superfamily complex;GO:0005737:cytoplasm;GO:0005829:cytosol;GO:0005886:plasma membrane;GO:0010008:endosome membrane;GO:0016020:membrane;GO:0031410:cytoplasmic vesicle;GO:0055038:recycling endosome membrane;	GO:0002020:protease binding;GO:0002039:p53 binding;GO:0019901:protein kinase binding;GO:0031625:ubiquitin protein ligase binding;GO:0046872:metal ion binding;GO:0061630:ubiquitin protein ligase activity;	K20804
ENSMUSG00000005125	3919.81	1.03873	0.0485798	21.3818	1.97e-101	1.37e-99	15	66929321	66969640	-	Ndrg1	N-myc downstream regulated gene 1 [Source:MGI Symbol%3BAcc:MGI:1341799]	GO:0007165:signal transduction;GO:0008285:negative regulation of cell proliferation;GO:0030330:DNA damage response, signal transduction by p53 class mediator;GO:0032287:peripheral nervous system myelin maintenance;GO:0045576:mast cell activation;GO:0071456:cellular response to hypoxia;GO:0090232:positive regulation of spindle checkpoint;	GO:0005634:nucleus;GO:0005737:cytoplasm;GO:0005813:centrosome;GO:0005829:cytosol;GO:0005874:microtubule;GO:0005886:plasma membrane;GO:0005913:cell-cell adherens junction;GO:0015630:microtubule cytoskeleton;GO:0043209:myelin sheath;GO:0048471:perinuclear region of cytoplasm;GO:0055038:recycling endosome membrane;GO:0070062:extracellular exosome;	GO:0008017:microtubule binding;GO:0017137:Rab GTPase binding;GO:0043015:gamma-tubulin binding;GO:0045296:cadherin binding;	-
ENSMUSG00000066607	527.625	1.92475	0.0901677	21.3464	4.22e-101	2.93e-99	9	58488603	58499780	+	6030419C18Rik	RIKEN cDNA 6030419C18 gene [Source:MGI Symbol%3BAcc:MGI:2442108]	-	-	-	-
ENSMUSG00000031672	5163.41	-0.851982	0.0399165	-21.3441	4.42e-101	3.06e-99	8	95864134	95888547	-	Got2	glutamatic-oxaloacetic transaminase 2%2C mitochondrial [Source:MGI Symbol%3BAcc:MGI:95792]	GO:0006103:2-oxoglutarate metabolic process;GO:0006107:oxaloacetate metabolic process;GO:0006531:aspartate metabolic process;GO:0006532:aspartate biosynthetic process;GO:0006533:aspartate catabolic process;GO:0006536:glutamate metabolic process;GO:0015908:fatty acid transport;GO:0019550:glutamate catabolic process to aspartate;GO:0019551:glutamate catabolic process to 2-oxoglutarate;GO:0045471:re…	GO:0005739:mitochondrion;GO:0005743:mitochondrial inner membrane;GO:0005759:mitochondrial matrix;GO:0005886:plasma membrane;GO:0009986:cell surface;GO:0043204:perikaryon;GO:0043209:myelin sheath;GO:0043234:protein complex;GO:0070062:extracellular exosome;	GO:0003723:RNA binding;GO:0004069:L-aspartate:2-oxoglutarate aminotransferase activity;GO:0005543:phospholipid binding;GO:0016212:kynurenine-oxoglutarate transaminase activity;GO:0016597:amino acid binding;GO:0019899:enzyme binding;GO:0030170:pyridoxal phosphate binding;GO:0042803:protein homodimerization activity;GO:0080130:L-phenylalanine:2-oxoglutarate aminotransferase activity;	K14455
ENSMUSG00000068036	3354.06	-0.897037	0.0420607	-21.3272	6.35e-101	4.38e-99	17	13760539	13906150	+	Afdn	afadin%2C adherens junction formation factor [Source:MGI Symbol%3BAcc:MGI:1314653]	GO:0007155:cell adhesion;GO:0007165:signal transduction;GO:0021537:telencephalon development;GO:0021987:cerebral cortex development;GO:0032880:regulation of protein localization;GO:0034334:adherens junction maintenance;GO:0043547:positive regulation of GTPase activity;GO:0048854:brain morphogenesis;GO:0048872:homeostasis of number of cells;GO:0060019:radial glial cell differentiation;GO:0060563:n…	GO:0005654:nucleoplasm;GO:0005737:cytoplasm;GO:0005829:cytosol;GO:0005886:plasma membrane;GO:0005911:cell-cell junction;GO:0005912:adherens junction;GO:0005913:cell-cell adherens junction;GO:0016607:nuclear speck;GO:0030054:cell junction;GO:0043296:apical junction complex;GO:0045177:apical part of cell;	GO:0005515:protein binding;GO:0017016:Ras GTPase binding;GO:0045296:cadherin binding;GO:0050839:cell adhesion molecule binding;	K05702
ENSMUSG00000026074	5145.07	-0.992396	0.0466043	-21.2941	1.29e-100	8.85e-99	1	39900913	40026310	+	Map4k4	mitogen-activated protein kinase kinase kinase kinase 4 [Source:MGI Symbol%3BAcc:MGI:1349394]	GO:0000165:MAPK cascade;GO:0000185:activation of MAPKKK activity;GO:0006468:protein phosphorylation;GO:0006950:response to stress;GO:0007346:regulation of mitotic cell cycle;GO:0031098:stress-activated protein kinase signaling cascade;GO:0035556:intracellular signal transduction;GO:0042981:regulation of apoptotic process;GO:0043066:negative regulation of apoptotic process;GO:0046328:regulation of…	GO:0005737:cytoplasm;	GO:0004111:creatine kinase activity;GO:0004674:protein serine/threonine kinase activity;GO:0005524:ATP binding;GO:0008349:MAP kinase kinase kinase kinase activity;	K04407
ENSMUSG00000021792	187.086	4.04887	0.190413	21.2636	2.47e-100	1.69e-98	14	40993740	41013788	-	Fam213a	family with sequence similarity 213%2C member A [Source:MGI Symbol%3BAcc:MGI:1917814]	GO:0045670:regulation of osteoclast differentiation;GO:0055114:oxidation-reduction process;	GO:0005737:cytoplasm;GO:0005739:mitochondrion;GO:0070062:extracellular exosome;	GO:0016209:antioxidant activity;	-
ENSMUSG00000037010	546.844	1.88717	0.0888426	21.2418	3.93e-100	2.68e-98	X	48025146	48034853	-	Apln	apelin [Source:MGI Symbol%3BAcc:MGI:1353624]	GO:0002026:regulation of the force of heart contraction;GO:0007186:G-protein coupled receptor signaling pathway;GO:0008284:positive regulation of cell proliferation;GO:0023052:signaling;GO:0031652:positive regulation of heat generation;GO:0042327:positive regulation of phosphorylation;GO:0042756:drinking behavior;GO:0043576:regulation of respiratory gaseous exchange;GO:0045776:negative regulation…	GO:0005576:extracellular region;GO:0005615:extracellular space;GO:0048471:perinuclear region of cytoplasm;	GO:0001664:G-protein coupled receptor binding;GO:0005102:receptor binding;GO:0005179:hormone activity;GO:0031704:apelin receptor binding;	K05225
ENSMUSG00000034807	3264.4	-0.917641	0.0432207	-21.2315	4.88e-100	3.32e-98	8	71610998	71624911	+	Colgalt1	collagen beta(1-O)galactosyltransferase 1 [Source:MGI Symbol%3BAcc:MGI:1924348]	-	GO:0005788:endoplasmic reticulum lumen;GO:0016020:membrane;	GO:0003674:molecular_function;GO:0050211:procollagen galactosyltransferase activity;	K11703
ENSMUSG00000021360	471.06	-1.97839	0.0933179	-21.2005	9.44e-100	6.39e-98	13	40859768	40960891	+	Gcnt2	glucosaminyl (N-acetyl) transferase 2%2C I-branching enzyme [Source:MGI Symbol%3BAcc:MGI:1100870]	GO:0006486:protein glycosylation;GO:0007179:transforming growth factor beta receptor signaling pathway;GO:0008284:positive regulation of cell proliferation;GO:0010608:posttranscriptional regulation of gene expression;GO:0010718:positive regulation of epithelial to mesenchymal transition;GO:0010812:negative regulation of cell-substrate adhesion;GO:0030335:positive regulation of cell migration;GO:0…	GO:0000139:Golgi membrane;GO:0016021:integral component of membrane;	GO:0008109:N-acetyllactosaminide beta-1,6-N-acetylglucosaminyltransferase activity;GO:0008375:acetylglucosaminyltransferase activity;	K00742
ENSMUSG00000031691	3723.86	-1.16199	0.0548214	-21.1959	1.04e-99	7.04e-98	8	85036915	85057583	+	Tnpo2	transportin 2 (importin 3%2C karyopherin beta 2b) [Source:MGI Symbol%3BAcc:MGI:2384849]	GO:0000060:protein import into nucleus, translocation;GO:0006606:protein import into nucleus;GO:0006607:NLS-bearing protein import into nucleus;GO:0006610:ribosomal protein import into nucleus;GO:0051148:negative regulation of muscle cell differentiation;	GO:0005737:cytoplasm;GO:0031965:nuclear membrane;GO:0034399:nuclear periphery;	GO:0005515:protein binding;GO:0008139:nuclear localization sequence binding;GO:0008536:Ran GTPase binding;GO:0008565:protein transporter activity;	K18727
ENSMUSG00000040562	287.078	2.75465	0.130028	21.1851	1.31e-99	8.81e-98	3	107981702	107986453	-	Gstm2	glutathione S-transferase%2C mu 2 [Source:MGI Symbol%3BAcc:MGI:95861]	GO:0006749:glutathione metabolic process;GO:0018916:nitrobenzene metabolic process;GO:0042178:xenobiotic catabolic process;GO:0070458:cellular detoxification of nitrogen compound;	GO:0005737:cytoplasm;	GO:0004364:glutathione transferase activity;GO:0019899:enzyme binding;GO:0042803:protein homodimerization activity;GO:0043295:glutathione binding;GO:0046982:protein heterodimerization activity;	K00799
ENSMUSG00000028023	246.499	6.70059	0.316625	21.1625	2.12e-99	1.42e-97	3	129199878	129219591	+	Pitx2	paired-like homeodomain transcription factor 2 [Source:MGI Symbol%3BAcc:MGI:109340]	GO:0000122:negative regulation of transcription from RNA polymerase II promoter;GO:0001569:patterning of blood vessels;GO:0001570:vasculogenesis;GO:0001701:in utero embryonic development;GO:0001764:neuron migration;GO:0002074:extraocular skeletal muscle development;GO:0003171:atrioventricular valve development;GO:0003253:cardiac neural crest cell migration involved in outflow tract morphogenesis;…	GO:0005634:nucleus;GO:0005667:transcription factor complex;GO:0005737:cytoplasm;	GO:0000976:transcription regulatory region sequence-specific DNA binding;GO:0000978:RNA polymerase II core promoter proximal region sequence-specific DNA binding;GO:0000981:sequence-specific DNA binding RNA polymerase II transcription factor activity;GO:0001077:RNA polymerase II core promoter proximal region sequence-specific DNA binding transcription factor activity involved in positive regulati…	K04686
ENSMUSG00000015709	209.477	3.48379	0.164943	21.1212	5.08e-99	3.4e-97	7	84246278	84410176	-	Arnt2	aryl hydrocarbon receptor nuclear translocator 2 [Source:MGI Symbol%3BAcc:MGI:107188]	GO:0001666:response to hypoxia;GO:0001701:in utero embryonic development;GO:0006355:regulation of transcription, DNA-templated;GO:0006366:transcription from RNA polymerase II promoter;GO:0007165:signal transduction;GO:0007417:central nervous system development;GO:0007420:brain development;GO:0008284:positive regulation of cell proliferation;GO:0009410:response to xenobiotic stimulus;GO:0009636:re…	GO:0005634:nucleus;GO:0005667:transcription factor complex;GO:0005737:cytoplasm;	GO:0000978:RNA polymerase II core promoter proximal region sequence-specific DNA binding;GO:0000981:sequence-specific DNA binding RNA polymerase II transcription factor activity;GO:0001077:RNA polymerase II core promoter proximal region sequence-specific DNA binding transcription factor activity involved in positive regulation of transcription;GO:0003677:DNA binding;GO:0003700:sequence-specific D…	K15589
ENSMUSG00000061758	234.33	2.96551	0.140723	21.0734	1.4e-98	9.29e-97	6	34384218	34396950	+	Akr1b10	aldo-keto reductase family 1%2C member B10 (aldose reductase) [Source:MGI Symbol%3BAcc:MGI:1915111]	GO:0055114:oxidation-reduction process;	GO:0005739:mitochondrion;	GO:0016491:oxidoreductase activity;	K00085
ENSMUSG00000022255	9765.76	0.797464	0.0378491	21.0695	1.51e-98	1e-96	15	34082694	34142386	+	Mtdh	metadherin [Source:MGI Symbol%3BAcc:MGI:1914404]	GO:0000122:negative regulation of transcription from RNA polymerase II promoter;GO:0010508:positive regulation of autophagy;GO:0031663:lipopolysaccharide-mediated signaling pathway;GO:0043066:negative regulation of apoptotic process;GO:0043123:positive regulation of I-kappaB kinase/NF-kappaB signaling;GO:0045766:positive regulation of angiogenesis;GO:0051092:positive regulation of NF-kappaB trans…	GO:0001650:fibrillar center;GO:0005634:nucleus;GO:0005730:nucleolus;GO:0005737:cytoplasm;GO:0005783:endoplasmic reticulum;GO:0005789:endoplasmic reticulum membrane;GO:0005923:bicellular tight junction;GO:0016021:integral component of membrane;GO:0016324:apical plasma membrane;GO:0016604:nuclear body;GO:0031965:nuclear membrane;GO:0046581:intercellular canaliculus;GO:0048471:perinuclear region of …	GO:0001085:RNA polymerase II transcription factor binding;GO:0003713:transcription coactivator activity;GO:0003723:RNA binding;GO:0003725:double-stranded RNA binding;GO:0005515:protein binding;GO:0051059:NF-kappaB binding;	-
ENSMUSG00000027737	1876.82	-1.19417	0.0566791	-21.069	1.53e-98	1.01e-96	3	49892526	50443614	-	Slc7a11	solute carrier family 7 (cationic amino acid transporter%2C y+ system)%2C member 11 [Source:MGI Symbol%3BAcc:MGI:1347355]	GO:0006979:response to oxidative stress;GO:0007420:brain development;GO:0009636:response to toxic substance;GO:0035094:response to nicotine;GO:0070306:lens fiber cell differentiation;GO:0070527:platelet aggregation;GO:0089711:L-glutamate transmembrane transport;	GO:0005791:rough endoplasmic reticulum;GO:0005856:cytoskeleton;GO:0005887:integral component of plasma membrane;GO:0009986:cell surface;	GO:0015327:cystine:glutamate antiporter activity;	K13869
ENSMUSG00000000901	1270.51	1.26455	0.060053	21.0572	1.96e-98	1.29e-96	10	75923222	75936496	-	Mmp11	matrix metallopeptidase 11 [Source:MGI Symbol%3BAcc:MGI:97008]	GO:0006508:proteolysis;GO:0007275:multicellular organismal development;GO:0030198:extracellular matrix organization;GO:0030199:collagen fibril organization;GO:0030574:collagen catabolic process;GO:0045599:negative regulation of fat cell differentiation;GO:0071711:basement membrane organization;	GO:0005578:proteinaceous extracellular matrix;	GO:0004222:metalloendopeptidase activity;GO:0008237:metallopeptidase activity;GO:0008270:zinc ion binding;	K07993
ENSMUSG00000002489	250.183	-3.2203	0.153296	-21.0071	5.65e-98	3.71e-96	16	89787111	89980080	-	Tiam1	T cell lymphoma invasion and metastasis 1 [Source:MGI Symbol%3BAcc:MGI:103306]	GO:0007160:cell-matrix adhesion;GO:0007264:small GTPase mediated signal transduction;GO:0008284:positive regulation of cell proliferation;GO:0010717:regulation of epithelial to mesenchymal transition;GO:0010976:positive regulation of neuron projection development;GO:0016477:cell migration;GO:0016601:Rac protein signal transduction;GO:0030335:positive regulation of cell migration;GO:0031547:brain-…	GO:0005829:cytosol;GO:0005874:microtubule;GO:0005886:plasma membrane;GO:0005911:cell-cell junction;GO:0031234:extrinsic component of cytoplasmic side of plasma membrane;GO:0044291:cell-cell contact zone;GO:0060091:kinocilium;	GO:0005057:receptor signaling protein activity;GO:0005085:guanyl-nucleotide exchange factor activity;GO:0005515:protein binding;GO:0005543:phospholipid binding;GO:0019900:kinase binding;GO:0030676:Rac guanyl-nucleotide exchange factor activity;GO:0030971:receptor tyrosine kinase binding;GO:0046875:ephrin receptor binding;	K05731
ENSMUSG00000031750	251.501	-3.0765	0.146479	-21.0031	6.15e-98	4.02e-96	8	110741829	110805924	-	Il34	interleukin 34 [Source:MGI Symbol%3BAcc:MGI:1923777]	GO:0001934:positive regulation of protein phosphorylation;GO:0006954:inflammatory response;GO:0008284:positive regulation of cell proliferation;GO:0045087:innate immune response;GO:0045651:positive regulation of macrophage differentiation;GO:0045657:positive regulation of monocyte differentiation;	GO:0005615:extracellular space;	GO:0005125:cytokine activity;GO:0005157:macrophage colony-stimulating factor receptor binding;GO:0008083:growth factor activity;	-
ENSMUSG00000028961	4637.36	-0.834285	0.0397638	-20.981	9.78e-98	6.37e-96	4	149149991	149166771	-	Pgd	phosphogluconate dehydrogenase [Source:MGI Symbol%3BAcc:MGI:97553]	GO:0006098:pentose-phosphate shunt;GO:0009051:pentose-phosphate shunt, oxidative branch;GO:0019322:pentose biosynthetic process;GO:0019521:D-gluconate metabolic process;GO:0055114:oxidation-reduction process;	GO:0005634:nucleus;GO:0005737:cytoplasm;GO:0070062:extracellular exosome;	GO:0004616:phosphogluconate dehydrogenase (decarboxylating) activity;	K00033
ENSMUSG00000024597	1368.55	1.35363	0.064525	20.9784	1.03e-97	6.71e-96	18	57878678	57946821	+	Slc12a2	solute carrier family 12%2C member 2 [Source:MGI Symbol%3BAcc:MGI:101924]	GO:0006813:potassium ion transport;GO:0006814:sodium ion transport;GO:0015696:ammonium transport;GO:0030321:transepithelial chloride transport;GO:0035264:multicellular organism growth;GO:0050910:detection of mechanical stimulus involved in sensory perception of sound;GO:0060444:branching involved in mammary gland duct morphogenesis;GO:0060763:mammary duct terminal end bud growth;GO:0070634:transe…	GO:0016021:integral component of membrane;GO:0016323:basolateral plasma membrane;GO:0016324:apical plasma membrane;GO:0070062:extracellular exosome;GO:1903561:extracellular vesicle;	GO:0005515:protein binding;GO:0008519:ammonium transmembrane transporter activity;GO:0015377:cation:chloride symporter activity;GO:0019901:protein kinase binding;	K10951
ENSMUSG00000058355	8595.64	-0.872302	0.0416539	-20.9417	2.23e-97	1.45e-95	8	79683462	79711740	-	Abce1	ATP-binding cassette%2C sub-family E (OABP)%2C member 1 [Source:MGI Symbol%3BAcc:MGI:1195458]	GO:0000054:ribosomal subunit export from nucleus;GO:0006413:translational initiation;GO:0006415:translational termination;GO:0060702:negative regulation of endoribonuclease activity;	GO:0005737:cytoplasm;GO:0005739:mitochondrion;GO:0005829:cytosol;GO:0005852:eukaryotic translation initiation factor 3 complex;GO:0016020:membrane;	GO:0005506:iron ion binding;GO:0005524:ATP binding;GO:0016887:ATPase activity;GO:0043024:ribosomal small subunit binding;GO:0060698:endoribonuclease inhibitor activity;	K06174;K09817
ENSMUSG00000024268	1029.57	1.53955	0.0736926	20.8915	6.4e-97	4.13e-95	18	25477632	25753983	-	Celf4	CUGBP%2C Elav-like family member 4 [Source:MGI Symbol%3BAcc:MGI:1932407]	GO:0000380:alternative mRNA splicing, via spliceosome;GO:0000381:regulation of alternative mRNA splicing, via spliceosome;GO:0006376:mRNA splice site selection;GO:0048025:negative regulation of mRNA splicing, via spliceosome;GO:0048026:positive regulation of mRNA splicing, via spliceosome;GO:0090394:negative regulation of excitatory postsynaptic membrane potential;GO:1902866:regulation of retina …	GO:0005634:nucleus;GO:0005737:cytoplasm;	GO:0003729:mRNA binding;GO:0036002:pre-mRNA binding;GO:0042835:BRE binding;	K13207
ENSMUSG00000054823	2210.1	-1.07266	0.0514448	-20.8508	1.5e-96	9.65e-95	8	25601601	25719667	+	Nsd3	nuclear receptor binding SET domain protein 3 [Source:MGI Symbol%3BAcc:MGI:2142581]	GO:0006351:transcription, DNA-templated;GO:0016571:histone methylation;GO:0045892:negative regulation of transcription, DNA-templated;GO:0051568:histone H3-K4 methylation;GO:0070734:histone H3-K27 methylation;	GO:0005634:nucleus;GO:0005694:chromosome;	GO:0018024:histone-lysine N-methyltransferase activity;GO:0042800:histone methyltransferase activity (H3-K4 specific);GO:0046872:metal ion binding;GO:0046976:histone methyltransferase activity (H3-K27 specific);	K11425
ENSMUSG00000064373	238.829	2.86819	0.137743	20.8227	2.7e-96	1.73e-94	15	3268547	3280508	+	Selenop	selenoprotein P [Source:MGI Symbol%3BAcc:MGI:894288]	GO:0001887:selenium compound metabolic process;GO:0007420:brain development;GO:0007626:locomotory behavior;GO:0009791:post-embryonic development;GO:0019953:sexual reproduction;GO:0040007:growth;	GO:0005576:extracellular region;GO:0005615:extracellular space;GO:0070062:extracellular exosome;	GO:0008430:selenium binding;	-
ENSMUSG00000097715	524.877	1.85142	0.0889302	20.8188	2.92e-96	1.87e-94	13	12615057	12650388	-	Gpr137b-ps	G protein-coupled receptor 137B%2C pseudogene [Source:MGI Symbol%3BAcc:MGI:3710533]	-	-	-	-
ENSMUSG00000021607	427.165	2.18246	0.104895	20.8061	3.81e-96	2.43e-94	13	73328513	73332178	+	Mrpl36	mitochondrial ribosomal protein L36 [Source:MGI Symbol%3BAcc:MGI:2137228]	GO:0006412:translation;	GO:0005739:mitochondrion;GO:0005762:mitochondrial large ribosomal subunit;GO:0016604:nuclear body;	GO:0003735:structural constituent of ribosome;	K02919
ENSMUSG00000058799	12970.5	0.826419	0.0398387	20.7441	1.39e-95	8.8e-94	10	111473223	111498150	+	Nap1l1	nucleosome assembly protein 1-like 1 [Source:MGI Symbol%3BAcc:MGI:1855693]	GO:0006334:nucleosome assembly;	GO:0005634:nucleus;GO:0016020:membrane;GO:0042470:melanosome;	GO:0003723:RNA binding;GO:0005515:protein binding;	K11279
ENSMUSG00000032332	771.477	-1.67683	0.0811995	-20.6508	9.61e-95	6.08e-93	9	79598991	79718831	-	Col12a1	collagen%2C type XII%2C alpha 1 [Source:MGI Symbol%3BAcc:MGI:88448]	GO:0007155:cell adhesion;GO:0035987:endodermal cell differentiation;	GO:0005578:proteinaceous extracellular matrix;GO:0005581:collagen trimer;GO:0005615:extracellular space;GO:0031012:extracellular matrix;GO:0070062:extracellular exosome;GO:1903561:extracellular vesicle;	-	K08132
ENSMUSG00000015354	192.849	3.54552	0.171986	20.6152	2e-94	1.26e-92	9	95637601	95698096	+	Pcolce2	procollagen C-endopeptidase enhancer 2 [Source:MGI Symbol%3BAcc:MGI:1923727]	GO:0010952:positive regulation of peptidase activity;	GO:0070062:extracellular exosome;	GO:0005518:collagen binding;GO:0008201:heparin binding;GO:0016504:peptidase activator activity;	-
ENSMUSG00000020467	257.352	-6.34259	0.307792	-20.6068	2.39e-94	1.5e-92	11	28853204	28926743	+	Efemp1	epidermal growth factor-containing fibulin-like extracellular matrix protein 1 [Source:MGI Symbol%3BAcc:MGI:1339998]	GO:0006355:regulation of transcription, DNA-templated;GO:0007173:epidermal growth factor receptor signaling pathway;GO:0018108:peptidyl-tyrosine phosphorylation;GO:0032331:negative regulation of chondrocyte differentiation;GO:0043010:camera-type eye development;GO:0048048:embryonic eye morphogenesis;GO:0048050:post-embryonic eye morphogenesis;	GO:0005578:proteinaceous extracellular matrix;GO:0005615:extracellular space;GO:0031012:extracellular matrix;GO:0070062:extracellular exosome;	GO:0005006:epidermal growth factor-activated receptor activity;GO:0005154:epidermal growth factor receptor binding;GO:0005509:calcium ion binding;GO:0008083:growth factor activity;	-
ENSMUSG00000024593	175.782	4.4251	0.214751	20.6057	2.44e-94	1.53e-92	18	57133090	57297467	+	Megf10	multiple EGF-like-domains 10 [Source:MGI Symbol%3BAcc:MGI:2685177]	GO:0006898:receptor-mediated endocytosis;GO:0014719:skeletal muscle satellite cell activation;GO:0014816:skeletal muscle satellite cell differentiation;GO:0014841:skeletal muscle satellite cell proliferation;GO:0033002:muscle cell proliferation;GO:0034109:homotypic cell-cell adhesion;GO:0043652:engulfment of apoptotic cell;GO:0043654:recognition of apoptotic cell;GO:0048641:regulation of skeletal…	GO:0001891:phagocytic cup;GO:0005886:plasma membrane;GO:0016021:integral component of membrane;GO:0016323:basolateral plasma membrane;GO:0042995:cell projection;	GO:0001849:complement component C1q binding;GO:0005044:scavenger receptor activity;GO:0005112:Notch binding;	-
ENSMUSG00000052727	5217.66	0.784157	0.0380974	20.5829	3.9e-94	2.44e-92	13	99421464	99516602	-	Map1b	microtubule-associated protein 1B [Source:MGI Symbol%3BAcc:MGI:1306778]	GO:0001578:microtubule bundle formation;GO:0007017:microtubule-based process;GO:0007409:axonogenesis;GO:0009987:cellular process;GO:0016358:dendrite development;GO:0032387:negative regulation of intracellular transport;GO:0045773:positive regulation of axon extension;GO:0047497:mitochondrion transport along microtubule;GO:0048675:axon extension;GO:0061162:establishment of monopolar cell polarity;	GO:0001750:photoreceptor outer segment;GO:0005829:cytosol;GO:0005874:microtubule;GO:0005875:microtubule associated complex;GO:0005886:plasma membrane;GO:0014069:postsynaptic density;GO:0030054:cell junction;GO:0043197:dendritic spine;	GO:0005515:protein binding;GO:0005519:cytoskeletal regulatory protein binding;GO:0008017:microtubule binding;	K10429
ENSMUSG00000079259	211.119	3.1893	0.154958	20.5817	4e-94	2.49e-92	9	114507133	114564369	-	Trim71	tripartite motif-containing 71 [Source:MGI Symbol%3BAcc:MGI:2685973]	GO:0000082:G1/S transition of mitotic cell cycle;GO:0001843:neural tube closure;GO:0008543:fibroblast growth factor receptor signaling pathway;GO:0010586:miRNA metabolic process;GO:0017148:negative regulation of translation;GO:0021915:neural tube development;GO:0035278:negative regulation of translation involved in gene silencing by miRNA;GO:0051246:regulation of protein metabolic process;GO:0051…	GO:0000932:cytoplasmic mRNA processing body;	GO:0004842:ubiquitin-protein transferase activity;GO:0005515:protein binding;GO:0008270:zinc ion binding;GO:0030371:translation repressor activity;GO:0035198:miRNA binding;GO:0061630:ubiquitin protein ligase activity;	K12035
ENSMUSG00000024376	203.703	-4.48938	0.218206	-20.5741	4.68e-94	2.91e-92	18	33796327	34007206	-	Epb41l4a	erythrocyte membrane protein band 4.1 like 4a [Source:MGI Symbol%3BAcc:MGI:103007]	GO:0031032:actomyosin structure organization;	GO:0005737:cytoplasm;GO:0005856:cytoskeleton;	GO:0005200:structural constituent of cytoskeleton;GO:0008092:cytoskeletal protein binding;	-
ENSMUSG00000035493	178.882	3.87191	0.188218	20.5714	4.95e-94	3.06e-92	13	56609603	56639339	+	Tgfbi	transforming growth factor%2C beta induced [Source:MGI Symbol%3BAcc:MGI:99959]	GO:0001525:angiogenesis;GO:0002062:chondrocyte differentiation;GO:0007155:cell adhesion;GO:0008283:cell proliferation;GO:0030198:extracellular matrix organization;	GO:0005578:proteinaceous extracellular matrix;GO:0005604:basement membrane;GO:0005615:extracellular space;GO:0005802:trans-Golgi network;GO:0031012:extracellular matrix;GO:0070062:extracellular exosome;	GO:0005178:integrin binding;GO:0005518:collagen binding;GO:0050840:extracellular matrix binding;	K19519
ENSMUSG00000031715	6380.77	-0.74597	0.0363336	-20.5312	1.13e-93	6.99e-92	8	80698507	80739497	-	Smarca5	SWI/SNF related%2C matrix associated%2C actin dependent regulator of chromatin%2C subfamily a%2C member 5 [Source:MGI Symbol%3BAcc:MGI:1935129]	GO:0000183:chromatin silencing at rDNA;GO:0006302:double-strand break repair;GO:0006333:chromatin assembly or disassembly;GO:0006334:nucleosome assembly;GO:0006338:chromatin remodeling;GO:0006352:DNA-templated transcription, initiation;GO:0016569:covalent chromatin modification;GO:0016584:nucleosome positioning;GO:0043044:ATP-dependent chromatin remodeling;GO:0045893:positive regulation of transc…	GO:0000793:condensed chromosome;GO:0001650:fibrillar center;GO:0005634:nucleus;GO:0005654:nucleoplasm;GO:0005677:chromatin silencing complex;GO:0016589:NURF complex;GO:0031010:ISWI-type complex;GO:0031213:RSF complex;GO:0043596:nuclear replication fork;	GO:0003677:DNA binding;GO:0004386:helicase activity;GO:0005515:protein binding;GO:0005524:ATP binding;GO:0016887:ATPase activity;GO:0031491:nucleosome binding;GO:0042393:histone binding;	K11654
ENSMUSG00000037860	206.511	-3.72725	0.181943	-20.4858	2.88e-93	1.77e-91	1	173350879	173466040	+	Aim2	absent in melanoma 2 [Source:MGI Symbol%3BAcc:MGI:2686159]	GO:0002218:activation of innate immune response;GO:0002230:positive regulation of defense response to virus by host;GO:0006915:apoptotic process;GO:0006954:inflammatory response;GO:0032088:negative regulation of NF-kappaB transcription factor activity;GO:0032461:positive regulation of protein oligomerization;GO:0032731:positive regulation of interleukin-1 beta production;GO:0033209:tumor necrosis…	GO:0005654:nucleoplasm;GO:0005737:cytoplasm;GO:0005739:mitochondrion;GO:0005829:cytosol;GO:0097169:AIM2 inflammasome complex;	GO:0003690:double-stranded DNA binding;GO:0005515:protein binding;GO:0042802:identical protein binding;	K12966
ENSMUSG00000004677	2319.91	-1.00216	0.048953	-20.4718	3.84e-93	2.35e-91	8	71272714	71360713	+	Myo9b	myosin IXb [Source:MGI Symbol%3BAcc:MGI:106624]	GO:0002548:monocyte chemotaxis;GO:0007266:Rho protein signal transduction;GO:0030010:establishment of cell polarity;GO:0030048:actin filament-based movement;GO:0033275:actin-myosin filament sliding;GO:0035023:regulation of Rho protein signal transduction;GO:0035385:Roundabout signaling pathway;GO:0043547:positive regulation of GTPase activity;GO:0048246:macrophage chemotaxis;GO:0072673:lamellipod…	GO:0001726:ruffle;GO:0005737:cytoplasm;GO:0005829:cytosol;GO:0005884:actin filament;GO:0005938:cell cortex;GO:0016020:membrane;GO:0016459:myosin complex;GO:0030027:lamellipodium;GO:0032433:filopodium tip;GO:0048471:perinuclear region of cytoplasm;	GO:0000146:microfilament motor activity;GO:0003774:motor activity;GO:0003779:actin binding;GO:0005096:GTPase activator activity;GO:0005516:calmodulin binding;GO:0005524:ATP binding;GO:0016887:ATPase activity;GO:0017048:Rho GTPase binding;GO:0030898:actin-dependent ATPase activity;GO:0043531:ADP binding;GO:0046872:metal ion binding;GO:0048495:Roundabout binding;GO:0051015:actin filament binding;	K10360
ENSMUSG00000027236	1234.32	-1.3618	0.0666444	-20.4339	8.36e-93	5.1e-91	2	122028546	122056598	+	Eif3j1	eukaryotic translation initiation factor 3%2C subunit J1 [Source:MGI Symbol%3BAcc:MGI:1925905]	GO:0006413:translational initiation;	GO:0005852:eukaryotic translation initiation factor 3 complex;	GO:0003743:translation initiation factor activity;	K03245
ENSMUSG00000042770	239.489	2.88277	0.141211	20.4147	1.24e-92	7.54e-91	6	135137522	135198022	-	Hebp1	heme binding protein 1 [Source:MGI Symbol%3BAcc:MGI:1333880]	GO:0042168:heme metabolic process;	GO:0005737:cytoplasm;GO:0005739:mitochondrion;GO:0005829:cytosol;GO:0070062:extracellular exosome;	GO:0020037:heme binding;	-
ENSMUSG00000074682	252.351	-6.39401	0.313493	-20.3961	1.81e-92	1.1e-90	2	152411955	152415027	-	Zcchc3	zinc finger%2C CCHC domain containing 3 [Source:MGI Symbol%3BAcc:MGI:1915167]	GO:0008150:biological_process;	GO:0005575:cellular_component;	GO:0003723:RNA binding;GO:0008270:zinc ion binding;	-
ENSMUSG00000036270	2177.21	-1.16307	0.0571551	-20.3493	4.71e-92	2.85e-90	8	105880881	105894908	+	Edc4	enhancer of mRNA decapping 4 [Source:MGI Symbol%3BAcc:MGI:2446249]	GO:0031087:deadenylation-independent decapping of nuclear-transcribed mRNA;	GO:0000932:cytoplasmic mRNA processing body;GO:0005634:nucleus;GO:0005654:nucleoplasm;GO:0016020:membrane;	GO:0005515:protein binding;	K12616
ENSMUSG00000031529	2414.08	-1.2416	0.0611687	-20.2979	1.34e-91	8.08e-90	8	34826460	34965690	-	Tnks	tankyrase%2C TRF1-interacting ankyrin-related ADP-ribose polymerase [Source:MGI Symbol%3BAcc:MGI:1341087]	GO:0000209:protein polyubiquitination;GO:0006471:protein ADP-ribosylation;GO:0015031:protein transport;GO:0016055:Wnt signaling pathway;GO:0018105:peptidyl-serine phosphorylation;GO:0018107:peptidyl-threonine phosphorylation;GO:0032212:positive regulation of telomere maintenance via telomerase;GO:0045944:positive regulation of transcription from RNA polymerase II promoter;GO:0051028:mRNA transpor…	GO:0000139:Golgi membrane;GO:0000775:chromosome, centromeric region;GO:0000781:chromosome, telomeric region;GO:0000784:nuclear chromosome, telomeric region;GO:0005643:nuclear pore;GO:0005654:nucleoplasm;GO:0005794:Golgi apparatus;GO:0005829:cytosol;GO:0016604:nuclear body;GO:0031965:nuclear membrane;GO:0097431:mitotic spindle pole;	GO:0003950:NAD+ ADP-ribosyltransferase activity;GO:0008270:zinc ion binding;GO:0042393:histone binding;	K10799;K06867
ENSMUSG00000038416	2892.15	-0.960557	0.047385	-20.2714	2.3e-91	1.38e-89	8	13757676	13781938	+	Cdc16	CDC16 cell division cycle 16 [Source:MGI Symbol%3BAcc:MGI:1917207]	GO:0007049:cell cycle;GO:0051301:cell division;GO:0070979:protein K11-linked ubiquitination;	GO:0005634:nucleus;GO:0005680:anaphase-promoting complex;GO:0005737:cytoplasm;GO:0005813:centrosome;GO:0005876:spindle microtubule;	GO:0005515:protein binding;	K03353
ENSMUSG00000043943	164.347	4.49165	0.221693	20.2606	2.86e-91	1.72e-89	9	18321951	18402995	-	Naalad2	N-acetylated alpha-linked acidic dipeptidase 2 [Source:MGI Symbol%3BAcc:MGI:1919810]	GO:0006508:proteolysis;GO:0042135:neurotransmitter catabolic process;	GO:0005886:plasma membrane;GO:0016021:integral component of membrane;	GO:0004180:carboxypeptidase activity;GO:0008233:peptidase activity;GO:0008237:metallopeptidase activity;GO:0016805:dipeptidase activity;GO:0046872:metal ion binding;GO:0050129:N-formylglutamate deformylase activity;	K01301
ENSMUSG00000056888	205.671	-3.71466	0.18342	-20.2522	3.4e-91	2.03e-89	10	111985448	112002631	-	Glipr1	GLI pathogenesis-related 1 (glioma) [Source:MGI Symbol%3BAcc:MGI:1920940]	-	GO:0005576:extracellular region;GO:0016020:membrane;GO:0016021:integral component of membrane;	-	-
ENSMUSG00000021591	616.174	-1.86859	0.0922865	-20.2477	3.72e-91	2.22e-89	13	75839868	75850154	+	Glrx	glutaredoxin [Source:MGI Symbol%3BAcc:MGI:2135625]	GO:0045454:cell redox homeostasis;GO:0045838:positive regulation of membrane potential;GO:0055114:oxidation-reduction process;GO:2000651:positive regulation of sodium ion transmembrane transporter activity;	GO:0005634:nucleus;GO:0005737:cytoplasm;GO:0005739:mitochondrion;GO:0070062:extracellular exosome;	GO:0009055:electron carrier activity;GO:0015035:protein disulfide oxidoreductase activity;GO:0015038:glutathione disulfide oxidoreductase activity;GO:0019153:protein-disulfide reductase (glutathione) activity;GO:0047485:protein N-terminus binding;	K03676
ENSMUSG00000039367	1047.52	1.22796	0.060737	20.2176	6.85e-91	4.07e-89	14	20674321	20694850	+	Sec24c	Sec24 related gene family%2C member C (S. cerevisiae) [Source:MGI Symbol%3BAcc:MGI:1919746]	GO:0001701:in utero embryonic development;GO:0006886:intracellular protein transport;GO:0090110:cargo loading into COPII-coated vesicle;	GO:0000139:Golgi membrane;GO:0005575:cellular_component;GO:0005829:cytosol;GO:0030127:COPII vesicle coat;	GO:0000149:SNARE binding;GO:0003674:molecular_function;GO:0008270:zinc ion binding;	K14007
ENSMUSG00000026185	194.04	6.17363	0.305505	20.208	8.33e-91	4.93e-89	1	72857932	72874884	-	Igfbp5	insulin-like growth factor binding protein 5 [Source:MGI Symbol%3BAcc:MGI:96440]	GO:0001558:regulation of cell growth;GO:0001649:osteoblast differentiation;GO:0006006:glucose metabolic process;GO:0007565:female pregnancy;GO:0007568:aging;GO:0010906:regulation of glucose metabolic process;GO:0014912:negative regulation of smooth muscle cell migration;GO:0017148:negative regulation of translation;GO:0030336:negative regulation of cell migration;GO:0031069:hair follicle morphoge…	GO:0005622:intracellular;GO:0016942:insulin-like growth factor binding protein complex;GO:0042567:insulin-like growth factor ternary complex;	GO:0001968:fibronectin binding;GO:0031994:insulin-like growth factor I binding;GO:0031995:insulin-like growth factor II binding;	-
ENSMUSG00000026389	224.332	2.8777	0.142673	20.1699	1.8e-90	1.06e-88	1	120190757	120272705	-	Steap3	STEAP family member 3 [Source:MGI Symbol%3BAcc:MGI:1915678]	GO:0006826:iron ion transport;GO:0006915:apoptotic process;GO:0007049:cell cycle;GO:0009306:protein secretion;GO:0015677:copper ion import;GO:0055072:iron ion homeostasis;GO:0055114:oxidation-reduction process;GO:0098706:ferric iron import across plasma membrane;GO:1902167:positive regulation of intrinsic apoptotic signaling pathway in response to DNA damage by p53 class mediator;GO:1990182:exoso…	GO:0005737:cytoplasm;GO:0005768:endosome;GO:0005771:multivesicular body;GO:0005886:plasma membrane;GO:0005887:integral component of plasma membrane;GO:0010008:endosome membrane;	GO:0000293:ferric-chelate reductase activity;GO:0005515:protein binding;GO:0008823:cupric reductase activity;GO:0046872:metal ion binding;GO:0052851:ferric-chelate reductase (NADPH) activity;	K10142;K06988
ENSMUSG00000013033	1394.52	-1.22164	0.060593	-20.1615	2.13e-90	1.25e-88	8	83900105	83941954	+	Adgrl1	adhesion G protein-coupled receptor L1 [Source:MGI Symbol%3BAcc:MGI:1929461]	GO:0007157:heterophilic cell-cell adhesion via plasma membrane cell adhesion molecules;GO:0007166:cell surface receptor signaling pathway;GO:0007186:G-protein coupled receptor signaling pathway;GO:0035584:calcium-mediated signaling using intracellular calcium source;GO:0051965:positive regulation of synapse assembly;GO:0090129:positive regulation of synapse maturation;	GO:0005622:intracellular;GO:0005886:plasma membrane;GO:0016021:integral component of membrane;GO:0030054:cell junction;GO:0030424:axon;GO:0030426:growth cone;GO:0042734:presynaptic membrane;GO:0043005:neuron projection;GO:0045202:synapse;	GO:0004930:G-protein coupled receptor activity;GO:0016524:latrotoxin receptor activity;GO:0030246:carbohydrate binding;GO:0050839:cell adhesion molecule binding;	K04592
ENSMUSG00000039108	1924.25	-1.07669	0.0534837	-20.1312	3.93e-90	2.31e-88	2	180024987	180035465	+	Lsm14b	LSM family member 14B [Source:MGI Symbol%3BAcc:MGI:3040677]	GO:0006417:regulation of translation;GO:0007275:multicellular organismal development;GO:0008150:biological_process;	GO:0005575:cellular_component;GO:0030529:ribonucleoprotein complex;	GO:0003723:RNA binding;	-
ENSMUSG00000027111	1089	1.36127	0.0676845	20.1119	5.8e-90	3.39e-88	2	71745616	71858416	+	Itga6	integrin alpha 6 [Source:MGI Symbol%3BAcc:MGI:96605]	GO:0007160:cell-matrix adhesion;GO:0007229:integrin-mediated signaling pathway;GO:0010668:ectodermal cell differentiation;GO:0010811:positive regulation of cell-substrate adhesion;GO:0016337:single organismal cell-cell adhesion;GO:0022409:positive regulation of cell-cell adhesion;GO:0030335:positive regulation of cell migration;GO:0031589:cell-substrate adhesion;GO:0031668:cellular response to ex…	GO:0005604:basement membrane;GO:0005886:plasma membrane;GO:0005913:cell-cell adherens junction;GO:0005925:focal adhesion;GO:0008305:integrin complex;GO:0009897:external side of plasma membrane;GO:0009925:basal plasma membrane;GO:0009986:cell surface;GO:0016323:basolateral plasma membrane;GO:0030056:hemidesmosome;GO:0030175:filopodium;GO:0034676:integrin alpha6-beta4 complex;GO:0045178:basal part …	GO:0005178:integrin binding;GO:0005515:protein binding;GO:0031994:insulin-like growth factor I binding;GO:0038132:neuregulin binding;GO:0043236:laminin binding;GO:0045296:cadherin binding;GO:0046872:metal ion binding;	K06485
ENSMUSG00000029403	192.671	-4.5717	0.227408	-20.1035	6.88e-90	4.01e-88	5	92006074	92043883	-	Cdkl2	cyclin-dependent kinase-like 2 (CDC2-related kinase) [Source:MGI Symbol%3BAcc:MGI:1858227]	GO:0006468:protein phosphorylation;GO:0051726:regulation of cell cycle;GO:1903955:positive regulation of protein targeting to mitochondrion;	GO:0005634:nucleus;GO:0005737:cytoplasm;GO:0005813:centrosome;	GO:0004693:cyclin-dependent protein serine/threonine kinase activity;GO:0005524:ATP binding;	K08824
ENSMUSG00000074971	165.909	4.38742	0.218389	20.0899	9.04e-90	5.25e-88	2	110360917	110363183	-	Fibin	fin bud initiation factor homolog (zebrafish) [Source:MGI Symbol%3BAcc:MGI:1914856]	GO:0008150:biological_process;	GO:0005576:extracellular region;GO:0005783:endoplasmic reticulum;GO:0005794:Golgi apparatus;	GO:0003674:molecular_function;	-
ENSMUSG00000025355	600.348	1.59898	0.079946	20.0008	5.43e-89	3.14e-87	10	128790910	128800824	+	Mmp19	matrix metallopeptidase 19 [Source:MGI Symbol%3BAcc:MGI:1927899]	GO:0001525:angiogenesis;GO:0001541:ovarian follicle development;GO:0001542:ovulation from ovarian follicle;GO:0001554:luteolysis;GO:0006508:proteolysis;GO:0009725:response to hormone;GO:0022617:extracellular matrix disassembly;GO:0030154:cell differentiation;GO:0030574:collagen catabolic process;GO:0051591:response to cAMP;	GO:0005576:extracellular region;GO:0005578:proteinaceous extracellular matrix;GO:0005615:extracellular space;GO:0005886:plasma membrane;GO:0031225:anchored component of membrane;	GO:0004222:metalloendopeptidase activity;GO:0004252:serine-type endopeptidase activity;GO:0008270:zinc ion binding;	K07998
ENSMUSG00000025810	1413.68	1.38781	0.0694297	19.9887	6.91e-89	3.99e-87	8	128358604	128503363	+	Nrp1	neuropilin 1 [Source:MGI Symbol%3BAcc:MGI:106206]	GO:0001525:angiogenesis;GO:0001569:patterning of blood vessels;GO:0001764:neuron migration;GO:0002040:sprouting angiogenesis;GO:0002042:cell migration involved in sprouting angiogenesis;GO:0007411:axon guidance;GO:0007413:axonal fasciculation;GO:0007507:heart development;GO:0008045:motor neuron axon guidance;GO:0009611:response to wounding;GO:0016358:dendrite development;GO:0016477:cell migration…	GO:0005615:extracellular space;GO:0005769:early endosome;GO:0005829:cytosol;GO:0005883:neurofilament;GO:0005886:plasma membrane;GO:0005925:focal adhesion;GO:0009986:cell surface;GO:0016021:integral component of membrane;GO:0030424:axon;GO:0030426:growth cone;GO:0043025:neuronal cell body;GO:0097443:sorting endosome;	GO:0005021:vascular endothelial growth factor-activated receptor activity;GO:0005515:protein binding;GO:0008201:heparin binding;GO:0017154:semaphorin receptor activity;GO:0019838:growth factor binding;GO:0038085:vascular endothelial growth factor binding;GO:0046872:metal ion binding;	K06724;K13045
ENSMUSG00000024501	5543.99	0.907555	0.0454821	19.9541	1.38e-88	7.95e-87	18	43320979	43438286	-	Dpysl3	dihydropyrimidinase-like 3 [Source:MGI Symbol%3BAcc:MGI:1349762]	GO:0007399:nervous system development;GO:0010976:positive regulation of neuron projection development;GO:0010977:negative regulation of neuron projection development;GO:0030336:negative regulation of cell migration;GO:0048678:response to axon injury;GO:0051017:actin filament bundle assembly;GO:0051260:protein homooligomerization;GO:0051491:positive regulation of filopodium assembly;GO:0051764:act…	GO:0005615:extracellular space;GO:0005829:cytosol;GO:0030027:lamellipodium;GO:0030426:growth cone;GO:0031941:filamentous actin;GO:0044297:cell body;GO:0070382:exocytic vesicle;	GO:0005515:protein binding;GO:0016810:hydrolase activity, acting on carbon-nitrogen (but not peptide) bonds;GO:0017124:SH3 domain binding;GO:0031005:filamin binding;GO:0035374:chondroitin sulfate binding;GO:0051219:phosphoprotein binding;	-
ENSMUSG00000029119	161.798	4.2466	0.213171	19.9211	2.67e-88	1.53e-86	5	36806921	36830653	-	Man2b2	mannosidase 2%2C alpha B2 [Source:MGI Symbol%3BAcc:MGI:1195262]	GO:0006013:mannose metabolic process;GO:0006517:protein deglycosylation;	GO:0005615:extracellular space;GO:0070062:extracellular exosome;	GO:0004559:alpha-mannosidase activity;GO:0030246:carbohydrate binding;GO:0046872:metal ion binding;	K12312
ENSMUSG00000028885	234.105	-6.38108	0.320532	-19.9078	3.48e-88	1.99e-86	4	132732966	132757252	-	Smpdl3b	sphingomyelin phosphodiesterase%2C acid-like 3B [Source:MGI Symbol%3BAcc:MGI:1916022]	GO:0006685:sphingomyelin catabolic process;GO:0006954:inflammatory response;GO:0034122:negative regulation of toll-like receptor signaling pathway;GO:0045087:innate immune response;GO:0045824:negative regulation of innate immune response;GO:0046466:membrane lipid catabolic process;GO:0050728:negative regulation of inflammatory response;	GO:0005615:extracellular space;GO:0005886:plasma membrane;GO:0031225:anchored component of membrane;GO:0070062:extracellular exosome;	GO:0004767:sphingomyelin phosphodiesterase activity;GO:0005515:protein binding;GO:0008081:phosphoric diester hydrolase activity;GO:0016798:hydrolase activity, acting on glycosyl bonds;GO:0046872:metal ion binding;	K01128
ENSMUSG00000029810	3449.21	-0.950109	0.0477315	-19.9053	3.66e-88	2.09e-86	6	48833818	48841496	-	Tmem176b	transmembrane protein 176B [Source:MGI Symbol%3BAcc:MGI:1916348]	GO:0030154:cell differentiation;GO:2001199:negative regulation of dendritic cell differentiation;	GO:0016021:integral component of membrane;GO:0031965:nuclear membrane;	GO:0005515:protein binding;	-
ENSMUSG00000020019	182.667	3.79983	0.190921	19.9027	3.86e-88	2.19e-86	10	93640681	93747207	+	Ntn4	netrin 4 [Source:MGI Symbol%3BAcc:MGI:1888978]	GO:0016322:neuron remodeling;GO:0030198:extracellular matrix organization;GO:0060668:regulation of branching involved in salivary gland morphogenesis by extracellular matrix-epithelial cell signaling;	GO:0005604:basement membrane;GO:0005886:plasma membrane;	GO:0043237:laminin-1 binding;	K06845
ENSMUSG00000026535	199.354	6.61285	0.332474	19.8898	4.99e-88	2.83e-86	1	173962568	173982744	-	Ifi202b	interferon activated gene 202B [Source:MGI Symbol%3BAcc:MGI:1347083]	-	-	-	K12971
ENSMUSG00000028760	812.682	-1.37479	0.0691308	-19.8867	5.3e-88	3e-86	4	137993022	138208508	+	Eif4g3	eukaryotic translation initiation factor 4 gamma%2C 3 [Source:MGI Symbol%3BAcc:MGI:1923935]	GO:0001934:positive regulation of protein phosphorylation;GO:0006413:translational initiation;GO:0007283:spermatogenesis;GO:0045727:positive regulation of translation;GO:0060903:positive regulation of meiosis I;	GO:0005575:cellular_component;	GO:0003723:RNA binding;GO:0003743:translation initiation factor activity;GO:0005515:protein binding;	K03260
ENSMUSG00000065954	662.262	-1.67868	0.0845677	-19.8502	1.1e-87	6.19e-86	8	25154552	25256588	-	Tacc1	transforming%2C acidic coiled-coil containing protein 1 [Source:MGI Symbol%3BAcc:MGI:2443510]	GO:0000226:microtubule cytoskeleton organization;GO:0007049:cell cycle;GO:0008283:cell proliferation;GO:0021987:cerebral cortex development;GO:0022008:neurogenesis;GO:0022027:interkinetic nuclear migration;GO:0032886:regulation of microtubule-based process;GO:0051301:cell division;	GO:0005634:nucleus;GO:0005737:cytoplasm;GO:0005815:microtubule organizing center;GO:0015630:microtubule cytoskeleton;GO:0030496:midbody;	GO:0019904:protein domain specific binding;	K14281
ENSMUSG00000016256	1551.07	-1.11853	0.056397	-19.8332	1.54e-87	8.65e-86	2	174427493	174439039	-	Ctsz	cathepsin Z [Source:MGI Symbol%3BAcc:MGI:1891190]	GO:0006508:proteolysis;GO:0010757:negative regulation of plasminogen activation;GO:0010977:negative regulation of neuron projection development;GO:0032091:negative regulation of protein binding;GO:0043525:positive regulation of neuron apoptotic process;GO:0051603:proteolysis involved in cellular protein catabolic process;GO:0060441:epithelial tube branching involved in lung morphogenesis;GO:19012…	GO:0005615:extracellular space;GO:0005764:lysosome;GO:0005783:endoplasmic reticulum;GO:0009986:cell surface;GO:0030426:growth cone;GO:0031410:cytoplasmic vesicle;GO:0043231:intracellular membrane-bounded organelle;GO:0070062:extracellular exosome;	GO:0004180:carboxypeptidase activity;GO:0004197:cysteine-type endopeptidase activity;	K08568
ENSMUSG00000040174	472.772	1.75308	0.088447	19.8207	1.97e-87	1.11e-85	2	93980550	94010807	-	Alkbh3	alkB homolog 3%2C alpha-ketoglutarate-dependent dioxygenase [Source:MGI Symbol%3BAcc:MGI:1916363]	GO:0006281:DNA repair;GO:0006307:DNA dealkylation involved in DNA repair;GO:0008283:cell proliferation;GO:0035552:oxidative single-stranded DNA demethylation;GO:0035553:oxidative single-stranded RNA demethylation;	GO:0005634:nucleus;GO:0005654:nucleoplasm;GO:0005739:mitochondrion;GO:0005829:cytosol;	GO:0004519:endonuclease activity;GO:0004527:exonuclease activity;GO:0008198:ferrous iron binding;GO:0016706:oxidoreductase activity, acting on paired donors, with incorporation or reduction of molecular oxygen, 2-oxoglutarate as one donor, and incorporation of one atom each of oxygen into both donors;GO:0043734:DNA-N1-methyladenine dioxygenase activity;GO:0051747:cytosine C-5 DNA demethylase acti…	K10860
ENSMUSG00000027580	474.179	-1.83662	0.0926873	-19.8152	2.2e-87	1.23e-85	2	181227615	181242027	-	Helz2	helicase with zinc finger 2%2C transcriptional coactivator [Source:MGI Symbol%3BAcc:MGI:2385169]	GO:0006351:transcription, DNA-templated;GO:0045944:positive regulation of transcription from RNA polymerase II promoter;	GO:0005654:nucleoplasm;GO:0016020:membrane;	GO:0003677:DNA binding;GO:0003723:RNA binding;GO:0004386:helicase activity;GO:0005524:ATP binding;GO:0030374:ligand-dependent nuclear receptor transcription coactivator activity;GO:0046872:metal ion binding;	-
ENSMUSG00000002897	414.309	-1.98584	0.100406	-19.7781	4.6e-87	2.56e-85	6	120463247	120487559	+	Il17ra	interleukin 17 receptor A [Source:MGI Symbol%3BAcc:MGI:107399]	GO:0019221:cytokine-mediated signaling pathway;GO:0032747:positive regulation of interleukin-23 production;GO:0050729:positive regulation of inflammatory response;GO:0050832:defense response to fungus;GO:0071621:granulocyte chemotaxis;GO:0072537:fibroblast activation;GO:1900017:positive regulation of cytokine production involved in inflammatory response;GO:2000664:positive regulation of interleuk…	GO:0005886:plasma membrane;GO:0005887:integral component of plasma membrane;	GO:0005102:receptor binding;GO:0030368:interleukin-17 receptor activity;	K05164
ENSMUSG00000030096	2635.28	-1.00812	0.0510116	-19.7625	6.26e-87	3.48e-85	6	91684053	91759066	+	Slc6a6	solute carrier family 6 (neurotransmitter transporter%2C taurine)%2C member 6 [Source:MGI Symbol%3BAcc:MGI:98488]	GO:0006836:neurotransmitter transport;GO:0015734:taurine transport;GO:0098656:anion transmembrane transport;GO:1903825:organic acid transmembrane transport;	GO:0005887:integral component of plasma membrane;	GO:0005328:neurotransmitter:sodium symporter activity;GO:0005368:taurine transmembrane transporter activity;GO:0005369:taurine:sodium symporter activity;	K05039
ENSMUSG00000020592	2322.17	-0.952685	0.0482482	-19.7455	8.77e-87	4.86e-85	12	8771323	8793715	+	Sdc1	syndecan 1 [Source:MGI Symbol%3BAcc:MGI:1349162]	GO:0001657:ureteric bud development;GO:0006024:glycosaminoglycan biosynthetic process;GO:0006954:inflammatory response;GO:0009636:response to toxic substance;GO:0016477:cell migration;GO:0042060:wound healing;GO:0042476:odontogenesis;GO:0042542:response to hydrogen peroxide;GO:0048627:myoblast development;GO:0051384:response to glucocorticoid;GO:0051591:response to cAMP;GO:0051592:response to cal…	GO:0005576:extracellular region;GO:0005796:Golgi lumen;GO:0009897:external side of plasma membrane;GO:0009986:cell surface;GO:0016021:integral component of membrane;GO:0043234:protein complex;GO:0070062:extracellular exosome;	GO:0001948:glycoprotein binding;GO:0005515:protein binding;GO:0008022:protein C-terminus binding;	K06257
ENSMUSG00000027208	3268.86	-0.892441	0.0452072	-19.7411	9.56e-87	5.28e-85	2	126034658	126091185	+	Fgf7	fibroblast growth factor 7 [Source:MGI Symbol%3BAcc:MGI:95521]	GO:0008284:positive regulation of cell proliferation;GO:0008543:fibroblast growth factor receptor signaling pathway;GO:0010463:mesenchymal cell proliferation;GO:0010838:positive regulation of keratinocyte proliferation;GO:0031069:hair follicle morphogenesis;GO:0031532:actin cytoskeleton reorganization;GO:0034394:protein localization to cell surface;GO:0045893:positive regulation of transcription,…	GO:0005576:extracellular region;GO:0005794:Golgi apparatus;	GO:0005104:fibroblast growth factor receptor binding;GO:0005515:protein binding;GO:0008083:growth factor activity;GO:0008201:heparin binding;GO:0042056:chemoattractant activity;	K04358
ENSMUSG00000010660	444.52	-1.88185	0.0953311	-19.7401	9.75e-87	5.37e-85	9	119071527	119093502	-	Plcd1	phospholipase C%2C delta 1 [Source:MGI Symbol%3BAcc:MGI:97614]	GO:0001525:angiogenesis;GO:0016042:lipid catabolic process;GO:0035556:intracellular signal transduction;GO:0042127:regulation of cell proliferation;GO:0060716:labyrinthine layer blood vessel development;	GO:0005737:cytoplasm;GO:0005829:cytosol;GO:0070062:extracellular exosome;	GO:0001786:phosphatidylserine binding;GO:0004435:phosphatidylinositol phospholipase C activity;GO:0004629:phospholipase C activity;GO:0004871:signal transducer activity;GO:0005509:calcium ion binding;GO:0005515:protein binding;GO:0005546:phosphatidylinositol-4,5-bisphosphate binding;GO:0032794:GTPase activating protein binding;GO:0070300:phosphatidic acid binding;GO:1901981:phosphatidylinositol p…	K05857
ENSMUSG00000000266	183.146	3.46986	0.17578	19.7398	9.82e-87	5.4e-85	X	140664599	140767715	+	Mid2	midline 2 [Source:MGI Symbol%3BAcc:MGI:1344333]	GO:0010508:positive regulation of autophagy;GO:0016567:protein ubiquitination;GO:0032897:negative regulation of viral transcription;GO:0035372:protein localization to microtubule;GO:0043123:positive regulation of I-kappaB kinase/NF-kappaB signaling;GO:0045087:innate immune response;GO:0046597:negative regulation of viral entry into host cell;GO:0051091:positive regulation of sequence-specific DNA…	GO:0005737:cytoplasm;GO:0005874:microtubule;GO:0070062:extracellular exosome;	GO:0008017:microtubule binding;GO:0008270:zinc ion binding;GO:0016740:transferase activity;GO:0042802:identical protein binding;GO:0042803:protein homodimerization activity;GO:0046982:protein heterodimerization activity;GO:0051219:phosphoprotein binding;	K10647
ENSMUSG00000033596	1997.34	-1.01816	0.0516018	-19.7311	1.17e-86	6.39e-85	8	111270944	111300222	-	Rfwd3	ring finger and WD repeat domain 3 [Source:MGI Symbol%3BAcc:MGI:2384584]	GO:0000724:double-strand break repair via homologous recombination;GO:0006974:cellular response to DNA damage stimulus;GO:0010212:response to ionizing radiation;GO:0016567:protein ubiquitination;GO:0031297:replication fork processing;GO:0031571:mitotic G1 DNA damage checkpoint;GO:0036297:interstrand cross-link repair;GO:2000001:regulation of DNA damage checkpoint;	GO:0005634:nucleus;GO:0005654:nucleoplasm;GO:0005737:cytoplasm;GO:0016605:PML body;GO:0035861:site of double-strand break;	GO:0002039:p53 binding;GO:0004842:ubiquitin-protein transferase activity;GO:0046872:metal ion binding;GO:0097371:MDM2/MDM4 family protein binding;	K15691
ENSMUSG00000023886	192.761	6.56976	0.333286	19.7121	1.7e-86	9.28e-85	17	14279506	14404790	+	Smoc2	SPARC related modular calcium binding 2 [Source:MGI Symbol%3BAcc:MGI:1929881]	GO:0007165:signal transduction;GO:0010811:positive regulation of cell-substrate adhesion;GO:0030198:extracellular matrix organization;	GO:0005578:proteinaceous extracellular matrix;GO:0005604:basement membrane;GO:0005614:interstitial matrix;	GO:0005509:calcium ion binding;GO:0005539:glycosaminoglycan binding;GO:0008201:heparin binding;	-
ENSMUSG00000057530	442.16	-1.92535	0.0977746	-19.6917	2.54e-86	1.38e-84	4	137862237	137965229	+	Ece1	endothelin converting enzyme 1 [Source:MGI Symbol%3BAcc:MGI:1101357]	GO:0001921:positive regulation of receptor recycling;GO:0007507:heart development;GO:0010814:substance P catabolic process;GO:0010815:bradykinin catabolic process;GO:0010816:calcitonin catabolic process;GO:0016485:protein processing;GO:0016486:peptide hormone processing;GO:0034959:endothelin maturation;GO:0042447:hormone catabolic process;GO:0042733:embryonic digit morphogenesis;GO:0043583:ear de…	GO:0005765:lysosomal membrane;GO:0005768:endosome;GO:0005769:early endosome;GO:0005794:Golgi apparatus;GO:0005886:plasma membrane;GO:0009897:external side of plasma membrane;GO:0009986:cell surface;GO:0016020:membrane;GO:0016021:integral component of membrane;GO:0033093:Weibel-Palade body;GO:0048471:perinuclear region of cytoplasm;GO:0070062:extracellular exosome;	GO:0004175:endopeptidase activity;GO:0004222:metalloendopeptidase activity;GO:0008270:zinc ion binding;GO:0042803:protein homodimerization activity;	K01415
ENSMUSG00000071369	200.323	-3.35071	0.170179	-19.6894	2.66e-86	1.44e-84	10	19934472	20142753	+	Map3k5	mitogen-activated protein kinase kinase kinase 5 [Source:MGI Symbol%3BAcc:MGI:1346876]	GO:0000165:MAPK cascade;GO:0000186:activation of MAPKK activity;GO:0000187:activation of MAPK activity;GO:0002931:response to ischemia;GO:0006468:protein phosphorylation;GO:0007254:JNK cascade;GO:0008631:intrinsic apoptotic signaling pathway in response to oxidative stress;GO:0010666:positive regulation of cardiac muscle cell apoptotic process;GO:0010941:regulation of cell death;GO:0034198:cellul…	GO:0005829:cytosol;GO:0009897:external side of plasma membrane;GO:0043234:protein complex;GO:1902911:protein kinase complex;GO:1990604:IRE1-TRAF2-ASK1 complex;	GO:0000287:magnesium ion binding;GO:0004672:protein kinase activity;GO:0004709:MAP kinase kinase kinase activity;GO:0005515:protein binding;GO:0005524:ATP binding;GO:0019901:protein kinase binding;GO:0019903:protein phosphatase binding;GO:0019904:protein domain specific binding;GO:0042803:protein homodimerization activity;	K04426
ENSMUSG00000019843	2108.06	0.968597	0.0492536	19.6655	4.26e-86	2.31e-84	10	39368855	39565381	+	Fyn	Fyn proto-oncogene [Source:MGI Symbol%3BAcc:MGI:95602]	GO:0001764:neuron migration;GO:0002250:adaptive immune response;GO:0006468:protein phosphorylation;GO:0007166:cell surface receptor signaling pathway;GO:0007169:transmembrane receptor protein tyrosine kinase signaling pathway;GO:0007411:axon guidance;GO:0008360:regulation of cell shape;GO:0010629:negative regulation of gene expression;GO:0010976:positive regulation of neuron projection developmen…	GO:0005634:nucleus;GO:0005739:mitochondrion;GO:0005768:endosome;GO:0005829:cytosol;GO:0005884:actin filament;GO:0005886:plasma membrane;GO:0014069:postsynaptic density;GO:0030425:dendrite;GO:0031234:extrinsic component of cytoplasmic side of plasma membrane;GO:0045121:membrane raft;GO:0071944:cell periphery;	GO:0001664:G-protein coupled receptor binding;GO:0001948:glycoprotein binding;GO:0004672:protein kinase activity;GO:0004713:protein tyrosine kinase activity;GO:0004715:non-membrane spanning protein tyrosine kinase activity;GO:0004871:signal transducer activity;GO:0005515:protein binding;GO:0005524:ATP binding;GO:0015631:tubulin binding;GO:0019899:enzyme binding;GO:0031802:type 5 metabotropic glut…	K05703;K08892
ENSMUSG00000062168	189.626	6.45285	0.328203	19.6611	4.64e-86	2.51e-84	X	160623094	160735765	-	Ppef1	protein phosphatase with EF hand calcium-binding domain 1 [Source:MGI Symbol%3BAcc:MGI:1097157]	GO:0006470:protein dephosphorylation;GO:0050906:detection of stimulus involved in sensory perception;	-	GO:0004722:protein serine/threonine phosphatase activity;GO:0005506:iron ion binding;GO:0005509:calcium ion binding;GO:0030145:manganese ion binding;	-
ENSMUSG00000038319	217.45	2.92176	0.148617	19.6596	4.78e-86	2.58e-84	5	24319589	24351604	-	Kcnh2	potassium voltage-gated channel%2C subfamily H (eag-related)%2C member 2 [Source:MGI Symbol%3BAcc:MGI:1341722]	GO:0000160:phosphorelay signal transduction system;GO:0023014:signal transduction by protein phosphorylation;GO:0035690:cellular response to drug;GO:0042391:regulation of membrane potential;GO:0055075:potassium ion homeostasis;GO:0060048:cardiac muscle contraction;GO:0060306:regulation of membrane repolarization;GO:0060307:regulation of ventricular cardiac muscle cell membrane repolarization;GO:0…	GO:0005635:nuclear envelope;GO:0005737:cytoplasm;GO:0005886:plasma membrane;GO:0005887:integral component of plasma membrane;GO:0008076:voltage-gated potassium channel complex;GO:0009986:cell surface;GO:0048471:perinuclear region of cytoplasm;	GO:0000155:phosphorelay sensor kinase activity;GO:0005242:inward rectifier potassium channel activity;GO:0005249:voltage-gated potassium channel activity;GO:0005251:delayed rectifier potassium channel activity;GO:0031625:ubiquitin protein ligase binding;GO:0042802:identical protein binding;GO:0042803:protein homodimerization activity;GO:0055131:C3HC4-type RING finger domain binding;GO:0097110:sca…	K04905
ENSMUSG00000049191	185.365	3.40793	0.173428	19.6505	5.73e-86	3.08e-84	X	102066544	102071304	-	Rgag4	retrotransposon gag domain containing 4 [Source:MGI Symbol%3BAcc:MGI:3045324]	-	-	-	-
ENSMUSG00000048911	743.915	-1.45838	0.0742403	-19.6441	6.5e-86	3.48e-84	2	131298064	131352892	-	Rnf24	ring finger protein 24 [Source:MGI Symbol%3BAcc:MGI:1261771]	GO:0000209:protein polyubiquitination;GO:0042787:protein ubiquitination involved in ubiquitin-dependent protein catabolic process;GO:0043161:proteasome-mediated ubiquitin-dependent protein catabolic process;	GO:0000139:Golgi membrane;GO:0005794:Golgi apparatus;GO:0016021:integral component of membrane;	GO:0008270:zinc ion binding;GO:0061630:ubiquitin protein ligase activity;	-
ENSMUSG00000047562	290.92	-2.53979	0.129534	-19.6071	1.35e-85	7.18e-84	9	7502352	7510240	+	Mmp10	matrix metallopeptidase 10 [Source:MGI Symbol%3BAcc:MGI:97007]	GO:0006508:proteolysis;GO:0030334:regulation of cell migration;GO:0030574:collagen catabolic process;	GO:0005578:proteinaceous extracellular matrix;	GO:0004222:metalloendopeptidase activity;GO:0008270:zinc ion binding;	K01396
ENSMUSG00000082082	970.47	-1.32782	0.0677331	-19.6037	1.44e-85	7.66e-84	4	145446740	145450888	+	Gm13230	predicted gene 13230 [Source:MGI Symbol%3BAcc:MGI:3651934]	-	-	-	-
ENSMUSG00000006276	1236.56	-1.14429	0.0585213	-19.5534	3.86e-85	2.05e-83	8	72340999	72421460	-	Eps15l1	epidermal growth factor receptor pathway substrate 15-like 1 [Source:MGI Symbol%3BAcc:MGI:104582]	GO:0006897:endocytosis;	GO:0005634:nucleus;GO:0016020:membrane;GO:0030132:clathrin coat of coated pit;	GO:0005509:calcium ion binding;GO:0005515:protein binding;GO:0045296:cadherin binding;	K12472
ENSMUSG00000047407	3073.13	0.868651	0.0444458	19.544	4.64e-85	2.46e-83	17	70844205	70853546	-	Tgif1	TGFB-induced factor homeobox 1 [Source:MGI Symbol%3BAcc:MGI:1194497]	GO:0000122:negative regulation of transcription from RNA polymerase II promoter;GO:0001843:neural tube closure;GO:0006351:transcription, DNA-templated;GO:0007368:determination of left/right symmetry;GO:0008285:negative regulation of cell proliferation;GO:0009953:dorsal/ventral pattern formation;GO:0010470:regulation of gastrulation;GO:0038092:nodal signaling pathway;GO:0045666:positive regulation…	GO:0005634:nucleus;GO:0005654:nucleoplasm;	GO:0000978:RNA polymerase II core promoter proximal region sequence-specific DNA binding;GO:0001078:RNA polymerase II core promoter proximal region sequence-specific DNA binding transcription factor activity involved in negative regulation of transcription;GO:0003682:chromatin binding;GO:0005515:protein binding;GO:0008432:JUN kinase binding;	K19383
ENSMUSG00000031731	2188.08	-1.16316	0.0596883	-19.4872	1.41e-84	7.44e-83	8	109778554	109864204	+	Ap1g1	adaptor protein complex AP-1%2C gamma 1 subunit [Source:MGI Symbol%3BAcc:MGI:101919]	GO:0006886:intracellular protein transport;GO:0016192:vesicle-mediated transport;GO:0035646:endosome to melanosome transport;GO:0043323:positive regulation of natural killer cell degranulation;GO:0045954:positive regulation of natural killer cell mediated cytotoxicity;GO:0090160:Golgi to lysosome transport;	GO:0005794:Golgi apparatus;GO:0005802:trans-Golgi network;GO:0005829:cytosol;GO:0016020:membrane;GO:0030131:clathrin adaptor complex;GO:0030136:clathrin-coated vesicle;GO:0030665:clathrin-coated vesicle membrane;GO:0043231:intracellular membrane-bounded organelle;GO:0048471:perinuclear region of cytoplasm;GO:0055037:recycling endosome;	GO:0005515:protein binding;GO:0008565:protein transporter activity;GO:0017137:Rab GTPase binding;GO:0019894:kinesin binding;GO:0030742:GTP-dependent protein binding;	K12391
ENSMUSG00000026655	1690.71	1.09589	0.0562724	19.4747	1.8e-84	9.48e-83	2	3613758	3782142	+	Fam107b	family with sequence similarity 107%2C member B [Source:MGI Symbol%3BAcc:MGI:1913790]	GO:0007605:sensory perception of sound;	GO:0005575:cellular_component;	GO:0003674:molecular_function;	-
ENSMUSG00000026414	471.6	1.8549	0.0952577	19.4724	1.88e-84	9.88e-83	1	135836354	135852260	+	Tnnt2	troponin T2%2C cardiac [Source:MGI Symbol%3BAcc:MGI:104597]	GO:0006936:muscle contraction;GO:0006937:regulation of muscle contraction;GO:0007507:heart development;GO:0008016:regulation of heart contraction;GO:0030049:muscle filament sliding;GO:0032780:negative regulation of ATPase activity;GO:0032781:positive regulation of ATPase activity;GO:0045214:sarcomere organization;GO:0051592:response to calcium ion;GO:0055009:atrial cardiac muscle tissue morphogen…	GO:0005737:cytoplasm;GO:0005861:troponin complex;GO:0005865:striated muscle thin filament;GO:0030016:myofibril;GO:0030017:sarcomere;GO:0097512:cardiac myofibril;GO:1990584:cardiac Troponin complex;	GO:0003779:actin binding;GO:0005200:structural constituent of cytoskeleton;GO:0005523:tropomyosin binding;GO:0016887:ATPase activity;GO:0030172:troponin C binding;GO:0031013:troponin I binding;	K12045
ENSMUSG00000025268	1456.32	1.04296	0.0536555	19.438	3.68e-84	1.93e-82	X	150806370	150814345	-	Maged2	melanoma antigen%2C family D%2C 2 [Source:MGI Symbol%3BAcc:MGI:1933391]	GO:0007565:female pregnancy;GO:0070294:renal sodium ion absorption;	GO:0005634:nucleus;GO:0005730:nucleolus;GO:0005829:cytosol;GO:0016020:membrane;	GO:0003674:molecular_function;	-
ENSMUSG00000024238	777.297	1.58724	0.0817176	19.4235	4.88e-84	2.55e-82	18	5591860	5775467	+	Zeb1	zinc finger E-box binding homeobox 1 [Source:MGI Symbol%3BAcc:MGI:1344313]	GO:0000122:negative regulation of transcription from RNA polymerase II promoter;GO:0006351:transcription, DNA-templated;GO:0007389:pattern specification process;GO:0007417:central nervous system development;GO:0008285:negative regulation of cell proliferation;GO:0010464:regulation of mesenchymal cell proliferation;GO:0017015:regulation of transforming growth factor beta receptor signaling pathway…	GO:0005634:nucleus;GO:0005654:nucleoplasm;GO:0005667:transcription factor complex;GO:0005829:cytosol;	GO:0001227:RNA polymerase II transcription regulatory region sequence-specific DNA binding transcription factor activity involved in negative regulation of transcription;GO:0003682:chromatin binding;GO:0003700:sequence-specific DNA binding transcription factor activity;GO:0005515:protein binding;GO:0008134:transcription factor binding;GO:0046872:metal ion binding;GO:0070888:E-box binding;	K09299
ENSMUSG00000025856	761.787	1.6387	0.0844259	19.41	6.36e-84	3.31e-82	5	138976014	138997370	-	Pdgfa	platelet derived growth factor%2C alpha [Source:MGI Symbol%3BAcc:MGI:97527]	GO:0001525:angiogenesis;GO:0001942:hair follicle development;GO:0002053:positive regulation of mesenchymal cell proliferation;GO:0007596:blood coagulation;GO:0008284:positive regulation of cell proliferation;GO:0009611:response to wounding;GO:0009887:organ morphogenesis;GO:0010512:negative regulation of phosphatidylinositol biosynthetic process;GO:0010544:negative regulation of platelet activatio…	GO:0005615:extracellular space;GO:0005902:microvillus;GO:0009986:cell surface;GO:0016020:membrane;	GO:0005161:platelet-derived growth factor receptor binding;GO:0005518:collagen binding;GO:0008083:growth factor activity;GO:0042803:protein homodimerization activity;GO:0046982:protein heterodimerization activity;GO:0048407:platelet-derived growth factor binding;	K04359
ENSMUSG00000031660	2294.21	-0.940143	0.0484499	-19.4044	7.08e-84	3.68e-82	8	88331039	88362194	-	Brd7	bromodomain containing 7 [Source:MGI Symbol%3BAcc:MGI:1349766]	GO:0006351:transcription, DNA-templated;GO:0006357:regulation of transcription from RNA polymerase II promoter;GO:0007049:cell cycle;GO:0008285:negative regulation of cell proliferation;GO:0016055:Wnt signaling pathway;GO:0035066:positive regulation of histone acetylation;GO:0045892:negative regulation of transcription, DNA-templated;GO:0045893:positive regulation of transcription, DNA-templated;…	GO:0005634:nucleus;GO:0005654:nucleoplasm;GO:0005829:cytosol;GO:0090544:BAF-type complex;	GO:0002039:p53 binding;GO:0003713:transcription coactivator activity;GO:0003714:transcription corepressor activity;GO:0005515:protein binding;GO:0008134:transcription factor binding;GO:0042393:histone binding;GO:0044212:transcription regulatory region DNA binding;GO:0070577:lysine-acetylated histone binding;	K11723
ENSMUSG00000001349	278.992	2.46284	0.126951	19.3998	7.74e-84	4.01e-82	9	22099216	22109630	+	Cnn1	calponin 1 [Source:MGI Symbol%3BAcc:MGI:104979]	GO:0031032:actomyosin structure organization;	GO:0005856:cytoskeleton;GO:0005925:focal adhesion;	GO:0003779:actin binding;GO:0005516:calmodulin binding;	K20526
ENSMUSG00000022587	3558.22	0.942053	0.0485688	19.3963	8.3e-84	4.29e-82	15	74955051	74959905	+	Ly6e	lymphocyte antigen 6 complex%2C locus E [Source:MGI Symbol%3BAcc:MGI:106651]	GO:0001701:in utero embryonic development;GO:0030325:adrenal gland development;GO:0035265:organ growth;GO:0042415:norepinephrine metabolic process;GO:0048242:epinephrine secretion;GO:0055010:ventricular cardiac muscle tissue morphogenesis;GO:2000272:negative regulation of receptor activity;	GO:0005886:plasma membrane;GO:0031225:anchored component of membrane;	GO:0030550:acetylcholine receptor inhibitor activity;GO:0033130:acetylcholine receptor binding;	K06846
ENSMUSG00000020601	610.198	-1.5802	0.0815315	-19.3815	1.11e-83	5.7e-82	12	15791727	15816922	-	Trib2	tribbles pseudokinase 2 [Source:MGI Symbol%3BAcc:MGI:2145021]	GO:0006468:protein phosphorylation;GO:0006469:negative regulation of protein kinase activity;GO:0032436:positive regulation of proteasomal ubiquitin-dependent protein catabolic process;GO:0043405:regulation of MAP kinase activity;GO:0043433:negative regulation of sequence-specific DNA binding transcription factor activity;GO:0045081:negative regulation of interleukin-10 biosynthetic process;GO:00…	GO:0005634:nucleus;GO:0005737:cytoplasm;GO:0005856:cytoskeleton;	GO:0000166:nucleotide binding;GO:0004672:protein kinase activity;GO:0004860:protein kinase inhibitor activity;GO:0008134:transcription factor binding;GO:0031434:mitogen-activated protein kinase kinase binding;GO:0031625:ubiquitin protein ligase binding;GO:0055106:ubiquitin-protein transferase regulator activity;	K08814
ENSMUSG00000031438	155.205	4.16684	0.216054	19.2861	7.03e-83	3.61e-81	X	139563316	139673145	+	Rnf128	ring finger protein 128 [Source:MGI Symbol%3BAcc:MGI:1914139]	GO:0016567:protein ubiquitination;GO:0031647:regulation of protein stability;GO:0042036:negative regulation of cytokine biosynthetic process;	GO:0005770:late endosome;GO:0005783:endoplasmic reticulum;GO:0005794:Golgi apparatus;GO:0005856:cytoskeleton;GO:0016021:integral component of membrane;GO:0048471:perinuclear region of cytoplasm;	GO:0046872:metal ion binding;GO:0061630:ubiquitin protein ligase activity;	K10629;K15692;K10664
ENSMUSG00000063531	147.941	4.24126	0.220093	19.2703	9.54e-83	4.89e-81	5	14025276	14256689	+	Sema3e	sema domain%2C immunoglobulin domain (Ig)%2C short basic domain%2C secreted%2C (semaphorin) 3E [Source:MGI Symbol%3BAcc:MGI:1340034]	GO:0001569:patterning of blood vessels;GO:0001953:negative regulation of cell-matrix adhesion;GO:0002040:sprouting angiogenesis;GO:0007399:nervous system development;GO:0008360:regulation of cell shape;GO:0016525:negative regulation of angiogenesis;GO:0030154:cell differentiation;GO:0050808:synapse organization;GO:0050919:negative chemotaxis;GO:0071526:semaphorin-plexin signaling pathway;GO:20002…	GO:0005576:extracellular region;GO:0005615:extracellular space;	GO:0005515:protein binding;GO:0030215:semaphorin receptor binding;GO:0038191:neuropilin binding;	K06840
ENSMUSG00000031749	2016.79	-0.996215	0.0517505	-19.2503	1.4e-82	7.17e-81	8	110919922	110972480	+	St3gal2	ST3 beta-galactoside alpha-2%2C3-sialyltransferase 2 [Source:MGI Symbol%3BAcc:MGI:99427]	GO:0006486:protein glycosylation;GO:0009311:oligosaccharide metabolic process;GO:0018279:protein N-linked glycosylation via asparagine;GO:0097503:sialylation;	GO:0000139:Golgi membrane;GO:0005576:extracellular region;GO:0016021:integral component of membrane;GO:0032580:Golgi cisterna membrane;	GO:0003836:beta-galactoside (CMP) alpha-2,3-sialyltransferase activity;	K03368
ENSMUSG00000006728	10753.2	0.802553	0.0416939	19.2487	1.45e-82	7.38e-81	10	127063534	127067920	+	Cdk4	cyclin-dependent kinase 4 [Source:MGI Symbol%3BAcc:MGI:88357]	GO:0000082:G1/S transition of mitotic cell cycle;GO:0002088:lens development in camera-type eye;GO:0006468:protein phosphorylation;GO:0007165:signal transduction;GO:0007623:circadian rhythm;GO:0008284:positive regulation of cell proliferation;GO:0009636:response to toxic substance;GO:0010288:response to lead ion;GO:0010389:regulation of G2/M transition of mitotic cell cycle;GO:0010468:regulation …	GO:0000307:cyclin-dependent protein kinase holoenzyme complex;GO:0000785:chromatin;GO:0005634:nucleus;GO:0005654:nucleoplasm;GO:0005667:transcription factor complex;GO:0005730:nucleolus;GO:0005737:cytoplasm;GO:0005829:cytosol;GO:0005923:bicellular tight junction;GO:0031965:nuclear membrane;GO:0043234:protein complex;GO:0048471:perinuclear region of cytoplasm;GO:0097129:cyclin D2-CDK4 complex;	GO:0004672:protein kinase activity;GO:0004674:protein serine/threonine kinase activity;GO:0004693:cyclin-dependent protein serine/threonine kinase activity;GO:0005515:protein binding;GO:0005524:ATP binding;GO:0016301:kinase activity;GO:0030332:cyclin binding;GO:0032403:protein complex binding;	K02091
ENSMUSG00000031776	1708.48	-1.02599	0.0533264	-19.2398	1.72e-82	8.73e-81	8	94666600	94674425	+	Arl2bp	ADP-ribosylation factor-like 2 binding protein [Source:MGI Symbol%3BAcc:MGI:1349429]	GO:0042531:positive regulation of tyrosine phosphorylation of STAT protein;GO:0050790:regulation of catalytic activity;GO:0051457:maintenance of protein location in nucleus;GO:1903506:regulation of nucleic acid-templated transcription;	GO:0005634:nucleus;GO:0005758:mitochondrial intermembrane space;GO:0005813:centrosome;GO:0005929:cilium;GO:0030496:midbody;	GO:0003713:transcription coactivator activity;GO:0005096:GTPase activator activity;GO:0005515:protein binding;GO:0030695:GTPase regulator activity;	K16742
ENSMUSG00000026131	3964.51	-1.09565	0.0569603	-19.2354	1.87e-82	9.5e-81	1	33908225	34308661	+	Dst	dystonin [Source:MGI Symbol%3BAcc:MGI:104627]	GO:0007155:cell adhesion;GO:0007409:axonogenesis;GO:0008090:retrograde axon cargo transport;GO:0045104:intermediate filament cytoskeleton organization;	GO:0005635:nuclear envelope;GO:0005737:cytoplasm;GO:0005789:endoplasmic reticulum membrane;GO:0005882:intermediate filament;GO:0005938:cell cortex;GO:0014069:postsynaptic density;GO:0015629:actin cytoskeleton;GO:0016021:integral component of membrane;GO:0030018:Z disc;GO:0030056:hemidesmosome;GO:0030424:axon;GO:0031410:cytoplasmic vesicle;GO:0031673:H zone;GO:0035371:microtubule plus-end;GO:00423…	GO:0003779:actin binding;GO:0005509:calcium ion binding;GO:0005515:protein binding;GO:0051010:microtubule plus-end binding;	K10382;K19827
ENSMUSG00000081534	3839.89	-0.965417	0.0502205	-19.2236	2.35e-82	1.19e-80	15	97784355	97792692	+	Slc48a1	solute carrier family 48 (heme transporter)%2C member 1 [Source:MGI Symbol%3BAcc:MGI:1914989]	GO:0015886:heme transport;	GO:0005765:lysosomal membrane;GO:0005886:plasma membrane;GO:0010008:endosome membrane;GO:0016021:integral component of membrane;	GO:0015232:heme transporter activity;GO:0020037:heme binding;	K15380
ENSMUSG00000045636	233.782	2.50086	0.130181	19.2107	3.01e-82	1.52e-80	8	40990914	41133726	-	Mtus1	mitochondrial tumor suppressor 1 [Source:MGI Symbol%3BAcc:MGI:2142572]	GO:0007049:cell cycle;GO:0010758:regulation of macrophage chemotaxis;	GO:0005615:extracellular space;GO:0005730:nucleolus;GO:0005737:cytoplasm;GO:0005739:mitochondrion;GO:0005794:Golgi apparatus;GO:0005886:plasma membrane;GO:0015630:microtubule cytoskeleton;	GO:0003674:molecular_function;	-
ENSMUSG00000030671	203.79	-3.24256	0.169055	-19.1805	5.38e-82	2.71e-80	7	114415281	114539251	+	Pde3b	phosphodiesterase 3B%2C cGMP-inhibited [Source:MGI Symbol%3BAcc:MGI:1333863]	GO:0001525:angiogenesis;GO:0007162:negative regulation of cell adhesion;GO:0007165:signal transduction;GO:0016525:negative regulation of angiogenesis;GO:0031018:endocrine pancreas development;GO:0032869:cellular response to insulin stimulus;GO:0042593:glucose homeostasis;GO:0050796:regulation of insulin secretion;GO:0050995:negative regulation of lipid catabolic process;	GO:0005783:endoplasmic reticulum;GO:0005794:Golgi apparatus;GO:0005829:cytosol;GO:0016020:membrane;GO:0016021:integral component of membrane;GO:0032045:guanyl-nucleotide exchange factor complex;	GO:0004114:3',5'-cyclic-nucleotide phosphodiesterase activity;GO:0043422:protein kinase B binding;GO:0046872:metal ion binding;	K13296
ENSMUSG00000071847	282.486	2.48614	0.129649	19.1759	5.88e-82	2.95e-80	18	62922327	62953195	+	Apcdd1	adenomatosis polyposis coli down-regulated 1 [Source:MGI Symbol%3BAcc:MGI:3513977]	GO:0001942:hair follicle development;GO:0016055:Wnt signaling pathway;GO:0030178:negative regulation of Wnt signaling pathway;GO:0043615:astrocyte cell migration;	GO:0005887:integral component of plasma membrane;	GO:0017147:Wnt-protein binding;	-
ENSMUSG00000052397	1013.47	-1.50099	0.0783606	-19.1549	8.82e-82	4.41e-80	17	6738041	6782784	-	Ezr	ezrin [Source:MGI Symbol%3BAcc:MGI:98931]	GO:0000122:negative regulation of transcription from RNA polymerase II promoter;GO:0001951:intestinal D-glucose absorption;GO:0003376:sphingosine-1-phosphate signaling pathway;GO:0007159:leukocyte cell-cell adhesion;GO:0008360:regulation of cell shape;GO:0010628:positive regulation of gene expression;GO:0010737:protein kinase A signaling;GO:0022614:membrane to membrane docking;GO:0030033:microvil…	GO:0001650:fibrillar center;GO:0001726:ruffle;GO:0001772:immunological synapse;GO:0001931:uropod;GO:0005615:extracellular space;GO:0005622:intracellular;GO:0005737:cytoplasm;GO:0005768:endosome;GO:0005829:cytosol;GO:0005884:actin filament;GO:0005886:plasma membrane;GO:0005902:microvillus;GO:0005903:brush border;GO:0005925:focal adhesion;GO:0005938:cell cortex;GO:0015629:actin cytoskeleton;GO:0016…	GO:0003723:RNA binding;GO:0003779:actin binding;GO:0005515:protein binding;GO:0008017:microtubule binding;GO:0008022:protein C-terminus binding;GO:0019904:protein domain specific binding;GO:0034236:protein kinase A catalytic subunit binding;GO:0034237:protein kinase A regulatory subunit binding;GO:0044548:S100 protein binding;GO:0045296:cadherin binding;GO:0050839:cell adhesion molecule binding;G…	K08007
ENSMUSG00000040152	14884.8	-0.964915	0.0504169	-19.1387	1.2e-81	6e-80	2	118111876	118127133	+	Thbs1	thrombospondin 1 [Source:MGI Symbol%3BAcc:MGI:98737]	GO:0000187:activation of MAPK activity;GO:0001937:negative regulation of endothelial cell proliferation;GO:0001953:negative regulation of cell-matrix adhesion;GO:0002040:sprouting angiogenesis;GO:0002581:negative regulation of antigen processing and presentation of peptide or polysaccharide antigen via MHC class II;GO:0002605:negative regulation of dendritic cell antigen processing and presentati…	GO:0005577:fibrinogen complex;GO:0005615:extracellular space;GO:0005783:endoplasmic reticulum;GO:0009897:external side of plasma membrane;GO:0009986:cell surface;GO:0016529:sarcoplasmic reticulum;GO:0030141:secretory granule;GO:0031012:extracellular matrix;GO:0031091:platelet alpha granule;GO:0070062:extracellular exosome;	GO:0001786:phosphatidylserine binding;GO:0001968:fibronectin binding;GO:0005178:integrin binding;GO:0005509:calcium ion binding;GO:0005515:protein binding;GO:0008201:heparin binding;GO:0017134:fibroblast growth factor binding;GO:0030169:low-density lipoprotein particle binding;GO:0043236:laminin binding;GO:0050840:extracellular matrix binding;GO:0070051:fibrinogen binding;GO:0070052:collagen V bi…	K16857
ENSMUSG00000022146	2238.85	-1.09496	0.0572599	-19.1227	1.63e-81	8.14e-80	15	6813577	6874969	-	Osmr	oncostatin M receptor [Source:MGI Symbol%3BAcc:MGI:1330819]	GO:0007166:cell surface receptor signaling pathway;GO:0008284:positive regulation of cell proliferation;GO:0034097:response to cytokine;GO:0038165:oncostatin-M-mediated signaling pathway;	GO:0005887:integral component of plasma membrane;GO:0005900:oncostatin-M receptor complex;GO:0009897:external side of plasma membrane;GO:0016324:apical plasma membrane;	GO:0004924:oncostatin-M receptor activity;GO:0019838:growth factor binding;GO:0019955:cytokine binding;	K05057
ENSMUSG00000003847	4638.62	-0.859719	0.0450354	-19.0899	3.07e-81	1.52e-79	8	107293470	107379517	+	Nfat5	nuclear factor of activated T cells 5 [Source:MGI Symbol%3BAcc:MGI:1859333]	GO:0001816:cytokine production;GO:0006351:transcription, DNA-templated;GO:0006366:transcription from RNA polymerase II promoter;GO:0006970:response to osmotic stress;GO:0010628:positive regulation of gene expression;GO:0045944:positive regulation of transcription from RNA polymerase II promoter;GO:0070884:regulation of calcineurin-NFAT signaling cascade;	GO:0005634:nucleus;GO:0005654:nucleoplasm;GO:0005737:cytoplasm;GO:0005829:cytosol;	GO:0000978:RNA polymerase II core promoter proximal region sequence-specific DNA binding;GO:0001077:RNA polymerase II core promoter proximal region sequence-specific DNA binding transcription factor activity involved in positive regulation of transcription;GO:0003677:DNA binding;GO:0003700:sequence-specific DNA binding transcription factor activity;	K17335
ENSMUSG00000028530	2842.7	-0.950995	0.0498702	-19.0694	4.53e-81	2.25e-79	4	101152367	101265282	-	Jak1	Janus kinase 1 [Source:MGI Symbol%3BAcc:MGI:96628]	GO:0007167:enzyme linked receptor protein signaling pathway;GO:0007169:transmembrane receptor protein tyrosine kinase signaling pathway;GO:0016477:cell migration;GO:0018108:peptidyl-tyrosine phosphorylation;GO:0019221:cytokine-mediated signaling pathway;GO:0030154:cell differentiation;GO:0035556:intracellular signal transduction;GO:0035722:interleukin-12-mediated signaling pathway;GO:0036016:cell…	GO:0005634:nucleus;GO:0005737:cytoplasm;GO:0005829:cytosol;GO:0005856:cytoskeleton;GO:0005925:focal adhesion;GO:0012505:endomembrane system;GO:0031234:extrinsic component of cytoplasmic side of plasma membrane;	GO:0004713:protein tyrosine kinase activity;GO:0004715:non-membrane spanning protein tyrosine kinase activity;GO:0005131:growth hormone receptor binding;GO:0005515:protein binding;GO:0005524:ATP binding;GO:0019903:protein phosphatase binding;GO:0031625:ubiquitin protein ligase binding;GO:0046872:metal ion binding;	K11217
ENSMUSG00000044906	1630.41	1.01245	0.0531161	19.0611	5.32e-81	2.63e-79	18	70452212	70472509	-	4930503L19Rik	RIKEN cDNA 4930503L19 gene [Source:MGI Symbol%3BAcc:MGI:1922045]	-	-	-	-
ENSMUSG00000039601	142.42	4.40995	0.231634	19.0384	8.19e-81	4.04e-79	17	43801851	44039516	+	Rcan2	regulator of calcineurin 2 [Source:MGI Symbol%3BAcc:MGI:1858219]	GO:0006979:response to oxidative stress;GO:0007219:Notch signaling pathway;GO:0007614:short-term memory;GO:0031987:locomotion involved in locomotory behavior;GO:0033173:calcineurin-NFAT signaling cascade;GO:0050790:regulation of catalytic activity;GO:0070884:regulation of calcineurin-NFAT signaling cascade;	GO:0005737:cytoplasm;	GO:0003676:nucleic acid binding;GO:0008597:calcium-dependent protein serine/threonine phosphatase regulator activity;	K17903
ENSMUSG00000102869	5048.62	-0.778862	0.0409351	-19.0267	1.02e-80	5.04e-79	2	156388065	156392979	-	2900097C17Rik	RIKEN cDNA 2900097C17 gene [Source:MGI Symbol%3BAcc:MGI:1914767]	-	-	-	-
ENSMUSG00000039062	252.243	-2.57881	0.135939	-18.9704	3e-80	1.47e-78	7	79821803	79861059	-	Anpep	alanyl (membrane) aminopeptidase [Source:MGI Symbol%3BAcc:MGI:5000466]	GO:0001525:angiogenesis;GO:0006508:proteolysis;GO:0007165:signal transduction;GO:0007267:cell-cell signaling;GO:0008217:regulation of blood pressure;GO:0030154:cell differentiation;GO:0043171:peptide catabolic process;	GO:0005615:extracellular space;GO:0005634:nucleus;GO:0005737:cytoplasm;GO:0005765:lysosomal membrane;GO:0005793:endoplasmic reticulum-Golgi intermediate compartment;GO:0005886:plasma membrane;GO:0009897:external side of plasma membrane;GO:0016021:integral component of membrane;GO:0070062:extracellular exosome;	GO:0008270:zinc ion binding;GO:0042277:peptide binding;GO:0070006:metalloaminopeptidase activity;	K11140
ENSMUSG00000019779	318.465	2.05342	0.108246	18.9699	3.03e-80	1.48e-78	10	34483399	34611278	+	Frk	fyn-related kinase [Source:MGI Symbol%3BAcc:MGI:103265]	GO:0000122:negative regulation of transcription from RNA polymerase II promoter;GO:0007169:transmembrane receptor protein tyrosine kinase signaling pathway;GO:0016477:cell migration;GO:0030154:cell differentiation;GO:0038083:peptidyl-tyrosine autophosphorylation;GO:0042127:regulation of cell proliferation;GO:0045087:innate immune response;	GO:0005654:nucleoplasm;GO:0005829:cytosol;GO:0031234:extrinsic component of cytoplasmic side of plasma membrane;GO:0070062:extracellular exosome;	GO:0004715:non-membrane spanning protein tyrosine kinase activity;GO:0005102:receptor binding;GO:0005524:ATP binding;	K08892
ENSMUSG00000032024	1326.53	-1.04683	0.0552189	-18.9578	3.81e-80	1.86e-78	9	40685962	40785319	+	Clmp	CXADR-like membrane protein [Source:MGI Symbol%3BAcc:MGI:1918816]	GO:0048565:digestive tract development;	GO:0005881:cytoplasmic microtubule;GO:0005886:plasma membrane;GO:0005923:bicellular tight junction;GO:0009986:cell surface;GO:0016021:integral component of membrane;GO:0070062:extracellular exosome;	GO:0003674:molecular_function;	K06789
ENSMUSG00000030351	503.933	-1.72077	0.0908255	-18.9459	4.77e-80	2.32e-78	6	127887589	127953977	+	Tspan11	tetraspanin 11 [Source:MGI Symbol%3BAcc:MGI:1915748]	GO:0007166:cell surface receptor signaling pathway;	GO:0005887:integral component of plasma membrane;	GO:0003674:molecular_function;	K17352
ENSMUSG00000038418	2107.83	-0.933235	0.0492595	-18.9453	4.83e-80	2.34e-78	18	34859823	34864984	+	Egr1	early growth response 1 [Source:MGI Symbol%3BAcc:MGI:95295]	GO:0000122:negative regulation of transcription from RNA polymerase II promoter;GO:0001666:response to hypoxia;GO:0002931:response to ischemia;GO:0006355:regulation of transcription, DNA-templated;GO:0006366:transcription from RNA polymerase II promoter;GO:0009749:response to glucose;GO:0030217:T cell differentiation;GO:0030509:BMP signaling pathway;GO:0032868:response to insulin;GO:0033233:regul…	GO:0005634:nucleus;GO:0005654:nucleoplasm;GO:0005737:cytoplasm;	GO:0000976:transcription regulatory region sequence-specific DNA binding;GO:0000977:RNA polymerase II regulatory region sequence-specific DNA binding;GO:0000982:RNA polymerase II core promoter proximal region sequence-specific DNA binding transcription factor activity;GO:0001077:RNA polymerase II core promoter proximal region sequence-specific DNA binding transcription factor activity involved in…	K09203
ENSMUSG00000031858	1584.71	-1.03226	0.054598	-18.9066	1.01e-79	4.87e-78	8	70016123	70042734	-	Mau2	MAU2 sister chromatid cohesion factor [Source:MGI Symbol%3BAcc:MGI:1921799]	GO:0034088:maintenance of mitotic sister chromatid cohesion;GO:0051301:cell division;	GO:0000785:chromatin;GO:0005634:nucleus;GO:0005654:nucleoplasm;GO:0016604:nuclear body;GO:0032116:SMC loading complex;	GO:0003690:double-stranded DNA binding;GO:0047485:protein N-terminus binding;	K11266
ENSMUSG00000031948	5118.65	-0.706919	0.0374103	-18.8964	1.22e-79	5.9e-78	8	111993443	112011323	-	Kars	lysyl-tRNA synthetase [Source:MGI Symbol%3BAcc:MGI:1934754]	GO:0000187:activation of MAPK activity;GO:0002276:basophil activation involved in immune response;GO:0002741:positive regulation of cytokine secretion involved in immune response;GO:0006430:lysyl-tRNA aminoacylation;GO:0008285:negative regulation of cell proliferation;GO:0010759:positive regulation of macrophage chemotaxis;GO:0015966:diadenosine tetraphosphate biosynthetic process;GO:0033209:tumo…	GO:0005615:extracellular space;GO:0005634:nucleus;GO:0005739:mitochondrion;GO:0005829:cytosol;GO:0017101:aminoacyl-tRNA synthetase multienzyme complex;	GO:0003676:nucleic acid binding;GO:0003877:ATP adenylyltransferase activity;GO:0004824:lysine-tRNA ligase activity;GO:0005524:ATP binding;GO:0046872:metal ion binding;GO:0097110:scaffold protein binding;	K04567
ENSMUSG00000031808	811.594	-1.33252	0.0705205	-18.8955	1.24e-79	5.98e-78	8	71568882	71587302	+	Slc27a1	solute carrier family 27 (fatty acid transporter)%2C member 1 [Source:MGI Symbol%3BAcc:MGI:1347098]	GO:0001579:medium-chain fatty acid transport;GO:0001676:long-chain fatty acid metabolic process;GO:0006646:phosphatidylethanolamine biosynthetic process;GO:0006654:phosphatidic acid biosynthetic process;GO:0006655:phosphatidylglycerol biosynthetic process;GO:0006656:phosphatidylcholine biosynthetic process;GO:0006659:phosphatidylserine biosynthetic process;GO:0006661:phosphatidylinositol biosynth…	GO:0005783:endoplasmic reticulum;GO:0005886:plasma membrane;GO:0016020:membrane;GO:0016021:integral component of membrane;GO:0031410:cytoplasmic vesicle;	GO:0000166:nucleotide binding;GO:0004467:long-chain fatty acid-CoA ligase activity;GO:0015245:fatty acid transporter activity;GO:0031957:very long-chain fatty acid-CoA ligase activity;GO:0042803:protein homodimerization activity;	K08745
ENSMUSG00000022564	3717.86	0.77184	0.0408572	18.8911	1.35e-79	6.48e-78	15	76246807	76249904	+	Grina	glutamate receptor%2C ionotropic%2C N-methyl D-aspartate-associated protein 1 (glutamate binding) [Source:MGI Symbol%3BAcc:MGI:1913418]	GO:0032469:endoplasmic reticulum calcium ion homeostasis;GO:1902236:negative regulation of endoplasmic reticulum stress-induced intrinsic apoptotic signaling pathway;	GO:0005783:endoplasmic reticulum;GO:0005794:Golgi apparatus;GO:0016021:integral component of membrane;	GO:0044325:ion channel binding;	K06890
ENSMUSG00000028796	3612.15	-0.835562	0.0442868	-18.8671	2.13e-79	1.02e-77	4	128654702	128752881	+	Phc2	polyhomeotic-like 2 (Drosophila) [Source:MGI Symbol%3BAcc:MGI:1860454]	GO:0007275:multicellular organismal development;GO:0007283:spermatogenesis;	GO:0000792:heterochromatin;GO:0005634:nucleus;GO:0005654:nucleoplasm;GO:0031519:PcG protein complex;GO:0035102:PRC1 complex;	GO:0003677:DNA binding;GO:0005515:protein binding;GO:0008270:zinc ion binding;GO:0042802:identical protein binding;	K11457;K11456
ENSMUSG00000025665	162.084	6.35805	0.337118	18.86	2.43e-79	1.16e-77	X	111388192	111537959	-	Rps6ka6	ribosomal protein S6 kinase polypeptide 6 [Source:MGI Symbol%3BAcc:MGI:1914321]	GO:0006468:protein phosphorylation;GO:0006978:DNA damage response, signal transduction by p53 class mediator resulting in transcription of p21 class mediator;GO:0045992:negative regulation of embryonic development;GO:0070373:negative regulation of ERK1 and ERK2 cascade;GO:2000381:negative regulation of mesoderm development;	GO:0001650:fibrillar center;GO:0005634:nucleus;GO:0005730:nucleolus;GO:0005737:cytoplasm;GO:0005739:mitochondrion;GO:0005829:cytosol;	GO:0000287:magnesium ion binding;GO:0004674:protein serine/threonine kinase activity;GO:0005524:ATP binding;	K04373
ENSMUSG00000054675	441.08	1.78574	0.0947092	18.855	2.67e-79	1.27e-77	5	113793729	113800516	-	Tmem119	transmembrane protein 119 [Source:MGI Symbol%3BAcc:MGI:2385228]	GO:0001649:osteoblast differentiation;GO:0007283:spermatogenesis;GO:0030501:positive regulation of bone mineralization;GO:0031214:biomineral tissue development;GO:0033690:positive regulation of osteoblast proliferation;GO:0045669:positive regulation of osteoblast differentiation;GO:0048515:spermatid differentiation;GO:1903012:positive regulation of bone development;	GO:0005783:endoplasmic reticulum;GO:0005789:endoplasmic reticulum membrane;GO:0005886:plasma membrane;GO:0016021:integral component of membrane;	GO:0005515:protein binding;	-
ENSMUSG00000034777	192.774	-6.22293	0.330953	-18.8031	7.13e-79	3.39e-77	6	83711264	83738313	+	Vax2	ventral anterior homeobox 2 [Source:MGI Symbol%3BAcc:MGI:1346018]	GO:0000122:negative regulation of transcription from RNA polymerase II promoter;GO:0006351:transcription, DNA-templated;GO:0007409:axonogenesis;GO:0007601:visual perception;GO:0009950:dorsal/ventral axis specification;GO:0016055:Wnt signaling pathway;GO:0030900:forebrain development;GO:0043010:camera-type eye development;GO:0048048:embryonic eye morphogenesis;GO:0060041:retina development in came…	GO:0005634:nucleus;GO:0005737:cytoplasm;	GO:0001162:RNA polymerase II intronic transcription regulatory region sequence-specific DNA binding;GO:0001227:RNA polymerase II transcription regulatory region sequence-specific DNA binding transcription factor activity involved in negative regulation of transcription;GO:0031490:chromatin DNA binding;	K09318
ENSMUSG00000105987	1594.44	1.0004	0.0533918	18.737	2.47e-78	1.17e-76	5	23698296	23712667	-	AI506816	expressed sequence AI506816 [Source:MGI Symbol%3BAcc:MGI:2140929]	-	-	-	-
ENSMUSG00000025089	257.749	2.49403	0.133359	18.7017	4.8e-78	2.27e-76	19	58235604	58455909	-	Gfra1	glial cell line derived neurotrophic factor family receptor alpha 1 [Source:MGI Symbol%3BAcc:MGI:1100842]	GO:0007169:transmembrane receptor protein tyrosine kinase signaling pathway;GO:0007399:nervous system development;GO:0009653:anatomical structure morphogenesis;	GO:0005886:plasma membrane;GO:0019898:extrinsic component of membrane;GO:0031225:anchored component of membrane;GO:0070062:extracellular exosome;	GO:0004872:receptor activity;	K19895
ENSMUSG00000074676	148.423	5.82028	0.312155	18.6455	1.37e-77	6.49e-76	2	152931898	152933208	-	Foxs1	forkhead box S1 [Source:MGI Symbol%3BAcc:MGI:95546]	GO:0000122:negative regulation of transcription from RNA polymerase II promoter;GO:0001568:blood vessel development;GO:0006351:transcription, DNA-templated;GO:0009653:anatomical structure morphogenesis;GO:0030154:cell differentiation;GO:0040018:positive regulation of multicellular organism growth;GO:0043433:negative regulation of sequence-specific DNA binding transcription factor activity;GO:0045…	GO:0005634:nucleus;	GO:0000978:RNA polymerase II core promoter proximal region sequence-specific DNA binding;GO:0001078:RNA polymerase II core promoter proximal region sequence-specific DNA binding transcription factor activity involved in negative regulation of transcription;GO:0003677:DNA binding;	K09412
ENSMUSG00000025875	309.665	-2.1779	0.116822	-18.6428	1.44e-77	6.8e-76	13	54789377	54796776	+	Tspan17	tetraspanin 17 [Source:MGI Symbol%3BAcc:MGI:1921507]	GO:0007166:cell surface receptor signaling pathway;GO:0051604:protein maturation;GO:0072594:establishment of protein localization to organelle;	GO:0005887:integral component of plasma membrane;	GO:0019899:enzyme binding;	K10303
ENSMUSG00000037706	2471.08	0.887369	0.0476207	18.6341	1.7e-77	7.99e-76	7	143052739	143067934	+	Cd81	CD81 antigen [Source:MGI Symbol%3BAcc:MGI:1096398]	GO:0000187:activation of MAPK activity;GO:0007166:cell surface receptor signaling pathway;GO:0008104:protein localization;GO:0008284:positive regulation of cell proliferation;GO:0030307:positive regulation of cell growth;GO:0030890:positive regulation of B cell proliferation;GO:0031623:receptor internalization;GO:0031647:regulation of protein stability;GO:0043128:positive regulation of 1-phosphat…	GO:0001772:immunological synapse;GO:0005887:integral component of plasma membrane;GO:0005925:focal adhesion;GO:0016020:membrane;GO:0016323:basolateral plasma membrane;GO:0031982:vesicle;GO:0070062:extracellular exosome;	GO:0001618:virus receptor activity;GO:0005515:protein binding;GO:0023026:MHC class II protein complex binding;GO:1990459:transferrin receptor binding;	K06508
ENSMUSG00000031485	1655.2	-0.959507	0.051507	-18.6287	1.88e-77	8.82e-76	8	27042555	27056132	+	Prosc	proline synthetase co-transcribed [Source:MGI Symbol%3BAcc:MGI:1891207]	-	GO:0005622:intracellular;GO:0005739:mitochondrion;GO:0070062:extracellular exosome;	GO:0030170:pyridoxal phosphate binding;	K06997
ENSMUSG00000027422	5144.65	-0.70643	0.0380416	-18.57	5.63e-77	2.63e-75	2	143947395	144011263	-	Rrbp1	ribosome binding protein 1 [Source:MGI Symbol%3BAcc:MGI:1932395]	GO:0006412:translation;GO:0007165:signal transduction;GO:0015031:protein transport;	GO:0005840:ribosome;GO:0030176:integral component of endoplasmic reticulum membrane;	GO:0004872:receptor activity;GO:0005515:protein binding;	-
ENSMUSG00000068040	1533.63	-1.07939	0.0581873	-18.5503	8.1e-77	3.78e-75	2	153161303	153210466	+	Tm9sf4	transmembrane 9 superfamily protein member 4 [Source:MGI Symbol%3BAcc:MGI:2139220]	GO:0001666:response to hypoxia;GO:0006909:phagocytosis;GO:0007155:cell adhesion;GO:0051453:regulation of intracellular pH;GO:0070072:vacuolar proton-transporting V-type ATPase complex assembly;GO:0070863:positive regulation of protein exit from endoplasmic reticulum;GO:2000010:positive regulation of protein localization to cell surface;	GO:0005769:early endosome;GO:0005794:Golgi apparatus;GO:0016021:integral component of membrane;	GO:0003674:molecular_function;	K17086
ENSMUSG00000038102	1547.53	-1.04291	0.0562225	-18.5496	8.21e-77	3.82e-75	8	47490115	47533470	-	Trappc11	trafficking protein particle complex 11 [Source:MGI Symbol%3BAcc:MGI:2444585]	GO:0006888:ER to Golgi vesicle-mediated transport;GO:0007030:Golgi organization;GO:0008150:biological_process;GO:0051259:protein oligomerization;GO:0061635:regulation of protein complex stability;	GO:0005794:Golgi apparatus;GO:0030008:TRAPP complex;	GO:0003674:molecular_function;	K20308
ENSMUSG00000024302	368.329	1.94237	0.104778	18.538	1.02e-76	4.73e-75	18	23415135	23659715	+	Dtna	dystrobrevin alpha [Source:MGI Symbol%3BAcc:MGI:106039]	-	GO:0005737:cytoplasm;GO:0016014:dystrobrevin complex;GO:0030054:cell junction;GO:0042383:sarcolemma;GO:0043234:protein complex;GO:0045202:synapse;	GO:0005515:protein binding;GO:0008270:zinc ion binding;	-
ENSMUSG00000006273	2263.11	-0.864294	0.0466249	-18.5372	1.04e-76	4.79e-75	8	69088646	69113711	+	Atp6v1b2	ATPase%2C H+ transporting%2C lysosomal V1 subunit B2 [Source:MGI Symbol%3BAcc:MGI:109618]	GO:0015991:ATP hydrolysis coupled proton transport;GO:0046034:ATP metabolic process;	GO:0001726:ruffle;GO:0005737:cytoplasm;GO:0005765:lysosomal membrane;GO:0005829:cytosol;GO:0005886:plasma membrane;GO:0005902:microvillus;GO:0012505:endomembrane system;GO:0016021:integral component of membrane;GO:0033180:proton-transporting V-type ATPase, V1 domain;GO:0042470:melanosome;GO:0043209:myelin sheath;GO:0043231:intracellular membrane-bounded organelle;GO:0070062:extracellular exosome;	GO:0005524:ATP binding;GO:0016820:hydrolase activity, acting on acid anhydrides, catalyzing transmembrane movement of substances;	K02147
ENSMUSG00000031622	3547.6	-0.8499	0.0458573	-18.5336	1.11e-76	5.11e-75	8	72723285	72758201	+	Sin3b	transcriptional regulator%2C SIN3B (yeast) [Source:MGI Symbol%3BAcc:MGI:107158]	GO:0000122:negative regulation of transcription from RNA polymerase II promoter;GO:0006351:transcription, DNA-templated;GO:0016575:histone deacetylation;GO:0045892:negative regulation of transcription, DNA-templated;	GO:0000805:X chromosome;GO:0000806:Y chromosome;GO:0001741:XY body;GO:0005634:nucleus;GO:0005737:cytoplasm;GO:0016580:Sin3 complex;GO:0030849:autosome;	GO:0001106:RNA polymerase II transcription corepressor activity;GO:0003682:chromatin binding;GO:0003714:transcription corepressor activity;GO:0004407:histone deacetylase activity;GO:0005515:protein binding;	-
ENSMUSG00000039126	999.73	1.32862	0.0717055	18.5288	1.21e-76	5.57e-75	19	16956118	17223932	+	Prune2	prune homolog 2 [Source:MGI Symbol%3BAcc:MGI:1925004]	GO:0006915:apoptotic process;	GO:0005737:cytoplasm;	GO:0016462:pyrophosphatase activity;	K18449
ENSMUSG00000055116	751.42	-1.40467	0.0758184	-18.5267	1.26e-76	5.78e-75	7	113207465	113314126	+	Arntl	aryl hydrocarbon receptor nuclear translocator-like [Source:MGI Symbol%3BAcc:MGI:1096381]	GO:0000060:protein import into nucleus, translocation;GO:0006355:regulation of transcription, DNA-templated;GO:0006366:transcription from RNA polymerase II promoter;GO:0007283:spermatogenesis;GO:0007623:circadian rhythm;GO:0032007:negative regulation of TOR signaling;GO:0032922:circadian regulation of gene expression;GO:0042176:regulation of protein catabolic process;GO:0042634:regulation of hair…	GO:0005634:nucleus;GO:0005654:nucleoplasm;GO:0005667:transcription factor complex;GO:0005737:cytoplasm;GO:0005829:cytosol;GO:0016604:nuclear body;GO:0016605:PML body;GO:0033391:chromatoid body;GO:0043231:intracellular membrane-bounded organelle;	GO:0000976:transcription regulatory region sequence-specific DNA binding;GO:0000982:RNA polymerase II core promoter proximal region sequence-specific DNA binding transcription factor activity;GO:0001046:core promoter sequence-specific DNA binding;GO:0001047:core promoter binding;GO:0001077:RNA polymerase II core promoter proximal region sequence-specific DNA binding transcription factor activity …	K02296
ENSMUSG00000031488	627.362	-1.59463	0.0861064	-18.5193	1.44e-76	6.62e-75	8	27138773	27174646	-	Rab11fip1	RAB11 family interacting protein 1 (class I) [Source:MGI Symbol%3BAcc:MGI:1923017]	GO:0015031:protein transport;GO:0045055:regulated secretory pathway;GO:0070164:negative regulation of adiponectin secretion;	GO:0005737:cytoplasm;GO:0005829:cytosol;GO:0030670:phagocytic vesicle membrane;GO:0043231:intracellular membrane-bounded organelle;GO:0055037:recycling endosome;	GO:0017137:Rab GTPase binding;	K12484
ENSMUSG00000037300	2367.2	-0.883273	0.0478736	-18.4501	5.2e-76	2.38e-74	8	124671333	124721983	-	Ttc13	tetratricopeptide repeat domain 13 [Source:MGI Symbol%3BAcc:MGI:2384573]	GO:0008150:biological_process;	GO:0005575:cellular_component;	GO:0003674:molecular_function;	-
ENSMUSG00000031483	1911.48	-0.9855	0.0534162	-18.4495	5.27e-76	2.4e-74	8	27023261	27040328	+	Erlin2	ER lipid raft associated 2 [Source:MGI Symbol%3BAcc:MGI:2387215]	GO:0008203:cholesterol metabolic process;GO:0030433:ER-associated ubiquitin-dependent protein catabolic process;GO:0032933:SREBP signaling pathway;GO:0045541:negative regulation of cholesterol biosynthetic process;GO:0045717:negative regulation of fatty acid biosynthetic process;	GO:0005783:endoplasmic reticulum;GO:0005789:endoplasmic reticulum membrane;GO:0005829:cytosol;GO:0005886:plasma membrane;GO:0016021:integral component of membrane;GO:0043234:protein complex;GO:0045121:membrane raft;GO:0070062:extracellular exosome;	GO:0005515:protein binding;GO:0015485:cholesterol binding;GO:0031625:ubiquitin protein ligase binding;	-
ENSMUSG00000062373	1353.29	1.03557	0.0561321	18.4488	5.33e-76	2.43e-74	15	58782269	58823530	-	Tmem65	transmembrane protein 65 [Source:MGI Symbol%3BAcc:MGI:1922118]	GO:0003231:cardiac ventricle development;GO:1903779:regulation of cardiac conduction;	GO:0005739:mitochondrion;GO:0005743:mitochondrial inner membrane;GO:0005886:plasma membrane;GO:0014704:intercalated disc;GO:0016021:integral component of membrane;	GO:0005515:protein binding;	-
ENSMUSG00000029108	148.276	6.05119	0.328679	18.4107	1.08e-75	4.9e-74	5	57717967	58133230	+	Pcdh7	protocadherin 7 [Source:MGI Symbol%3BAcc:MGI:1860487]	GO:0007156:homophilic cell adhesion via plasma membrane adhesion molecules;GO:0008150:biological_process;	GO:0005886:plasma membrane;GO:0005887:integral component of plasma membrane;	GO:0005509:calcium ion binding;GO:0005515:protein binding;	K16498
ENSMUSG00000034863	1056.5	-1.23365	0.0670479	-18.3995	1.33e-75	6.01e-74	8	71476019	71485963	-	Ano8	anoctamin 8 [Source:MGI Symbol%3BAcc:MGI:2687327]	GO:0006821:chloride transport;GO:1902476:chloride transmembrane transport;	GO:0005622:intracellular;GO:0005886:plasma membrane;GO:0016021:integral component of membrane;	GO:0005229:intracellular calcium activated chloride channel activity;	K19502
ENSMUSG00000073565	153.974	-4.6403	0.252253	-18.3954	1.43e-75	6.46e-74	18	51117898	51304641	+	Prr16	proline rich 16 [Source:MGI Symbol%3BAcc:MGI:1918623]	GO:0045727:positive regulation of translation;GO:0045793:positive regulation of cell size;	GO:0005575:cellular_component;	GO:0003674:molecular_function;	-
ENSMUSG00000052488	2420.46	-0.938594	0.0511387	-18.3539	3.07e-75	1.39e-73	8	72460489	72475226	-	Cherp	calcium homeostasis endoplasmic reticulum protein [Source:MGI Symbol%3BAcc:MGI:106417]	GO:0006396:RNA processing;GO:0006874:cellular calcium ion homeostasis;GO:0008285:negative regulation of cell proliferation;GO:0051209:release of sequestered calcium ion into cytosol;GO:0051533:positive regulation of NFAT protein import into nucleus;	GO:0005737:cytoplasm;GO:0005783:endoplasmic reticulum;GO:0016020:membrane;GO:0048471:perinuclear region of cytoplasm;	GO:0003723:RNA binding;GO:0005515:protein binding;GO:0044325:ion channel binding;	K12841
ENSMUSG00000051236	2239.43	1.02098	0.0557011	18.3297	4.8e-75	2.16e-73	10	120781096	120899101	-	Msrb3	methionine sulfoxide reductase B3 [Source:MGI Symbol%3BAcc:MGI:2443538]	GO:0006979:response to oxidative stress;GO:0030091:protein repair;GO:0055114:oxidation-reduction process;	GO:0005739:mitochondrion;GO:0005783:endoplasmic reticulum;	GO:0008270:zinc ion binding;GO:0033743:peptide-methionine (R)-S-oxide reductase activity;	-
ENSMUSG00000017400	175.014	-6.10235	0.332933	-18.329	4.85e-75	2.18e-73	11	98036623	98053462	-	Stac2	SH3 and cysteine rich domain 2 [Source:MGI Symbol%3BAcc:MGI:2144518]	GO:0008150:biological_process;GO:0035556:intracellular signal transduction;	GO:0005575:cellular_component;GO:0005622:intracellular;	GO:0003674:molecular_function;GO:0046872:metal ion binding;	-
ENSMUSG00000034285	295.044	2.1039	0.114936	18.305	7.54e-75	3.38e-73	11	4873951	4894200	+	Nipsnap1	nipsnap homolog 1 (C. elegans) [Source:MGI Symbol%3BAcc:MGI:1278344]	GO:0019233:sensory perception of pain;	GO:0005739:mitochondrion;GO:0005743:mitochondrial inner membrane;GO:0016020:membrane;GO:0097060:synaptic membrane;	GO:0005515:protein binding;GO:0042165:neurotransmitter binding;	-
ENSMUSG00000072941	352.823	-2.06672	0.113001	-18.2894	1.01e-74	4.5e-73	5	52363791	52371418	+	Sod3	superoxide dismutase 3%2C extracellular [Source:MGI Symbol%3BAcc:MGI:103181]	GO:0001666:response to hypoxia;GO:0019430:removal of superoxide radicals;GO:0034599:cellular response to oxidative stress;GO:0046688:response to copper ion;GO:0055114:oxidation-reduction process;	GO:0005615:extracellular space;GO:0005634:nucleus;GO:0005737:cytoplasm;GO:0005796:Golgi lumen;GO:0031012:extracellular matrix;GO:0070062:extracellular exosome;	GO:0004784:superoxide dismutase activity;GO:0005507:copper ion binding;GO:0005515:protein binding;GO:0008270:zinc ion binding;	K16627
ENSMUSG00000001657	952.189	1.21152	0.0662447	18.2885	1.02e-74	4.56e-73	15	102990607	102994111	+	Hoxc8	homeobox C8 [Source:MGI Symbol%3BAcc:MGI:96198]	GO:0000122:negative regulation of transcription from RNA polymerase II promoter;GO:0006351:transcription, DNA-templated;GO:0009952:anterior/posterior pattern specification;GO:0030182:neuron differentiation;GO:0048705:skeletal system morphogenesis;	GO:0005634:nucleus;GO:0005654:nucleoplasm;GO:0015630:microtubule cytoskeleton;	GO:0003677:DNA binding;GO:0003700:sequence-specific DNA binding transcription factor activity;GO:0043565:sequence-specific DNA binding;	K09308
ENSMUSG00000026667	1878.37	-0.896787	0.0490566	-18.2807	1.18e-74	5.25e-73	1	170193420	170215397	-	Uhmk1	U2AF homology motif (UHM) kinase 1 [Source:MGI Symbol%3BAcc:MGI:1341908]	GO:0007050:cell cycle arrest;GO:0018105:peptidyl-serine phosphorylation;GO:0031175:neuron projection development;GO:0045948:positive regulation of translational initiation;GO:0046777:protein autophosphorylation;GO:0046825:regulation of protein export from nucleus;	GO:0000243:commitment complex;GO:0005634:nucleus;GO:0005654:nucleoplasm;GO:0005737:cytoplasm;GO:0005794:Golgi apparatus;GO:0016607:nuclear speck;GO:0030424:axon;GO:0032839:dendrite cytoplasm;GO:0071004:U2-type prespliceosome;GO:0071598:neuronal ribonucleoprotein granule;GO:0089701:U2AF;	GO:0004672:protein kinase activity;GO:0004674:protein serine/threonine kinase activity;GO:0005515:protein binding;GO:0005524:ATP binding;GO:0008187:poly-pyrimidine tract binding;GO:0030628:pre-mRNA 3'-splice site binding;GO:0043021:ribonucleoprotein complex binding;	-
ENSMUSG00000061013	147.253	6.21695	0.340687	18.2483	2.14e-74	9.48e-73	18	6910459	7004780	-	Mkx	mohawk homeobox [Source:MGI Symbol%3BAcc:MGI:2687286]	GO:0000122:negative regulation of transcription from RNA polymerase II promoter;GO:0002932:tendon sheath development;GO:0006366:transcription from RNA polymerase II promoter;GO:0007517:muscle organ development;GO:0010468:regulation of gene expression;GO:0010628:positive regulation of gene expression;GO:0030199:collagen fibril organization;GO:0032967:positive regulation of collagen biosynthetic pr…	GO:0005634:nucleus;GO:0005667:transcription factor complex;	GO:0000978:RNA polymerase II core promoter proximal region sequence-specific DNA binding;GO:0000981:sequence-specific DNA binding RNA polymerase II transcription factor activity;GO:0001077:RNA polymerase II core promoter proximal region sequence-specific DNA binding transcription factor activity involved in positive regulation of transcription;GO:0001078:RNA polymerase II core promoter proximal r…	-
ENSMUSG00000031537	1724.67	-0.962436	0.0528226	-18.2202	3.57e-74	1.58e-72	8	22659212	22706589	-	Ikbkb	inhibitor of kappaB kinase beta [Source:MGI Symbol%3BAcc:MGI:1338071]	GO:0001782:B cell homeostasis;GO:0006468:protein phosphorylation;GO:0006954:inflammatory response;GO:0007249:I-kappaB kinase/NF-kappaB signaling;GO:0007252:I-kappaB phosphorylation;GO:0009653:anatomical structure morphogenesis;GO:0010765:positive regulation of sodium ion transport;GO:0018105:peptidyl-serine phosphorylation;GO:0023014:signal transduction by protein phosphorylation;GO:0030866:corti…	GO:0005634:nucleus;GO:0005737:cytoplasm;GO:0005829:cytosol;GO:0008385:IkappaB kinase complex;GO:0009898:cytoplasmic side of plasma membrane;GO:0035631:CD40 receptor complex;GO:0045121:membrane raft;	GO:0004672:protein kinase activity;GO:0004674:protein serine/threonine kinase activity;GO:0004702:receptor signaling protein serine/threonine kinase activity;GO:0005515:protein binding;GO:0005524:ATP binding;GO:0008384:IkappaB kinase activity;GO:0019901:protein kinase binding;GO:0042803:protein homodimerization activity;GO:0046982:protein heterodimerization activity;GO:0097110:scaffold protein bi…	K07209
ENSMUSG00000039103	967.47	1.32068	0.0725229	18.2106	4.25e-74	1.88e-72	3	152236982	152266350	-	Nexn	nexilin [Source:MGI Symbol%3BAcc:MGI:1916060]	GO:0030334:regulation of cell migration;GO:0048739:cardiac muscle fiber development;GO:0051493:regulation of cytoskeleton organization;	GO:0005856:cytoskeleton;GO:0005925:focal adhesion;GO:0030018:Z disc;	GO:0008307:structural constituent of muscle;GO:0051015:actin filament binding;	-
ENSMUSG00000027506	993.039	-1.20594	0.0662416	-18.2051	4.7e-74	2.07e-72	3	8925593	9004723	-	Tpd52	tumor protein D52 [Source:MGI Symbol%3BAcc:MGI:107749]	GO:0008284:positive regulation of cell proliferation;GO:0030183:B cell differentiation;	GO:0005737:cytoplasm;GO:0005783:endoplasmic reticulum;GO:0048471:perinuclear region of cytoplasm;	GO:0005509:calcium ion binding;GO:0005515:protein binding;GO:0042803:protein homodimerization activity;GO:0046982:protein heterodimerization activity;	-
ENSMUSG00000067194	3693.63	0.852514	0.0468415	18.2	5.16e-74	2.27e-72	X	159372178	159389928	+	Eif1ax	eukaryotic translation initiation factor 1A%2C X-linked [Source:MGI Symbol%3BAcc:MGI:1913485]	GO:0006413:translational initiation;	GO:0005575:cellular_component;	GO:0003743:translation initiation factor activity;	K03236
ENSMUSG00000029636	374.422	-1.92596	0.105823	-18.1998	5.18e-74	2.27e-72	5	146384985	146473615	+	Wasf3	WAS protein family%2C member 3 [Source:MGI Symbol%3BAcc:MGI:2658986]	GO:0007010:cytoskeleton organization;GO:0008360:regulation of cell shape;GO:0014003:oligodendrocyte development;GO:0030032:lamellipodium assembly;GO:0030036:actin cytoskeleton organization;GO:0031643:positive regulation of myelination;	GO:0005737:cytoplasm;GO:0005856:cytoskeleton;GO:0030027:lamellipodium;GO:0070062:extracellular exosome;	GO:0003674:molecular_function;GO:0003779:actin binding;	K06083
ENSMUSG00000020695	2534.2	-0.963442	0.0529455	-18.1969	5.47e-74	2.39e-72	11	105292643	105351139	+	Mrc2	mannose receptor%2C C type 2 [Source:MGI Symbol%3BAcc:MGI:107818]	GO:0001649:osteoblast differentiation;GO:0006897:endocytosis;GO:0007165:signal transduction;GO:0030574:collagen catabolic process;	GO:0005886:plasma membrane;GO:0005887:integral component of plasma membrane;GO:0005925:focal adhesion;GO:0009986:cell surface;GO:0016020:membrane;	GO:0004888:transmembrane signaling receptor activity;GO:0005518:collagen binding;GO:0030246:carbohydrate binding;	K06560
ENSMUSG00000036446	169.942	-6.06728	0.333726	-18.1804	7.37e-74	3.22e-72	10	97565128	97572703	+	Lum	lumican [Source:MGI Symbol%3BAcc:MGI:109347]	GO:0007409:axonogenesis;GO:0007601:visual perception;GO:0014070:response to organic cyclic compound;GO:0030199:collagen fibril organization;GO:0032914:positive regulation of transforming growth factor beta1 production;GO:0045944:positive regulation of transcription from RNA polymerase II promoter;GO:0051216:cartilage development;GO:0070848:response to growth factor;	GO:0005578:proteinaceous extracellular matrix;GO:0005583:fibrillar collagen trimer;GO:0005615:extracellular space;GO:0031012:extracellular matrix;GO:0070062:extracellular exosome;	GO:0005518:collagen binding;	K08122
ENSMUSG00000038668	1231.37	-1.04829	0.0576663	-18.1786	7.62e-74	3.32e-72	4	58435255	58553898	-	Lpar1	lysophosphatidic acid receptor 1 [Source:MGI Symbol%3BAcc:MGI:108429]	GO:0000187:activation of MAPK activity;GO:0007186:G-protein coupled receptor signaling pathway;GO:0007193:adenylate cyclase-inhibiting G-protein coupled receptor signaling pathway;GO:0007202:activation of phospholipase C activity;GO:0008360:regulation of cell shape;GO:0010977:negative regulation of neuron projection development;GO:0014003:oligodendrocyte development;GO:0021549:cerebellum developm…	GO:0005768:endosome;GO:0005886:plasma membrane;GO:0005887:integral component of plasma membrane;GO:0009986:cell surface;GO:0030139:endocytic vesicle;GO:0043025:neuronal cell body;GO:0043197:dendritic spine;GO:0043198:dendritic shaft;	GO:0001965:G-protein alpha-subunit binding;GO:0005515:protein binding;GO:0030165:PDZ domain binding;GO:0035727:lysophosphatidic acid binding;GO:0070915:lysophosphatidic acid receptor activity;	K04289
ENSMUSG00000067017	855.954	1.32343	0.0728088	18.1768	7.87e-74	3.42e-72	1	105455971	105458829	+	Gm3608	predicted gene 3608 [Source:MGI Symbol%3BAcc:MGI:3804932]	-	-	-	K10364
ENSMUSG00000031696	5999.75	-0.714802	0.0393342	-18.1726	8.51e-74	3.69e-72	8	85260392	85299802	-	Vps35	VPS35 retromer complex component [Source:MGI Symbol%3BAcc:MGI:1890467]	GO:0006624:vacuolar protein processing;GO:0007040:lysosome organization;GO:0010628:positive regulation of gene expression;GO:0010629:negative regulation of gene expression;GO:0010821:regulation of mitochondrion organization;GO:0031647:regulation of protein stability;GO:0031648:protein destabilization;GO:0032268:regulation of cellular protein metabolic process;GO:0032463:negative regulation of pro…	GO:0005737:cytoplasm;GO:0005739:mitochondrion;GO:0005764:lysosome;GO:0005765:lysosomal membrane;GO:0005768:endosome;GO:0005769:early endosome;GO:0005770:late endosome;GO:0005829:cytosol;GO:0010008:endosome membrane;GO:0014069:postsynaptic density;GO:0016021:integral component of membrane;GO:0030904:retromer complex;GO:0030906:retromer complex, inner shell;GO:0043005:neuron projection;GO:0043025:n…	GO:0005515:protein binding;GO:0008565:protein transporter activity;GO:0031748:D1 dopamine receptor binding;	K18468
ENSMUSG00000030203	958.445	-1.19677	0.0658943	-18.162	1.03e-73	4.47e-72	6	134715468	134792625	-	Dusp16	dual specificity phosphatase 16 [Source:MGI Symbol%3BAcc:MGI:1917936]	GO:0000188:inactivation of MAPK activity;GO:0016311:dephosphorylation;GO:0035335:peptidyl-tyrosine dephosphorylation;GO:0043409:negative regulation of MAPK cascade;	GO:0005634:nucleus;GO:0005654:nucleoplasm;GO:0005737:cytoplasm;GO:0005829:cytosol;	GO:0004725:protein tyrosine phosphatase activity;GO:0005515:protein binding;GO:0016791:phosphatase activity;GO:0017017:MAP kinase tyrosine/serine/threonine phosphatase activity;	K04459
ENSMUSG00000028649	3916.15	-0.894012	0.049226	-18.1614	1.04e-73	4.51e-72	4	123349633	123684360	-	Macf1	microtubule-actin crosslinking factor 1 [Source:MGI Symbol%3BAcc:MGI:108559]	GO:0001707:mesoderm formation;GO:0006620:posttranslational protein targeting to membrane;GO:0007163:establishment or maintenance of cell polarity;GO:0008104:protein localization;GO:0010632:regulation of epithelial cell migration;GO:0016055:Wnt signaling pathway;GO:0030177:positive regulation of Wnt signaling pathway;GO:0032886:regulation of microtubule-based process;GO:0042060:wound healing;GO:00…	GO:0005737:cytoplasm;GO:0005794:Golgi apparatus;GO:0005874:microtubule;GO:0005938:cell cortex;GO:0014069:postsynaptic density;GO:0015629:actin cytoskeleton;GO:0015630:microtubule cytoskeleton;GO:0016020:membrane;GO:0032587:ruffle membrane;	GO:0003779:actin binding;GO:0005509:calcium ion binding;GO:0005515:protein binding;GO:0008017:microtubule binding;GO:0016887:ATPase activity;	K19827
ENSMUSG00000036712	2621.9	-0.958716	0.0528314	-18.1467	1.36e-73	5.87e-72	8	88697028	88751945	+	Cyld	CYLD lysine 63 deubiquitinase [Source:MGI Symbol%3BAcc:MGI:1921506]	GO:0002181:cytoplasmic translation;GO:0006511:ubiquitin-dependent protein catabolic process;GO:0007346:regulation of mitotic cell cycle;GO:0010803:regulation of tumor necrosis factor-mediated signaling pathway;GO:0016055:Wnt signaling pathway;GO:0016579:protein deubiquitination;GO:0032088:negative regulation of NF-kappaB transcription factor activity;GO:0042347:negative regulation of NF-kappaB im…	GO:0005813:centrosome;GO:0005819:spindle;GO:0005829:cytosol;GO:0005881:cytoplasmic microtubule;GO:0030496:midbody;GO:0031234:extrinsic component of cytoplasmic side of plasma membrane;GO:0036064:ciliary basal body;GO:0048471:perinuclear region of cytoplasm;GO:0097542:ciliary tip;	GO:0003735:structural constituent of ribosome;GO:0004843:ubiquitin-specific protease activity;GO:0005515:protein binding;GO:0008270:zinc ion binding;GO:0019901:protein kinase binding;GO:0061578:Lys63-specific deubiquitinase activity;GO:0070064:proline-rich region binding;GO:1990380:Lys48-specific deubiquitinase activity;	K08601
ENSMUSG00000037370	253.346	2.24147	0.123624	18.1314	1.8e-73	7.74e-72	10	24637914	24712159	-	Enpp1	ectonucleotide pyrophosphatase/phosphodiesterase 1 [Source:MGI Symbol%3BAcc:MGI:97370]	GO:0006091:generation of precursor metabolites and energy;GO:0006796:phosphate-containing compound metabolic process;GO:0006898:receptor-mediated endocytosis;GO:0006955:immune response;GO:0009143:nucleoside triphosphate catabolic process;GO:0030279:negative regulation of ossification;GO:0030308:negative regulation of cell growth;GO:0030505:inorganic diphosphate transport;GO:0030643:cellular phosp…	GO:0005615:extracellular space;GO:0005765:lysosomal membrane;GO:0005886:plasma membrane;GO:0005887:integral component of plasma membrane;GO:0009986:cell surface;GO:0016021:integral component of membrane;GO:0016323:basolateral plasma membrane;	GO:0003676:nucleic acid binding;GO:0004528:phosphodiesterase I activity;GO:0004551:nucleotide diphosphatase activity;GO:0005044:scavenger receptor activity;GO:0005158:insulin receptor binding;GO:0005509:calcium ion binding;GO:0005524:ATP binding;GO:0008270:zinc ion binding;GO:0030247:polysaccharide binding;GO:0035529:NADH pyrophosphatase activity;GO:0042803:protein homodimerization activity;GO:00…	K01513
ENSMUSG00000030255	217.158	2.49859	0.137839	18.1269	1.96e-73	8.39e-72	6	145931641	145965223	+	Sspn	sarcospan [Source:MGI Symbol%3BAcc:MGI:1353511]	-	GO:0005887:integral component of plasma membrane;GO:0016010:dystrophin-associated glycoprotein complex;GO:0030054:cell junction;GO:0030133:transport vesicle;GO:0042383:sarcolemma;GO:0045211:postsynaptic membrane;	-	-
ENSMUSG00000002455	2920.96	-0.792139	0.0437342	-18.1126	2.54e-73	1.09e-71	2	181591868	181655660	+	Prpf6	pre-mRNA splicing factor 6 [Source:MGI Symbol%3BAcc:MGI:1922946]	GO:0000244:spliceosomal tri-snRNP complex assembly;GO:0006403:RNA localization;GO:0045944:positive regulation of transcription from RNA polymerase II promoter;	GO:0005634:nucleus;GO:0005682:U5 snRNP;GO:0016020:membrane;GO:0016607:nuclear speck;GO:0046540:U4/U6 x U5 tri-snRNP complex;GO:0071013:catalytic step 2 spliceosome;	GO:0003713:transcription coactivator activity;GO:0003723:RNA binding;GO:0043021:ribonucleoprotein complex binding;GO:0050681:androgen receptor binding;	K12855
ENSMUSG00000052485	244.652	2.35833	0.130225	18.1097	2.67e-73	1.14e-71	13	98686235	98694834	-	Tmem171	transmembrane protein 171 [Source:MGI Symbol%3BAcc:MGI:2685751]	GO:0008150:biological_process;	GO:0005575:cellular_component;GO:0016021:integral component of membrane;	GO:0003674:molecular_function;	-
ENSMUSG00000026335	1224.8	-1.05608	0.0583446	-18.1007	3.15e-73	1.34e-71	1	97795114	98095646	-	Pam	peptidylglycine alpha-amidating monooxygenase [Source:MGI Symbol%3BAcc:MGI:97475]	GO:0001519:peptide amidation;GO:0006518:peptide metabolic process;GO:0055114:oxidation-reduction process;	GO:0005829:cytosol;GO:0005887:integral component of plasma membrane;GO:0016020:membrane;GO:0030658:transport vesicle membrane;GO:0070062:extracellular exosome;	GO:0004504:peptidylglycine monooxygenase activity;GO:0004598:peptidylamidoglycolate lyase activity;GO:0005507:copper ion binding;GO:0008270:zinc ion binding;GO:0031418:L-ascorbic acid binding;	K18200
ENSMUSG00000004665	9993.81	0.850363	0.0470697	18.0661	5.9e-73	2.51e-71	10	79988584	79996062	+	Cnn2	calponin 2 [Source:MGI Symbol%3BAcc:MGI:105093]	GO:0010628:positive regulation of gene expression;GO:0030097:hemopoiesis;GO:0030336:negative regulation of cell migration;GO:0031032:actomyosin structure organization;GO:0032970:regulation of actin filament-based process;GO:0042060:wound healing;GO:0042127:regulation of cell proliferation;GO:0050765:negative regulation of phagocytosis;GO:0071260:cellular response to mechanical stimulus;	GO:0001725:stress fiber;GO:0005925:focal adhesion;GO:0016020:membrane;GO:0070062:extracellular exosome;	GO:0003779:actin binding;GO:0005516:calmodulin binding;GO:0045296:cadherin binding;	-
ENSMUSG00000039982	515.302	1.64648	0.091171	18.0592	6.68e-73	2.83e-71	19	12466341	12501996	-	Dtx4	deltex 4%2C E3 ubiquitin ligase [Source:MGI Symbol%3BAcc:MGI:2672905]	GO:0007219:Notch signaling pathway;GO:0008150:biological_process;GO:0016567:protein ubiquitination;	GO:0005575:cellular_component;GO:0005737:cytoplasm;	GO:0008270:zinc ion binding;GO:0016740:transferase activity;	K06058
ENSMUSG00000025085	152.047	3.42176	0.189962	18.0129	1.54e-72	6.54e-71	19	57032733	57314919	-	Ablim1	actin-binding LIM protein 1 [Source:MGI Symbol%3BAcc:MGI:1194500]	GO:0007010:cytoskeleton organization;GO:0007411:axon guidance;GO:0030032:lamellipodium assembly;GO:0045944:positive regulation of transcription from RNA polymerase II promoter;GO:0060271:cilium morphogenesis;	GO:0001725:stress fiber;GO:0005737:cytoplasm;GO:0014069:postsynaptic density;GO:0015629:actin cytoskeleton;GO:0030027:lamellipodium;	GO:0003779:actin binding;GO:0005515:protein binding;GO:0046872:metal ion binding;	K07520
ENSMUSG00000039671	1656.17	-0.937958	0.0520722	-18.0127	1.55e-72	6.55e-71	2	165784152	165899016	-	Zmynd8	zinc finger%2C MYND-type containing 8 [Source:MGI Symbol%3BAcc:MGI:1918025]	GO:0006355:regulation of transcription, DNA-templated;GO:0030336:negative regulation of cell migration;GO:0051491:positive regulation of filopodium assembly;GO:0060999:positive regulation of dendritic spine development;GO:1902897:regulation of postsynaptic density protein 95 clustering;GO:1902952:positive regulation of dendritic spine maintenance;GO:1903758:negative regulation of transcription fr…	GO:0005634:nucleus;GO:0005737:cytoplasm;GO:0043197:dendritic spine;GO:0043198:dendritic shaft;	GO:0000977:RNA polymerase II regulatory region sequence-specific DNA binding;GO:0003682:chromatin binding;GO:0003712:transcription cofactor activity;GO:0035064:methylated histone binding;GO:0042393:histone binding;GO:0046872:metal ion binding;GO:0047485:protein N-terminus binding;GO:0070577:lysine-acetylated histone binding;	K03125
ENSMUSG00000024805	527.104	1.49946	0.0832688	18.0075	1.7e-72	7.17e-71	19	36379067	36456192	+	Pcgf5	polycomb group ring finger 5 [Source:MGI Symbol%3BAcc:MGI:1923505]	GO:0006351:transcription, DNA-templated;GO:0045944:positive regulation of transcription from RNA polymerase II promoter;	GO:0005634:nucleus;GO:0005730:nucleolus;GO:0005813:centrosome;GO:0031519:PcG protein complex;	GO:0003674:molecular_function;GO:0046872:metal ion binding;	K11489
ENSMUSG00000025001	3251.99	0.878097	0.0487943	17.9959	2.1e-72	8.82e-71	19	38930915	38971051	+	Hells	helicase%2C lymphoid specific [Source:MGI Symbol%3BAcc:MGI:106209]	GO:0001655:urogenital system development;GO:0006306:DNA methylation;GO:0006342:chromatin silencing;GO:0006346:methylation-dependent chromatin silencing;GO:0006351:transcription, DNA-templated;GO:0007049:cell cycle;GO:0007275:multicellular organismal development;GO:0010216:maintenance of DNA methylation;GO:0030098:lymphocyte differentiation;GO:0031508:pericentric heterochromatin assembly;GO:004306…	GO:0000775:chromosome, centromeric region;GO:0005634:nucleus;GO:0005721:pericentric heterochromatin;	GO:0003682:chromatin binding;GO:0004386:helicase activity;GO:0005515:protein binding;GO:0005524:ATP binding;	-
ENSMUSG00000036006	126.787	5.09702	0.283441	17.9826	2.67e-72	1.12e-70	13	24582189	24733816	+	Fam65b	family with sequence similarity 65%2C member B [Source:MGI Symbol%3BAcc:MGI:2444879]	-	-	-	-
ENSMUSG00000001020	1224.78	1.21611	0.0676281	17.9823	2.68e-72	1.12e-70	3	90603771	90606045	+	S100a4	S100 calcium binding protein A4 [Source:MGI Symbol%3BAcc:MGI:1330282]	GO:0043123:positive regulation of I-kappaB kinase/NF-kappaB signaling;	GO:0005615:extracellular space;GO:0005634:nucleus;GO:0043005:neuron projection;GO:0048471:perinuclear region of cytoplasm;GO:0070062:extracellular exosome;	GO:0003723:RNA binding;GO:0003779:actin binding;GO:0005509:calcium ion binding;GO:0005515:protein binding;GO:0042802:identical protein binding;GO:0046914:transition metal ion binding;GO:0048306:calcium-dependent protein binding;GO:0050786:RAGE receptor binding;	-
ENSMUSG00000022265	2616.09	0.886599	0.049349	17.9659	3.6e-72	1.51e-70	15	27466677	27594909	+	Ank	progressive ankylosis [Source:MGI Symbol%3BAcc:MGI:3045421]	-	-	-	-
ENSMUSG00000025931	135.47	3.64119	0.202768	17.9575	4.2e-72	1.75e-70	1	20890606	20939650	+	Paqr8	progestin and adipoQ receptor family member VIII [Source:MGI Symbol%3BAcc:MGI:1921479]	GO:0007275:multicellular organismal development;GO:0043401:steroid hormone mediated signaling pathway;GO:0048477:oogenesis;GO:0048545:response to steroid hormone;	GO:0005794:Golgi apparatus;GO:0005886:plasma membrane;GO:0016021:integral component of membrane;	GO:0003707:steroid hormone receptor activity;GO:0005496:steroid binding;	-
ENSMUSG00000029778	124.85	5.08001	0.282933	17.9548	4.4e-72	1.83e-70	6	55451978	55501451	+	Adcyap1r1	adenylate cyclase activating polypeptide 1 receptor 1 [Source:MGI Symbol%3BAcc:MGI:108449]	GO:0007166:cell surface receptor signaling pathway;GO:0007186:G-protein coupled receptor signaling pathway;GO:0007202:activation of phospholipase C activity;GO:0007283:spermatogenesis;GO:0010524:positive regulation of calcium ion transport into cytosol;GO:0019933:cAMP-mediated signaling;GO:0030154:cell differentiation;GO:0030819:positive regulation of cAMP biosynthetic process;GO:0032355:response…	GO:0005768:endosome;GO:0005791:rough endoplasmic reticulum;GO:0005901:caveola;GO:0005923:bicellular tight junction;GO:0009986:cell surface;GO:0016021:integral component of membrane;GO:0043005:neuron projection;GO:0043235:receptor complex;	GO:0004930:G-protein coupled receptor activity;GO:0004999:vasoactive intestinal polypeptide receptor activity;GO:0005515:protein binding;GO:0008179:adenylate cyclase binding;GO:0030306:ADP-ribosylation factor binding;GO:0042923:neuropeptide binding;	K04587
ENSMUSG00000027894	145.708	-4.6063	0.256825	-17.9356	6.22e-72	2.58e-70	3	107467543	107518018	-	Slc6a17	solute carrier family 6 (neurotransmitter transporter)%2C member 17 [Source:MGI Symbol%3BAcc:MGI:2442535]	GO:0003333:amino acid transmembrane transport;GO:0006836:neurotransmitter transport;GO:0007420:brain development;GO:0015804:neutral amino acid transport;GO:0015816:glycine transport;GO:0015820:leucine transport;GO:0015824:proline transport;GO:0032328:alanine transport;	GO:0005887:integral component of plasma membrane;GO:0008021:synaptic vesicle;GO:0030054:cell junction;GO:0030672:synaptic vesicle membrane;	GO:0005328:neurotransmitter:sodium symporter activity;GO:0015171:amino acid transmembrane transporter activity;	K05048
ENSMUSG00000063077	1537.14	-0.960995	0.0535886	-17.9328	6.54e-72	2.71e-70	4	149176319	149307693	-	Kif1b	kinesin family member 1B [Source:MGI Symbol%3BAcc:MGI:108426]	GO:0007018:microtubule-based movement;GO:0007270:neuron-neuron synaptic transmission;GO:0007274:neuromuscular synaptic transmission;GO:0008089:anterograde axon cargo transport;GO:0009790:embryo development;GO:0010628:positive regulation of gene expression;GO:0030705:cytoskeleton-dependent intracellular transport;GO:0032418:lysosome localization;GO:0047497:mitochondrion transport along microtubule…	GO:0005739:mitochondrion;GO:0005871:kinesin complex;GO:0005874:microtubule;GO:0005875:microtubule associated complex;GO:0030659:cytoplasmic vesicle membrane;GO:0031410:cytoplasmic vesicle;GO:0043005:neuron projection;GO:1904115:axon cytoplasm;	GO:0003777:microtubule motor activity;GO:0005515:protein binding;GO:0005524:ATP binding;GO:0008017:microtubule binding;GO:0016887:ATPase activity;GO:0019900:kinase binding;GO:0097110:scaffold protein binding;	K10392
ENSMUSG00000022419	434.005	1.64494	0.0917778	17.9231	7.79e-72	3.22e-70	15	55112317	55259271	+	Deptor	DEP domain containing MTOR-interacting protein [Source:MGI Symbol%3BAcc:MGI:2146322]	GO:0006469:negative regulation of protein kinase activity;GO:0032007:negative regulation of TOR signaling;GO:0035556:intracellular signal transduction;GO:0045792:negative regulation of cell size;GO:2001236:regulation of extrinsic apoptotic signaling pathway;	GO:0005622:intracellular;GO:0005737:cytoplasm;	-	K20402
ENSMUSG00000049881	513.639	1.4888	0.0831104	17.9136	9.24e-72	3.81e-70	1	157412352	157420236	+	2810025M15Rik	RIKEN cDNA 2810025M15 gene [Source:MGI Symbol%3BAcc:MGI:1917203]	-	-	-	-
ENSMUSG00000041556	149.706	-3.97692	0.222312	-17.8889	1.44e-71	5.92e-70	4	148160621	148166424	+	Fbxo2	F-box protein 2 [Source:MGI Symbol%3BAcc:MGI:2446216]	GO:0006511:ubiquitin-dependent protein catabolic process;GO:0006516:glycoprotein catabolic process;GO:0008285:negative regulation of cell proliferation;GO:0016567:protein ubiquitination;GO:0030433:ER-associated ubiquitin-dependent protein catabolic process;GO:0031146:SCF-dependent proteasomal ubiquitin-dependent protein catabolic process;GO:0031396:regulation of protein ubiquitination;	GO:0005737:cytoplasm;GO:0005783:endoplasmic reticulum;GO:0005829:cytosol;GO:0019005:SCF ubiquitin ligase complex;GO:0031090:organelle membrane;GO:0043197:dendritic spine;GO:0070062:extracellular exosome;	GO:0001540:beta-amyloid binding;GO:0001948:glycoprotein binding;GO:0004842:ubiquitin-protein transferase activity;GO:0005515:protein binding;GO:0030246:carbohydrate binding;	K10099
ENSMUSG00000027540	1105.8	-1.13687	0.0635834	-17.8799	1.69e-71	6.94e-70	2	167932057	167979385	+	Ptpn1	protein tyrosine phosphatase%2C non-receptor type 1 [Source:MGI Symbol%3BAcc:MGI:97805]	GO:0006470:protein dephosphorylation;GO:0007257:activation of JUN kinase activity;GO:0008286:insulin receptor signaling pathway;GO:0009966:regulation of signal transduction;GO:0030100:regulation of endocytosis;GO:0030948:negative regulation of vascular endothelial growth factor receptor signaling pathway;GO:0030968:endoplasmic reticulum unfolded protein response;GO:0031532:actin cytoskeleton reor…	GO:0005737:cytoplasm;GO:0005769:early endosome;GO:0005783:endoplasmic reticulum;GO:0005829:cytosol;GO:0005886:plasma membrane;GO:0097443:sorting endosome;GO:0098554:cytoplasmic side of endoplasmic reticulum membrane;	GO:0003723:RNA binding;GO:0004725:protein tyrosine phosphatase activity;GO:0005158:insulin receptor binding;GO:0008270:zinc ion binding;GO:0019899:enzyme binding;GO:0019901:protein kinase binding;GO:0030971:receptor tyrosine kinase binding;GO:0045296:cadherin binding;GO:0046875:ephrin receptor binding;GO:0051721:protein phosphatase 2A binding;	K05696
ENSMUSG00000038497	914.859	-1.17097	0.0655217	-17.8715	1.97e-71	8.05e-70	8	13288190	13322924	+	Tmco3	transmembrane and coiled-coil domains 3 [Source:MGI Symbol%3BAcc:MGI:2444946]	GO:0008150:biological_process;GO:1902600:hydrogen ion transmembrane transport;	GO:0016020:membrane;GO:0016021:integral component of membrane;	GO:0015299:solute:proton antiporter activity;GO:0022890:inorganic cation transmembrane transporter activity;	-
ENSMUSG00000027611	532.366	-1.50173	0.0840446	-17.8683	2.08e-71	8.52e-70	2	155751117	155755471	+	Procr	protein C receptor%2C endothelial [Source:MGI Symbol%3BAcc:MGI:104596]	GO:0007596:blood coagulation;GO:0050819:negative regulation of coagulation;	GO:0005813:centrosome;GO:0005925:focal adhesion;GO:0009986:cell surface;GO:0016021:integral component of membrane;GO:0070062:extracellular exosome;	GO:0004872:receptor activity;GO:0008022:protein C-terminus binding;	-
ENSMUSG00000036246	701.836	-1.43856	0.0805389	-17.8616	2.35e-71	9.57e-70	8	69808679	69821870	+	Gmip	Gem-interacting protein [Source:MGI Symbol%3BAcc:MGI:1926066]	GO:0034260:negative regulation of GTPase activity;GO:0035556:intracellular signal transduction;GO:0043547:positive regulation of GTPase activity;	GO:0005654:nucleoplasm;GO:0005829:cytosol;GO:0005886:plasma membrane;	GO:0005096:GTPase activator activity;GO:0046872:metal ion binding;	K20653
ENSMUSG00000046707	3552.94	-0.748007	0.0419317	-17.8387	3.54e-71	1.44e-69	8	95446096	95490039	-	Csnk2a2	casein kinase 2%2C alpha prime polypeptide [Source:MGI Symbol%3BAcc:MGI:88547]	GO:0006351:transcription, DNA-templated;GO:0006355:regulation of transcription, DNA-templated;GO:0006468:protein phosphorylation;GO:0006915:apoptotic process;GO:0007283:spermatogenesis;GO:0016055:Wnt signaling pathway;GO:0021987:cerebral cortex development;GO:0051726:regulation of cell cycle;GO:0071174:mitotic spindle checkpoint;GO:0097421:liver regeneration;GO:1903146:regulation of mitochondrion…	GO:0000785:chromatin;GO:0001669:acrosomal vesicle;GO:0005634:nucleus;GO:0005886:plasma membrane;GO:0005956:protein kinase CK2 complex;GO:0031519:PcG protein complex;	GO:0004674:protein serine/threonine kinase activity;GO:0005515:protein binding;GO:0005524:ATP binding;GO:0047485:protein N-terminus binding;	K03097
ENSMUSG00000057329	442.764	1.8509	0.103761	17.838	3.58e-71	1.45e-69	1	106538178	106714274	-	Bcl2	B cell leukemia/lymphoma 2 [Source:MGI Symbol%3BAcc:MGI:88138]	GO:0000209:protein polyubiquitination;GO:0000902:cell morphogenesis;GO:0001503:ossification;GO:0001541:ovarian follicle development;GO:0001656:metanephros development;GO:0001657:ureteric bud development;GO:0001658:branching involved in ureteric bud morphogenesis;GO:0001662:behavioral fear response;GO:0001776:leukocyte homeostasis;GO:0001782:B cell homeostasis;GO:0001822:kidney development;GO:0001…	GO:0005622:intracellular;GO:0005634:nucleus;GO:0005654:nucleoplasm;GO:0005737:cytoplasm;GO:0005739:mitochondrion;GO:0005741:mitochondrial outer membrane;GO:0005783:endoplasmic reticulum;GO:0005789:endoplasmic reticulum membrane;GO:0005829:cytosol;GO:0016020:membrane;GO:0031965:nuclear membrane;GO:0031966:mitochondrial membrane;GO:0043209:myelin sheath;GO:0043234:protein complex;GO:0046930:pore co…	GO:0002020:protease binding;GO:0005515:protein binding;GO:0008134:transcription factor binding;GO:0015267:channel activity;GO:0016248:channel inhibitor activity;GO:0019903:protein phosphatase binding;GO:0031625:ubiquitin protein ligase binding;GO:0042802:identical protein binding;GO:0042803:protein homodimerization activity;GO:0043565:sequence-specific DNA binding;GO:0046982:protein heterodimeriz…	K02161
ENSMUSG00000071644	17743.2	0.714077	0.0400491	17.83	4.13e-71	1.67e-69	19	8967041	8978479	+	Eef1g	eukaryotic translation elongation factor 1 gamma [Source:MGI Symbol%3BAcc:MGI:1914410]	GO:0006414:translational elongation;GO:0006749:glutathione metabolic process;GO:0009615:response to virus;	GO:0005634:nucleus;GO:0005737:cytoplasm;GO:0005783:endoplasmic reticulum;GO:0016020:membrane;GO:0070062:extracellular exosome;	GO:0003746:translation elongation factor activity;GO:0004364:glutathione transferase activity;GO:0045296:cadherin binding;	K03233
ENSMUSG00000040118	1091.08	-1.1094	0.0622548	-17.8204	4.91e-71	1.99e-69	5	15934691	16374511	+	Cacna2d1	calcium channel%2C voltage-dependent%2C alpha2/delta subunit 1 [Source:MGI Symbol%3BAcc:MGI:88295]	GO:0006816:calcium ion transport;GO:0051924:regulation of calcium ion transport;GO:0060307:regulation of ventricular cardiac muscle cell membrane repolarization;GO:0060402:calcium ion transport into cytosol;GO:0061577:generation of L-type calcium current;GO:0070588:calcium ion transmembrane transport;GO:0086002:cardiac muscle cell action potential involved in contraction;GO:0086048:membrane depol…	GO:0005891:voltage-gated calcium channel complex;GO:0016529:sarcoplasmic reticulum;GO:0030315:T-tubule;GO:0070062:extracellular exosome;GO:1990454:L-type voltage-gated calcium channel complex;	GO:0005245:voltage-gated calcium channel activity;GO:0005515:protein binding;GO:0046872:metal ion binding;GO:0086057:voltage-gated calcium channel activity involved in bundle of His cell action potential;	K04858
ENSMUSG00000031885	4634.55	-0.706003	0.0396192	-17.8197	4.97e-71	2.01e-69	8	105170674	105217989	+	Cbfb	core binding factor beta [Source:MGI Symbol%3BAcc:MGI:99851]	GO:0000209:protein polyubiquitination;GO:0001503:ossification;GO:0001649:osteoblast differentiation;GO:0030098:lymphocyte differentiation;GO:0030099:myeloid cell differentiation;GO:0045944:positive regulation of transcription from RNA polymerase II promoter;GO:0048469:cell maturation;GO:0060216:definitive hemopoiesis;	GO:0005634:nucleus;GO:0005654:nucleoplasm;GO:0016020:membrane;GO:0043234:protein complex;	GO:0003677:DNA binding;GO:0003713:transcription coactivator activity;GO:0005515:protein binding;	-
ENSMUSG00000075394	367.736	1.80018	0.101026	17.8189	5.04e-71	2.03e-69	15	103018934	103036852	+	Hoxc4	homeobox C4 [Source:MGI Symbol%3BAcc:MGI:96195]	GO:0001501:skeletal system development;GO:0006366:transcription from RNA polymerase II promoter;GO:0009952:anterior/posterior pattern specification;GO:0045944:positive regulation of transcription from RNA polymerase II promoter;GO:0048562:embryonic organ morphogenesis;GO:0051216:cartilage development;	GO:0005634:nucleus;GO:0005654:nucleoplasm;	GO:0000980:RNA polymerase II distal enhancer sequence-specific DNA binding;GO:0001205:RNA polymerase II distal enhancer sequence-specific DNA binding transcription factor activity involved in positive regulation of transcription;GO:0071837:HMG box domain binding;	K09304
ENSMUSG00000026475	1453.36	-1.07237	0.0602179	-17.8082	6.11e-71	2.45e-69	1	153740349	153745468	+	Rgs16	regulator of G-protein signaling 16 [Source:MGI Symbol%3BAcc:MGI:108407]	GO:0007186:G-protein coupled receptor signaling pathway;GO:0009968:negative regulation of signal transduction;GO:0043547:positive regulation of GTPase activity;	GO:0005737:cytoplasm;GO:0005886:plasma membrane;GO:0031224:intrinsic component of membrane;	GO:0005096:GTPase activator activity;	K16449
ENSMUSG00000034220	2810.89	0.931953	0.0523499	17.8024	6.77e-71	2.72e-69	1	92831645	92860779	+	Gpc1	glypican 1 [Source:MGI Symbol%3BAcc:MGI:1194891]	GO:0006024:glycosaminoglycan biosynthetic process;GO:0014037:Schwann cell differentiation;GO:0030200:heparan sulfate proteoglycan catabolic process;GO:0032288:myelin assembly;GO:0040037:negative regulation of fibroblast growth factor receptor signaling pathway;GO:2001016:positive regulation of skeletal muscle cell differentiation;	GO:0005578:proteinaceous extracellular matrix;GO:0005654:nucleoplasm;GO:0005768:endosome;GO:0005796:Golgi lumen;GO:0005829:cytosol;GO:0005886:plasma membrane;GO:0031225:anchored component of membrane;GO:0045121:membrane raft;GO:0070062:extracellular exosome;	GO:0005507:copper ion binding;GO:0017134:fibroblast growth factor binding;GO:0043236:laminin binding;GO:0043395:heparan sulfate proteoglycan binding;	K08107
ENSMUSG00000046223	2592.58	0.969321	0.054462	17.7981	7.31e-71	2.93e-69	7	24462484	24475968	+	Plaur	plasminogen activator%2C urokinase receptor [Source:MGI Symbol%3BAcc:MGI:97612]	GO:0001934:positive regulation of protein phosphorylation;GO:0038195:urokinase plasminogen activator signaling pathway;GO:0043066:negative regulation of apoptotic process;GO:0043388:positive regulation of DNA binding;GO:0045742:positive regulation of epidermal growth factor receptor signaling pathway;GO:0090200:positive regulation of release of cytochrome c from mitochondria;GO:2001243:negative r…	GO:0005886:plasma membrane;GO:0005887:integral component of plasma membrane;GO:0005925:focal adhesion;GO:0009986:cell surface;GO:0031225:anchored component of membrane;GO:0070062:extracellular exosome;	GO:0005102:receptor binding;GO:0005515:protein binding;GO:0019899:enzyme binding;GO:0019904:protein domain specific binding;GO:0030377:urokinase plasminogen activator receptor activity;	-
ENSMUSG00000056153	1815.66	0.970399	0.054574	17.7814	9.86e-71	3.94e-69	18	88665224	88927481	-	Socs6	suppressor of cytokine signaling 6 [Source:MGI Symbol%3BAcc:MGI:1924885]	GO:0001678:cellular glucose homeostasis;GO:0006469:negative regulation of protein kinase activity;GO:0010498:proteasomal protein catabolic process;GO:0016567:protein ubiquitination;GO:0019221:cytokine-mediated signaling pathway;GO:0035556:intracellular signal transduction;GO:0040008:regulation of growth;GO:0046426:negative regulation of JAK-STAT cascade;GO:0050868:negative regulation of T cell ac…	GO:0001772:immunological synapse;GO:0005737:cytoplasm;GO:0005829:cytosol;	GO:0004860:protein kinase inhibitor activity;GO:0005515:protein binding;	K04699
ENSMUSG00000038402	236.924	2.34929	0.132376	17.7471	1.81e-70	7.23e-69	13	31625816	31631403	+	Foxf2	forkhead box F2 [Source:MGI Symbol%3BAcc:MGI:1347479]	GO:0006366:transcription from RNA polymerase II promoter;GO:0030154:cell differentiation;GO:0030198:extracellular matrix organization;GO:0042249:establishment of planar polarity of embryonic epithelium;GO:0045892:negative regulation of transcription, DNA-templated;GO:0045893:positive regulation of transcription, DNA-templated;GO:0045944:positive regulation of transcription from RNA polymerase II …	GO:0005634:nucleus;GO:0005667:transcription factor complex;	GO:0000977:RNA polymerase II regulatory region sequence-specific DNA binding;GO:0001228:RNA polymerase II transcription regulatory region sequence-specific DNA binding transcription factor activity involved in positive regulation of transcription;GO:0003677:DNA binding;GO:0003700:sequence-specific DNA binding transcription factor activity;GO:0003705:RNA polymerase II distal enhancer sequence-spec…	K09399
ENSMUSG00000026305	4296.08	0.781989	0.0441022	17.7313	2.4e-70	9.56e-69	1	90998737	91128944	+	Lrrfip1	leucine rich repeat (in FLII) interacting protein 1 [Source:MGI Symbol%3BAcc:MGI:1342770]	GO:0000122:negative regulation of transcription from RNA polymerase II promoter;GO:0006351:transcription, DNA-templated;GO:0051092:positive regulation of NF-kappaB transcription factor activity;	GO:0005634:nucleus;GO:0005829:cytosol;GO:0005886:plasma membrane;	GO:0000978:RNA polymerase II core promoter proximal region sequence-specific DNA binding;GO:0001078:RNA polymerase II core promoter proximal region sequence-specific DNA binding transcription factor activity involved in negative regulation of transcription;GO:0003677:DNA binding;GO:0005515:protein binding;GO:0042803:protein homodimerization activity;GO:0045296:cadherin binding;	-
ENSMUSG00000005897	270.042	2.08567	0.117684	17.7226	2.81e-70	1.11e-68	10	94148023	94197211	+	Nr2c1	nuclear receptor subfamily 2%2C group C%2C member 1 [Source:MGI Symbol%3BAcc:MGI:1352465]	GO:0000122:negative regulation of transcription from RNA polymerase II promoter;GO:0006351:transcription, DNA-templated;GO:0043401:steroid hormone mediated signaling pathway;GO:0045892:negative regulation of transcription, DNA-templated;GO:0048386:positive regulation of retinoic acid receptor signaling pathway;	GO:0005634:nucleus;GO:0016605:PML body;	GO:0000978:RNA polymerase II core promoter proximal region sequence-specific DNA binding;GO:0001078:RNA polymerase II core promoter proximal region sequence-specific DNA binding transcription factor activity involved in negative regulation of transcription;GO:0003677:DNA binding;GO:0003707:steroid hormone receptor activity;GO:0005515:protein binding;GO:0008270:zinc ion binding;GO:0042803:protein …	K08543
ENSMUSG00000040596	132.208	3.52083	0.198719	17.7177	3.06e-70	1.21e-68	1	166384622	166409863	-	Pogk	pogo transposable element with KRAB domain [Source:MGI Symbol%3BAcc:MGI:1918842]	GO:0006355:regulation of transcription, DNA-templated;GO:0007275:multicellular organismal development;GO:0008150:biological_process;	GO:0005575:cellular_component;GO:0005634:nucleus;	GO:0003677:DNA binding;	-
ENSMUSG00000036377	297.997	2.15937	0.122063	17.6907	4.95e-70	1.95e-68	5	76656512	76873554	+	C530008M17Rik	RIKEN cDNA C530008M17 gene [Source:MGI Symbol%3BAcc:MGI:2444817]	-	-	-	-
ENSMUSG00000066036	1962.9	-1.1414	0.0645385	-17.6855	5.42e-70	2.14e-68	4	139352609	139489588	+	Ubr4	ubiquitin protein ligase E3 component n-recognin 4 [Source:MGI Symbol%3BAcc:MGI:1916366]	GO:0042787:protein ubiquitination involved in ubiquitin-dependent protein catabolic process;	GO:0005654:nucleoplasm;GO:0005813:centrosome;GO:0005829:cytosol;GO:0016020:membrane;GO:0016021:integral component of membrane;	GO:0004842:ubiquitin-protein transferase activity;GO:0005515:protein binding;GO:0005516:calmodulin binding;GO:0008270:zinc ion binding;	K10691
ENSMUSG00000023367	1614.18	-0.938996	0.0531117	-17.6796	6.02e-70	2.37e-68	6	48840919	48847071	+	Tmem176a	transmembrane protein 176A [Source:MGI Symbol%3BAcc:MGI:1913308]	GO:2001199:negative regulation of dendritic cell differentiation;	GO:0016021:integral component of membrane;	GO:0005515:protein binding;	-
ENSMUSG00000035158	364.546	-1.85034	0.104714	-17.6704	7.09e-70	2.79e-68	6	97807052	98021349	+	Mitf	microphthalmia-associated transcription factor [Source:MGI Symbol%3BAcc:MGI:104554]	GO:0000122:negative regulation of transcription from RNA polymerase II promoter;GO:0006355:regulation of transcription, DNA-templated;GO:0006357:regulation of transcription from RNA polymerase II promoter;GO:0006366:transcription from RNA polymerase II promoter;GO:0006461:protein complex assembly;GO:0010468:regulation of gene expression;GO:0010628:positive regulation of gene expression;GO:0016055…	GO:0005634:nucleus;GO:0043234:protein complex;	GO:0000978:RNA polymerase II core promoter proximal region sequence-specific DNA binding;GO:0000979:RNA polymerase II core promoter sequence-specific DNA binding;GO:0000981:sequence-specific DNA binding RNA polymerase II transcription factor activity;GO:0001077:RNA polymerase II core promoter proximal region sequence-specific DNA binding transcription factor activity involved in positive regulati…	K09455
ENSMUSG00000020407	242.366	-2.29374	0.129815	-17.6693	7.23e-70	2.84e-68	11	9118103	9136170	+	Upp1	uridine phosphorylase 1 [Source:MGI Symbol%3BAcc:MGI:1097668]	GO:0006218:uridine catabolic process;GO:0006220:pyrimidine nucleotide metabolic process;GO:0009166:nucleotide catabolic process;GO:0042149:cellular response to glucose starvation;GO:0044206:UMP salvage;GO:0046108:uridine metabolic process;	GO:0005737:cytoplasm;	GO:0004850:uridine phosphorylase activity;	K00757
ENSMUSG00000028207	1619.3	-0.980158	0.0554835	-17.6658	7.7e-70	3.01e-68	4	9448069	9669344	-	Asph	aspartate-beta-hydroxylase [Source:MGI Symbol%3BAcc:MGI:1914186]	GO:0007389:pattern specification process;GO:0008285:negative regulation of cell proliferation;GO:0010524:positive regulation of calcium ion transport into cytosol;GO:0031585:regulation of inositol 1,4,5-trisphosphate-sensitive calcium-release channel activity;GO:0031647:regulation of protein stability;GO:0032237:activation of store-operated calcium channel activity;GO:0033198:response to ATP;GO:0…	GO:0005737:cytoplasm;GO:0005783:endoplasmic reticulum;GO:0005886:plasma membrane;GO:0016021:integral component of membrane;GO:0030176:integral component of endoplasmic reticulum membrane;GO:0032541:cortical endoplasmic reticulum;GO:0033017:sarcoplasmic reticulum membrane;	GO:0004597:peptide-aspartate beta-dioxygenase activity;GO:0005509:calcium ion binding;GO:0005515:protein binding;	K00476
ENSMUSG00000086427	145.171	-5.3846	0.304915	-17.6593	8.62e-70	3.37e-68	6	52244393	52249799	+	Hoxa11os	homeobox A11%2C opposite strand [Source:MGI Symbol%3BAcc:MGI:107208]	-	-	-	-
ENSMUSG00000028944	214.553	2.34852	0.133356	17.6109	2.03e-69	7.91e-68	5	24862744	25100642	-	Prkag2	protein kinase%2C AMP-activated%2C gamma 2 non-catalytic subunit [Source:MGI Symbol%3BAcc:MGI:1336153]	GO:0005977:glycogen metabolic process;GO:0006110:regulation of glycolytic process;GO:0006468:protein phosphorylation;GO:0006469:negative regulation of protein kinase activity;GO:0006633:fatty acid biosynthetic process;GO:0007005:mitochondrion organization;GO:0010800:positive regulation of peptidyl-threonine phosphorylation;GO:0019217:regulation of fatty acid metabolic process;GO:0032147:activatio…	GO:0005615:extracellular space;GO:0005654:nucleoplasm;GO:0005829:cytosol;GO:0031588:AMP-activated protein kinase complex;	GO:0004679:AMP-activated protein kinase activity;GO:0004862:cAMP-dependent protein kinase inhibitor activity;GO:0005524:ATP binding;GO:0008603:cAMP-dependent protein kinase regulator activity;GO:0008607:phosphorylase kinase regulator activity;GO:0016208:AMP binding;GO:0019901:protein kinase binding;GO:0030295:protein kinase activator activity;GO:0043531:ADP binding;	K07200
ENSMUSG00000028557	3729.03	-0.877469	0.0498288	-17.6097	2.08e-69	8.07e-68	4	109451098	109484728	-	Rnf11	ring finger protein 11 [Source:MGI Symbol%3BAcc:MGI:1352759]	GO:0006511:ubiquitin-dependent protein catabolic process;GO:0042787:protein ubiquitination involved in ubiquitin-dependent protein catabolic process;GO:0043161:proteasome-mediated ubiquitin-dependent protein catabolic process;GO:0051865:protein autoubiquitination;	GO:0000151:ubiquitin ligase complex;GO:0005634:nucleus;GO:0005769:early endosome;GO:0055037:recycling endosome;GO:0070062:extracellular exosome;	GO:0004842:ubiquitin-protein transferase activity;GO:0005515:protein binding;GO:0046872:metal ion binding;GO:0061630:ubiquitin protein ligase activity;	K11980
ENSMUSG00000019961	5707.83	0.776064	0.0441003	17.5977	2.57e-69	9.96e-68	10	91147571	91181315	-	Tmpo	thymopoietin [Source:MGI Symbol%3BAcc:MGI:106920]	GO:0006355:regulation of transcription, DNA-templated;	GO:0000785:chromatin;GO:0005634:nucleus;GO:0005635:nuclear envelope;GO:0016020:membrane;GO:0031965:nuclear membrane;	GO:0003677:DNA binding;GO:0005515:protein binding;GO:0045296:cadherin binding;	-
ENSMUSG00000026576	367.684	1.82369	0.103633	17.5975	2.57e-69	9.97e-68	1	164437109	164458355	-	Atp1b1	ATPase%2C Na+/K+ transporting%2C beta 1 polypeptide [Source:MGI Symbol%3BAcc:MGI:88108]	GO:0001666:response to hypoxia;GO:0006874:cellular calcium ion homeostasis;GO:0006883:cellular sodium ion homeostasis;GO:0007155:cell adhesion;GO:0010107:potassium ion import;GO:0010248:establishment or maintenance of transmembrane electrochemical gradient;GO:0010468:regulation of gene expression;GO:0010882:regulation of cardiac muscle contraction by calcium ion signaling;GO:0030007:cellular pota…	GO:0005622:intracellular;GO:0005886:plasma membrane;GO:0005890:sodium:potassium-exchanging ATPase complex;GO:0005901:caveola;GO:0014704:intercalated disc;GO:0016020:membrane;GO:0016323:basolateral plasma membrane;GO:0016324:apical plasma membrane;GO:0042383:sarcolemma;GO:0043209:myelin sheath;GO:0070062:extracellular exosome;GO:1903561:extracellular vesicle;	GO:0001671:ATPase activator activity;GO:0005391:sodium:potassium-exchanging ATPase activity;GO:0005515:protein binding;GO:0005524:ATP binding;GO:0008022:protein C-terminus binding;GO:0008144:drug binding;GO:0016887:ATPase activity;GO:0019901:protein kinase binding;GO:0023026:MHC class II protein complex binding;GO:0030955:potassium ion binding;GO:0031402:sodium ion binding;GO:0051117:ATPase bindi…	-
ENSMUSG00000018326	5725.33	-0.755143	0.0429193	-17.5945	2.72e-69	1.05e-67	2	163994960	164018588	+	Ywhab	tyrosine 3-monooxygenase/tryptophan 5-monooxygenase activation protein%2C beta polypeptide [Source:MGI Symbol%3BAcc:MGI:1891917]	GO:0006605:protein targeting;GO:0035308:negative regulation of protein dephosphorylation;GO:0043085:positive regulation of catalytic activity;GO:0045744:negative regulation of G-protein coupled receptor protein signaling pathway;GO:0045892:negative regulation of transcription, DNA-templated;GO:0051220:cytoplasmic sequestering of protein;GO:0051291:protein heterooligomerization;	GO:0005634:nucleus;GO:0005737:cytoplasm;GO:0005829:cytosol;GO:0005925:focal adhesion;GO:0016020:membrane;GO:0017053:transcriptional repressor complex;GO:0030659:cytoplasmic vesicle membrane;GO:0042470:melanosome;GO:0043234:protein complex;GO:0048471:perinuclear region of cytoplasm;GO:0070062:extracellular exosome;	GO:0003714:transcription corepressor activity;GO:0005515:protein binding;GO:0008022:protein C-terminus binding;GO:0019899:enzyme binding;GO:0019904:protein domain specific binding;GO:0032403:protein complex binding;GO:0042826:histone deacetylase binding;GO:0045296:cadherin binding;GO:0050815:phosphoserine binding;GO:0051219:phosphoprotein binding;	K16197
ENSMUSG00000022485	343.229	1.84091	0.104667	17.5883	3.03e-69	1.17e-67	15	102967443	103017429	+	Hoxc5	homeobox C5 [Source:MGI Symbol%3BAcc:MGI:96196]	GO:0006351:transcription, DNA-templated;GO:0006355:regulation of transcription, DNA-templated;GO:0009952:anterior/posterior pattern specification;GO:0048706:embryonic skeletal system development;	GO:0005654:nucleoplasm;GO:0030054:cell junction;	GO:0003700:sequence-specific DNA binding transcription factor activity;GO:0043565:sequence-specific DNA binding;	K09305
ENSMUSG00000033943	1545.61	-1.02763	0.0584974	-17.5671	4.4e-69	1.69e-67	2	119897228	119969581	+	Mga	MAX gene associated [Source:MGI Symbol%3BAcc:MGI:1352483]	GO:0006366:transcription from RNA polymerase II promoter;GO:0045944:positive regulation of transcription from RNA polymerase II promoter;	GO:0005667:transcription factor complex;GO:0071339:MLL1 complex;	GO:0000977:RNA polymerase II regulatory region sequence-specific DNA binding;GO:0001228:RNA polymerase II transcription regulatory region sequence-specific DNA binding transcription factor activity involved in positive regulation of transcription;GO:0003700:sequence-specific DNA binding transcription factor activity;GO:0046983:protein dimerization activity;	-
ENSMUSG00000034088	7720.52	-0.812568	0.0462591	-17.5656	4.52e-69	1.74e-67	1	93405940	93478815	-	Hdlbp	high density lipoprotein (HDL) binding protein [Source:MGI Symbol%3BAcc:MGI:99256]	GO:0006869:lipid transport;GO:0008203:cholesterol metabolic process;	GO:0005634:nucleus;GO:0005829:cytosol;GO:0034364:high-density lipoprotein particle;	GO:0003723:RNA binding;GO:0045296:cadherin binding;	-
ENSMUSG00000035283	138.875	-4.48751	0.255589	-17.5575	5.21e-69	2e-67	19	56722372	56724862	+	Adrb1	adrenergic receptor%2C beta 1 [Source:MGI Symbol%3BAcc:MGI:87937]	GO:0001996:positive regulation of heart rate by epinephrine-norepinephrine;GO:0001997:positive regulation of the force of heart contraction by epinephrine-norepinephrine;GO:0002024:diet induced thermogenesis;GO:0002025:vasodilation by norepinephrine-epinephrine involved in regulation of systemic arterial blood pressure;GO:0007189:adenylate cyclase-activating G-protein coupled receptor signaling p…	GO:0005769:early endosome;GO:0005886:plasma membrane;GO:0005887:integral component of plasma membrane;GO:0016020:membrane;	GO:0004940:beta1-adrenergic receptor activity;GO:0005057:receptor signaling protein activity;GO:0005088:Ras guanyl-nucleotide exchange factor activity;GO:0005515:protein binding;GO:0030165:PDZ domain binding;GO:0031694:alpha-2A adrenergic receptor binding;GO:0046982:protein heterodimerization activity;GO:0051379:epinephrine binding;GO:0051380:norepinephrine binding;	K04141
ENSMUSG00000020108	3268.45	0.906789	0.0517287	17.5297	8.5e-69	3.25e-67	10	59949669	59951834	-	Ddit4	DNA-damage-inducible transcript 4 [Source:MGI Symbol%3BAcc:MGI:1921997]	GO:0001666:response to hypoxia;GO:0001764:neuron migration;GO:0007420:brain development;GO:0008283:cell proliferation;GO:0010801:negative regulation of peptidyl-threonine phosphorylation;GO:0030182:neuron differentiation;GO:0032007:negative regulation of TOR signaling;GO:0033137:negative regulation of peptidyl-serine phosphorylation;GO:0042771:intrinsic apoptotic signaling pathway in response to …	GO:0005622:intracellular;GO:0005737:cytoplasm;GO:0005739:mitochondrion;GO:0005829:cytosol;	GO:0071889:14-3-3 protein binding;	K08270
ENSMUSG00000027750	1013.85	4.22655	0.241291	17.5164	1.07e-68	4.1e-67	3	54361109	54391037	+	Postn	periostin%2C osteoblast specific factor [Source:MGI Symbol%3BAcc:MGI:1926321]	GO:0001666:response to hypoxia;GO:0001953:negative regulation of cell-matrix adhesion;GO:0003073:regulation of systemic arterial blood pressure;GO:0007155:cell adhesion;GO:0008593:regulation of Notch signaling pathway;GO:0009612:response to mechanical stimulus;GO:0009888:tissue development;GO:0014850:response to muscle activity;GO:0014911:positive regulation of smooth muscle cell migration;GO:003…	GO:0005578:proteinaceous extracellular matrix;GO:0005615:extracellular space;GO:0005802:trans-Golgi network;GO:0031012:extracellular matrix;GO:0031594:neuromuscular junction;	GO:0008201:heparin binding;GO:0046872:metal ion binding;	-
ENSMUSG00000017478	2525.6	-0.966317	0.0552104	-17.5025	1.37e-68	5.23e-67	8	122376609	122417360	+	Zc3h18	zinc finger CCCH-type containing 18 [Source:MGI Symbol%3BAcc:MGI:1923264]	GO:0008150:biological_process;	GO:0016607:nuclear speck;GO:0043234:protein complex;	GO:0003723:RNA binding;GO:0046872:metal ion binding;	K13092
ENSMUSG00000052914	117.495	5.16948	0.295398	17.5001	1.43e-68	5.44e-67	4	96516138	96553661	-	Cyp2j6	cytochrome P450%2C family 2%2C subfamily j%2C polypeptide 6 [Source:MGI Symbol%3BAcc:MGI:1270148]	GO:0001523:retinoid metabolic process;GO:0007565:female pregnancy;GO:0014070:response to organic cyclic compound;GO:0019373:epoxygenase P450 pathway;GO:0032966:negative regulation of collagen biosynthetic process;GO:0035359:negative regulation of peroxisome proliferator activated receptor signaling pathway;GO:0043651:linoleic acid metabolic process;GO:0055114:oxidation-reduction process;	GO:0005783:endoplasmic reticulum;GO:0005789:endoplasmic reticulum membrane;GO:0031090:organelle membrane;GO:0070062:extracellular exosome;	GO:0003958:NADPH-hemoprotein reductase activity;GO:0005506:iron ion binding;GO:0008392:arachidonic acid epoxygenase activity;GO:0008404:arachidonic acid 14,15-epoxygenase activity;GO:0008405:arachidonic acid 11,12-epoxygenase activity;GO:0020037:heme binding;GO:0070330:aromatase activity;GO:0071614:linoleic acid epoxygenase activity;	K07418
ENSMUSG00000024431	2075.68	0.914777	0.0522784	17.4982	1.48e-68	5.62e-67	18	39410545	39491301	-	Nr3c1	nuclear receptor subfamily 3%2C group C%2C member 1 [Source:MGI Symbol%3BAcc:MGI:95824]	GO:0000122:negative regulation of transcription from RNA polymerase II promoter;GO:0006111:regulation of gluconeogenesis;GO:0006351:transcription, DNA-templated;GO:0006355:regulation of transcription, DNA-templated;GO:0006366:transcription from RNA polymerase II promoter;GO:0008211:glucocorticoid metabolic process;GO:0016569:covalent chromatin modification;GO:0030325:adrenal gland development;GO:…	GO:0005622:intracellular;GO:0005634:nucleus;GO:0005654:nucleoplasm;GO:0005737:cytoplasm;GO:0005739:mitochondrion;GO:0005815:microtubule organizing center;GO:0005819:spindle;GO:0005829:cytosol;GO:0016020:membrane;GO:0043234:protein complex;	GO:0000978:RNA polymerase II core promoter proximal region sequence-specific DNA binding;GO:0001047:core promoter binding;GO:0001077:RNA polymerase II core promoter proximal region sequence-specific DNA binding transcription factor activity involved in positive regulation of transcription;GO:0003677:DNA binding;GO:0003700:sequence-specific DNA binding transcription factor activity;GO:0004883:gluc…	K05771
ENSMUSG00000046687	191.433	-2.77525	0.158656	-17.4922	1.64e-68	6.22e-67	10	62071123	62072362	+	Gm5424	predicted gene 5424 [Source:MGI Symbol%3BAcc:MGI:3643173]	-	-	-	K01940
ENSMUSG00000032369	2653.83	-0.913742	0.0522796	-17.478	2.11e-68	7.97e-67	9	92249750	92272278	+	Plscr1	phospholipid scramblase 1 [Source:MGI Symbol%3BAcc:MGI:893575]	GO:0006366:transcription from RNA polymerase II promoter;GO:0006659:phosphatidylserine biosynthetic process;GO:0006915:apoptotic process;GO:0006953:acute-phase response;GO:0010628:positive regulation of gene expression;GO:0017121:phospholipid scrambling;GO:0030099:myeloid cell differentiation;GO:0032091:negative regulation of protein binding;GO:0033003:regulation of mast cell activation;GO:003545…	GO:0005634:nucleus;GO:0005730:nucleolus;GO:0005794:Golgi apparatus;GO:0005829:cytosol;GO:0005886:plasma membrane;GO:0005887:integral component of plasma membrane;GO:0016020:membrane;GO:0031012:extracellular matrix;GO:0045121:membrane raft;GO:0070062:extracellular exosome;	GO:0001077:RNA polymerase II core promoter proximal region sequence-specific DNA binding transcription factor activity involved in positive regulation of transcription;GO:0003677:DNA binding;GO:0005154:epidermal growth factor receptor binding;GO:0005509:calcium ion binding;GO:0017124:SH3 domain binding;GO:0017128:phospholipid scramblase activity;GO:0019899:enzyme binding;GO:0042609:CD4 receptor b…	-
ENSMUSG00000097391	180.612	2.66157	0.152336	17.4717	2.35e-68	8.89e-67	12	109729764	109749460	+	Mirg	miRNA containing gene [Source:MGI Symbol%3BAcc:MGI:3781106]	-	-	-	-
ENSMUSG00000022708	1077.84	1.11569	0.0638622	17.4702	2.41e-68	9.09e-67	16	42875881	43642602	+	Zbtb20	zinc finger and BTB domain containing 20 [Source:MGI Symbol%3BAcc:MGI:1929213]	GO:0000122:negative regulation of transcription from RNA polymerase II promoter;GO:0006351:transcription, DNA-templated;GO:0010629:negative regulation of gene expression;GO:0032728:positive regulation of interferon-beta production;GO:0032755:positive regulation of interleukin-6 production;GO:0032760:positive regulation of tumor necrosis factor production;GO:0045892:negative regulation of transcri…	GO:0005634:nucleus;	GO:0001078:RNA polymerase II core promoter proximal region sequence-specific DNA binding transcription factor activity involved in negative regulation of transcription;GO:0003677:DNA binding;GO:0046872:metal ion binding;	K10501
ENSMUSG00000026235	123.012	4.24372	0.242925	17.4693	2.46e-68	9.24e-67	1	77367185	77515088	-	Epha4	Eph receptor A4 [Source:MGI Symbol%3BAcc:MGI:98277]	GO:0007155:cell adhesion;GO:0007411:axon guidance;GO:0007628:adult walking behavior;GO:0008045:motor neuron axon guidance;GO:0008347:glial cell migration;GO:0010977:negative regulation of neuron projection development;GO:0018108:peptidyl-tyrosine phosphorylation;GO:0021957:corticospinal tract morphogenesis;GO:0043087:regulation of GTPase activity;GO:0043507:positive regulation of JUN kinase activ…	GO:0005737:cytoplasm;GO:0005741:mitochondrial outer membrane;GO:0005783:endoplasmic reticulum;GO:0005794:Golgi apparatus;GO:0005886:plasma membrane;GO:0005887:integral component of plasma membrane;GO:0009986:cell surface;GO:0014069:postsynaptic density;GO:0030054:cell junction;GO:0030175:filopodium;GO:0030424:axon;GO:0030425:dendrite;GO:0031594:neuromuscular junction;GO:0031901:early endosome mem…	GO:0004672:protein kinase activity;GO:0005004:GPI-linked ephrin receptor activity;GO:0005005:transmembrane-ephrin receptor activity;GO:0005515:protein binding;GO:0005524:ATP binding;GO:0042731:PH domain binding;GO:0042802:identical protein binding;GO:0046875:ephrin receptor binding;GO:0097161:DH domain binding;	K05105
ENSMUSG00000024661	45913.7	-0.860929	0.0493083	-17.4601	2.88e-68	1.08e-66	19	9982703	9985092	+	Fth1	ferritin heavy polypeptide 1 [Source:MGI Symbol%3BAcc:MGI:95588]	GO:0006880:intracellular sequestering of iron ion;GO:0006898:receptor-mediated endocytosis;GO:0006955:immune response;GO:0008285:negative regulation of cell proliferation;GO:0048147:negative regulation of fibroblast proliferation;GO:0055114:oxidation-reduction process;GO:0097286:iron ion import;	GO:0005576:extracellular region;GO:0005634:nucleus;GO:0005739:mitochondrion;GO:0044754:autolysosome;GO:0070062:extracellular exosome;GO:0071682:endocytic vesicle lumen;	GO:0004322:ferroxidase activity;GO:0005506:iron ion binding;GO:0008199:ferric iron binding;	K00522
ENSMUSG00000001910	2927.15	-0.791945	0.0453681	-17.456	3.1e-68	1.16e-66	8	84670483	84687862	-	Nacc1	nucleus accumbens associated 1%2C BEN and BTB (POZ) domain containing [Source:MGI Symbol%3BAcc:MGI:1914080]	GO:0006351:transcription, DNA-templated;GO:0008284:positive regulation of cell proliferation;GO:0045892:negative regulation of transcription, DNA-templated;GO:0051260:protein homooligomerization;	GO:0005634:nucleus;GO:0005654:nucleoplasm;GO:0005737:cytoplasm;GO:0016604:nuclear body;GO:0030054:cell junction;GO:0043231:intracellular membrane-bounded organelle;	GO:0005515:protein binding;	K10486
ENSMUSG00000015619	155.073	3.0791	0.176421	17.4531	3.26e-68	1.22e-66	2	9857078	9890034	-	Gata3	GATA binding protein 3 [Source:MGI Symbol%3BAcc:MGI:95663]	GO:0000122:negative regulation of transcription from RNA polymerase II promoter;GO:0000902:cell morphogenesis;GO:0001701:in utero embryonic development;GO:0001709:cell fate determination;GO:0001764:neuron migration;GO:0001775:cell activation;GO:0001806:type IV hypersensitivity;GO:0001819:positive regulation of cytokine production;GO:0001822:kidney development;GO:0001823:mesonephros development;GO…	GO:0000790:nuclear chromatin;GO:0005634:nucleus;GO:0005654:nucleoplasm;GO:0005667:transcription factor complex;	GO:0000976:transcription regulatory region sequence-specific DNA binding;GO:0000977:RNA polymerase II regulatory region sequence-specific DNA binding;GO:0000979:RNA polymerase II core promoter sequence-specific DNA binding;GO:0000987:core promoter proximal region sequence-specific DNA binding;GO:0001046:core promoter sequence-specific DNA binding;GO:0001077:RNA polymerase II core promoter proxima…	K17895
ENSMUSG00000009097	148.108	-5.88849	0.33748	-17.4484	3.54e-68	1.32e-66	16	18581713	18586969	-	Tbx1	T-box 1 [Source:MGI Symbol%3BAcc:MGI:98493]	GO:0000122:negative regulation of transcription from RNA polymerase II promoter;GO:0001525:angiogenesis;GO:0001568:blood vessel development;GO:0001569:patterning of blood vessels;GO:0001708:cell fate specification;GO:0001755:neural crest cell migration;GO:0001934:positive regulation of protein phosphorylation;GO:0001945:lymph vessel development;GO:0001974:blood vessel remodeling;GO:0002053:positi…	GO:0005634:nucleus;	GO:0001162:RNA polymerase II intronic transcription regulatory region sequence-specific DNA binding;GO:0001228:RNA polymerase II transcription regulatory region sequence-specific DNA binding transcription factor activity involved in positive regulation of transcription;GO:0003677:DNA binding;GO:0005515:protein binding;GO:0042803:protein homodimerization activity;GO:0043565:sequence-specific DNA b…	K10175
ENSMUSG00000037411	2389.67	0.870471	0.0499321	17.4331	4.63e-68	1.72e-66	5	137061504	137072268	-	Serpine1	serine (or cysteine) peptidase inhibitor%2C clade E%2C member 1 [Source:MGI Symbol%3BAcc:MGI:97608]	GO:0001890:placenta development;GO:0010469:regulation of receptor activity;GO:0010757:negative regulation of plasminogen activation;GO:0010951:negative regulation of endopeptidase activity;GO:0014912:negative regulation of smooth muscle cell migration;GO:0030194:positive regulation of blood coagulation;GO:0030336:negative regulation of cell migration;GO:0032757:positive regulation of interleukin-…	GO:0005576:extracellular region;GO:0005615:extracellular space;GO:0031012:extracellular matrix;GO:0070062:extracellular exosome;	GO:0002020:protease binding;GO:0004867:serine-type endopeptidase inhibitor activity;GO:0005102:receptor binding;GO:0005515:protein binding;	K03982
ENSMUSG00000072501	2370.75	0.782473	0.0449031	17.4258	5.25e-68	1.95e-66	15	66577572	66645255	+	Phf20l1	PHD finger protein 20-like 1 [Source:MGI Symbol%3BAcc:MGI:2444412]	GO:0006355:regulation of transcription, DNA-templated;GO:0008150:biological_process;	GO:0005575:cellular_component;GO:0005634:nucleus;	GO:0003674:molecular_function;GO:0046872:metal ion binding;	K18402
ENSMUSG00000020057	492.483	-1.49864	0.0860235	-17.4212	5.69e-68	2.11e-66	10	88322804	88379080	-	Dram1	DNA-damage regulated autophagy modulator 1 [Source:MGI Symbol%3BAcc:MGI:1918962]	GO:0006914:autophagy;GO:0006915:apoptotic process;GO:0010506:regulation of autophagy;	GO:0005737:cytoplasm;GO:0005764:lysosome;GO:0005765:lysosomal membrane;GO:0016021:integral component of membrane;	GO:0003674:molecular_function;	K21955
ENSMUSG00000031903	630.002	-1.34231	0.077175	-17.3931	9.31e-68	3.45e-66	8	106150399	106164715	+	Pla2g15	phospholipase A2%2C group XV [Source:MGI Symbol%3BAcc:MGI:2178076]	GO:0006631:fatty acid metabolic process;GO:0006650:glycerophospholipid metabolic process;GO:0006672:ceramide metabolic process;GO:0034638:phosphatidylcholine catabolic process;GO:0046338:phosphatidylethanolamine catabolic process;	GO:0005615:extracellular space;GO:0005654:nucleoplasm;GO:0005739:mitochondrion;GO:0005764:lysosome;GO:0016020:membrane;GO:0043231:intracellular membrane-bounded organelle;GO:0070062:extracellular exosome;	GO:0004622:lysophospholipase activity;GO:0008374:O-acyltransferase activity;GO:0047499:calcium-independent phospholipase A2 activity;	K06129
ENSMUSG00000052713	474.909	-1.62112	0.0932745	-17.3801	1.17e-67	4.32e-66	18	54888045	54990180	-	Zfp608	zinc finger protein 608 [Source:MGI Symbol%3BAcc:MGI:2442338]	-	-	-	-
ENSMUSG00000048756	1152.24	-1.03999	0.0598649	-17.3723	1.34e-67	4.93e-66	10	42181841	42276755	-	Foxo3	forkhead box O3 [Source:MGI Symbol%3BAcc:MGI:1890081]	GO:0000122:negative regulation of transcription from RNA polymerase II promoter;GO:0001542:ovulation from ovarian follicle;GO:0001544:initiation of primordial ovarian follicle growth;GO:0001547:antral ovarian follicle growth;GO:0001556:oocyte maturation;GO:0006355:regulation of transcription, DNA-templated;GO:0006357:regulation of transcription from RNA polymerase II promoter;GO:0006366:transcrip…	GO:0005634:nucleus;GO:0005654:nucleoplasm;GO:0005737:cytoplasm;GO:0005739:mitochondrion;GO:0005829:cytosol;GO:0016020:membrane;	GO:0001047:core promoter binding;GO:0001221:transcription cofactor binding;GO:0001227:RNA polymerase II transcription regulatory region sequence-specific DNA binding transcription factor activity involved in negative regulation of transcription;GO:0001228:RNA polymerase II transcription regulatory region sequence-specific DNA binding transcription factor activity involved in positive regulation o…	K09408
ENSMUSG00000021910	7992.01	-0.646124	0.0372047	-17.3667	1.47e-67	5.42e-66	14	31170930	31216946	-	Nisch	nischarin [Source:MGI Symbol%3BAcc:MGI:1928323]	GO:0006006:glucose metabolic process;GO:0006915:apoptotic process;GO:0008217:regulation of blood pressure;GO:0016601:Rac protein signal transduction;GO:0030036:actin cytoskeleton organization;GO:0030336:negative regulation of cell migration;GO:0032228:regulation of synaptic transmission, GABAergic;GO:0048243:norepinephrine secretion;	GO:0005769:early endosome;GO:0005829:cytosol;GO:0005886:plasma membrane;GO:0055037:recycling endosome;	GO:0005178:integrin binding;GO:0035091:phosphatidylinositol binding;GO:0042802:identical protein binding;	-
ENSMUSG00000039058	397.571	1.76484	0.10166	17.3602	1.65e-67	6.07e-66	3	152462815	152668360	-	Ak5	adenylate kinase 5 [Source:MGI Symbol%3BAcc:MGI:2677491]	GO:0006165:nucleoside diphosphate phosphorylation;GO:0009142:nucleoside triphosphate biosynthetic process;GO:0009165:nucleotide biosynthetic process;GO:0046034:ATP metabolic process;	GO:0005815:microtubule organizing center;GO:0005829:cytosol;	GO:0004017:adenylate kinase activity;GO:0004550:nucleoside diphosphate kinase activity;GO:0005524:ATP binding;GO:0019206:nucleoside kinase activity;	K13800
ENSMUSG00000041754	197.791	2.47015	0.142401	17.3465	2.1e-67	7.69e-66	17	48247777	48258841	+	Trem3	triggering receptor expressed on myeloid cells 3 [Source:MGI Symbol%3BAcc:MGI:1930003]	GO:0002374:cytokine secretion involved in immune response;GO:0016477:cell migration;GO:0030593:neutrophil chemotaxis;GO:0042107:cytokine metabolic process;GO:0050755:chemokine metabolic process;GO:0070945:neutrophil mediated killing of gram-negative bacterium;GO:0072672:neutrophil extravasation;	GO:0016021:integral component of membrane;	GO:0001530:lipopolysaccharide binding;GO:0005515:protein binding;GO:0042834:peptidoglycan binding;GO:0070891:lipoteichoic acid binding;	-
ENSMUSG00000031532	2409.3	-0.779703	0.044992	-17.3298	2.8e-67	1.03e-65	8	34154575	34170821	+	Saraf	store-operated calcium entry-associated regulatory factor [Source:MGI Symbol%3BAcc:MGI:1915137]	GO:0006816:calcium ion transport;GO:2001256:regulation of store-operated calcium entry;	GO:0005783:endoplasmic reticulum;GO:0030176:integral component of endoplasmic reticulum membrane;	-	-
ENSMUSG00000031976	1248.76	-1.14106	0.0659736	-17.2957	5.07e-67	1.85e-65	8	124021508	124048505	+	Urb2	URB2 ribosome biogenesis 2 homolog (S. cerevisiae) [Source:MGI Symbol%3BAcc:MGI:2681124]	GO:0042254:ribosome biogenesis;	GO:0005730:nucleolus;GO:0016235:aggresome;GO:0030496:midbody;	GO:0003674:molecular_function;	K14862
ENSMUSG00000031642	688.051	-1.32562	0.0766722	-17.2895	5.65e-67	2.06e-65	8	61223872	61396071	+	Sh3rf1	SH3 domain containing ring finger 1 [Source:MGI Symbol%3BAcc:MGI:1913066]	GO:0006915:apoptotic process;GO:0016567:protein ubiquitination;GO:0043066:negative regulation of apoptotic process;GO:0043154:negative regulation of cysteine-type endopeptidase activity involved in apoptotic process;GO:0046328:regulation of JNK cascade;GO:2001237:negative regulation of extrinsic apoptotic signaling pathway;	GO:0005794:Golgi apparatus;GO:0005829:cytosol;GO:0030027:lamellipodium;GO:0048471:perinuclear region of cytoplasm;	GO:0005515:protein binding;GO:0016740:transferase activity;GO:0046872:metal ion binding;	K12171
ENSMUSG00000025171	558.475	1.42931	0.0827521	17.2722	7.62e-67	2.77e-65	19	41981763	42034641	+	Ubtd1	ubiquitin domain containing 1 [Source:MGI Symbol%3BAcc:MGI:2385092]	GO:0008150:biological_process;	GO:0005575:cellular_component;	GO:0003674:molecular_function;GO:0043130:ubiquitin binding;	-
ENSMUSG00000040010	4935.34	-0.783622	0.0454112	-17.2561	1.01e-66	3.66e-65	8	121881150	121907694	-	Slc7a5	solute carrier family 7 (cationic amino acid transporter%2C y+ system)%2C member 5 [Source:MGI Symbol%3BAcc:MGI:1298205]	GO:0007399:nervous system development;GO:0015804:neutral amino acid transport;GO:0015807:L-amino acid transport;GO:0030154:cell differentiation;GO:1902475:L-alpha-amino acid transmembrane transport;	GO:0005829:cytosol;GO:0005886:plasma membrane;GO:0005887:integral component of plasma membrane;GO:0016020:membrane;GO:0016324:apical plasma membrane;GO:0043231:intracellular membrane-bounded organelle;GO:0070062:extracellular exosome;	GO:0015175:neutral amino acid transmembrane transporter activity;GO:0015179:L-amino acid transmembrane transporter activity;GO:0015297:antiporter activity;	K13780
ENSMUSG00000039318	988.697	-1.07412	0.0622494	-17.2551	1.02e-66	3.71e-65	1	185204117	185286759	+	Rab3gap2	RAB3 GTPase activating protein subunit 2 [Source:MGI Symbol%3BAcc:MGI:1916043]	GO:0006886:intracellular protein transport;GO:0043087:regulation of GTPase activity;GO:0043547:positive regulation of GTPase activity;GO:0097051:establishment of protein localization to endoplasmic reticulum membrane;GO:1903061:positive regulation of protein lipidation;GO:1903373:positive regulation of endoplasmic reticulum tubular network organization;GO:2000786:positive regulation of autophagos…	GO:0005829:cytosol;GO:0005886:plasma membrane;GO:0043234:protein complex;	GO:0005096:GTPase activator activity;GO:0017112:Rab guanyl-nucleotide exchange factor activity;GO:0017137:Rab GTPase binding;GO:0030234:enzyme regulator activity;GO:0046982:protein heterodimerization activity;	K19937
ENSMUSG00000031568	2121.91	-0.861282	0.0499648	-17.2378	1.38e-66	5e-65	8	47533664	47552955	+	Rwdd4a	RWD domain containing 4A [Source:MGI Symbol%3BAcc:MGI:2681000]	-	-	-	-
ENSMUSG00000029651	114.401	5.32557	0.309277	17.2194	1.9e-66	6.86e-65	5	147957320	148316065	+	Mtus2	microtubule associated tumor suppressor candidate 2 [Source:MGI Symbol%3BAcc:MGI:1915388]	-	GO:0005634:nucleus;GO:0005813:centrosome;GO:0005881:cytoplasmic microtubule;GO:0015630:microtubule cytoskeleton;GO:0045171:intercellular bridge;	GO:0008017:microtubule binding;GO:0042803:protein homodimerization activity;	-
ENSMUSG00000027335	131.835	-4.55777	0.264705	-17.2183	1.93e-66	6.97e-65	2	131545850	131562283	-	Adra1d	adrenergic receptor%2C alpha 1d [Source:MGI Symbol%3BAcc:MGI:106673]	GO:0001986:negative regulation of the force of heart contraction involved in baroreceptor response to increased systemic arterial blood pressure;GO:0001994:norepinephrine-epinephrine vasoconstriction involved in regulation of systemic arterial blood pressure;GO:0007200:phospholipase C-activating G-protein coupled receptor signaling pathway;GO:0007204:positive regulation of cytosolic calcium ion c…	GO:0005887:integral component of plasma membrane;	GO:0004937:alpha1-adrenergic receptor activity;	K04137
ENSMUSG00000090290	666.639	-1.3203	0.0766878	-17.2166	1.99e-66	7.18e-65	8	126425329	126475065	-	Tarbp1	TAR RNA binding protein 1 [Source:MGI Symbol%3BAcc:MGI:4936930]	GO:0000453:enzyme-directed rRNA 2'-O-methylation;GO:0030488:tRNA methylation;	-	GO:0003723:RNA binding;GO:0016423:tRNA (guanine) methyltransferase activity;GO:0070039:rRNA (guanosine-2'-O-)-methyltransferase activity;	-
ENSMUSG00000034620	1230.58	0.983053	0.0571004	17.2162	2.01e-66	7.2e-65	10	122078114	122097371	-	Tmem5	transmembrane protein 5 [Source:MGI Symbol%3BAcc:MGI:2384919]	GO:0035269:protein O-linked mannosylation;	GO:0000139:Golgi membrane;GO:0005654:nucleoplasm;GO:0005794:Golgi apparatus;GO:0016021:integral component of membrane;	GO:0003674:molecular_function;	K21052
ENSMUSG00000038210	135.263	-5.28615	0.307054	-17.2157	2.02e-66	7.25e-65	6	52242106	52245810	-	Hoxa11	homeobox A11 [Source:MGI Symbol%3BAcc:MGI:96172]	GO:0001501:skeletal system development;GO:0001656:metanephros development;GO:0001658:branching involved in ureteric bud morphogenesis;GO:0001759:organ induction;GO:0006351:transcription, DNA-templated;GO:0007275:multicellular organismal development;GO:0007283:spermatogenesis;GO:0007338:single fertilization;GO:0007501:mesodermal cell fate specification;GO:0008584:male gonad development;GO:0009952:…	GO:0005654:nucleoplasm;GO:0005667:transcription factor complex;GO:0032993:protein-DNA complex;GO:0043234:protein complex;	GO:0003677:DNA binding;GO:0005515:protein binding;GO:0043565:sequence-specific DNA binding;	K21951
ENSMUSG00000035107	2289.71	-1.04751	0.060901	-17.2002	2.65e-66	9.46e-65	16	58408443	58469727	+	Dcbld2	discoidin%2C CUB and LCCL domain containing 2 [Source:MGI Symbol%3BAcc:MGI:1920629]	GO:0030308:negative regulation of cell growth;GO:0042060:wound healing;	GO:0005887:integral component of plasma membrane;GO:0009986:cell surface;	-	-
ENSMUSG00000050910	1325.64	-0.984618	0.0572851	-17.188	3.26e-66	1.17e-64	11	115381916	115396132	+	Cdr2l	cerebellar degeneration-related protein 2-like [Source:MGI Symbol%3BAcc:MGI:2684867]	GO:0008150:biological_process;	GO:0005575:cellular_component;	GO:0003674:molecular_function;	-
ENSMUSG00000031772	138.377	-5.81283	0.338457	-17.1745	4.12e-66	1.47e-64	8	112570043	112882717	+	Cntnap4	contactin associated protein-like 4 [Source:MGI Symbol%3BAcc:MGI:2183572]	GO:0007155:cell adhesion;GO:0032225:regulation of synaptic transmission, dopaminergic;GO:0032228:regulation of synaptic transmission, GABAergic;GO:2000821:regulation of grooming behavior;	GO:0016021:integral component of membrane;GO:0030054:cell junction;GO:0030425:dendrite;GO:0042734:presynaptic membrane;	GO:0005515:protein binding;	-
ENSMUSG00000022464	1592.73	1.07742	0.0629329	17.1201	1.05e-65	3.74e-64	15	96994823	97055956	-	Slc38a4	solute carrier family 38%2C member 4 [Source:MGI Symbol%3BAcc:MGI:1916604]	GO:0003333:amino acid transmembrane transport;GO:0006814:sodium ion transport;	GO:0005887:integral component of plasma membrane;	GO:0015171:amino acid transmembrane transporter activity;GO:0015293:symporter activity;	K14991
ENSMUSG00000006519	856.119	-1.2988	0.0758663	-17.1196	1.06e-65	3.76e-64	8	122424776	122432930	-	Cyba	cytochrome b-245%2C alpha polypeptide [Source:MGI Symbol%3BAcc:MGI:1316658]	GO:0001666:response to hypoxia;GO:0001938:positive regulation of endothelial cell proliferation;GO:0003106:negative regulation of glomerular filtration by angiotensin;GO:0006801:superoxide metabolic process;GO:0006954:inflammatory response;GO:0014823:response to activity;GO:0014895:smooth muscle hypertrophy;GO:0017004:cytochrome complex assembly;GO:0030307:positive regulation of cell growth;GO:00…	GO:0001725:stress fiber;GO:0005634:nucleus;GO:0005737:cytoplasm;GO:0005739:mitochondrion;GO:0005768:endosome;GO:0005794:Golgi apparatus;GO:0005925:focal adhesion;GO:0016020:membrane;GO:0016324:apical plasma membrane;GO:0030425:dendrite;GO:0043020:NADPH oxidase complex;GO:0043025:neuronal cell body;GO:0097038:perinuclear endoplasmic reticulum;	GO:0005515:protein binding;GO:0009055:electron carrier activity;GO:0016175:superoxide-generating NADPH oxidase activity;GO:0017124:SH3 domain binding;GO:0020037:heme binding;GO:0046872:metal ion binding;GO:0046982:protein heterodimerization activity;	K08009
ENSMUSG00000050379	472.551	1.4741	0.0861228	17.1162	1.12e-65	3.98e-64	X	36911326	36991794	-	2026-09-06	septin 6 [Source:MGI Symbol%3BAcc:MGI:1888939]	GO:0007049:cell cycle;GO:0007283:spermatogenesis;GO:0030154:cell differentiation;GO:0051301:cell division;	GO:0000777:condensed chromosome kinetochore;GO:0005819:spindle;GO:0005940:septin ring;GO:0008021:synaptic vesicle;GO:0030496:midbody;GO:0031105:septin complex;GO:0032154:cleavage furrow;GO:0032173:septin collar;GO:0043679:axon terminus;GO:0097227:sperm annulus;	GO:0005515:protein binding;GO:0005525:GTP binding;	K16939
ENSMUSG00000032939	2355.67	-0.877056	0.051326	-17.088	1.82e-65	6.45e-64	8	94214564	94317227	+	Nup93	nucleoporin 93 [Source:MGI Symbol%3BAcc:MGI:1919055]	GO:0006998:nuclear envelope organization;GO:0016973:poly(A)+ mRNA export from nucleus;GO:0051292:nuclear pore complex assembly;GO:0060391:positive regulation of SMAD protein import into nucleus;GO:0060395:SMAD protein signal transduction;GO:0072001:renal system development;GO:0072015:glomerular visceral epithelial cell development;GO:0090521:glomerular visceral epithelial cell migration;GO:190320…	GO:0005635:nuclear envelope;GO:0005643:nuclear pore;GO:0016020:membrane;GO:0031965:nuclear membrane;GO:0034399:nuclear periphery;	GO:0017056:structural constituent of nuclear pore;	K14309
ENSMUSG00000020901	110.245	5.36417	0.313969	17.085	1.92e-65	6.77e-64	11	68432121	68497849	+	Pik3r5	phosphoinositide-3-kinase%2C regulatory subunit 5%2C p101 [Source:MGI Symbol%3BAcc:MGI:2443588]	GO:0007186:G-protein coupled receptor signaling pathway;GO:0014065:phosphatidylinositol 3-kinase signaling;GO:0043406:positive regulation of MAP kinase activity;GO:0043551:regulation of phosphatidylinositol 3-kinase activity;GO:0051897:positive regulation of protein kinase B signaling;	GO:0005634:nucleus;GO:0005737:cytoplasm;GO:0005815:microtubule organizing center;GO:0005829:cytosol;GO:0005886:plasma membrane;GO:0005942:phosphatidylinositol 3-kinase complex;GO:0005944:phosphatidylinositol 3-kinase complex, class IB;GO:0016020:membrane;	GO:0031683:G-protein beta/gamma-subunit complex binding;GO:0046935:1-phosphatidylinositol-3-kinase regulator activity;	K21290
ENSMUSG00000019055	578.315	-1.41958	0.0831293	-17.0768	2.21e-65	7.79e-64	4	147909753	147936767	-	Plod1	procollagen-lysine%2C 2-oxoglutarate 5-dioxygenase 1 [Source:MGI Symbol%3BAcc:MGI:99907]	GO:0001666:response to hypoxia;GO:0008544:epidermis development;GO:0017185:peptidyl-lysine hydroxylation;GO:0046947:hydroxylysine biosynthetic process;GO:0055114:oxidation-reduction process;	GO:0030867:rough endoplasmic reticulum membrane;GO:0070062:extracellular exosome;	GO:0005506:iron ion binding;GO:0008475:procollagen-lysine 5-dioxygenase activity;GO:0031418:L-ascorbic acid binding;	-
ENSMUSG00000035473	168.36	-2.86615	0.167843	-17.0763	2.23e-65	7.83e-64	17	80127471	80185101	+	Galm	galactose mutarotase [Source:MGI Symbol%3BAcc:MGI:2442420]	GO:0005975:carbohydrate metabolic process;GO:0006006:glucose metabolic process;GO:0006012:galactose metabolic process;GO:0033499:galactose catabolic process via UDP-galactose;	GO:0005737:cytoplasm;GO:0070062:extracellular exosome;	GO:0004034:aldose 1-epimerase activity;GO:0030246:carbohydrate binding;GO:0042803:protein homodimerization activity;	-
ENSMUSG00000019718	231.768	2.3536	0.137921	17.0649	2.71e-65	9.51e-64	12	72073428	72085439	-	L3hypdh	L-3-hydroxyproline dehydratase (trans-) [Source:MGI Symbol%3BAcc:MGI:1914467]	GO:0008152:metabolic process;	GO:0005575:cellular_component;	GO:0016836:hydro-lyase activity;GO:0018112:proline racemase activity;GO:0050346:trans-L-3-hydroxyproline dehydratase activity;	K18384
ENSMUSG00000031967	1791.54	-0.847998	0.0497153	-17.0571	3.1e-65	1.09e-63	8	123477903	123503916	+	Afg3l1	AFG3-like AAA ATPase 1 [Source:MGI Symbol%3BAcc:MGI:1928277]	GO:0007005:mitochondrion organization;GO:0008053:mitochondrial fusion;GO:0034982:mitochondrial protein processing;GO:0042407:cristae formation;	GO:0005739:mitochondrion;GO:0005745:m-AAA complex;	GO:0004222:metalloendopeptidase activity;GO:0005524:ATP binding;GO:0008270:zinc ion binding;	-
ENSMUSG00000038375	434.341	-1.70899	0.100266	-17.0445	3.84e-65	1.34e-63	2	155381059	155389850	+	Trp53inp2	transformation related protein 53 inducible nuclear protein 2 [Source:MGI Symbol%3BAcc:MGI:1915978]	-	-	-	-
ENSMUSG00000023004	17022.9	0.704494	0.0413514	17.0368	4.38e-65	1.53e-63	15	98931425	98934565	-	Tuba1b	tubulin%2C alpha 1B [Source:MGI Symbol%3BAcc:MGI:107804]	GO:0000226:microtubule cytoskeleton organization;GO:0071353:cellular response to interleukin-4;	GO:0005829:cytosol;GO:0005874:microtubule;GO:0005881:cytoplasmic microtubule;GO:0015630:microtubule cytoskeleton;GO:0043209:myelin sheath;GO:0045121:membrane raft;GO:0070062:extracellular exosome;	GO:0003725:double-stranded RNA binding;GO:0003924:GTPase activity;GO:0005200:structural constituent of cytoskeleton;GO:0005515:protein binding;GO:0005525:GTP binding;GO:0031625:ubiquitin protein ligase binding;	K07374
ENSMUSG00000096965	508.213	-1.47889	0.0868733	-17.0235	5.5e-65	1.92e-63	17	5798657	5803240	+	3300005D01Rik	RIKEN cDNA 3300005D01 gene [Source:MGI Symbol%3BAcc:MGI:1925762]	-	-	-	-
ENSMUSG00000033685	129.714	-5.09578	0.29937	-17.0217	5.67e-65	1.97e-63	7	100493337	100502020	+	Ucp2	uncoupling protein 2 (mitochondrial%2C proton carrier) [Source:MGI Symbol%3BAcc:MGI:109354]	GO:0000303:response to superoxide;GO:0001666:response to hypoxia;GO:0006839:mitochondrial transport;GO:0007565:female pregnancy;GO:0007568:aging;GO:0009409:response to cold;GO:0010942:positive regulation of cell death;GO:0015992:proton transport;GO:0032869:cellular response to insulin stimulus;GO:0034198:cellular response to amino acid starvation;GO:0043066:negative regulation of apoptotic proces…	GO:0005739:mitochondrion;GO:0005743:mitochondrial inner membrane;GO:0016021:integral component of membrane;	GO:0017077:oxidative phosphorylation uncoupler activity;	K15103;K15100
ENSMUSG00000033658	710.366	-1.29821	0.0762812	-17.0187	5.96e-65	2.07e-63	8	111003188	111031751	-	Ddx19b	DEAD (Asp-Glu-Ala-Asp) box polypeptide 19b [Source:MGI Symbol%3BAcc:MGI:2148251]	GO:0008380:RNA splicing;GO:0010468:regulation of gene expression;GO:0010501:RNA secondary structure unwinding;	GO:0005635:nuclear envelope;GO:0005730:nucleolus;GO:0005737:cytoplasm;GO:0016020:membrane;GO:0070062:extracellular exosome;GO:0071013:catalytic step 2 spliceosome;	GO:0003676:nucleic acid binding;GO:0004004:ATP-dependent RNA helicase activity;GO:0005524:ATP binding;	K18655
ENSMUSG00000003033	1295.16	-0.977581	0.0575101	-16.9984	8.43e-65	2.92e-63	8	72240018	72257385	+	Ap1m1	adaptor-related protein complex AP-1%2C mu subunit 1 [Source:MGI Symbol%3BAcc:MGI:102776]	GO:0006886:intracellular protein transport;GO:0016192:vesicle-mediated transport;GO:0032438:melanosome organization;GO:0035646:endosome to melanosome transport;	GO:0005802:trans-Golgi network;GO:0016020:membrane;GO:0030131:clathrin adaptor complex;GO:0030665:clathrin-coated vesicle membrane;GO:0070062:extracellular exosome;	GO:0005515:protein binding;	-
ENSMUSG00000033307	7420.27	0.749869	0.0441246	16.9943	9.04e-65	3.13e-63	10	75859353	75860240	-	Mif	macrophage migration inhibitory factor (glycosylation-inhibiting factor) [Source:MGI Symbol%3BAcc:MGI:96982]	GO:0001516:prostaglandin biosynthetic process;GO:0001934:positive regulation of protein phosphorylation;GO:0002821:positive regulation of adaptive immune response;GO:0002906:negative regulation of mature B cell apoptotic process;GO:0006954:inflammatory response;GO:0007166:cell surface receptor signaling pathway;GO:0007569:cell aging;GO:0008283:cell proliferation;GO:0010629:negative regulation of …	GO:0005576:extracellular region;GO:0005615:extracellular space;GO:0005654:nucleoplasm;GO:0005829:cytosol;GO:0009986:cell surface;GO:0031982:vesicle;GO:0043209:myelin sheath;GO:0070062:extracellular exosome;	GO:0004167:dopachrome isomerase activity;GO:0005102:receptor binding;GO:0005125:cytokine activity;GO:0005126:cytokine receptor binding;GO:0042056:chemoattractant activity;GO:0050178:phenylpyruvate tautomerase activity;	K07253
ENSMUSG00000025764	1975.56	0.888129	0.0522628	16.9935	9.17e-65	3.17e-63	3	41555731	41616864	+	Jade1	jade family PHD finger 1 [Source:MGI Symbol%3BAcc:MGI:1925835]	GO:0006351:transcription, DNA-templated;GO:0006915:apoptotic process;GO:0043966:histone H3 acetylation;GO:0043981:histone H4-K5 acetylation;GO:0043982:histone H4-K8 acetylation;GO:0043983:histone H4-K12 acetylation;GO:0043984:histone H4-K16 acetylation;GO:0045944:positive regulation of transcription from RNA polymerase II promoter;GO:0090090:negative regulation of canonical Wnt signaling pathway;…	GO:0000123:histone acetyltransferase complex;GO:0005634:nucleus;GO:0005737:cytoplasm;GO:0005829:cytosol;GO:0005886:plasma membrane;GO:0036064:ciliary basal body;	GO:0001105:RNA polymerase II transcription coactivator activity;GO:0046872:metal ion binding;	K11347
ENSMUSG00000024843	2612.5	0.765427	0.045098	16.9725	1.31e-64	4.52e-63	19	3851773	3894369	+	Chka	choline kinase alpha [Source:MGI Symbol%3BAcc:MGI:107760]	GO:0006580:ethanolamine metabolic process;GO:0006646:phosphatidylethanolamine biosynthetic process;GO:0006656:phosphatidylcholine biosynthetic process;GO:0006657:CDP-choline pathway;GO:0009636:response to toxic substance;GO:0016310:phosphorylation;GO:0019695:choline metabolic process;	GO:0005737:cytoplasm;	GO:0004103:choline kinase activity;GO:0004104:cholinesterase activity;GO:0004305:ethanolamine kinase activity;GO:0005524:ATP binding;GO:0008144:drug binding;GO:0033265:choline binding;GO:0042803:protein homodimerization activity;	K14156
ENSMUSG00000015994	1563.51	-0.901355	0.0531537	-16.9575	1.69e-64	5.83e-63	8	25998722	26015650	-	Fnta	farnesyltransferase%2C CAAX box%2C alpha [Source:MGI Symbol%3BAcc:MGI:104683]	GO:0018343:protein farnesylation;GO:0018344:protein geranylgeranylation;GO:0045213:neurotransmitter receptor metabolic process;GO:0071340:skeletal muscle acetylcholine-gated channel clustering;GO:0090044:positive regulation of tubulin deacetylation;GO:0090045:positive regulation of deacetylase activity;	GO:0005875:microtubule associated complex;GO:0005886:plasma membrane;GO:0005953:CAAX-protein geranylgeranyltransferase complex;GO:0005965:protein farnesyltransferase complex;	GO:0004660:protein farnesyltransferase activity;GO:0004661:protein geranylgeranyltransferase activity;GO:0004662:CAAX-protein geranylgeranyltransferase activity;GO:0004663:Rab geranylgeranyltransferase activity;GO:0008017:microtubule binding;GO:0030548:acetylcholine receptor regulator activity;GO:0030971:receptor tyrosine kinase binding;GO:0043014:alpha-tubulin binding;	K05955
ENSMUSG00000049580	720.755	1.26546	0.0746311	16.9563	1.73e-64	5.94e-63	7	98350668	98361328	-	Tsku	tsukushi%2C small leucine rich proteoglycan [Source:MGI Symbol%3BAcc:MGI:2443855]	GO:0007188:adenylate cyclase-modulating G-protein coupled receptor signaling pathway;GO:0010468:regulation of gene expression;GO:0021540:corpus callosum morphogenesis;GO:0021670:lateral ventricle development;GO:0021960:anterior commissure morphogenesis;GO:0030178:negative regulation of Wnt signaling pathway;GO:0043010:camera-type eye development;GO:0061073:ciliary body morphogenesis;	GO:0005615:extracellular space;GO:0005886:plasma membrane;	GO:0004930:G-protein coupled receptor activity;GO:0005515:protein binding;	K08130
ENSMUSG00000030468	416.079	1.61021	0.0949727	16.9544	1.79e-64	6.12e-63	7	43408204	43418358	+	Siglecg	sialic acid binding Ig-like lectin G [Source:MGI Symbol%3BAcc:MGI:2443630]	GO:0002244:hematopoietic progenitor cell differentiation;	GO:0016021:integral component of membrane;	GO:0005515:protein binding;	K06749
ENSMUSG00000052534	2786.82	-0.778898	0.0459643	-16.9457	2.07e-64	7.09e-63	1	168119364	168432270	-	Pbx1	pre B cell leukemia homeobox 1 [Source:MGI Symbol%3BAcc:MGI:97495]	GO:0001655:urogenital system development;GO:0001658:branching involved in ureteric bud morphogenesis;GO:0006366:transcription from RNA polymerase II promoter;GO:0006694:steroid biosynthetic process;GO:0007548:sex differentiation;GO:0008284:positive regulation of cell proliferation;GO:0009887:organ morphogenesis;GO:0009952:anterior/posterior pattern specification;GO:0009954:proximal/distal pattern…	GO:0005634:nucleus;GO:0005654:nucleoplasm;GO:0005667:transcription factor complex;GO:0005737:cytoplasm;GO:0090575:RNA polymerase II transcription factor complex;	GO:0000978:RNA polymerase II core promoter proximal region sequence-specific DNA binding;GO:0001077:RNA polymerase II core promoter proximal region sequence-specific DNA binding transcription factor activity involved in positive regulation of transcription;GO:0003677:DNA binding;GO:0005515:protein binding;GO:0008134:transcription factor binding;GO:0043565:sequence-specific DNA binding;GO:0046982:…	K09355
ENSMUSG00000031431	1423.78	0.949608	0.0561078	16.9247	2.96e-64	1.01e-62	X	140539528	140600659	-	Tsc22d3	TSC22 domain family%2C member 3 [Source:MGI Symbol%3BAcc:MGI:1196284]	GO:0000122:negative regulation of transcription from RNA polymerase II promoter;GO:0006970:response to osmotic stress;GO:0048642:negative regulation of skeletal muscle tissue development;GO:0070236:negative regulation of activation-induced cell death of T cells;	GO:0005634:nucleus;GO:0005737:cytoplasm;	GO:0003700:sequence-specific DNA binding transcription factor activity;GO:0043426:MRF binding;	-
ENSMUSG00000033059	1266.53	-1.10138	0.0650824	-16.9229	3.05e-64	1.04e-62	2	150786735	150831758	+	Pygb	brain glycogen phosphorylase [Source:MGI Symbol%3BAcc:MGI:97828]	GO:0005980:glycogen catabolic process;	GO:0005737:cytoplasm;GO:0016020:membrane;GO:0030424:axon;GO:0070062:extracellular exosome;	GO:0008184:glycogen phosphorylase activity;GO:0030170:pyridoxal phosphate binding;	K00688
ENSMUSG00000031432	1124.54	1.00358	0.0593515	16.909	3.86e-64	1.31e-62	X	140456613	140476140	+	Prps1	phosphoribosyl pyrophosphate synthetase 1 [Source:MGI Symbol%3BAcc:MGI:97775]	GO:0006015:5-phosphoribose 1-diphosphate biosynthetic process;GO:0006144:purine nucleobase metabolic process;GO:0006164:purine nucleotide biosynthetic process;GO:0006167:AMP biosynthetic process;GO:0007399:nervous system development;GO:0009116:nucleoside metabolic process;GO:0016310:phosphorylation;GO:0031100:organ regeneration;GO:0034418:urate biosynthetic process;GO:0046101:hypoxanthine biosynt…	GO:0002189:ribose phosphate diphosphokinase complex;GO:0043234:protein complex;	GO:0000287:magnesium ion binding;GO:0004749:ribose phosphate diphosphokinase activity;GO:0005524:ATP binding;GO:0016208:AMP binding;GO:0016301:kinase activity;GO:0019003:GDP binding;GO:0030246:carbohydrate binding;GO:0042802:identical protein binding;GO:0042803:protein homodimerization activity;GO:0043531:ADP binding;	K00948
ENSMUSG00000107476	808.758	-1.32659	0.078546	-16.8894	5.39e-64	1.83e-62	6	48504337	48534832	+	Zfp862-ps	zinc finger protein 862%2C pseudogene [Source:MGI Symbol%3BAcc:MGI:1889827]	-	-	-	-
ENSMUSG00000070526	108.723	5.86103	0.347054	16.888	5.52e-64	1.87e-62	7	62461871	62464510	-	Peg12	paternally expressed 12 [Source:MGI Symbol%3BAcc:MGI:1351637]	GO:0000578:embryonic axis specification;GO:0016055:Wnt signaling pathway;	-	-	K03069
ENSMUSG00000085492	200.948	2.29308	0.1358	16.8857	5.73e-64	1.94e-62	17	71557027	71598755	-	Trmt61b	tRNA methyltransferase 61B [Source:MGI Symbol%3BAcc:MGI:1916039]	-	-	-	-
ENSMUSG00000044367	127.031	-5.36249	0.317771	-16.8753	6.83e-64	2.31e-62	11	70216789	70221064	-	Slc16a13	solute carrier family 16 (monocarboxylic acid transporters)%2C member 13 [Source:MGI Symbol%3BAcc:MGI:1916559]	GO:0015718:monocarboxylic acid transport;GO:0055085:transmembrane transport;	GO:0000139:Golgi membrane;GO:0005794:Golgi apparatus;GO:0005887:integral component of plasma membrane;	GO:0008028:monocarboxylic acid transmembrane transporter activity;GO:0015293:symporter activity;	K08189
ENSMUSG00000112441	105.653	4.96323	0.294174	16.8718	7.26e-64	2.45e-62	12	8291024	8293694	-	AC122860.2	-	-	-	-	-
ENSMUSG00000025855	213.671	-2.32609	0.137898	-16.8681	7.72e-64	2.6e-62	5	139017306	139150001	-	Prkar1b	protein kinase%2C cAMP dependent regulatory%2C type I beta [Source:MGI Symbol%3BAcc:MGI:97759]	GO:0006468:protein phosphorylation;GO:0007611:learning or memory;GO:0008283:cell proliferation;GO:0009887:organ morphogenesis;GO:2000480:negative regulation of cAMP-dependent protein kinase activity;	GO:0005737:cytoplasm;GO:0005886:plasma membrane;GO:0005952:cAMP-dependent protein kinase complex;	GO:0004862:cAMP-dependent protein kinase inhibitor activity;GO:0008603:cAMP-dependent protein kinase regulator activity;GO:0030552:cAMP binding;GO:0034236:protein kinase A catalytic subunit binding;	K04739
ENSMUSG00000028811	4047.5	-0.683822	0.0406521	-16.8213	1.7e-63	5.73e-62	4	129189760	129219607	+	Yars	tyrosyl-tRNA synthetase [Source:MGI Symbol%3BAcc:MGI:2147627]	GO:0006418:tRNA aminoacylation for protein translation;GO:0006437:tyrosyl-tRNA aminoacylation;	GO:0005829:cytosol;GO:0016604:nuclear body;GO:0017101:aminoacyl-tRNA synthetase multienzyme complex;GO:0017102:methionyl glutamyl tRNA synthetase complex;	GO:0000049:tRNA binding;GO:0003723:RNA binding;GO:0004831:tyrosine-tRNA ligase activity;GO:0005524:ATP binding;	K01866;K15437;K06878
ENSMUSG00000029121	105.14	5.45909	0.324763	16.8094	2.08e-63	6.99e-62	5	37241940	37292133	+	Crmp1	collapsin response mediator protein 1 [Source:MGI Symbol%3BAcc:MGI:107793]	GO:0000226:microtubule cytoskeleton organization;GO:0007411:axon guidance;GO:0010977:negative regulation of neuron projection development;GO:0071526:semaphorin-plexin signaling pathway;	GO:0005815:microtubule organizing center;GO:0005819:spindle;GO:0005829:cytosol;GO:0030425:dendrite;GO:0030426:growth cone;GO:0030496:midbody;GO:0031941:filamentous actin;GO:0043025:neuronal cell body;	GO:0016810:hydrolase activity, acting on carbon-nitrogen (but not peptide) bonds;GO:0031005:filamin binding;GO:0051219:phosphoprotein binding;	-
ENSMUSG00000028382	1679.88	-0.924248	0.0550051	-16.8029	2.32e-63	7.78e-62	4	59471868	59549364	-	Ptbp3	polypyrimidine tract binding protein 3 [Source:MGI Symbol%3BAcc:MGI:1923334]	GO:0006397:mRNA processing;GO:0008380:RNA splicing;GO:0033119:negative regulation of RNA splicing;GO:0043249:erythrocyte maturation;GO:0045595:regulation of cell differentiation;GO:0048025:negative regulation of mRNA splicing, via spliceosome;	GO:0005634:nucleus;	GO:0003723:RNA binding;	K17844
ENSMUSG00000020826	131.526	-5.72598	0.340988	-16.7923	2.78e-63	9.29e-62	11	78920787	78960254	+	Nos2	nitric oxide synthase 2%2C inducible [Source:MGI Symbol%3BAcc:MGI:97361]	GO:0001542:ovulation from ovarian follicle;GO:0001666:response to hypoxia;GO:0006527:arginine catabolic process;GO:0006801:superoxide metabolic process;GO:0006809:nitric oxide biosynthetic process;GO:0006954:inflammatory response;GO:0007263:nitric oxide mediated signal transduction;GO:0007623:circadian rhythm;GO:0010629:negative regulation of gene expression;GO:0018119:peptidyl-cysteine S-nitrosy…	GO:0005622:intracellular;GO:0005737:cytoplasm;GO:0005777:peroxisome;GO:0005829:cytosol;GO:0030863:cortical cytoskeleton;GO:0048471:perinuclear region of cytoplasm;	GO:0003958:NADPH-hemoprotein reductase activity;GO:0004517:nitric-oxide synthase activity;GO:0005102:receptor binding;GO:0005506:iron ion binding;GO:0005515:protein binding;GO:0005516:calmodulin binding;GO:0010181:FMN binding;GO:0020037:heme binding;GO:0034617:tetrahydrobiopterin binding;GO:0034618:arginine binding;GO:0042803:protein homodimerization activity;GO:0050660:flavin adenine dinucleotid…	K13241
ENSMUSG00000022871	185.728	-2.68015	0.159611	-16.7917	2.81e-63	9.37e-62	16	22918382	22939766	+	Fetub	fetuin beta [Source:MGI Symbol%3BAcc:MGI:1890221]	GO:0007338:single fertilization;GO:0007339:binding of sperm to zona pellucida;GO:0010951:negative regulation of endopeptidase activity;	GO:0005576:extracellular region;GO:0070062:extracellular exosome;	GO:0004869:cysteine-type endopeptidase inhibitor activity;GO:0008191:metalloendopeptidase inhibitor activity;	-
ENSMUSG00000042686	106.796	5.83585	0.347704	16.784	3.2e-63	1.07e-61	1	16964560	17097889	-	Jph1	junctophilin 1 [Source:MGI Symbol%3BAcc:MGI:1891495]	GO:0007517:muscle organ development;	GO:0005783:endoplasmic reticulum;GO:0005789:endoplasmic reticulum membrane;GO:0005886:plasma membrane;GO:0014701:junctional sarcoplasmic reticulum membrane;GO:0016021:integral component of membrane;GO:0016529:sarcoplasmic reticulum;GO:0030018:Z disc;GO:0030314:junctional membrane complex;	GO:0008307:structural constituent of muscle;	K19530
ENSMUSG00000017760	4033.15	-0.667874	0.039815	-16.7744	3.75e-63	1.25e-61	2	164832873	164841032	+	Ctsa	cathepsin A [Source:MGI Symbol%3BAcc:MGI:97748]	GO:0006508:proteolysis;GO:0031647:regulation of protein stability;GO:0051603:proteolysis involved in cellular protein catabolic process;	GO:0005654:nucleoplasm;GO:0005739:mitochondrion;GO:0005764:lysosome;GO:0016020:membrane;GO:0043231:intracellular membrane-bounded organelle;GO:0070062:extracellular exosome;	GO:0004185:serine-type carboxypeptidase activity;GO:0005515:protein binding;	K13289
ENSMUSG00000031548	118.276	3.50337	0.209227	16.7444	6.23e-63	2.07e-61	8	23411502	23449632	+	Sfrp1	secreted frizzled-related protein 1 [Source:MGI Symbol%3BAcc:MGI:892014]	GO:0001649:osteoblast differentiation;GO:0001657:ureteric bud development;GO:0001756:somitogenesis;GO:0001843:neural tube closure;GO:0002244:hematopoietic progenitor cell differentiation;GO:0006508:proteolysis;GO:0007186:G-protein coupled receptor signaling pathway;GO:0008284:positive regulation of cell proliferation;GO:0008285:negative regulation of cell proliferation;GO:0008584:male gonad devel…	GO:0005578:proteinaceous extracellular matrix;GO:0005615:extracellular space;GO:0005622:intracellular;GO:0005829:cytosol;GO:0005886:plasma membrane;GO:0009986:cell surface;GO:0016021:integral component of membrane;GO:0031012:extracellular matrix;GO:0070062:extracellular exosome;	GO:0004197:cysteine-type endopeptidase activity;GO:0004930:G-protein coupled receptor activity;GO:0005109:frizzled binding;GO:0005515:protein binding;GO:0008144:drug binding;GO:0008201:heparin binding;GO:0017147:Wnt-protein binding;GO:0042802:identical protein binding;GO:0042813:Wnt-activated receptor activity;	K02166
ENSMUSG00000046324	1640.86	-0.882942	0.0528068	-16.7202	9.34e-63	3.1e-61	19	29608214	29648415	-	Ermp1	endoplasmic reticulum metallopeptidase 1 [Source:MGI Symbol%3BAcc:MGI:106250]	GO:0006508:proteolysis;	GO:0005789:endoplasmic reticulum membrane;GO:0016020:membrane;GO:0016021:integral component of membrane;	GO:0003674:molecular_function;GO:0008237:metallopeptidase activity;GO:0046872:metal ion binding;	-
ENSMUSG00000054452	3125.35	0.74322	0.0444539	16.7189	9.55e-63	3.16e-61	10	81559488	81566362	+	Aes	amino-terminal enhancer of split [Source:MGI Symbol%3BAcc:MGI:95806]	GO:0000122:negative regulation of transcription from RNA polymerase II promoter;GO:0001501:skeletal system development;GO:0006351:transcription, DNA-templated;GO:0006357:regulation of transcription from RNA polymerase II promoter;GO:0010629:negative regulation of gene expression;GO:0016055:Wnt signaling pathway;GO:0031668:cellular response to extracellular stimulus;GO:0032091:negative regulation …	GO:0005634:nucleus;GO:0005654:nucleoplasm;	GO:0003714:transcription corepressor activity;GO:0005515:protein binding;	-
ENSMUSG00000021732	186.471	-2.62987	0.157312	-16.7176	9.76e-63	3.23e-61	13	118669791	118792115	+	Fgf10	fibroblast growth factor 10 [Source:MGI Symbol%3BAcc:MGI:1099809]	GO:0000132:establishment of mitotic spindle orientation;GO:0000187:activation of MAPK activity;GO:0001525:angiogenesis;GO:0001759:organ induction;GO:0001823:mesonephros development;GO:0001974:blood vessel remodeling;GO:0003338:metanephros morphogenesis;GO:0006935:chemotaxis;GO:0007267:cell-cell signaling;GO:0007368:determination of left/right symmetry;GO:0007431:salivary gland development;GO:0007…	GO:0005615:extracellular space;GO:0005634:nucleus;GO:0005886:plasma membrane;GO:0009986:cell surface;GO:0031012:extracellular matrix;	GO:0005104:fibroblast growth factor receptor binding;GO:0005111:type 2 fibroblast growth factor receptor binding;GO:0005515:protein binding;GO:0008083:growth factor activity;GO:0008201:heparin binding;GO:0042056:chemoattractant activity;	K04358
ENSMUSG00000074874	103.788	5.52254	0.330444	16.7125	1.06e-62	3.51e-61	13	60895351	60897447	-	Ctla2b	cytotoxic T lymphocyte-associated protein 2 beta [Source:MGI Symbol%3BAcc:MGI:88555]	GO:0006508:proteolysis;GO:0010951:negative regulation of endopeptidase activity;	-	GO:0004869:cysteine-type endopeptidase inhibitor activity;GO:0005515:protein binding;GO:0008234:cysteine-type peptidase activity;	-
ENSMUSG00000096188	3114.55	-0.802532	0.0480362	-16.7068	1.17e-62	3.85e-61	8	104348191	104395807	-	Cmtm4	CKLF-like MARVEL transmembrane domain containing 4 [Source:MGI Symbol%3BAcc:MGI:2142888]	GO:0006935:chemotaxis;GO:0008150:biological_process;	GO:0005615:extracellular space;GO:0016021:integral component of membrane;	GO:0003674:molecular_function;GO:0005125:cytokine activity;	-
ENSMUSG00000023830	3078.17	-0.981204	0.0587985	-16.6876	1.61e-62	5.31e-61	17	12682406	12769664	-	Igf2r	insulin-like growth factor 2 receptor [Source:MGI Symbol%3BAcc:MGI:96435]	GO:0001889:liver development;GO:0006810:transport;GO:0007186:G-protein coupled receptor signaling pathway;GO:0007283:spermatogenesis;GO:0009791:post-embryonic development;GO:0031100:organ regeneration;GO:0032526:response to retinoic acid;GO:0043065:positive regulation of apoptotic process;	GO:0005634:nucleus;GO:0005641:nuclear envelope lumen;GO:0005765:lysosomal membrane;GO:0005768:endosome;GO:0005769:early endosome;GO:0005770:late endosome;GO:0005794:Golgi apparatus;GO:0005802:trans-Golgi network;GO:0005886:plasma membrane;GO:0005925:focal adhesion;GO:0009986:cell surface;GO:0016020:membrane;GO:0016021:integral component of membrane;GO:0030118:clathrin coat;GO:0030139:endocytic ve…	GO:0001948:glycoprotein binding;GO:0001965:G-protein alpha-subunit binding;GO:0001972:retinoic acid binding;GO:0004930:G-protein coupled receptor activity;GO:0005215:transporter activity;GO:0005520:insulin-like growth factor binding;GO:0005537:mannose binding;GO:0019899:enzyme binding;GO:0031995:insulin-like growth factor II binding;GO:0042802:identical protein binding;GO:0051219:phosphoprotein b…	-
[truncated: 51,329 more rows]
