# Supplementary material
Source: Research Square preprint supplement (doi:10.21203/rs.3.rs-8962384/v1)
Supplement: Supplementary file 4 [file 8bbe66dc2c251d90bf58097e.xlsx]

## Sheet: Additional file1：Group_Traf6+2 
gene_id	baseMean	log2FoldChange	lfcSE	stat	pvalue	padj	Chr	Start	End	Strand	GeneSymbol	Description	GO_BP	GO_CC	GO_MF	KO
ENSMUSG00000061353	7136.97	3.6721	0.0955182	38.444	0	0	6	117168535	117181367	+	Cxcl12	chemokine (C-X-C motif) ligand 12 [Source:MGI Symbol%3BAcc:MGI:103556]	GO:0001569:patterning of blood vessels;GO:0001667:ameboidal-type cell migration;GO:0006952:defense response;GO:0006955:immune response;GO:0007281:germ cell development;GO:0007420:brain development;GO:0008045:motor neuron axon guidance;GO:0008354:germ cell migration;GO:0030334:regulation of cell migration;GO:0030335:positive regulation of cell migration;GO:0042098:T cell proliferation;GO:0045785:p…	GO:0009897:external side of plasma membrane;GO:0070062:extracellular exosome;	GO:0008009:chemokine activity;GO:0008083:growth factor activity;GO:0042056:chemoattractant activity;GO:0042379:chemokine receptor binding;GO:0045236:CXCR chemokine receptor binding;	K10031
ENSMUSG00000027750	1583.12	4.85701	0.130562	37.2008	6.63e-303	6.39e-299	3	54361109	54391037	+	Postn	periostin%2C osteoblast specific factor [Source:MGI Symbol%3BAcc:MGI:1926321]	GO:0001666:response to hypoxia;GO:0001953:negative regulation of cell-matrix adhesion;GO:0003073:regulation of systemic arterial blood pressure;GO:0007155:cell adhesion;GO:0008593:regulation of Notch signaling pathway;GO:0009612:response to mechanical stimulus;GO:0009888:tissue development;GO:0014850:response to muscle activity;GO:0014911:positive regulation of smooth muscle cell migration;GO:003…	GO:0005578:proteinaceous extracellular matrix;GO:0005615:extracellular space;GO:0005802:trans-Golgi network;GO:0031012:extracellular matrix;GO:0031594:neuromuscular junction;	GO:0008201:heparin binding;GO:0046872:metal ion binding;	-
ENSMUSG00000050335	8086.69	-7.78873	0.215104	-36.2092	4.36e-287	2.81e-283	14	47367751	47386160	+	Lgals3	lectin%2C galactose binding%2C soluble 3 [Source:MGI Symbol%3BAcc:MGI:96778]	GO:0001501:skeletal system development;GO:0002548:monocyte chemotaxis;GO:0006397:mRNA processing;GO:0006898:receptor-mediated endocytosis;GO:0008380:RNA splicing;GO:0030154:cell differentiation;GO:0030198:extracellular matrix organization;GO:0030593:neutrophil chemotaxis;GO:0042129:regulation of T cell proliferation;GO:0045087:innate immune response;GO:0045185:maintenance of protein location;GO:0…	GO:0001772:immunological synapse;GO:0005576:extracellular region;GO:0005578:proteinaceous extracellular matrix;GO:0005615:extracellular space;GO:0005634:nucleus;GO:0005681:spliceosomal complex;GO:0005737:cytoplasm;GO:0005743:mitochondrial inner membrane;GO:0009897:external side of plasma membrane;GO:0009986:cell surface;GO:0016020:membrane;GO:0031012:extracellular matrix;GO:0070062:extracellular …	GO:0003723:RNA binding;GO:0005515:protein binding;GO:0019863:IgE binding;GO:0030246:carbohydrate binding;GO:0042056:chemoattractant activity;GO:0043236:laminin binding;	K06831
ENSMUSG00000020950	1587.72	6.98403	0.213562	32.7026	1.44e-234	6.92e-231	12	49382660	49386861	+	Foxg1	forkhead box G1 [Source:MGI Symbol%3BAcc:MGI:1347464]	GO:0000122:negative regulation of transcription from RNA polymerase II promoter;GO:0002052:positive regulation of neuroblast proliferation;GO:0006351:transcription, DNA-templated;GO:0007346:regulation of mitotic cell cycle;GO:0009953:dorsal/ventral pattern formation;GO:0010468:regulation of gene expression;GO:0016199:axon midline choice point recognition;GO:0021852:pyramidal neuron migration;GO:0…	GO:0005634:nucleus;	GO:0000981:sequence-specific DNA binding RNA polymerase II transcription factor activity;GO:0001227:RNA polymerase II transcription regulatory region sequence-specific DNA binding transcription factor activity involved in negative regulation of transcription;GO:0005515:protein binding;GO:0043565:sequence-specific DNA binding;	K09385
ENSMUSG00000035493	797.419	5.0871	0.157941	32.2089	1.32e-227	5.1e-224	13	56609603	56639339	+	Tgfbi	transforming growth factor%2C beta induced [Source:MGI Symbol%3BAcc:MGI:99959]	GO:0001525:angiogenesis;GO:0002062:chondrocyte differentiation;GO:0007155:cell adhesion;GO:0008283:cell proliferation;GO:0030198:extracellular matrix organization;	GO:0005578:proteinaceous extracellular matrix;GO:0005604:basement membrane;GO:0005615:extracellular space;GO:0005802:trans-Golgi network;GO:0031012:extracellular matrix;GO:0070062:extracellular exosome;	GO:0005178:integrin binding;GO:0005518:collagen binding;GO:0050840:extracellular matrix binding;	K19519
ENSMUSG00000059336	818.899	4.87573	0.155396	31.3762	4.27e-216	1.37e-212	18	78100091	78142119	-	Slc14a1	solute carrier family 14 (urea transporter)%2C member 1 [Source:MGI Symbol%3BAcc:MGI:1351654]	GO:0006833:water transport;GO:0015840:urea transport;GO:0071918:urea transmembrane transport;	GO:0005730:nucleolus;GO:0005886:plasma membrane;GO:0005887:integral component of plasma membrane;GO:0016021:integral component of membrane;GO:0016323:basolateral plasma membrane;GO:0043231:intracellular membrane-bounded organelle;	GO:0005372:water transmembrane transporter activity;GO:0015204:urea transmembrane transporter activity;GO:0015265:urea channel activity;	K08716
ENSMUSG00000034205	833.416	5.05722	0.164227	30.7942	3.14e-208	8.65e-205	14	69609068	69695834	+	Loxl2	lysyl oxidase-like 2 [Source:MGI Symbol%3BAcc:MGI:2137913]	GO:0001666:response to hypoxia;GO:0001837:epithelial to mesenchymal transition;GO:0001935:endothelial cell proliferation;GO:0002040:sprouting angiogenesis;GO:0006351:transcription, DNA-templated;GO:0006464:cellular protein modification process;GO:0006898:receptor-mediated endocytosis;GO:0016570:histone modification;GO:0018277:protein deamination;GO:0030199:collagen fibril organization;GO:0032332:…	GO:0005604:basement membrane;GO:0005615:extracellular space;GO:0005634:nucleus;GO:0005654:nucleoplasm;GO:0005694:chromosome;GO:0016020:membrane;GO:0031012:extracellular matrix;	GO:0003682:chromatin binding;GO:0003714:transcription corepressor activity;GO:0004720:protein-lysine 6-oxidase activity;GO:0005044:scavenger receptor activity;GO:0005507:copper ion binding;GO:0035064:methylated histone binding;GO:0070492:oligosaccharide binding;	K00280
ENSMUSG00000063011	2466.72	3.02216	0.098673	30.6281	5.18e-206	1.25e-202	17	25748614	25754327	-	Msln	mesothelin [Source:MGI Symbol%3BAcc:MGI:1888992]	GO:0007160:cell-matrix adhesion;GO:0031016:pancreas development;	GO:0005615:extracellular space;GO:0005794:Golgi apparatus;GO:0005886:plasma membrane;GO:0009986:cell surface;GO:0031225:anchored component of membrane;	GO:0005515:protein binding;	K20733
ENSMUSG00000047139	1273.57	7.62905	0.255919	29.8104	2.86e-195	6.13e-192	10	43578284	43584265	+	Cd24a	CD24a antigen [Source:MGI Symbol%3BAcc:MGI:88323]	-	-	-	K06469
ENSMUSG00000026981	847.619	4.72711	0.160586	29.4367	1.87e-190	3.6e-187	2	24336853	24351494	+	Il1rn	interleukin 1 receptor antagonist [Source:MGI Symbol%3BAcc:MGI:96547]	GO:0001660:fever generation;GO:0006629:lipid metabolic process;GO:0006953:acute-phase response;GO:0006955:immune response;GO:0019221:cytokine-mediated signaling pathway;GO:0030073:insulin secretion;GO:0034115:negative regulation of heterotypic cell-cell adhesion;GO:0051384:response to glucocorticoid;GO:2000660:negative regulation of interleukin-1-mediated signaling pathway;	GO:0005576:extracellular region;GO:0005615:extracellular space;GO:0005737:cytoplasm;GO:0031982:vesicle;GO:0070062:extracellular exosome;	GO:0005125:cytokine activity;GO:0005149:interleukin-1 receptor binding;GO:0005150:interleukin-1, Type I receptor binding;GO:0005151:interleukin-1, Type II receptor binding;GO:0005152:interleukin-1 receptor antagonist activity;GO:0045352:interleukin-1 Type I receptor antagonist activity;GO:0045353:interleukin-1 Type II receptor antagonist activity;	K05481
ENSMUSG00000027800	1220.3	-6.89731	0.238963	-28.8635	3.43e-183	6.02e-180	3	57285611	57301988	-	Tm4sf1	transmembrane 4 superfamily member 1 [Source:MGI Symbol%3BAcc:MGI:104678]	-	GO:0005887:integral component of plasma membrane;GO:0016021:integral component of membrane;	-	-
ENSMUSG00000039883	659.126	5.1958	0.180803	28.7373	1.3e-181	2.1e-178	5	21543559	21575904	+	Lrrc17	leucine rich repeat containing 17 [Source:MGI Symbol%3BAcc:MGI:1921761]	GO:0001649:osteoblast differentiation;GO:0033687:osteoblast proliferation;GO:0045671:negative regulation of osteoclast differentiation;GO:0048539:bone marrow development;	GO:0005615:extracellular space;	GO:0003674:molecular_function;	-
ENSMUSG00000019139	626.683	-4.71819	0.167123	-28.2319	2.37e-175	3.52e-172	8	70594373	70597290	+	Isyna1	myo-inositol 1-phosphate synthase A1 [Source:MGI Symbol%3BAcc:MGI:1919030]	GO:0006021:inositol biosynthetic process;GO:0008654:phospholipid biosynthetic process;	GO:0005737:cytoplasm;	GO:0004512:inositol-3-phosphate synthase activity;	K01858
ENSMUSG00000026822	844.319	-5.67145	0.201609	-28.131	4.09e-174	5.64e-171	2	32384633	32388252	-	Lcn2	lipocalin 2 [Source:MGI Symbol%3BAcc:MGI:96757]	GO:0006811:ion transport;GO:0006879:cellular iron ion homeostasis;GO:0009615:response to virus;GO:0009635:response to herbicide;GO:0010046:response to mycotoxin;GO:0010628:positive regulation of gene expression;GO:0015891:siderophore transport;GO:0031346:positive regulation of cell projection organization;GO:0031669:cellular response to nutrient levels;GO:0042493:response to drug;GO:0045087:innat…	GO:0005576:extracellular region;GO:0005615:extracellular space;GO:0005829:cytosol;GO:0070062:extracellular exosome;	GO:0002020:protease binding;GO:0005215:transporter activity;GO:0005506:iron ion binding;GO:0005515:protein binding;GO:0036094:small molecule binding;GO:0042803:protein homodimerization activity;	K21129
ENSMUSG00000025993	787.103	6.72919	0.241935	27.8141	2.93e-170	3.77e-167	1	45908068	45926523	-	Slc40a1	solute carrier family 40 (iron-regulated transporter)%2C member 1 [Source:MGI Symbol%3BAcc:MGI:1315204]	GO:0002260:lymphocyte homeostasis;GO:0003158:endothelium development;GO:0006826:iron ion transport;GO:0006879:cellular iron ion homeostasis;GO:0034395:regulation of transcription from RNA polymerase II promoter in response to iron;GO:0034755:iron ion transmembrane transport;GO:0043066:negative regulation of apoptotic process;GO:0045944:positive regulation of transcription from RNA polymerase II p…	GO:0005622:intracellular;GO:0005654:nucleoplasm;GO:0005829:cytosol;GO:0005886:plasma membrane;GO:0008021:synaptic vesicle;GO:0016021:integral component of membrane;GO:0016323:basolateral plasma membrane;	GO:0004872:receptor activity;GO:0005381:iron ion transmembrane transporter activity;GO:0005515:protein binding;GO:0015093:ferrous iron transmembrane transporter activity;GO:0017046:peptide hormone binding;GO:0097689:iron channel activity;	-
ENSMUSG00000029838	6609.94	4.87557	0.175844	27.7267	3.33e-169	4.02e-166	6	36714929	36810220	-	Ptn	pleiotrophin [Source:MGI Symbol%3BAcc:MGI:97804]	GO:0001503:ossification;GO:0001889:liver development;GO:0007507:heart development;GO:0007612:learning;GO:0008284:positive regulation of cell proliferation;GO:0008360:regulation of cell shape;GO:0010811:positive regulation of cell-substrate adhesion;GO:0010976:positive regulation of neuron projection development;GO:0014823:response to activity;GO:0016525:negative regulation of angiogenesis;GO:0021…	GO:0005578:proteinaceous extracellular matrix;GO:0005604:basement membrane;GO:0005615:extracellular space;GO:0005783:endoplasmic reticulum;GO:0009986:cell surface;GO:0016020:membrane;GO:0031594:neuromuscular junction;GO:0043234:protein complex;GO:0048471:perinuclear region of cytoplasm;	GO:0008083:growth factor activity;GO:0008201:heparin binding;GO:0019901:protein kinase binding;GO:0035373:chondroitin sulfate proteoglycan binding;GO:0035374:chondroitin sulfate binding;GO:0038085:vascular endothelial growth factor binding;	K16642
ENSMUSG00000026185	2518.05	9.7331	0.353427	27.5392	5.97e-167	6.77e-164	1	72857932	72874884	-	Igfbp5	insulin-like growth factor binding protein 5 [Source:MGI Symbol%3BAcc:MGI:96440]	GO:0001558:regulation of cell growth;GO:0001649:osteoblast differentiation;GO:0006006:glucose metabolic process;GO:0007565:female pregnancy;GO:0007568:aging;GO:0010906:regulation of glucose metabolic process;GO:0014912:negative regulation of smooth muscle cell migration;GO:0017148:negative regulation of translation;GO:0030336:negative regulation of cell migration;GO:0031069:hair follicle morphoge…	GO:0005622:intracellular;GO:0016942:insulin-like growth factor binding protein complex;GO:0042567:insulin-like growth factor ternary complex;	GO:0001968:fibronectin binding;GO:0031994:insulin-like growth factor I binding;GO:0031995:insulin-like growth factor II binding;	-
ENSMUSG00000024423	5509.08	2.4149	0.0890373	27.1224	5.37e-162	5.75e-159	18	12972252	12992948	+	Impact	impact%2C RWD domain protein [Source:MGI Symbol%3BAcc:MGI:1098233]	GO:0000122:negative regulation of transcription from RNA polymerase II promoter;GO:0001933:negative regulation of protein phosphorylation;GO:0006446:regulation of translational initiation;GO:0031333:negative regulation of protein complex assembly;GO:0031953:negative regulation of protein autophosphorylation;GO:0034198:cellular response to amino acid starvation;GO:0042149:cellular response to gluc…	GO:0005737:cytoplasm;GO:0005844:polysome;	GO:0003779:actin binding;GO:0005515:protein binding;GO:0043022:ribosome binding;	-
ENSMUSG00000031502	3200.68	4.84312	0.179297	27.0117	1.08e-160	1.09e-157	8	11198423	11312826	-	Col4a1	collagen%2C type IV%2C alpha 1 [Source:MGI Symbol%3BAcc:MGI:88454]	GO:0001569:patterning of blood vessels;GO:0007420:brain development;GO:0007528:neuromuscular junction development;GO:0030198:extracellular matrix organization;GO:0030855:epithelial cell differentiation;GO:0038063:collagen-activated tyrosine kinase receptor signaling pathway;GO:0048514:blood vessel morphogenesis;GO:0061304:retinal blood vessel morphogenesis;GO:0061333:renal tubule morphogenesis;GO…	GO:0005576:extracellular region;GO:0005587:collagen type IV trimer;GO:0005604:basement membrane;GO:0005615:extracellular space;GO:0031012:extracellular matrix;	GO:0005201:extracellular matrix structural constituent;GO:0048407:platelet-derived growth factor binding;	K06237
ENSMUSG00000024087	3800.07	3.58269	0.135056	26.5275	4.67e-155	4.51e-152	17	79706953	79715041	-	Cyp1b1	cytochrome P450%2C family 1%2C subfamily b%2C polypeptide 1 [Source:MGI Symbol%3BAcc:MGI:88590]	GO:0001525:angiogenesis;GO:0002930:trabecular meshwork development;GO:0006725:cellular aromatic compound metabolic process;GO:0006805:xenobiotic metabolic process;GO:0006809:nitric oxide biosynthetic process;GO:0007155:cell adhesion;GO:0008202:steroid metabolic process;GO:0008210:estrogen metabolic process;GO:0008285:negative regulation of cell proliferation;GO:0008631:intrinsic apoptotic signali…	GO:0005739:mitochondrion;GO:0005789:endoplasmic reticulum membrane;GO:0031090:organelle membrane;	GO:0004497:monooxygenase activity;GO:0005506:iron ion binding;GO:0016712:oxidoreductase activity, acting on paired donors, with incorporation or reduction of molecular oxygen, reduced flavin or flavoprotein as one donor, and incorporation of one atom of oxygen;GO:0020037:heme binding;GO:0070330:aromatase activity;	K07410
ENSMUSG00000003617	1864.14	-3.89026	0.155134	-25.0768	8.91e-139	8.18e-136	3	19957054	20009145	+	Cp	ceruloplasmin [Source:MGI Symbol%3BAcc:MGI:88476]	GO:0006825:copper ion transport;GO:0006879:cellular iron ion homeostasis;GO:0055114:oxidation-reduction process;	GO:0005615:extracellular space;GO:0005765:lysosomal membrane;GO:0070062:extracellular exosome;GO:0072562:blood microparticle;	GO:0004322:ferroxidase activity;GO:0005507:copper ion binding;GO:0051087:chaperone binding;	K13624
ENSMUSG00000023092	549.948	3.70161	0.148441	24.9366	2.98e-137	2.62e-134	X	56731787	56793346	+	Fhl1	four and a half LIM domains 1 [Source:MGI Symbol%3BAcc:MGI:1298387]	GO:0003254:regulation of membrane depolarization;GO:0007275:multicellular organismal development;GO:0010972:negative regulation of G2/M transition of mitotic cell cycle;GO:0030154:cell differentiation;GO:0030308:negative regulation of cell growth;GO:0043268:positive regulation of potassium ion transport;GO:1901016:regulation of potassium ion transmembrane transporter activity;GO:2000134:negative …	GO:0005634:nucleus;GO:0005737:cytoplasm;GO:0005829:cytosol;GO:0005886:plasma membrane;GO:0005925:focal adhesion;	GO:0044325:ion channel binding;GO:0046872:metal ion binding;	K14365
ENSMUSG00000057469	495.115	3.83799	0.154181	24.8928	8.9e-137	7.47e-134	12	16810963	16839742	+	E2f6	E2F transcription factor 6 [Source:MGI Symbol%3BAcc:MGI:1354159]	GO:0000083:regulation of transcription involved in G1/S transition of mitotic cell cycle;GO:0000122:negative regulation of transcription from RNA polymerase II promoter;GO:0006351:transcription, DNA-templated;	GO:0005634:nucleus;GO:0005662:DNA replication factor A complex;GO:0005730:nucleolus;GO:0071339:MLL1 complex;GO:0090575:RNA polymerase II transcription factor complex;	GO:0000977:RNA polymerase II regulatory region sequence-specific DNA binding;GO:0001227:RNA polymerase II transcription regulatory region sequence-specific DNA binding transcription factor activity involved in negative regulation of transcription;GO:0003677:DNA binding;GO:0003700:sequence-specific DNA binding transcription factor activity;GO:0046983:protein dimerization activity;	K09390
ENSMUSG00000024521	531.173	5.40686	0.222254	24.3273	1.01e-130	8.09e-128	18	66458604	66465550	+	Pmaip1	phorbol-12-myristate-13-acetate-induced protein 1 [Source:MGI Symbol%3BAcc:MGI:1930146]	GO:0001836:release of cytochrome c from mitochondria;GO:0006915:apoptotic process;GO:0006919:activation of cysteine-type endopeptidase activity involved in apoptotic process;GO:0006974:cellular response to DNA damage stimulus;GO:0008630:intrinsic apoptotic signaling pathway in response to DNA damage;GO:0009411:response to UV;GO:0010165:response to X-ray;GO:0010917:negative regulation of mitochond…	GO:0005739:mitochondrion;	GO:0005515:protein binding;	K10131
ENSMUSG00000031503	2008.36	5.1059	0.210671	24.2364	9.19e-130	7.09e-127	8	11312805	11449287	+	Col4a2	collagen%2C type IV%2C alpha 2 [Source:MGI Symbol%3BAcc:MGI:88455]	GO:0001525:angiogenesis;GO:0006351:transcription, DNA-templated;GO:0016525:negative regulation of angiogenesis;GO:0030198:extracellular matrix organization;GO:0035987:endodermal cell differentiation;GO:0038063:collagen-activated tyrosine kinase receptor signaling pathway;GO:0071560:cellular response to transforming growth factor beta stimulus;	GO:0005576:extracellular region;GO:0005587:collagen type IV trimer;GO:0005604:basement membrane;GO:0005615:extracellular space;GO:0031012:extracellular matrix;GO:0070062:extracellular exosome;	GO:0005201:extracellular matrix structural constituent;	-
ENSMUSG00000022324	1112.14	2.28217	0.0943316	24.1931	2.63e-129	1.95e-126	15	34306680	34436242	+	Matn2	matrilin 2 [Source:MGI Symbol%3BAcc:MGI:109613]	GO:0001764:neuron migration;GO:0007411:axon guidance;GO:0008347:glial cell migration;GO:0031104:dendrite regeneration;GO:0031175:neuron projection development;GO:0048678:response to axon injury;	GO:0005578:proteinaceous extracellular matrix;GO:0005604:basement membrane;GO:0005615:extracellular space;GO:0031012:extracellular matrix;	GO:0005509:calcium ion binding;	-
ENSMUSG00000048758	2077.07	-5.45048	0.225496	-24.171	4.49e-129	3.21e-126	9	106429454	106431568	+	Rpl29	ribosomal protein L29 [Source:MGI Symbol%3BAcc:MGI:99687]	GO:0002181:cytoplasmic translation;GO:0006412:translation;GO:0008283:cell proliferation;GO:0031589:cell-substrate adhesion;GO:0035264:multicellular organism growth;	GO:0019898:extrinsic component of membrane;GO:0022625:cytosolic large ribosomal subunit;GO:0022626:cytosolic ribosome;GO:0042788:polysomal ribosome;	GO:0003735:structural constituent of ribosome;GO:0008201:heparin binding;	K02905
ENSMUSG00000021728	694.51	-2.62969	0.111193	-23.6498	1.19e-123	8.17e-121	13	117220625	117274098	+	Emb	embigin [Source:MGI Symbol%3BAcc:MGI:95321]	GO:0035879:plasma membrane lactate transport;	GO:0005887:integral component of plasma membrane;GO:0030054:cell junction;GO:0045202:synapse;	-	-
ENSMUSG00000046532	729.199	-3.73723	0.161242	-23.1778	7.63e-119	5.08e-116	X	98148769	98323215	+	Ar	androgen receptor [Source:MGI Symbol%3BAcc:MGI:88064]	GO:0000122:negative regulation of transcription from RNA polymerase II promoter;GO:0001701:in utero embryonic development;GO:0003073:regulation of systemic arterial blood pressure;GO:0003382:epithelial cell morphogenesis;GO:0006351:transcription, DNA-templated;GO:0006355:regulation of transcription, DNA-templated;GO:0006357:regulation of transcription from RNA polymerase II promoter;GO:0006366:tr…	GO:0000790:nuclear chromatin;GO:0005634:nucleus;GO:0005737:cytoplasm;GO:0005886:plasma membrane;GO:0016607:nuclear speck;GO:0043234:protein complex;	GO:0000978:RNA polymerase II core promoter proximal region sequence-specific DNA binding;GO:0001077:RNA polymerase II core promoter proximal region sequence-specific DNA binding transcription factor activity involved in positive regulation of transcription;GO:0001085:RNA polymerase II transcription factor binding;GO:0003682:chromatin binding;GO:0003700:sequence-specific DNA binding transcription …	K08557
ENSMUSG00000017969	858.747	8.79619	0.382955	22.9693	9.46e-117	6.08e-114	2	167191805	167240604	-	Ptgis	prostaglandin I2 (prostacyclin) synthase [Source:MGI Symbol%3BAcc:MGI:1097156]	GO:0001516:prostaglandin biosynthetic process;GO:0007566:embryo implantation;GO:0032088:negative regulation of NF-kappaB transcription factor activity;GO:0035360:positive regulation of peroxisome proliferator activated receptor signaling pathway;GO:0042981:regulation of apoptotic process;GO:0045019:negative regulation of nitric oxide biosynthetic process;GO:0045766:positive regulation of angiogen…	GO:0005615:extracellular space;GO:0005634:nucleus;GO:0005737:cytoplasm;GO:0005783:endoplasmic reticulum;GO:0005789:endoplasmic reticulum membrane;GO:0005901:caveola;GO:0016021:integral component of membrane;	GO:0004497:monooxygenase activity;GO:0005506:iron ion binding;GO:0008116:prostaglandin-I synthase activity;GO:0016705:oxidoreductase activity, acting on paired donors, with incorporation or reduction of molecular oxygen;GO:0020037:heme binding;	K01831
ENSMUSG00000025348	491.401	3.4063	0.149135	22.8405	1.82e-115	1.13e-112	10	128933818	128958282	+	Itga7	integrin alpha 7 [Source:MGI Symbol%3BAcc:MGI:102700]	GO:0007155:cell adhesion;GO:0007229:integrin-mediated signaling pathway;GO:0008360:regulation of cell shape;GO:0016477:cell migration;GO:0034113:heterotypic cell-cell adhesion;GO:0048514:blood vessel morphogenesis;	GO:0005737:cytoplasm;GO:0005927:muscle tendon junction;GO:0031594:neuromuscular junction;GO:0034677:integrin alpha7-beta1 complex;GO:0042383:sarcolemma;	GO:0005515:protein binding;GO:0043236:laminin binding;GO:0046872:metal ion binding;	K06583
ENSMUSG00000034463	413.618	5.41058	0.238876	22.6502	1.39e-113	8.37e-111	14	65919395	65953744	-	Scara3	scavenger receptor class A%2C member 3 [Source:MGI Symbol%3BAcc:MGI:2444418]	-	GO:0000139:Golgi membrane;GO:0005581:collagen trimer;GO:0005783:endoplasmic reticulum;GO:0005789:endoplasmic reticulum membrane;GO:0016021:integral component of membrane;	-	-
ENSMUSG00000010476	356.185	5.77212	0.2551	22.6269	2.36e-113	1.38e-110	7	137193673	137314445	-	Ebf3	early B cell factor 3 [Source:MGI Symbol%3BAcc:MGI:894289]	GO:0006366:transcription from RNA polymerase II promoter;GO:0007275:multicellular organismal development;GO:0045893:positive regulation of transcription, DNA-templated;GO:0045944:positive regulation of transcription from RNA polymerase II promoter;	GO:0005634:nucleus;	GO:0000978:RNA polymerase II core promoter proximal region sequence-specific DNA binding;GO:0001077:RNA polymerase II core promoter proximal region sequence-specific DNA binding transcription factor activity involved in positive regulation of transcription;GO:0005515:protein binding;GO:0046872:metal ion binding;	K09103
ENSMUSG00000042834	606.744	4.22214	0.18741	22.5289	2.16e-112	1.23e-109	18	33437019	33464029	-	Nrep	neuronal regeneration related protein [Source:MGI Symbol%3BAcc:MGI:99444]	GO:0017015:regulation of transforming growth factor beta receptor signaling pathway;GO:0031103:axon regeneration;GO:0045664:regulation of neuron differentiation;	GO:0005634:nucleus;GO:0005737:cytoplasm;	GO:0005515:protein binding;	-
ENSMUSG00000022484	609.075	-2.80279	0.126602	-22.1386	1.34e-108	7.4e-106	15	102966796	102971893	+	Hoxc10	homeobox C10 [Source:MGI Symbol%3BAcc:MGI:96192]	GO:0001501:skeletal system development;GO:0006366:transcription from RNA polymerase II promoter;GO:0009952:anterior/posterior pattern specification;GO:0009954:proximal/distal pattern formation;GO:0021520:spinal cord motor neuron cell fate specification;GO:0030326:embryonic limb morphogenesis;GO:0045944:positive regulation of transcription from RNA polymerase II promoter;GO:0050905:neuromuscular p…	GO:0016604:nuclear body;GO:0019907:cyclin-dependent protein kinase activating kinase holoenzyme complex;	GO:0000977:RNA polymerase II regulatory region sequence-specific DNA binding;GO:0001228:RNA polymerase II transcription regulatory region sequence-specific DNA binding transcription factor activity involved in positive regulation of transcription;	K17444
ENSMUSG00000021070	615.31	-6.88231	0.312279	-22.039	1.22e-107	6.53e-105	12	105563226	105595237	+	Bdkrb2	bradykinin receptor%2C beta 2 [Source:MGI Symbol%3BAcc:MGI:102845]	GO:0006939:smooth muscle contraction;GO:0007186:G-protein coupled receptor signaling pathway;GO:0009651:response to salt stress;GO:0033137:negative regulation of peptidyl-serine phosphorylation;GO:0042310:vasoconstriction;GO:0042311:vasodilation;GO:0050482:arachidonic acid secretion;GO:1902219:negative regulation of intrinsic apoptotic signaling pathway in response to osmotic stress;GO:1902239:ne…	GO:0005768:endosome;GO:0005886:plasma membrane;GO:0016021:integral component of membrane;	GO:0002020:protease binding;GO:0004947:bradykinin receptor activity;GO:0031702:type 1 angiotensin receptor binding;GO:0046982:protein heterodimerization activity;	K03916
ENSMUSG00000061232	625.669	-3.4213	0.157361	-21.7417	8.28e-105	4.32e-102	17	33996017	34000333	-	H2-K1	histocompatibility 2%2C K1%2C K region [Source:MGI Symbol%3BAcc:MGI:95904]	GO:0001916:positive regulation of T cell mediated cytotoxicity;GO:0002474:antigen processing and presentation of peptide antigen via MHC class I;GO:0002485:antigen processing and presentation of endogenous peptide antigen via MHC class I via ER pathway, TAP-dependent;GO:0006955:immune response;GO:0010977:negative regulation of neuron projection development;GO:0042590:antigen processing and presen…	GO:0005783:endoplasmic reticulum;GO:0005794:Golgi apparatus;GO:0005797:Golgi medial cisterna;GO:0009897:external side of plasma membrane;GO:0009986:cell surface;GO:0016020:membrane;GO:0030670:phagocytic vesicle membrane;GO:0042612:MHC class I protein complex;GO:0070062:extracellular exosome;GO:0070971:endoplasmic reticulum exit site;GO:0071556:integral component of lumenal side of endoplasmic ret…	GO:0003723:RNA binding;GO:0005102:receptor binding;GO:0005515:protein binding;GO:0030881:beta-2-microglobulin binding;GO:0042605:peptide antigen binding;GO:0042608:T cell receptor binding;GO:0046977:TAP binding;	K06751
ENSMUSG00000026068	371.03	4.47412	0.207215	21.5917	2.15e-103	1.09e-100	1	40515362	40551705	+	Il18rap	interleukin 18 receptor accessory protein [Source:MGI Symbol%3BAcc:MGI:1338888]	GO:0019221:cytokine-mediated signaling pathway;GO:0070301:cellular response to hydrogen peroxide;	GO:0016021:integral component of membrane;	GO:0004908:interleukin-1 receptor activity;	-
ENSMUSG00000015709	478.214	5.63813	0.261446	21.5652	3.81e-103	1.89e-100	7	84246278	84410176	-	Arnt2	aryl hydrocarbon receptor nuclear translocator 2 [Source:MGI Symbol%3BAcc:MGI:107188]	GO:0001666:response to hypoxia;GO:0001701:in utero embryonic development;GO:0006355:regulation of transcription, DNA-templated;GO:0006366:transcription from RNA polymerase II promoter;GO:0007165:signal transduction;GO:0007417:central nervous system development;GO:0007420:brain development;GO:0008284:positive regulation of cell proliferation;GO:0009410:response to xenobiotic stimulus;GO:0009636:re…	GO:0005634:nucleus;GO:0005667:transcription factor complex;GO:0005737:cytoplasm;	GO:0000978:RNA polymerase II core promoter proximal region sequence-specific DNA binding;GO:0000981:sequence-specific DNA binding RNA polymerase II transcription factor activity;GO:0001077:RNA polymerase II core promoter proximal region sequence-specific DNA binding transcription factor activity involved in positive regulation of transcription;GO:0003677:DNA binding;GO:0003700:sequence-specific D…	K15589
ENSMUSG00000029816	3865.07	1.99106	0.0928181	21.4512	4.45e-102	2.15e-99	6	49036546	49070929	+	Gpnmb	glycoprotein (transmembrane) nmb [Source:MGI Symbol%3BAcc:MGI:1934765]	GO:0001649:osteoblast differentiation;GO:0001818:negative regulation of cytokine production;GO:0001934:positive regulation of protein phosphorylation;GO:0007155:cell adhesion;GO:0007165:signal transduction;GO:0007267:cell-cell signaling;GO:0030282:bone mineralization;GO:0030335:positive regulation of cell migration;GO:0031954:positive regulation of protein autophosphorylation;GO:0032720:negative …	GO:0005887:integral component of plasma membrane;GO:0012505:endomembrane system;GO:0016021:integral component of membrane;GO:0030659:cytoplasmic vesicle membrane;GO:0031410:cytoplasmic vesicle;GO:0042470:melanosome;	GO:0005178:integrin binding;GO:0008201:heparin binding;GO:0045545:syndecan binding;GO:0048018:receptor agonist activity;	K20732
ENSMUSG00000002265	374.29	6.40637	0.299702	21.3758	2.24e-101	1.06e-98	7	6703892	6730431	-	Peg3	paternally expressed 3 [Source:MGI Symbol%3BAcc:MGI:104748]	GO:0000122:negative regulation of transcription from RNA polymerase II promoter;GO:0006351:transcription, DNA-templated;GO:0006915:apoptotic process;GO:0010468:regulation of gene expression;GO:0045944:positive regulation of transcription from RNA polymerase II promoter;	GO:0005634:nucleus;GO:0005776:autophagosome;	GO:0003676:nucleic acid binding;GO:0003700:sequence-specific DNA binding transcription factor activity;GO:0046872:metal ion binding;	-
ENSMUSG00000022636	1128.98	2.57123	0.121069	21.2377	4.29e-100	1.97e-97	16	52248996	52454074	-	Alcam	activated leukocyte cell adhesion molecule [Source:MGI Symbol%3BAcc:MGI:1313266]	GO:0002250:adaptive immune response;GO:0007155:cell adhesion;GO:0007157:heterophilic cell-cell adhesion via plasma membrane cell adhesion molecules;GO:0007411:axon guidance;GO:0008045:motor neuron axon guidance;GO:0031290:retinal ganglion cell axon guidance;GO:0048846:axon extension involved in axon guidance;GO:1990138:neuron projection extension;	GO:0001772:immunological synapse;GO:0005887:integral component of plasma membrane;GO:0005925:focal adhesion;GO:0009897:external side of plasma membrane;GO:0030424:axon;GO:0030425:dendrite;GO:0031226:intrinsic component of plasma membrane;GO:0042101:T cell receptor complex;GO:0043025:neuronal cell body;GO:0070062:extracellular exosome;	GO:0005515:protein binding;	K06547
ENSMUSG00000062168	357.933	6.68473	0.315234	21.2056	8.48e-100	3.8e-97	X	160623094	160735765	-	Ppef1	protein phosphatase with EF hand calcium-binding domain 1 [Source:MGI Symbol%3BAcc:MGI:1097157]	GO:0006470:protein dephosphorylation;GO:0050906:detection of stimulus involved in sensory perception;	-	GO:0004722:protein serine/threonine phosphatase activity;GO:0005506:iron ion binding;GO:0005509:calcium ion binding;GO:0030145:manganese ion binding;	-
ENSMUSG00000029377	8684.45	-2.54053	0.120647	-21.0576	1.95e-98	8.54e-96	5	91074622	91093646	+	Ereg	epiregulin [Source:MGI Symbol%3BAcc:MGI:107508]	GO:0001525:angiogenesis;GO:0001550:ovarian cumulus expansion;GO:0001556:oocyte maturation;GO:0001819:positive regulation of cytokine production;GO:0007143:female meiotic division;GO:0007173:epidermal growth factor receptor signaling pathway;GO:0007267:cell-cell signaling;GO:0008284:positive regulation of cell proliferation;GO:0008285:negative regulation of cell proliferation;GO:0009299:mRNA trans…	GO:0005615:extracellular space;GO:0005886:plasma membrane;GO:0016021:integral component of membrane;	GO:0005154:epidermal growth factor receptor binding;GO:0008083:growth factor activity;	K09784
ENSMUSG00000026389	788.779	3.04731	0.144997	21.0164	4.64e-98	1.99e-95	1	120190757	120272705	-	Steap3	STEAP family member 3 [Source:MGI Symbol%3BAcc:MGI:1915678]	GO:0006826:iron ion transport;GO:0006915:apoptotic process;GO:0007049:cell cycle;GO:0009306:protein secretion;GO:0015677:copper ion import;GO:0055072:iron ion homeostasis;GO:0055114:oxidation-reduction process;GO:0098706:ferric iron import across plasma membrane;GO:1902167:positive regulation of intrinsic apoptotic signaling pathway in response to DNA damage by p53 class mediator;GO:1990182:exoso…	GO:0005737:cytoplasm;GO:0005768:endosome;GO:0005771:multivesicular body;GO:0005886:plasma membrane;GO:0005887:integral component of plasma membrane;GO:0010008:endosome membrane;	GO:0000293:ferric-chelate reductase activity;GO:0005515:protein binding;GO:0008823:cupric reductase activity;GO:0046872:metal ion binding;GO:0052851:ferric-chelate reductase (NADPH) activity;	K10142;K06988
ENSMUSG00000040026	959.439	-5.09942	0.243018	-20.9837	9.24e-98	3.87e-95	7	46711998	46715700	-	Saa3	serum amyloid A 3 [Source:MGI Symbol%3BAcc:MGI:98223]	GO:0006953:acute-phase response;GO:0007252:I-kappaB phosphorylation;GO:0035634:response to stilbenoid;GO:0050918:positive chemotaxis;GO:0060326:cell chemotaxis;GO:0071347:cellular response to interleukin-1;	GO:0005615:extracellular space;GO:0005622:intracellular;GO:0034364:high-density lipoprotein particle;	GO:0035662:Toll-like receptor 4 binding;GO:0042056:chemoattractant activity;	K17310
ENSMUSG00000017002	598.325	-7.25225	0.346384	-20.937	2.46e-97	1.01e-94	2	164354070	164389095	-	Slpi	secretory leukocyte peptidase inhibitor [Source:MGI Symbol%3BAcc:MGI:109297]	GO:0006955:immune response;GO:0010951:negative regulation of endopeptidase activity;GO:0019731:antibacterial humoral response;GO:0032091:negative regulation of protein binding;GO:0032496:response to lipopolysaccharide;GO:0035821:modification of morphology or physiology of other organism;GO:0045071:negative regulation of viral genome replication;GO:0045087:innate immune response;	GO:0005615:extracellular space;GO:0005794:Golgi apparatus;GO:0031012:extracellular matrix;GO:0070062:extracellular exosome;	GO:0003677:DNA binding;GO:0003729:mRNA binding;GO:0004867:serine-type endopeptidase inhibitor activity;GO:0019899:enzyme binding;	-
ENSMUSG00000067608	672.378	4.50578	0.215226	20.9351	2.57e-97	1.03e-94	19	9283238	9284494	+	Pcna-ps2	proliferating cell nuclear antigen pseudogene 2 [Source:MGI Symbol%3BAcc:MGI:97505]	GO:0006260:DNA replication;GO:0006275:regulation of DNA replication;	GO:0005634:nucleus;	GO:0003677:DNA binding;GO:0030337:DNA polymerase processivity factor activity;	K04802
ENSMUSG00000033538	705.361	-3.05844	0.146336	-20.9002	5.34e-97	2.1e-94	9	5308828	5336783	+	Casp4	caspase 4%2C apoptosis-related cysteine peptidase [Source:MGI Symbol%3BAcc:MGI:107700]	GO:0006508:proteolysis;GO:0006954:inflammatory response;GO:0007015:actin filament organization;GO:0021762:substantia nigra development;GO:0035234:ectopic germ cell programmed cell death;GO:0042981:regulation of apoptotic process;GO:0045087:innate immune response;GO:0050718:positive regulation of interleukin-1 beta secretion;GO:0050727:regulation of inflammatory response;GO:0070059:intrinsic apopt…	GO:0005576:extracellular region;GO:0005739:mitochondrion;GO:0005783:endoplasmic reticulum;GO:0005789:endoplasmic reticulum membrane;GO:0005829:cytosol;GO:0005886:plasma membrane;GO:0043005:neuron projection;GO:0043025:neuronal cell body;GO:0072557:IPAF inflammasome complex;GO:0072558:NLRP1 inflammasome complex;GO:0072559:NLRP3 inflammasome complex;GO:0097169:AIM2 inflammasome complex;	GO:0008233:peptidase activity;GO:0097110:scaffold protein binding;GO:0097153:cysteine-type endopeptidase activity involved in apoptotic process;GO:0097200:cysteine-type endopeptidase activity involved in execution phase of apoptosis;	-
ENSMUSG00000038463	338.857	3.33351	0.159554	20.8926	6.25e-97	2.41e-94	1	170644532	170682789	+	Olfml2b	olfactomedin-like 2B [Source:MGI Symbol%3BAcc:MGI:2443310]	GO:0030198:extracellular matrix organization;	GO:0005578:proteinaceous extracellular matrix;GO:0005615:extracellular space;	GO:0050840:extracellular matrix binding;	-
ENSMUSG00000053219	267.236	4.71101	0.226954	20.7576	1.05e-95	3.96e-93	10	22158569	22374139	+	Raet1e	retinoic acid early transcript 1E [Source:MGI Symbol%3BAcc:MGI:2675273]	GO:0001913:T cell mediated cytotoxicity;GO:0008150:biological_process;GO:0042267:natural killer cell mediated cytotoxicity;	GO:0005886:plasma membrane;GO:0046658:anchored component of plasma membrane;	GO:0046703:natural killer cell lectin-like receptor binding;	K07987
ENSMUSG00000032715	2279.46	-2.26749	0.109833	-20.6449	1.09e-94	4.03e-92	2	152337422	152344032	-	Trib3	tribbles pseudokinase 3 [Source:MGI Symbol%3BAcc:MGI:1345675]	GO:0000122:negative regulation of transcription from RNA polymerase II promoter;GO:0006351:transcription, DNA-templated;GO:0006468:protein phosphorylation;GO:0006469:negative regulation of protein kinase activity;GO:0010827:regulation of glucose transport;GO:0032092:positive regulation of protein binding;GO:0032436:positive regulation of proteasomal ubiquitin-dependent protein catabolic process;G…	GO:0005634:nucleus;GO:0005730:nucleolus;GO:0031965:nuclear membrane;	GO:0003714:transcription corepressor activity;GO:0004860:protein kinase inhibitor activity;GO:0005515:protein binding;GO:0005524:ATP binding;GO:0016301:kinase activity;GO:0019899:enzyme binding;GO:0019901:protein kinase binding;GO:0031434:mitogen-activated protein kinase kinase binding;GO:0031625:ubiquitin protein ligase binding;GO:0055106:ubiquitin-protein transferase regulator activity;	K19518
ENSMUSG00000097906	312.344	-5.18603	0.253581	-20.4512	5.87e-93	2.14e-90	13	67810246	67811200	+	Gm9625	predicted gene 9625 [Source:MGI Symbol%3BAcc:MGI:3780033]	-	-	-	K02941
ENSMUSG00000034855	307.941	-3.78371	0.185763	-20.3685	3.18e-92	1.14e-89	5	92346638	92348889	-	Cxcl10	chemokine (C-X-C motif) ligand 10 [Source:MGI Symbol%3BAcc:MGI:1352450]	GO:0002690:positive regulation of leukocyte chemotaxis;GO:0006935:chemotaxis;GO:0006954:inflammatory response;GO:0006955:immune response;GO:0007186:G-protein coupled receptor signaling pathway;GO:0008284:positive regulation of cell proliferation;GO:0009409:response to cold;GO:0010332:response to gamma radiation;GO:0010818:T cell chemotaxis;GO:0010819:regulation of T cell chemotaxis;GO:0010996:res…	GO:0005576:extracellular region;GO:0005615:extracellular space;GO:0009897:external side of plasma membrane;	GO:0008009:chemokine activity;GO:0008201:heparin binding;GO:0048248:CXCR3 chemokine receptor binding;	-
ENSMUSG00000030255	313.164	3.76883	0.185429	20.3249	7.74e-92	2.71e-89	6	145931641	145965223	+	Sspn	sarcospan [Source:MGI Symbol%3BAcc:MGI:1353511]	-	GO:0005887:integral component of plasma membrane;GO:0016010:dystrophin-associated glycoprotein complex;GO:0030054:cell junction;GO:0030133:transport vesicle;GO:0042383:sarcolemma;GO:0045211:postsynaptic membrane;	-	-
ENSMUSG00000016918	391.077	7.24106	0.356447	20.3146	9.56e-92	3.29e-89	1	12692277	12861192	+	Sulf1	sulfatase 1 [Source:MGI Symbol%3BAcc:MGI:2138563]	GO:0001502:cartilage condensation;GO:0001822:kidney development;GO:0001937:negative regulation of endothelial cell proliferation;GO:0002063:chondrocyte development;GO:0003094:glomerular filtration;GO:0006790:sulfur compound metabolic process;GO:0006915:apoptotic process;GO:0007155:cell adhesion;GO:0010575:positive regulation of vascular endothelial growth factor production;GO:0014846:esophagus sm…	GO:0005615:extracellular space;GO:0005783:endoplasmic reticulum;GO:0005794:Golgi apparatus;GO:0005795:Golgi stack;GO:0005886:plasma membrane;GO:0009986:cell surface;GO:0045121:membrane raft;	GO:0004065:arylsulfatase activity;GO:0005509:calcium ion binding;GO:0008449:N-acetylglucosamine-6-sulfatase activity;	K14607
ENSMUSG00000074743	266.708	5.69681	0.282794	20.1447	2.99e-90	1.01e-87	2	148404466	148408188	-	Thbd	thrombomodulin [Source:MGI Symbol%3BAcc:MGI:98736]	GO:0007165:signal transduction;GO:0007565:female pregnancy;GO:0007596:blood coagulation;GO:0010165:response to X-ray;GO:0030195:negative regulation of blood coagulation;GO:0032496:response to lipopolysaccharide;GO:0050819:negative regulation of coagulation;GO:0051591:response to cAMP;	GO:0005615:extracellular space;GO:0005774:vacuolar membrane;GO:0005886:plasma membrane;GO:0005887:integral component of plasma membrane;GO:0009986:cell surface;GO:0016327:apicolateral plasma membrane;	GO:0004888:transmembrane signaling receptor activity;GO:0005509:calcium ion binding;	K03907
ENSMUSG00000027827	665.323	3.41853	0.169937	20.1165	5.29e-90	1.76e-87	3	65109384	65378223	+	Kcnab1	potassium voltage-gated channel%2C shaker-related subfamily%2C beta member 1 [Source:MGI Symbol%3BAcc:MGI:109155]	GO:0007420:brain development;GO:0007507:heart development;GO:0007519:skeletal muscle tissue development;GO:0007611:learning or memory;GO:0045445:myoblast differentiation;GO:0055114:oxidation-reduction process;GO:0060539:diaphragm development;GO:0071805:potassium ion transmembrane transport;GO:1901016:regulation of potassium ion transmembrane transporter activity;GO:1901379:regulation of potassium…	GO:0005829:cytosol;GO:0008076:voltage-gated potassium channel complex;GO:0031234:extrinsic component of cytoplasmic side of plasma membrane;GO:0032839:dendrite cytoplasm;GO:0034705:potassium channel complex;GO:0043204:perikaryon;GO:0044224:juxtaparanode region of axon;GO:1990635:proximal dendrite;	GO:0004033:aldo-keto reductase (NADP) activity;GO:0005249:voltage-gated potassium channel activity;GO:0005515:protein binding;GO:0015459:potassium channel regulator activity;GO:0019904:protein domain specific binding;GO:0044325:ion channel binding;GO:0070402:NADPH binding;	K04882
ENSMUSG00000016262	782.847	2.3508	0.117452	20.015	4.08e-89	1.33e-86	1	192844488	192855756	-	Sertad4	SERTA domain containing 4 [Source:MGI Symbol%3BAcc:MGI:2443496]	GO:0008150:biological_process;	GO:0005575:cellular_component;GO:0005634:nucleus;	GO:0003674:molecular_function;	-
ENSMUSG00000021684	253.461	4.13004	0.206412	20.0087	4.62e-89	1.49e-86	13	95024454	95250336	-	Pde8b	phosphodiesterase 8B [Source:MGI Symbol%3BAcc:MGI:2443999]	GO:0001662:behavioral fear response;GO:0006198:cAMP catabolic process;GO:0007165:signal transduction;GO:0008542:visual learning;GO:0035106:operant conditioning;GO:0050885:neuromuscular process controlling balance;GO:0090032:negative regulation of steroid hormone biosynthetic process;	GO:0005575:cellular_component;	GO:0004115:3',5'-cyclic-AMP phosphodiesterase activity;GO:0046872:metal ion binding;	K18437;K01120
ENSMUSG00000000275	317.672	-6.58193	0.329173	-19.9953	6.05e-89	1.91e-86	11	88999376	89020293	+	Trim25	tripartite motif-containing 25 [Source:MGI Symbol%3BAcc:MGI:102749]	GO:0006513:protein monoubiquitination;GO:0030433:ER-associated ubiquitin-dependent protein catabolic process;GO:0033280:response to vitamin D;GO:0036503:ERAD pathway;GO:0042787:protein ubiquitination involved in ubiquitin-dependent protein catabolic process;GO:0043123:positive regulation of I-kappaB kinase/NF-kappaB signaling;GO:0043627:response to estrogen;GO:0045087:innate immune response;GO:00…	GO:0005654:nucleoplasm;GO:0005737:cytoplasm;GO:0005829:cytosol;GO:0016604:nuclear body;	GO:0003723:RNA binding;GO:0004842:ubiquitin-protein transferase activity;GO:0016874:ligase activity;GO:0045296:cadherin binding;GO:0046872:metal ion binding;GO:1904264:ubiquitin protein ligase activity involved in ERAD pathway;	K10652
ENSMUSG00000054675	633.617	2.31088	0.115742	19.9658	1.09e-88	3.4e-86	5	113793729	113800516	-	Tmem119	transmembrane protein 119 [Source:MGI Symbol%3BAcc:MGI:2385228]	GO:0001649:osteoblast differentiation;GO:0007283:spermatogenesis;GO:0030501:positive regulation of bone mineralization;GO:0031214:biomineral tissue development;GO:0033690:positive regulation of osteoblast proliferation;GO:0045669:positive regulation of osteoblast differentiation;GO:0048515:spermatid differentiation;GO:1903012:positive regulation of bone development;	GO:0005783:endoplasmic reticulum;GO:0005789:endoplasmic reticulum membrane;GO:0005886:plasma membrane;GO:0016021:integral component of membrane;	GO:0005515:protein binding;	-
ENSMUSG00000030671	346.956	-3.78969	0.190084	-19.9369	1.95e-88	5.96e-86	7	114415281	114539251	+	Pde3b	phosphodiesterase 3B%2C cGMP-inhibited [Source:MGI Symbol%3BAcc:MGI:1333863]	GO:0001525:angiogenesis;GO:0007162:negative regulation of cell adhesion;GO:0007165:signal transduction;GO:0016525:negative regulation of angiogenesis;GO:0031018:endocrine pancreas development;GO:0032869:cellular response to insulin stimulus;GO:0042593:glucose homeostasis;GO:0050796:regulation of insulin secretion;GO:0050995:negative regulation of lipid catabolic process;	GO:0005783:endoplasmic reticulum;GO:0005794:Golgi apparatus;GO:0005829:cytosol;GO:0016020:membrane;GO:0016021:integral component of membrane;GO:0032045:guanyl-nucleotide exchange factor complex;	GO:0004114:3',5'-cyclic-nucleotide phosphodiesterase activity;GO:0043422:protein kinase B binding;GO:0046872:metal ion binding;	K13296
ENSMUSG00000057262	428.447	4.64609	0.233642	19.8855	5.43e-88	1.64e-85	15	52477614	52478228	-	Gm10020	predicted pseudogene 10020 [Source:MGI Symbol%3BAcc:MGI:3642192]	GO:0002181:cytoplasmic translation;	GO:0022625:cytosolic large ribosomal subunit;	GO:0003723:RNA binding;GO:0003735:structural constituent of ribosome;	K02877
ENSMUSG00000024924	2645.48	1.88261	0.0946934	19.8811	5.93e-88	1.76e-85	19	27216484	27254231	+	Vldlr	very low density lipoprotein receptor [Source:MGI Symbol%3BAcc:MGI:98935]	GO:0000122:negative regulation of transcription from RNA polymerase II promoter;GO:0006869:lipid transport;GO:0006898:receptor-mediated endocytosis;GO:0008203:cholesterol metabolic process;GO:0021517:ventral spinal cord development;GO:0034436:glycoprotein transport;GO:0034447:very-low-density lipoprotein particle clearance;GO:0038026:reelin-mediated signaling pathway;GO:0045860:positive regulatio…	GO:0005615:extracellular space;GO:0005905:coated pit;GO:0016020:membrane;GO:0016021:integral component of membrane;GO:0034361:very-low-density lipoprotein particle;GO:0043235:receptor complex;	GO:0001948:glycoprotein binding;GO:0005509:calcium ion binding;GO:0005515:protein binding;GO:0030229:very-low-density lipoprotein particle receptor activity;GO:0034185:apolipoprotein binding;GO:0034189:very-low-density lipoprotein particle binding;GO:0034437:glycoprotein transporter activity;GO:0038025:reelin receptor activity;GO:0048306:calcium-dependent protein binding;	K20053
ENSMUSG00000048218	226.732	-4.24087	0.214022	-19.8151	2.2e-87	6.44e-85	15	97244074	97247287	-	Amigo2	adhesion molecule with Ig like domain 2 [Source:MGI Symbol%3BAcc:MGI:2145995]	GO:0007155:cell adhesion;GO:0007156:homophilic cell adhesion via plasma membrane adhesion molecules;GO:0007157:heterophilic cell-cell adhesion via plasma membrane cell adhesion molecules;GO:0043066:negative regulation of apoptotic process;GO:0043069:negative regulation of programmed cell death;GO:0051965:positive regulation of synapse assembly;	GO:0005634:nucleus;GO:0005886:plasma membrane;GO:0016021:integral component of membrane;	GO:0003674:molecular_function;	-
ENSMUSG00000063632	346.343	7.07736	0.358367	19.7489	8.19e-87	2.36e-84	12	27334264	27342574	-	Sox11	SRY (sex determining region Y)-box 11 [Source:MGI Symbol%3BAcc:MGI:98359]	GO:0000122:negative regulation of transcription from RNA polymerase II promoter;GO:0001501:skeletal system development;GO:0001822:kidney development;GO:0001841:neural tube formation;GO:0002089:lens morphogenesis in camera-type eye;GO:0003151:outflow tract morphogenesis;GO:0003211:cardiac ventricle formation;GO:0003357:noradrenergic neuron differentiation;GO:0006366:transcription from RNA polymera…	GO:0005634:nucleus;GO:0005737:cytoplasm;	GO:0000976:transcription regulatory region sequence-specific DNA binding;GO:0000979:RNA polymerase II core promoter sequence-specific DNA binding;GO:0001077:RNA polymerase II core promoter proximal region sequence-specific DNA binding transcription factor activity involved in positive regulation of transcription;GO:0001105:RNA polymerase II transcription coactivator activity;GO:0001158:enhancer s…	K09268
ENSMUSG00000061758	323.375	3.68078	0.186979	19.6855	2.87e-86	8.14e-84	6	34384218	34396950	+	Akr1b10	aldo-keto reductase family 1%2C member B10 (aldose reductase) [Source:MGI Symbol%3BAcc:MGI:1915111]	GO:0055114:oxidation-reduction process;	GO:0005739:mitochondrion;	GO:0016491:oxidoreductase activity;	K00085
ENSMUSG00000032348	1008.93	3.39299	0.172748	19.6412	6.87e-86	1.92e-83	9	78182774	78209349	+	Gsta4	glutathione S-transferase%2C alpha 4 [Source:MGI Symbol%3BAcc:MGI:1309515]	GO:0006749:glutathione metabolic process;GO:0006805:xenobiotic metabolic process;GO:0009635:response to herbicide;GO:0010043:response to zinc ion;GO:0035094:response to nicotine;GO:0071285:cellular response to lithium ion;	GO:0005739:mitochondrion;	GO:0004364:glutathione transferase activity;GO:0008144:drug binding;GO:0043295:glutathione binding;	K00799
ENSMUSG00000043943	232.787	4.77792	0.243668	19.6083	1.31e-85	3.62e-83	9	18321951	18402995	-	Naalad2	N-acetylated alpha-linked acidic dipeptidase 2 [Source:MGI Symbol%3BAcc:MGI:1919810]	GO:0006508:proteolysis;GO:0042135:neurotransmitter catabolic process;	GO:0005886:plasma membrane;GO:0016021:integral component of membrane;	GO:0004180:carboxypeptidase activity;GO:0008233:peptidase activity;GO:0008237:metallopeptidase activity;GO:0016805:dipeptidase activity;GO:0046872:metal ion binding;GO:0050129:N-formylglutamate deformylase activity;	K01301
ENSMUSG00000026235	257.615	5.49525	0.280269	19.6071	1.35e-85	3.66e-83	1	77367185	77515088	-	Epha4	Eph receptor A4 [Source:MGI Symbol%3BAcc:MGI:98277]	GO:0007155:cell adhesion;GO:0007411:axon guidance;GO:0007628:adult walking behavior;GO:0008045:motor neuron axon guidance;GO:0008347:glial cell migration;GO:0010977:negative regulation of neuron projection development;GO:0018108:peptidyl-tyrosine phosphorylation;GO:0021957:corticospinal tract morphogenesis;GO:0043087:regulation of GTPase activity;GO:0043507:positive regulation of JUN kinase activ…	GO:0005737:cytoplasm;GO:0005741:mitochondrial outer membrane;GO:0005783:endoplasmic reticulum;GO:0005794:Golgi apparatus;GO:0005886:plasma membrane;GO:0005887:integral component of plasma membrane;GO:0009986:cell surface;GO:0014069:postsynaptic density;GO:0030054:cell junction;GO:0030175:filopodium;GO:0030424:axon;GO:0030425:dendrite;GO:0031594:neuromuscular junction;GO:0031901:early endosome mem…	GO:0004672:protein kinase activity;GO:0005004:GPI-linked ephrin receptor activity;GO:0005005:transmembrane-ephrin receptor activity;GO:0005515:protein binding;GO:0005524:ATP binding;GO:0042731:PH domain binding;GO:0042802:identical protein binding;GO:0046875:ephrin receptor binding;GO:0097161:DH domain binding;	K05105
ENSMUSG00000046027	474.911	-2.56633	0.131068	-19.5802	2.28e-85	6.11e-83	7	83631959	83653127	+	Stard5	StAR-related lipid transfer (START) domain containing 5 [Source:MGI Symbol%3BAcc:MGI:2156765]	GO:0070508:cholesterol import;	GO:0005739:mitochondrion;	GO:0015485:cholesterol binding;GO:0017127:cholesterol transporter activity;GO:0032052:bile acid binding;	-
ENSMUSG00000022265	2710.46	1.78563	0.0912475	19.5691	2.84e-85	7.49e-83	15	27466677	27594909	+	Ank	progressive ankylosis [Source:MGI Symbol%3BAcc:MGI:3045421]	-	-	-	-
ENSMUSG00000055301	1240.09	-2.24347	0.114777	-19.5464	4.42e-85	1.15e-82	3	138217760	138233382	+	Adh7	alcohol dehydrogenase 7 (class IV)%2C mu or sigma polypeptide [Source:MGI Symbol%3BAcc:MGI:87926]	GO:0001523:retinoid metabolic process;GO:0006068:ethanol catabolic process;GO:0006069:ethanol oxidation;GO:0009617:response to bacterium;GO:0010430:fatty acid omega-oxidation;GO:0042572:retinol metabolic process;GO:0042573:retinoic acid metabolic process;GO:0045471:response to ethanol;GO:0055114:oxidation-reduction process;GO:1900116:extracellular negative regulation of signal transduction;	GO:0005576:extracellular region;GO:0005622:intracellular;GO:0005829:cytosol;GO:0005886:plasma membrane;	GO:0004022:alcohol dehydrogenase (NAD) activity;GO:0004024:alcohol dehydrogenase activity, zinc-dependent;GO:0004031:aldehyde oxidase activity;GO:0004745:retinol dehydrogenase activity;GO:0008270:zinc ion binding;GO:0016491:oxidoreductase activity;GO:0019841:retinol binding;GO:0035276:ethanol binding;GO:0048019:receptor antagonist activity;	K13951
ENSMUSG00000001504	917.277	-2.15756	0.111294	-19.3861	1.01e-83	2.6e-81	13	72628820	72634198	+	Irx2	Iroquois related homeobox 2 (Drosophila) [Source:MGI Symbol%3BAcc:MGI:1197526]	GO:0000122:negative regulation of transcription from RNA polymerase II promoter;GO:0001656:metanephros development;GO:0072086:specification of loop of Henle identity;GO:0072272:proximal/distal pattern formation involved in metanephric nephron development;	GO:0005634:nucleus;	GO:0043565:sequence-specific DNA binding;	-
ENSMUSG00000025931	223.091	4.39474	0.22802	19.2734	8.98e-83	2.28e-80	1	20890606	20939650	+	Paqr8	progestin and adipoQ receptor family member VIII [Source:MGI Symbol%3BAcc:MGI:1921479]	GO:0007275:multicellular organismal development;GO:0043401:steroid hormone mediated signaling pathway;GO:0048477:oogenesis;GO:0048545:response to steroid hormone;	GO:0005794:Golgi apparatus;GO:0005886:plasma membrane;GO:0016021:integral component of membrane;	GO:0003707:steroid hormone receptor activity;GO:0005496:steroid binding;	-
ENSMUSG00000028023	364.693	7.5487	0.393632	19.1771	5.76e-82	1.44e-79	3	129199878	129219591	+	Pitx2	paired-like homeodomain transcription factor 2 [Source:MGI Symbol%3BAcc:MGI:109340]	GO:0000122:negative regulation of transcription from RNA polymerase II promoter;GO:0001569:patterning of blood vessels;GO:0001570:vasculogenesis;GO:0001701:in utero embryonic development;GO:0001764:neuron migration;GO:0002074:extraocular skeletal muscle development;GO:0003171:atrioventricular valve development;GO:0003253:cardiac neural crest cell migration involved in outflow tract morphogenesis;…	GO:0005634:nucleus;GO:0005667:transcription factor complex;GO:0005737:cytoplasm;	GO:0000976:transcription regulatory region sequence-specific DNA binding;GO:0000978:RNA polymerase II core promoter proximal region sequence-specific DNA binding;GO:0000981:sequence-specific DNA binding RNA polymerase II transcription factor activity;GO:0001077:RNA polymerase II core promoter proximal region sequence-specific DNA binding transcription factor activity involved in positive regulati…	K04686
ENSMUSG00000030772	226.809	-4.18675	0.219545	-19.0702	4.47e-81	1.1e-78	7	112116017	112159057	-	Dkk3	dickkopf WNT signaling pathway inhibitor 3 [Source:MGI Symbol%3BAcc:MGI:1354952]	GO:0007275:multicellular organismal development;GO:0016055:Wnt signaling pathway;GO:0032348:negative regulation of aldosterone biosynthetic process;GO:0045892:negative regulation of transcription, DNA-templated;GO:0090090:negative regulation of canonical Wnt signaling pathway;GO:2000065:negative regulation of cortisol biosynthetic process;	GO:0005576:extracellular region;GO:0005615:extracellular space;	-	-
ENSMUSG00000040133	335.528	-2.75527	0.14504	-18.9966	1.82e-80	4.44e-78	2	118277110	118373419	-	Gpr176	G protein-coupled receptor 176 [Source:MGI Symbol%3BAcc:MGI:2685858]	GO:0007186:G-protein coupled receptor signaling pathway;GO:0008150:biological_process;GO:0030818:negative regulation of cAMP biosynthetic process;GO:0048512:circadian behavior;	GO:0005575:cellular_component;GO:0005886:plasma membrane;GO:0016021:integral component of membrane;	GO:0003674:molecular_function;GO:0004930:G-protein coupled receptor activity;	K08442
ENSMUSG00000037206	478.887	2.61787	0.137907	18.9828	2.36e-80	5.7e-78	9	58156268	58204306	-	Islr	immunoglobulin superfamily containing leucine-rich repeat [Source:MGI Symbol%3BAcc:MGI:1349645]	GO:0007155:cell adhesion;	GO:0005615:extracellular space;GO:0070062:extracellular exosome;	-	-
ENSMUSG00000020467	249.309	-6.35078	0.334865	-18.9652	3.31e-80	7.87e-78	11	28853204	28926743	+	Efemp1	epidermal growth factor-containing fibulin-like extracellular matrix protein 1 [Source:MGI Symbol%3BAcc:MGI:1339998]	GO:0006355:regulation of transcription, DNA-templated;GO:0007173:epidermal growth factor receptor signaling pathway;GO:0018108:peptidyl-tyrosine phosphorylation;GO:0032331:negative regulation of chondrocyte differentiation;GO:0043010:camera-type eye development;GO:0048048:embryonic eye morphogenesis;GO:0048050:post-embryonic eye morphogenesis;	GO:0005578:proteinaceous extracellular matrix;GO:0005615:extracellular space;GO:0031012:extracellular matrix;GO:0070062:extracellular exosome;	GO:0005006:epidermal growth factor-activated receptor activity;GO:0005154:epidermal growth factor receptor binding;GO:0005509:calcium ion binding;GO:0008083:growth factor activity;	-
ENSMUSG00000070056	366.816	-2.65396	0.140121	-18.9405	5.29e-80	1.24e-77	8	35587798	35679449	+	Mfhas1	malignant fibrous histiocytoma amplified sequence 1 [Source:MGI Symbol%3BAcc:MGI:1098644]	GO:0007165:signal transduction;GO:0007264:small GTPase mediated signal transduction;	GO:0005575:cellular_component;GO:0005622:intracellular;GO:0005886:plasma membrane;	GO:0003674:molecular_function;GO:0005525:GTP binding;	-
ENSMUSG00000071847	1033.39	3.28853	0.173683	18.9341	5.98e-80	1.39e-77	18	62922327	62953195	+	Apcdd1	adenomatosis polyposis coli down-regulated 1 [Source:MGI Symbol%3BAcc:MGI:3513977]	GO:0001942:hair follicle development;GO:0016055:Wnt signaling pathway;GO:0030178:negative regulation of Wnt signaling pathway;GO:0043615:astrocyte cell migration;	GO:0005887:integral component of plasma membrane;	GO:0017147:Wnt-protein binding;	-
ENSMUSG00000030654	1360.55	2.13951	0.113814	18.7983	7.8e-79	1.79e-76	7	118118891	118129662	-	Arl6ip1	ADP-ribosylation factor-like 6 interacting protein 1 [Source:MGI Symbol%3BAcc:MGI:1858943]	GO:0002038:positive regulation of L-glutamate transport;GO:0006613:cotranslational protein targeting to membrane;GO:0006915:apoptotic process;GO:0043066:negative regulation of apoptotic process;GO:0043154:negative regulation of cysteine-type endopeptidase activity involved in apoptotic process;GO:0071787:endoplasmic reticulum tubular network assembly;	GO:0005737:cytoplasm;GO:0005783:endoplasmic reticulum;GO:0005784:Sec61 translocon complex;GO:0005789:endoplasmic reticulum membrane;GO:0005829:cytosol;GO:0016020:membrane;GO:0016021:integral component of membrane;GO:0030176:integral component of endoplasmic reticulum membrane;	GO:0005515:protein binding;GO:0042802:identical protein binding;	-
ENSMUSG00000079259	290.932	3.47674	0.185438	18.7488	1.98e-78	4.49e-76	9	114507133	114564369	-	Trim71	tripartite motif-containing 71 [Source:MGI Symbol%3BAcc:MGI:2685973]	GO:0000082:G1/S transition of mitotic cell cycle;GO:0001843:neural tube closure;GO:0008543:fibroblast growth factor receptor signaling pathway;GO:0010586:miRNA metabolic process;GO:0017148:negative regulation of translation;GO:0021915:neural tube development;GO:0035278:negative regulation of translation involved in gene silencing by miRNA;GO:0051246:regulation of protein metabolic process;GO:0051…	GO:0000932:cytoplasmic mRNA processing body;	GO:0004842:ubiquitin-protein transferase activity;GO:0005515:protein binding;GO:0008270:zinc ion binding;GO:0030371:translation repressor activity;GO:0035198:miRNA binding;GO:0061630:ubiquitin protein ligase activity;	K12035
ENSMUSG00000031586	216.758	-4.19019	0.223596	-18.74	2.33e-78	5.24e-76	8	33782643	33929863	-	Rbpms	RNA binding protein gene with multiple splicing [Source:MGI Symbol%3BAcc:MGI:1334446]	GO:0000398:mRNA splicing, via spliceosome;GO:0006351:transcription, DNA-templated;GO:0006355:regulation of transcription, DNA-templated;GO:0006979:response to oxidative stress;GO:0010862:positive regulation of pathway-restricted SMAD protein phosphorylation;GO:0060391:positive regulation of SMAD protein import into nucleus;	GO:0000932:cytoplasmic mRNA processing body;GO:0005654:nucleoplasm;GO:0005685:U1 snRNP;GO:0005829:cytosol;GO:0010494:cytoplasmic stress granule;	GO:0003713:transcription coactivator activity;GO:0003723:RNA binding;GO:0008143:poly(A) binding;GO:0030619:U1 snRNA binding;GO:0035614:snRNA stem-loop binding;GO:0042803:protein homodimerization activity;	-
ENSMUSG00000068744	292.517	3.40613	0.183845	18.5271	1.25e-76	2.77e-74	3	108383839	108388231	+	Psrc1	proline/serine-rich coiled-coil 1 [Source:MGI Symbol%3BAcc:MGI:1913099]	GO:0001578:microtubule bundle formation;GO:0007080:mitotic metaphase plate congression;GO:0009987:cellular process;GO:0030308:negative regulation of cell growth;GO:0031116:positive regulation of microtubule polymerization;GO:0045737:positive regulation of cyclin-dependent protein serine/threonine kinase activity;GO:0045893:positive regulation of transcription, DNA-templated;GO:0051301:cell divisi…	GO:0000922:spindle pole;GO:0005654:nucleoplasm;GO:0005737:cytoplasm;GO:0005819:spindle;GO:0005829:cytosol;GO:0005876:spindle microtubule;GO:0015630:microtubule cytoskeleton;GO:0030496:midbody;	GO:0005515:protein binding;GO:0008017:microtubule binding;	K21443
ENSMUSG00000026315	212.312	5.52743	0.299299	18.4679	3.74e-76	8.2e-74	1	107590006	107610484	+	Serpinb8	serine (or cysteine) peptidase inhibitor%2C clade B%2C member 8 [Source:MGI Symbol%3BAcc:MGI:894657]	GO:0010951:negative regulation of endopeptidase activity;GO:0090136:epithelial cell-cell adhesion;	GO:0005615:extracellular space;GO:0005737:cytoplasm;GO:0005829:cytosol;GO:0070062:extracellular exosome;	GO:0004867:serine-type endopeptidase inhibitor activity;	K13965
ENSMUSG00000004626	456.469	-2.4905	0.134911	-18.4603	4.31e-76	9.34e-74	8	3630955	3643644	+	Stxbp2	syntaxin binding protein 2 [Source:MGI Symbol%3BAcc:MGI:107370]	GO:0001909:leukocyte mediated cytotoxicity;GO:0006887:exocytosis;GO:0006904:vesicle docking involved in exocytosis;GO:0015031:protein transport;GO:0043312:neutrophil degranulation;	GO:0005829:cytosol;GO:0005886:plasma membrane;GO:0016324:apical plasma membrane;GO:0031201:SNARE complex;GO:0042581:specific granule;GO:0042582:azurophil granule;GO:0042589:zymogen granule membrane;GO:0044194:cytolytic granule;GO:0070062:extracellular exosome;GO:0070820:tertiary granule;	GO:0005515:protein binding;GO:0017075:syntaxin-1 binding;GO:0019905:syntaxin binding;GO:0030348:syntaxin-3 binding;	K15300
ENSMUSG00000021226	939.929	-2.12014	0.115665	-18.33	4.77e-75	1.02e-72	12	83987861	83993873	+	Acot2	acyl-CoA thioesterase 2 [Source:MGI Symbol%3BAcc:MGI:2159605]	GO:0000038:very long-chain fatty acid metabolic process;GO:0001676:long-chain fatty acid metabolic process;GO:0006631:fatty acid metabolic process;GO:0006637:acyl-CoA metabolic process;	GO:0005739:mitochondrion;GO:0005759:mitochondrial matrix;GO:0070062:extracellular exosome;	GO:0005102:receptor binding;GO:0016290:palmitoyl-CoA hydrolase activity;GO:0047617:acyl-CoA hydrolase activity;GO:0052689:carboxylic ester hydrolase activity;	K01068
ENSMUSG00000062380	261.844	-3.19129	0.175547	-18.1791	7.55e-74	1.6e-71	8	123411424	123422015	+	Tubb3	tubulin%2C beta 3 class III [Source:MGI Symbol%3BAcc:MGI:107813]	GO:0000278:mitotic cell cycle;GO:0007010:cytoskeleton organization;GO:0007017:microtubule-based process;GO:0007411:axon guidance;	GO:0005622:intracellular;GO:0005634:nucleus;GO:0005737:cytoplasm;GO:0005874:microtubule;GO:0015630:microtubule cytoskeleton;GO:0030424:axon;GO:0030425:dendrite;GO:0043025:neuronal cell body;GO:0070062:extracellular exosome;GO:0071944:cell periphery;	GO:0003924:GTPase activity;GO:0005200:structural constituent of cytoskeleton;GO:0005515:protein binding;GO:0005525:GTP binding;GO:0042277:peptide binding;	K07375
ENSMUSG00000038210	241.334	-6.63559	0.365219	-18.1688	9.11e-74	1.91e-71	6	52242106	52245810	-	Hoxa11	homeobox A11 [Source:MGI Symbol%3BAcc:MGI:96172]	GO:0001501:skeletal system development;GO:0001656:metanephros development;GO:0001658:branching involved in ureteric bud morphogenesis;GO:0001759:organ induction;GO:0006351:transcription, DNA-templated;GO:0007275:multicellular organismal development;GO:0007283:spermatogenesis;GO:0007338:single fertilization;GO:0007501:mesodermal cell fate specification;GO:0008584:male gonad development;GO:0009952:…	GO:0005654:nucleoplasm;GO:0005667:transcription factor complex;GO:0032993:protein-DNA complex;GO:0043234:protein complex;	GO:0003677:DNA binding;GO:0005515:protein binding;GO:0043565:sequence-specific DNA binding;	K21951
ENSMUSG00000047996	314.364	7.60726	0.420229	18.1027	3.04e-73	6.3e-71	X	78449613	78583896	-	Prrg1	proline rich Gla (G-carboxyglutamic acid) 1 [Source:MGI Symbol%3BAcc:MGI:1917364]	GO:0008150:biological_process;	GO:0005575:cellular_component;GO:0005576:extracellular region;GO:0016021:integral component of membrane;	GO:0003674:molecular_function;GO:0005509:calcium ion binding;	-
ENSMUSG00000029119	216.081	4.88023	0.270303	18.0547	7.25e-73	1.49e-70	5	36806921	36830653	-	Man2b2	mannosidase 2%2C alpha B2 [Source:MGI Symbol%3BAcc:MGI:1195262]	GO:0006013:mannose metabolic process;GO:0006517:protein deglycosylation;	GO:0005615:extracellular space;GO:0070062:extracellular exosome;	GO:0004559:alpha-mannosidase activity;GO:0030246:carbohydrate binding;GO:0046872:metal ion binding;	K12312
ENSMUSG00000034777	286.251	-6.64594	0.370026	-17.9607	3.96e-72	8.03e-70	6	83711264	83738313	+	Vax2	ventral anterior homeobox 2 [Source:MGI Symbol%3BAcc:MGI:1346018]	GO:0000122:negative regulation of transcription from RNA polymerase II promoter;GO:0006351:transcription, DNA-templated;GO:0007409:axonogenesis;GO:0007601:visual perception;GO:0009950:dorsal/ventral axis specification;GO:0016055:Wnt signaling pathway;GO:0030900:forebrain development;GO:0043010:camera-type eye development;GO:0048048:embryonic eye morphogenesis;GO:0060041:retina development in came…	GO:0005634:nucleus;GO:0005737:cytoplasm;	GO:0001162:RNA polymerase II intronic transcription regulatory region sequence-specific DNA binding;GO:0001227:RNA polymerase II transcription regulatory region sequence-specific DNA binding transcription factor activity involved in negative regulation of transcription;GO:0031490:chromatin DNA binding;	K09318
ENSMUSG00000074682	239.788	-6.9552	0.389311	-17.8654	2.19e-71	4.41e-69	2	152411955	152415027	-	Zcchc3	zinc finger%2C CCHC domain containing 3 [Source:MGI Symbol%3BAcc:MGI:1915167]	GO:0008150:biological_process;	GO:0005575:cellular_component;	GO:0003723:RNA binding;GO:0008270:zinc ion binding;	-
ENSMUSG00000051817	287.876	-3.45537	0.194125	-17.7997	7.11e-71	1.41e-68	2	152393611	152398063	-	Sox12	SRY (sex determining region Y)-box 12 [Source:MGI Symbol%3BAcc:MGI:98360]	GO:0006366:transcription from RNA polymerase II promoter;GO:0021510:spinal cord development;GO:0045165:cell fate commitment;GO:0045944:positive regulation of transcription from RNA polymerase II promoter;GO:0065004:protein-DNA complex assembly;	GO:0005654:nucleoplasm;GO:0032993:protein-DNA complex;	GO:0000976:transcription regulatory region sequence-specific DNA binding;GO:0001077:RNA polymerase II core promoter proximal region sequence-specific DNA binding transcription factor activity involved in positive regulation of transcription;GO:0001105:RNA polymerase II transcription coactivator activity;	K09268
ENSMUSG00000024376	198.256	-4.38424	0.247192	-17.7361	2.21e-70	4.34e-68	18	33796327	34007206	-	Epb41l4a	erythrocyte membrane protein band 4.1 like 4a [Source:MGI Symbol%3BAcc:MGI:103007]	GO:0031032:actomyosin structure organization;	GO:0005737:cytoplasm;GO:0005856:cytoskeleton;	GO:0005200:structural constituent of cytoskeleton;GO:0008092:cytoskeletal protein binding;	-
ENSMUSG00000056888	179.867	-4.08057	0.230171	-17.7285	2.53e-70	4.93e-68	10	111985448	112002631	-	Glipr1	GLI pathogenesis-related 1 (glioma) [Source:MGI Symbol%3BAcc:MGI:1920940]	-	GO:0005576:extracellular region;GO:0016020:membrane;GO:0016021:integral component of membrane;	-	-
ENSMUSG00000004872	272.792	7.46459	0.421325	17.7169	3.1e-70	5.99e-68	1	78101267	78197134	-	Pax3	paired box 3 [Source:MGI Symbol%3BAcc:MGI:97487]	GO:0000122:negative regulation of transcription from RNA polymerase II promoter;GO:0001755:neural crest cell migration;GO:0001843:neural tube closure;GO:0006351:transcription, DNA-templated;GO:0007507:heart development;GO:0007517:muscle organ development;GO:0008283:cell proliferation;GO:0008284:positive regulation of cell proliferation;GO:0014029:neural crest formation;GO:0014807:regulation of so…	GO:0005634:nucleus;GO:0005654:nucleoplasm;GO:0005667:transcription factor complex;	GO:0003682:chromatin binding;GO:0003700:sequence-specific DNA binding transcription factor activity;GO:0003705:RNA polymerase II distal enhancer sequence-specific DNA binding transcription factor activity;GO:0005515:protein binding;GO:0043565:sequence-specific DNA binding;	K09381
ENSMUSG00000039405	932.429	2.9551	0.166946	17.701	4.12e-70	7.87e-68	7	89507783	89527187	-	Prss23	protease%2C serine 23 [Source:MGI Symbol%3BAcc:MGI:1923703]	GO:0006508:proteolysis;	GO:0005615:extracellular space;GO:0005634:nucleus;GO:0070062:extracellular exosome;	GO:0004252:serine-type endopeptidase activity;	K09627
ENSMUSG00000044042	501.916	-3.54791	0.200596	-17.6869	5.29e-70	1e-67	2	113327736	113716767	+	Fmn1	formin 1 [Source:MGI Symbol%3BAcc:MGI:101815]	GO:0001822:kidney development;GO:0010467:gene expression;GO:0030838:positive regulation of actin filament polymerization;GO:0035136:forelimb morphogenesis;GO:0035137:hindlimb morphogenesis;GO:0045010:actin nucleation;GO:0048705:skeletal system morphogenesis;GO:0048813:dendrite morphogenesis;GO:0051127:positive regulation of actin nucleation;GO:0051894:positive regulation of focal adhesion assembl…	GO:0005634:nucleus;GO:0005737:cytoplasm;GO:0005884:actin filament;GO:0005886:plasma membrane;GO:0005912:adherens junction;GO:0015630:microtubule cytoskeleton;	GO:0003779:actin binding;GO:0005515:protein binding;GO:0008017:microtubule binding;GO:0017124:SH3 domain binding;	K10367
ENSMUSG00000024420	520.957	2.45633	0.139038	17.6665	7.59e-70	1.42e-67	18	13687013	13972733	-	Zfp521	zinc finger protein 521 [Source:MGI Symbol%3BAcc:MGI:95459]	-	-	-	-
ENSMUSG00000021994	266.126	3.75254	0.212567	17.6535	9.57e-70	1.77e-67	14	28504750	28527447	+	Wnt5a	wingless-type MMTV integration site family%2C member 5A [Source:MGI Symbol%3BAcc:MGI:98958]	GO:0000187:activation of MAPK activity;GO:0001667:ameboidal-type cell migration;GO:0001736:establishment of planar polarity;GO:0001756:somitogenesis;GO:0001819:positive regulation of cytokine production;GO:0001843:neural tube closure;GO:0001934:positive regulation of protein phosphorylation;GO:0001938:positive regulation of endothelial cell proliferation;GO:0001947:heart looping;GO:0002009:morpho…	GO:0005576:extracellular region;GO:0005578:proteinaceous extracellular matrix;GO:0005615:extracellular space;GO:0005788:endoplasmic reticulum lumen;GO:0009986:cell surface;	GO:0003700:sequence-specific DNA binding transcription factor activity;GO:0005102:receptor binding;GO:0005109:frizzled binding;GO:0005110:frizzled-2 binding;GO:0005115:receptor tyrosine kinase-like orphan receptor binding;GO:0005125:cytokine activity;GO:0005515:protein binding;GO:0019904:protein domain specific binding;GO:0044212:transcription regulatory region DNA binding;GO:1902379:chemoattract…	K00444
ENSMUSG00000041112	301.496	3.83007	0.21746	17.6127	1.97e-69	3.61e-67	13	20090596	20608353	+	Elmo1	engulfment and cell motility 1 [Source:MGI Symbol%3BAcc:MGI:2153044]	GO:0006909:phagocytosis;GO:0006911:phagocytosis, engulfment;GO:0006915:apoptotic process;GO:0016477:cell migration;GO:0016601:Rac protein signal transduction;GO:0030029:actin filament-based process;GO:0030036:actin cytoskeleton organization;GO:0043547:positive regulation of GTPase activity;GO:0048870:cell motility;	GO:0005737:cytoplasm;GO:0005886:plasma membrane;GO:0016020:membrane;GO:0032045:guanyl-nucleotide exchange factor complex;	GO:0005085:guanyl-nucleotide exchange factor activity;GO:0005515:protein binding;GO:0017124:SH3 domain binding;	K12366
ENSMUSG00000035473	241.97	-2.97183	0.16925	-17.5588	5.1e-69	9.28e-67	17	80127471	80185101	+	Galm	galactose mutarotase [Source:MGI Symbol%3BAcc:MGI:2442420]	GO:0005975:carbohydrate metabolic process;GO:0006006:glucose metabolic process;GO:0006012:galactose metabolic process;GO:0033499:galactose catabolic process via UDP-galactose;	GO:0005737:cytoplasm;GO:0070062:extracellular exosome;	GO:0004034:aldose 1-epimerase activity;GO:0030246:carbohydrate binding;GO:0042803:protein homodimerization activity;	-
ENSMUSG00000001435	1357.11	3.81059	0.21737	17.5305	8.39e-69	1.51e-66	10	77052178	77166548	-	Col18a1	collagen%2C type XVIII%2C alpha 1 [Source:MGI Symbol%3BAcc:MGI:88451]	GO:0001525:angiogenesis;GO:0001886:endothelial cell morphogenesis;GO:0007155:cell adhesion;GO:0008284:positive regulation of cell proliferation;GO:0030198:extracellular matrix organization;GO:0030335:positive regulation of cell migration;GO:0042493:response to drug;GO:0051599:response to hydrostatic pressure;GO:2000353:positive regulation of endothelial cell apoptotic process;	GO:0005581:collagen trimer;GO:0005604:basement membrane;GO:0005615:extracellular space;GO:0031012:extracellular matrix;GO:0070062:extracellular exosome;	GO:0005198:structural molecule activity;GO:0046872:metal ion binding;	K06823
ENSMUSG00000027074	277.862	-7.28085	0.416101	-17.4978	1.49e-68	2.66e-66	2	84936579	84958509	+	Slc43a3	solute carrier family 43%2C member 3 [Source:MGI Symbol%3BAcc:MGI:1931054]	GO:0055085:transmembrane transport;	GO:0016021:integral component of membrane;	-	K08230
ENSMUSG00000024663	322.014	2.64668	0.151709	17.4457	3.71e-68	6.56e-66	19	10001669	10038380	+	Rab3il1	RAB3A interacting protein (rabin3)-like 1 [Source:MGI Symbol%3BAcc:MGI:1922010]	GO:0015031:protein transport;GO:0043547:positive regulation of GTPase activity;	GO:0005575:cellular_component;	GO:0017112:Rab guanyl-nucleotide exchange factor activity;	K16779
ENSMUSG00000039263	346.862	2.83137	0.162712	17.4012	8.08e-68	1.42e-65	2	174110349	174123070	+	Npepl1	aminopeptidase-like 1 [Source:MGI Symbol%3BAcc:MGI:2448523]	GO:0006508:proteolysis;GO:0008150:biological_process;	GO:0005634:nucleus;GO:0005737:cytoplasm;	GO:0004177:aminopeptidase activity;GO:0008235:metalloexopeptidase activity;GO:0030145:manganese ion binding;	-
ENSMUSG00000024302	639.302	2.5431	0.146611	17.3459	2.12e-67	3.68e-65	18	23415135	23659715	+	Dtna	dystrobrevin alpha [Source:MGI Symbol%3BAcc:MGI:106039]	-	GO:0005737:cytoplasm;GO:0016014:dystrobrevin complex;GO:0030054:cell junction;GO:0042383:sarcolemma;GO:0043234:protein complex;GO:0045202:synapse;	GO:0005515:protein binding;GO:0008270:zinc ion binding;	-
ENSMUSG00000025665	247.864	7.34792	0.423632	17.3451	2.15e-67	3.7e-65	X	111388192	111537959	-	Rps6ka6	ribosomal protein S6 kinase polypeptide 6 [Source:MGI Symbol%3BAcc:MGI:1914321]	GO:0006468:protein phosphorylation;GO:0006978:DNA damage response, signal transduction by p53 class mediator resulting in transcription of p21 class mediator;GO:0045992:negative regulation of embryonic development;GO:0070373:negative regulation of ERK1 and ERK2 cascade;GO:2000381:negative regulation of mesoderm development;	GO:0001650:fibrillar center;GO:0005634:nucleus;GO:0005730:nucleolus;GO:0005737:cytoplasm;GO:0005739:mitochondrion;GO:0005829:cytosol;	GO:0000287:magnesium ion binding;GO:0004674:protein serine/threonine kinase activity;GO:0005524:ATP binding;	K04373
ENSMUSG00000020265	1697.3	-1.56963	0.0905481	-17.3348	2.57e-67	4.39e-65	10	77606097	77618331	+	Sumo3	small ubiquitin-like modifier 3 [Source:MGI Symbol%3BAcc:MGI:1336201]	GO:0016925:protein sumoylation;GO:0034504:protein localization to nucleus;GO:0043392:negative regulation of DNA binding;GO:2000060:positive regulation of protein ubiquitination involved in ubiquitin-dependent protein catabolic process;	GO:0005634:nucleus;GO:0005737:cytoplasm;GO:0016604:nuclear body;GO:0016605:PML body;GO:0070062:extracellular exosome;	GO:0019789:SUMO transferase activity;GO:0019899:enzyme binding;GO:0031386:protein tag;	K12160
ENSMUSG00000025137	374.375	-3.21536	0.185667	-17.3179	3.45e-67	5.83e-65	11	120610087	120617936	-	Pcyt2	phosphate cytidylyltransferase 2%2C ethanolamine [Source:MGI Symbol%3BAcc:MGI:1915921]	GO:0006646:phosphatidylethanolamine biosynthetic process;	-	GO:0004306:ethanolamine-phosphate cytidylyltransferase activity;	K00980;K00967
ENSMUSG00000046186	1391.22	3.1025	0.179208	17.3122	3.8e-67	6.38e-65	9	78615546	78716253	+	Cd109	CD109 antigen [Source:MGI Symbol%3BAcc:MGI:2445221]	GO:0001933:negative regulation of protein phosphorylation;GO:0001942:hair follicle development;GO:0010839:negative regulation of keratinocyte proliferation;GO:0010951:negative regulation of endopeptidase activity;GO:0030512:negative regulation of transforming growth factor beta receptor signaling pathway;GO:0045616:regulation of keratinocyte differentiation;GO:0061045:negative regulation of wound…	GO:0005615:extracellular space;GO:0005886:plasma membrane;GO:0009986:cell surface;GO:0031225:anchored component of membrane;	GO:0004867:serine-type endopeptidase inhibitor activity;GO:0050431:transforming growth factor beta binding;	K06530
ENSMUSG00000025085	230.158	5.1809	0.302017	17.1543	5.84e-66	9.7e-64	19	57032733	57314919	-	Ablim1	actin-binding LIM protein 1 [Source:MGI Symbol%3BAcc:MGI:1194500]	GO:0007010:cytoskeleton organization;GO:0007411:axon guidance;GO:0030032:lamellipodium assembly;GO:0045944:positive regulation of transcription from RNA polymerase II promoter;GO:0060271:cilium morphogenesis;	GO:0001725:stress fiber;GO:0005737:cytoplasm;GO:0014069:postsynaptic density;GO:0015629:actin cytoskeleton;GO:0030027:lamellipodium;	GO:0003779:actin binding;GO:0005515:protein binding;GO:0046872:metal ion binding;	K07520
ENSMUSG00000020427	177.414	5.70069	0.333178	17.11	1.25e-65	2.06e-63	11	7206086	7213923	-	Igfbp3	insulin-like growth factor binding protein 3 [Source:MGI Symbol%3BAcc:MGI:96438]	GO:0001558:regulation of cell growth;GO:0001649:osteoblast differentiation;GO:0001933:negative regulation of protein phosphorylation;GO:0006468:protein phosphorylation;GO:0008285:negative regulation of cell proliferation;GO:0010906:regulation of glucose metabolic process;GO:0014912:negative regulation of smooth muscle cell migration;GO:0040008:regulation of growth;GO:0043065:positive regulation o…	GO:0005615:extracellular space;GO:0005634:nucleus;GO:0042567:insulin-like growth factor ternary complex;GO:0070062:extracellular exosome;	GO:0001968:fibronectin binding;GO:0005520:insulin-like growth factor binding;GO:0008160:protein tyrosine phosphatase activator activity;GO:0031994:insulin-like growth factor I binding;GO:0031995:insulin-like growth factor II binding;	K10138
ENSMUSG00000038296	201.195	3.41973	0.200544	17.0522	3.36e-65	5.5e-63	7	111471661	111779977	-	Galnt18	UDP-N-acetyl-alpha-D-galactosamine:polypeptide N-acetylgalactosaminyltransferase 18 [Source:MGI Symbol%3BAcc:MGI:2446239]	GO:0006486:protein glycosylation;GO:0008150:biological_process;	GO:0000139:Golgi membrane;GO:0005575:cellular_component;GO:0016021:integral component of membrane;	GO:0003674:molecular_function;GO:0004653:polypeptide N-acetylgalactosaminyltransferase activity;GO:0030246:carbohydrate binding;GO:0046872:metal ion binding;	K00710
ENSMUSG00000059751	1893.6	3.68459	0.216149	17.0465	3.71e-65	6.02e-63	13	108670603	108671397	+	Rps3a3	ribosomal protein S3A3 [Source:MGI Symbol%3BAcc:MGI:3643406]	-	-	-	K02984
ENSMUSG00000027955	1294.84	1.86843	0.109686	17.0344	4.56e-65	7.34e-63	3	79884533	79946280	+	Fam198b	family with sequence similarity 198%2C member B [Source:MGI Symbol%3BAcc:MGI:1915909]	GO:0008150:biological_process;	GO:0000139:Golgi membrane;GO:0005794:Golgi apparatus;GO:0016021:integral component of membrane;	GO:0003674:molecular_function;	-
ENSMUSG00000070691	205.086	-6.72914	0.395119	-17.0306	4.87e-65	7.76e-63	4	135120652	135177990	+	Runx3	runt related transcription factor 3 [Source:MGI Symbol%3BAcc:MGI:102672]	GO:0000122:negative regulation of transcription from RNA polymerase II promoter;GO:0001503:ossification;GO:0002062:chondrocyte differentiation;GO:0006468:protein phosphorylation;GO:0007411:axon guidance;GO:0030097:hemopoiesis;GO:0031069:hair follicle morphogenesis;GO:0031175:neuron projection development;GO:0032609:interferon-gamma production;GO:0042789:mRNA transcription from RNA polymerase II p…	GO:0000790:nuclear chromatin;GO:0005634:nucleus;GO:0005654:nucleoplasm;GO:0005730:nucleolus;GO:0005737:cytoplasm;GO:0005829:cytosol;GO:0043231:intracellular membrane-bounded organelle;	GO:0000977:RNA polymerase II regulatory region sequence-specific DNA binding;GO:0000981:sequence-specific DNA binding RNA polymerase II transcription factor activity;GO:0003677:DNA binding;GO:0005515:protein binding;GO:0005524:ATP binding;GO:0042826:histone deacetylase binding;GO:0046332:SMAD binding;	K09279
ENSMUSG00000040562	359.372	3.08511	0.181379	17.0092	7.02e-65	1.11e-62	3	107981702	107986453	-	Gstm2	glutathione S-transferase%2C mu 2 [Source:MGI Symbol%3BAcc:MGI:95861]	GO:0006749:glutathione metabolic process;GO:0018916:nitrobenzene metabolic process;GO:0042178:xenobiotic catabolic process;GO:0070458:cellular detoxification of nitrogen compound;	GO:0005737:cytoplasm;	GO:0004364:glutathione transferase activity;GO:0019899:enzyme binding;GO:0042803:protein homodimerization activity;GO:0043295:glutathione binding;GO:0046982:protein heterodimerization activity;	K00799
ENSMUSG00000020431	222.688	6.32305	0.372475	16.9758	1.24e-64	1.95e-62	11	7063489	7178506	+	Adcy1	adenylate cyclase 1 [Source:MGI Symbol%3BAcc:MGI:99677]	GO:0006171:cAMP biosynthetic process;GO:0006182:cGMP biosynthetic process;GO:0007165:signal transduction;GO:0007189:adenylate cyclase-activating G-protein coupled receptor signaling pathway;GO:0007190:activation of adenylate cyclase activity;GO:0007409:axonogenesis;GO:0007616:long-term memory;GO:0007623:circadian rhythm;GO:0010226:response to lithium ion;GO:0019933:cAMP-mediated signaling;GO:0042…	GO:0005634:nucleus;GO:0005737:cytoplasm;GO:0005886:plasma membrane;GO:0005887:integral component of plasma membrane;GO:0008074:guanylate cyclase complex, soluble;GO:0045121:membrane raft;GO:0070062:extracellular exosome;	GO:0004016:adenylate cyclase activity;GO:0004383:guanylate cyclase activity;GO:0005516:calmodulin binding;GO:0005524:ATP binding;GO:0008294:calcium- and calmodulin-responsive adenylate cyclase activity;GO:0046872:metal ion binding;	K08041
ENSMUSG00000073411	1452.17	-2.69481	0.159868	-16.8565	9.41e-64	1.46e-61	17	35262730	35267499	+	H2-D1	histocompatibility 2%2C D region locus 1 [Source:MGI Symbol%3BAcc:MGI:95896]	GO:0001916:positive regulation of T cell mediated cytotoxicity;GO:0002474:antigen processing and presentation of peptide antigen via MHC class I;GO:0002485:antigen processing and presentation of endogenous peptide antigen via MHC class I via ER pathway, TAP-dependent;GO:0006955:immune response;GO:0010977:negative regulation of neuron projection development;	GO:0005783:endoplasmic reticulum;GO:0005794:Golgi apparatus;GO:0005797:Golgi medial cisterna;GO:0005886:plasma membrane;GO:0009897:external side of plasma membrane;GO:0009986:cell surface;GO:0016020:membrane;GO:0030670:phagocytic vesicle membrane;GO:0042612:MHC class I protein complex;GO:0070062:extracellular exosome;GO:0070971:endoplasmic reticulum exit site;GO:0071556:integral component of lume…	GO:0003723:RNA binding;GO:0005102:receptor binding;GO:0005515:protein binding;GO:0030881:beta-2-microglobulin binding;GO:0042605:peptide antigen binding;GO:0042608:T cell receptor binding;GO:0046977:TAP binding;	K06751
ENSMUSG00000022103	161.995	-5.53561	0.329	-16.8255	1.59e-63	2.45e-61	14	70890130	70979838	+	Gfra2	glial cell line derived neurotrophic factor family receptor alpha 2 [Source:MGI Symbol%3BAcc:MGI:1195462]	GO:0007169:transmembrane receptor protein tyrosine kinase signaling pathway;GO:0007399:nervous system development;GO:0031953:negative regulation of protein autophosphorylation;GO:0033139:regulation of peptidyl-serine phosphorylation of STAT protein;GO:0033141:positive regulation of peptidyl-serine phosphorylation of STAT protein;GO:0035860:glial cell-derived neurotrophic factor receptor signaling…	GO:0005886:plasma membrane;GO:0031225:anchored component of membrane;	GO:0016167:glial cell-derived neurotrophic factor receptor activity;	-
ENSMUSG00000027227	902.845	1.67221	0.100255	16.6795	1.85e-62	2.83e-60	2	122234749	122265340	+	Sord	sorbitol dehydrogenase [Source:MGI Symbol%3BAcc:MGI:98266]	GO:0006060:sorbitol metabolic process;GO:0006062:sorbitol catabolic process;GO:0006970:response to osmotic stress;GO:0009725:response to hormone;GO:0030317:sperm motility;GO:0031667:response to nutrient levels;GO:0042493:response to drug;GO:0046370:fructose biosynthetic process;GO:0046686:response to cadmium ion;GO:0046688:response to copper ion;GO:0051160:L-xylitol catabolic process;GO:0051164:L…	GO:0005739:mitochondrion;GO:0016020:membrane;GO:0031514:motile cilium;GO:0031966:mitochondrial membrane;GO:0070062:extracellular exosome;	GO:0003939:L-iditol 2-dehydrogenase activity;GO:0008270:zinc ion binding;GO:0042802:identical protein binding;GO:0046526:D-xylulose reductase activity;GO:0051287:NAD binding;	K00008
ENSMUSG00000030761	642.834	4.16742	0.250768	16.6186	5.11e-62	7.76e-60	7	98051060	98119524	-	Myo7a	myosin VIIA [Source:MGI Symbol%3BAcc:MGI:104510]	GO:0001845:phagolysosome assembly;GO:0006886:intracellular protein transport;GO:0006909:phagocytosis;GO:0007040:lysosome organization;GO:0007600:sensory perception;GO:0007601:visual perception;GO:0007605:sensory perception of sound;GO:0030030:cell projection organization;GO:0030048:actin filament-based movement;GO:0042472:inner ear morphogenesis;GO:0042490:mechanoreceptor differentiation;GO:00424…	GO:0001750:photoreceptor outer segment;GO:0001917:photoreceptor inner segment;GO:0005737:cytoplasm;GO:0005765:lysosomal membrane;GO:0005829:cytosol;GO:0005902:microvillus;GO:0005938:cell cortex;GO:0016324:apical plasma membrane;GO:0031477:myosin VII complex;GO:0032391:photoreceptor connecting cilium;GO:0032420:stereocilium;GO:0042470:melanosome;GO:0045202:synapse;GO:1990435:upper tip-link density;	GO:0000146:microfilament motor activity;GO:0005515:protein binding;GO:0005516:calmodulin binding;GO:0005524:ATP binding;GO:0019904:protein domain specific binding;GO:0030507:spectrin binding;GO:0030898:actin-dependent ATPase activity;GO:0042803:protein homodimerization activity;GO:0043531:ADP binding;GO:0047485:protein N-terminus binding;GO:0051015:actin filament binding;	K10359
ENSMUSG00000074766	181.841	-6.58672	0.396958	-16.593	7.83e-62	1.18e-59	2	139678178	139758581	+	Ism1	isthmin 1%2C angiogenesis inhibitor [Source:MGI Symbol%3BAcc:MGI:2442963]	GO:0016525:negative regulation of angiogenesis;	GO:0005576:extracellular region;	-	-
ENSMUSG00000050069	180.774	-6.32493	0.382375	-16.5412	1.85e-61	2.77e-59	1	174833785	174921819	-	Grem2	gremlin 2%2C DAN family BMP antagonist [Source:MGI Symbol%3BAcc:MGI:1344367]	GO:0010172:embryonic body morphogenesis;GO:0019221:cytokine-mediated signaling pathway;GO:0030514:negative regulation of BMP signaling pathway;GO:0038098:sequestering of BMP from receptor via BMP binding;GO:0048263:determination of dorsal identity;GO:0060300:regulation of cytokine activity;	GO:0005615:extracellular space;	GO:0005125:cytokine activity;GO:0008201:heparin binding;GO:0036122:BMP binding;GO:0042803:protein homodimerization activity;	-
ENSMUSG00000001870	6185.94	1.68153	0.102175	16.4573	7.43e-61	1.1e-58	17	75005568	75392512	+	Ltbp1	latent transforming growth factor beta binding protein 1 [Source:MGI Symbol%3BAcc:MGI:109151]	GO:0003281:ventricular septum development;GO:0007179:transforming growth factor beta receptor signaling pathway;GO:0035904:aorta development;GO:0060976:coronary vasculature development;	GO:0001527:microfibril;GO:0005578:proteinaceous extracellular matrix;GO:0005615:extracellular space;GO:0031012:extracellular matrix;GO:0043234:protein complex;	GO:0005509:calcium ion binding;GO:0050431:transforming growth factor beta binding;GO:0050436:microfibril binding;	K17307
ENSMUSG00000038776	452.542	2.1775	0.132499	16.4341	1.09e-60	1.6e-58	1	180976210	181020904	-	Ephx1	epoxide hydrolase 1%2C microsomal [Source:MGI Symbol%3BAcc:MGI:95405]	GO:0006725:cellular aromatic compound metabolic process;GO:0009636:response to toxic substance;GO:0014070:response to organic cyclic compound;GO:0019439:aromatic compound catabolic process;	GO:0005789:endoplasmic reticulum membrane;GO:0016021:integral component of membrane;GO:0031090:organelle membrane;	GO:0033961:cis-stilbene-oxide hydrolase activity;	K01253
ENSMUSG00000064373	490.986	2.83208	0.172548	16.4133	1.54e-60	2.24e-58	15	3268547	3280508	+	Selenop	selenoprotein P [Source:MGI Symbol%3BAcc:MGI:894288]	GO:0001887:selenium compound metabolic process;GO:0007420:brain development;GO:0007626:locomotory behavior;GO:0009791:post-embryonic development;GO:0019953:sexual reproduction;GO:0040007:growth;	GO:0005576:extracellular region;GO:0005615:extracellular space;GO:0070062:extracellular exosome;	GO:0008430:selenium binding;	-
ENSMUSG00000024164	707.536	-3.84483	0.235137	-16.3515	4.25e-60	6.16e-58	17	57203970	57228136	-	C3	complement component 3 [Source:MGI Symbol%3BAcc:MGI:88227]	GO:0001798:positive regulation of type IIa hypersensitivity;GO:0001934:positive regulation of protein phosphorylation;GO:0001970:positive regulation of activation of membrane attack complex;GO:0006631:fatty acid metabolic process;GO:0006911:phagocytosis, engulfment;GO:0006954:inflammatory response;GO:0006956:complement activation;GO:0006957:complement activation, alternative pathway;GO:0006958:co…	GO:0005615:extracellular space;GO:0043234:protein complex;GO:0070062:extracellular exosome;GO:0072562:blood microparticle;	GO:0004866:endopeptidase inhibitor activity;GO:0005515:protein binding;GO:0031715:C5L2 anaphylatoxin chemotactic receptor binding;	-
ENSMUSG00000032816	146.263	5.11725	0.313837	16.3054	9.03e-60	1.3e-57	9	65101486	65137940	+	Igdcc4	immunoglobulin superfamily%2C DCC subclass%2C member 4 [Source:MGI Symbol%3BAcc:MGI:1858497]	GO:0008150:biological_process;	GO:0005887:integral component of plasma membrane;	GO:0003674:molecular_function;	-
ENSMUSG00000008206	317.905	2.28728	0.141676	16.1445	1.24e-58	1.77e-56	8	4493026	4531680	+	Cers4	ceramide synthase 4 [Source:MGI Symbol%3BAcc:MGI:1914510]	GO:0030148:sphingolipid biosynthetic process;GO:0046513:ceramide biosynthetic process;	GO:0005783:endoplasmic reticulum;GO:0005789:endoplasmic reticulum membrane;GO:0016021:integral component of membrane;GO:0031965:nuclear membrane;	GO:0003677:DNA binding;GO:0050291:sphingosine N-acyltransferase activity;	-
ENSMUSG00000019577	158.436	5.94508	0.368942	16.1138	2.04e-58	2.89e-56	6	5483351	5496309	-	Pdk4	pyruvate dehydrogenase kinase%2C isoenzyme 4 [Source:MGI Symbol%3BAcc:MGI:1351481]	GO:0006006:glucose metabolic process;GO:0006468:protein phosphorylation;GO:0006885:regulation of pH;GO:0008286:insulin receptor signaling pathway;GO:0009267:cellular response to starvation;GO:0010510:regulation of acetyl-CoA biosynthetic process from pyruvate;GO:0010565:regulation of cellular ketone metabolic process;GO:0010906:regulation of glucose metabolic process;GO:0042304:regulation of fatt…	GO:0005739:mitochondrion;GO:0005743:mitochondrial inner membrane;GO:0005759:mitochondrial matrix;	GO:0004672:protein kinase activity;GO:0004712:protein serine/threonine/tyrosine kinase activity;GO:0004740:pyruvate dehydrogenase (acetyl-transferring) kinase activity;GO:0005524:ATP binding;	K00898
ENSMUSG00000046318	334.684	3.05162	0.18939	16.1129	2.07e-58	2.92e-56	18	66045302	66302739	-	Ccbe1	collagen and calcium binding EGF domains 1 [Source:MGI Symbol%3BAcc:MGI:2445053]	GO:0001945:lymph vessel development;GO:0001946:lymphangiogenesis;GO:0002040:sprouting angiogenesis;GO:0003016:respiratory system process;GO:0007585:respiratory gaseous exchange;GO:0010575:positive regulation of vascular endothelial growth factor production;GO:0010595:positive regulation of endothelial cell migration;GO:0010954:positive regulation of protein processing;GO:0030324:lung development;…	GO:0005578:proteinaceous extracellular matrix;GO:0005581:collagen trimer;GO:0005615:extracellular space;	GO:0002020:protease binding;GO:0005509:calcium ion binding;GO:0005518:collagen binding;	K19638
ENSMUSG00000028885	177.708	-6.63233	0.412388	-16.0827	3.37e-58	4.71e-56	4	132732966	132757252	-	Smpdl3b	sphingomyelin phosphodiesterase%2C acid-like 3B [Source:MGI Symbol%3BAcc:MGI:1916022]	GO:0006685:sphingomyelin catabolic process;GO:0006954:inflammatory response;GO:0034122:negative regulation of toll-like receptor signaling pathway;GO:0045087:innate immune response;GO:0045824:negative regulation of innate immune response;GO:0046466:membrane lipid catabolic process;GO:0050728:negative regulation of inflammatory response;	GO:0005615:extracellular space;GO:0005886:plasma membrane;GO:0031225:anchored component of membrane;GO:0070062:extracellular exosome;	GO:0004767:sphingomyelin phosphodiesterase activity;GO:0005515:protein binding;GO:0008081:phosphoric diester hydrolase activity;GO:0016798:hydrolase activity, acting on glycosyl bonds;GO:0046872:metal ion binding;	K01128
ENSMUSG00000046714	330.873	-2.32779	0.144747	-16.0817	3.43e-58	4.75e-56	8	121116171	121118895	+	Foxc2	forkhead box C2 [Source:MGI Symbol%3BAcc:MGI:1347481]	GO:0000122:negative regulation of transcription from RNA polymerase II promoter;GO:0001501:skeletal system development;GO:0001503:ossification;GO:0001568:blood vessel development;GO:0001569:patterning of blood vessels;GO:0001656:metanephros development;GO:0001657:ureteric bud development;GO:0001756:somitogenesis;GO:0001822:kidney development;GO:0001945:lymph vessel development;GO:0001946:lymphang…	GO:0005634:nucleus;GO:0005654:nucleoplasm;GO:0016604:nuclear body;	GO:0001077:RNA polymerase II core promoter proximal region sequence-specific DNA binding transcription factor activity involved in positive regulation of transcription;GO:0003677:DNA binding;GO:0003700:sequence-specific DNA binding transcription factor activity;GO:0003705:RNA polymerase II distal enhancer sequence-specific DNA binding transcription factor activity;GO:0031490:chromatin DNA binding…	K09396
ENSMUSG00000022485	348.04	2.5355	0.157831	16.0646	4.52e-58	6.22e-56	15	102967443	103017429	+	Hoxc5	homeobox C5 [Source:MGI Symbol%3BAcc:MGI:96196]	GO:0006351:transcription, DNA-templated;GO:0006355:regulation of transcription, DNA-templated;GO:0009952:anterior/posterior pattern specification;GO:0048706:embryonic skeletal system development;	GO:0005654:nucleoplasm;GO:0030054:cell junction;	GO:0003700:sequence-specific DNA binding transcription factor activity;GO:0043565:sequence-specific DNA binding;	K09305
ENSMUSG00000019880	175.811	6.75922	0.421905	16.0207	9.16e-58	1.25e-55	10	29452416	29535867	-	Rspo3	R-spondin 3 [Source:MGI Symbol%3BAcc:MGI:1920030]	GO:0001525:angiogenesis;GO:0001974:blood vessel remodeling;GO:0002040:sprouting angiogenesis;GO:0016055:Wnt signaling pathway;GO:0060670:branching involved in labyrinthine layer morphogenesis;GO:0090263:positive regulation of canonical Wnt signaling pathway;GO:2000052:positive regulation of non-canonical Wnt signaling pathway;	GO:0005576:extracellular region;	GO:0005102:receptor binding;GO:0005109:frizzled binding;GO:0008201:heparin binding;	-
ENSMUSG00000022865	1801.8	-1.87446	0.117152	-16.0002	1.27e-57	1.73e-55	16	78301496	78359785	+	Cxadr	coxsackie virus and adenovirus receptor [Source:MGI Symbol%3BAcc:MGI:1201679]	GO:0007005:mitochondrion organization;GO:0007157:heterophilic cell-cell adhesion via plasma membrane cell adhesion molecules;GO:0007507:heart development;GO:0008354:germ cell migration;GO:0010669:epithelial structure maintenance;GO:0016337:single organismal cell-cell adhesion;GO:0030593:neutrophil chemotaxis;GO:0031532:actin cytoskeleton reorganization;GO:0034109:homotypic cell-cell adhesion;GO:0…	GO:0001669:acrosomal vesicle;GO:0005615:extracellular space;GO:0005634:nucleus;GO:0005654:nucleoplasm;GO:0005737:cytoplasm;GO:0005886:plasma membrane;GO:0005911:cell-cell junction;GO:0005912:adherens junction;GO:0005913:cell-cell adherens junction;GO:0005923:bicellular tight junction;GO:0014704:intercalated disc;GO:0016021:integral component of membrane;GO:0016323:basolateral plasma membrane;GO:0…	GO:0005102:receptor binding;GO:0005178:integrin binding;GO:0005515:protein binding;GO:0008013:beta-catenin binding;GO:0030165:PDZ domain binding;GO:0042802:identical protein binding;GO:0050839:cell adhesion molecule binding;GO:0071253:connexin binding;GO:0086082:cell adhesive protein binding involved in AV node cell-bundle of His cell communication;	K06788
ENSMUSG00000063531	151.382	6.10674	0.382745	15.9551	2.62e-57	3.54e-55	5	14025276	14256689	+	Sema3e	sema domain%2C immunoglobulin domain (Ig)%2C short basic domain%2C secreted%2C (semaphorin) 3E [Source:MGI Symbol%3BAcc:MGI:1340034]	GO:0001569:patterning of blood vessels;GO:0001953:negative regulation of cell-matrix adhesion;GO:0002040:sprouting angiogenesis;GO:0007399:nervous system development;GO:0008360:regulation of cell shape;GO:0016525:negative regulation of angiogenesis;GO:0030154:cell differentiation;GO:0050808:synapse organization;GO:0050919:negative chemotaxis;GO:0071526:semaphorin-plexin signaling pathway;GO:20002…	GO:0005576:extracellular region;GO:0005615:extracellular space;	GO:0005515:protein binding;GO:0030215:semaphorin receptor binding;GO:0038191:neuropilin binding;	K06840
ENSMUSG00000032261	137.016	-5.37904	0.339129	-15.8613	1.17e-56	1.57e-54	9	83548327	83638801	+	Sh3bgrl2	SH3 domain binding glutamic acid-rich protein like 2 [Source:MGI Symbol%3BAcc:MGI:1915350]	GO:0008150:biological_process;	GO:0005654:nucleoplasm;GO:0005737:cytoplasm;GO:0031965:nuclear membrane;GO:0070062:extracellular exosome;	GO:0005515:protein binding;GO:0017124:SH3 domain binding;	-
ENSMUSG00000038456	1059.46	1.93545	0.122092	15.8525	1.35e-56	1.8e-54	6	39462378	39557867	-	Dennd2a	DENN/MADD domain containing 2A [Source:MGI Symbol%3BAcc:MGI:2444961]	GO:0015031:protein transport;GO:0042147:retrograde transport, endosome to Golgi;GO:0043547:positive regulation of GTPase activity;	GO:0005829:cytosol;GO:0015629:actin cytoskeleton;	GO:0017112:Rab guanyl-nucleotide exchange factor activity;	K20161
ENSMUSG00000023886	153.8	6.35418	0.400917	15.8491	1.43e-56	1.88e-54	17	14279506	14404790	+	Smoc2	SPARC related modular calcium binding 2 [Source:MGI Symbol%3BAcc:MGI:1929881]	GO:0007165:signal transduction;GO:0010811:positive regulation of cell-substrate adhesion;GO:0030198:extracellular matrix organization;	GO:0005578:proteinaceous extracellular matrix;GO:0005604:basement membrane;GO:0005614:interstitial matrix;	GO:0005509:calcium ion binding;GO:0005539:glycosaminoglycan binding;GO:0008201:heparin binding;	-
ENSMUSG00000063873	168.088	6.7016	0.423115	15.8387	1.68e-56	2.21e-54	2	145167754	145642166	+	Slc24a3	solute carrier family 24 (sodium/potassium/calcium exchanger)%2C member 3 [Source:MGI Symbol%3BAcc:MGI:2137513]	GO:0006813:potassium ion transport;GO:0006874:cellular calcium ion homeostasis;GO:0035725:sodium ion transmembrane transport;GO:0070588:calcium ion transmembrane transport;	GO:0005886:plasma membrane;GO:0005887:integral component of plasma membrane;	GO:0005262:calcium channel activity;GO:0005509:calcium ion binding;GO:0008273:calcium, potassium:sodium antiporter activity;GO:0015293:symporter activity;GO:0030955:potassium ion binding;GO:0031402:sodium ion binding;	K13751
ENSMUSG00000000938	393.772	-3.0104	0.19018	-15.8293	1.95e-56	2.54e-54	6	52231197	52240854	-	Hoxa10	homeobox A10 [Source:MGI Symbol%3BAcc:MGI:96171]	GO:0001501:skeletal system development;GO:0006366:transcription from RNA polymerase II promoter;GO:0007275:multicellular organismal development;GO:0007283:spermatogenesis;GO:0007338:single fertilization;GO:0008584:male gonad development;GO:0009952:anterior/posterior pattern specification;GO:0009954:proximal/distal pattern formation;GO:0010468:regulation of gene expression;GO:0030326:embryonic lim…	GO:0005634:nucleus;GO:0005667:transcription factor complex;GO:0005737:cytoplasm;	GO:0000978:RNA polymerase II core promoter proximal region sequence-specific DNA binding;GO:0001077:RNA polymerase II core promoter proximal region sequence-specific DNA binding transcription factor activity involved in positive regulation of transcription;GO:0003677:DNA binding;GO:0042826:histone deacetylase binding;	K17443
ENSMUSG00000045636	323.423	3.15432	0.199275	15.8289	1.97e-56	2.54e-54	8	40990914	41133726	-	Mtus1	mitochondrial tumor suppressor 1 [Source:MGI Symbol%3BAcc:MGI:2142572]	GO:0007049:cell cycle;GO:0010758:regulation of macrophage chemotaxis;	GO:0005615:extracellular space;GO:0005730:nucleolus;GO:0005737:cytoplasm;GO:0005739:mitochondrion;GO:0005794:Golgi apparatus;GO:0005886:plasma membrane;GO:0015630:microtubule cytoskeleton;	GO:0003674:molecular_function;	-
ENSMUSG00000024339	131.844	-3.86769	0.244357	-15.828	1.99e-56	2.56e-54	17	34203527	34216321	+	Tap2	transporter 2%2C ATP-binding cassette%2C sub-family B (MDR/TAP) [Source:MGI Symbol%3BAcc:MGI:98484]	GO:0001916:positive regulation of T cell mediated cytotoxicity;GO:0002237:response to molecule of bacterial origin;GO:0002250:adaptive immune response;GO:0002481:antigen processing and presentation of exogenous protein antigen via MHC class Ib, TAP-dependent;GO:0002485:antigen processing and presentation of endogenous peptide antigen via MHC class I via ER pathway, TAP-dependent;GO:0002489:antige…	GO:0005783:endoplasmic reticulum;GO:0016020:membrane;GO:0016021:integral component of membrane;GO:0016607:nuclear speck;GO:0030176:integral component of endoplasmic reticulum membrane;GO:0042825:TAP complex;	GO:0005515:protein binding;GO:0005524:ATP binding;GO:0015197:peptide transporter activity;GO:0015433:peptide antigen-transporting ATPase activity;GO:0023029:MHC class Ib protein binding;GO:0046978:TAP1 binding;GO:0046980:tapasin binding;	K05654
ENSMUSG00000048960	217.378	3.54555	0.224295	15.8076	2.76e-56	3.52e-54	1	10993465	11303681	+	Prex2	phosphatidylinositol-3%2C4%2C5-trisphosphate-dependent Rac exchange factor 2 [Source:MGI Symbol%3BAcc:MGI:1923385]	GO:0006469:negative regulation of protein kinase activity;GO:0007186:G-protein coupled receptor signaling pathway;GO:0008344:adult locomotory behavior;GO:0014065:phosphatidylinositol 3-kinase signaling;GO:0032007:negative regulation of TOR signaling;GO:0035023:regulation of Rho protein signal transduction;GO:0043547:positive regulation of GTPase activity;GO:0048813:dendrite morphogenesis;	GO:0005737:cytoplasm;GO:0005886:plasma membrane;	GO:0005096:GTPase activator activity;GO:0030676:Rac guanyl-nucleotide exchange factor activity;	-
ENSMUSG00000037370	178.421	3.41926	0.216408	15.8001	3.11e-56	3.94e-54	10	24637914	24712159	-	Enpp1	ectonucleotide pyrophosphatase/phosphodiesterase 1 [Source:MGI Symbol%3BAcc:MGI:97370]	GO:0006091:generation of precursor metabolites and energy;GO:0006796:phosphate-containing compound metabolic process;GO:0006898:receptor-mediated endocytosis;GO:0006955:immune response;GO:0009143:nucleoside triphosphate catabolic process;GO:0030279:negative regulation of ossification;GO:0030308:negative regulation of cell growth;GO:0030505:inorganic diphosphate transport;GO:0030643:cellular phosp…	GO:0005615:extracellular space;GO:0005765:lysosomal membrane;GO:0005886:plasma membrane;GO:0005887:integral component of plasma membrane;GO:0009986:cell surface;GO:0016021:integral component of membrane;GO:0016323:basolateral plasma membrane;	GO:0003676:nucleic acid binding;GO:0004528:phosphodiesterase I activity;GO:0004551:nucleotide diphosphatase activity;GO:0005044:scavenger receptor activity;GO:0005158:insulin receptor binding;GO:0005509:calcium ion binding;GO:0005524:ATP binding;GO:0008270:zinc ion binding;GO:0030247:polysaccharide binding;GO:0035529:NADH pyrophosphatase activity;GO:0042803:protein homodimerization activity;GO:00…	K01513
ENSMUSG00000075254	169.016	4.31727	0.2734	15.7911	3.59e-56	4.52e-54	16	33684466	33771576	+	Heg1	heart development protein with EGF-like domains 1 [Source:MGI Symbol%3BAcc:MGI:1924696]	GO:0001570:vasculogenesis;GO:0001701:in utero embryonic development;GO:0001885:endothelial cell development;GO:0001886:endothelial cell morphogenesis;GO:0001944:vasculature development;GO:0001945:lymph vessel development;GO:0003017:lymph circulation;GO:0003209:cardiac atrium morphogenesis;GO:0003222:ventricular trabecula myocardium morphogenesis;GO:0003281:ventricular septum development;GO:000704…	GO:0005911:cell-cell junction;GO:0009897:external side of plasma membrane;GO:0009986:cell surface;GO:0016021:integral component of membrane;	GO:0005509:calcium ion binding;GO:0005515:protein binding;	-
ENSMUSG00000031340	163.349	6.84616	0.433729	15.7844	3.98e-56	4.99e-54	X	72255999	72274803	-	Gabre	gamma-aminobutyric acid (GABA) A receptor%2C subunit epsilon [Source:MGI Symbol%3BAcc:MGI:1330235]	GO:0006821:chloride transport;GO:0007214:gamma-aminobutyric acid signaling pathway;GO:0034220:ion transmembrane transport;	GO:0005887:integral component of plasma membrane;GO:0030054:cell junction;GO:0045202:synapse;	GO:0004890:GABA-A receptor activity;GO:0005230:extracellular ligand-gated ion channel activity;	K05185
ENSMUSG00000019929	4077.4	-2.18995	0.139284	-15.7229	1.05e-55	1.31e-53	10	97479609	97518143	+	Dcn	decorin [Source:MGI Symbol%3BAcc:MGI:94872]	GO:0001822:kidney development;GO:0001890:placenta development;GO:0006469:negative regulation of protein kinase activity;GO:0007519:skeletal muscle tissue development;GO:0007568:aging;GO:0009612:response to mechanical stimulus;GO:0010508:positive regulation of autophagy;GO:0010596:negative regulation of endothelial cell migration;GO:0014068:positive regulation of phosphatidylinositol 3-kinase sign…	GO:0005578:proteinaceous extracellular matrix;GO:0005589:collagen type VI trimer;GO:0005615:extracellular space;GO:0005737:cytoplasm;GO:0031012:extracellular matrix;	GO:0003723:RNA binding;GO:0004860:protein kinase inhibitor activity;GO:0005518:collagen binding;GO:0005539:glycosaminoglycan binding;GO:0047485:protein N-terminus binding;GO:0050840:extracellular matrix binding;	K04660
ENSMUSG00000060961	143.705	-4.5071	0.28674	-15.7184	1.13e-55	1.4e-53	5	88886818	89239653	+	Slc4a4	solute carrier family 4 (anion exchanger)%2C member 4 [Source:MGI Symbol%3BAcc:MGI:1927555]	GO:0006814:sodium ion transport;GO:0006885:regulation of pH;GO:0015698:inorganic anion transport;GO:0015701:bicarbonate transport;GO:0035725:sodium ion transmembrane transport;GO:0051453:regulation of intracellular pH;GO:0098656:anion transmembrane transport;	GO:0005887:integral component of plasma membrane;GO:0016323:basolateral plasma membrane;GO:0070062:extracellular exosome;	GO:0005452:inorganic anion exchanger activity;GO:0005515:protein binding;GO:0008510:sodium:bicarbonate symporter activity;	K13575;K13861
ENSMUSG00000090958	170.588	4.73225	0.301138	15.7145	1.2e-55	1.48e-53	7	98489283	98502181	+	Lrrc32	leucine rich repeat containing 32 [Source:MGI Symbol%3BAcc:MGI:93882]	GO:0010628:positive regulation of gene expression;GO:0046007:negative regulation of activated T cell proliferation;GO:0050710:negative regulation of cytokine secretion;	GO:0005887:integral component of plasma membrane;	-	-
ENSMUSG00000022419	625.814	1.65196	0.105161	15.7088	1.32e-55	1.61e-53	15	55112317	55259271	+	Deptor	DEP domain containing MTOR-interacting protein [Source:MGI Symbol%3BAcc:MGI:2146322]	GO:0006469:negative regulation of protein kinase activity;GO:0032007:negative regulation of TOR signaling;GO:0035556:intracellular signal transduction;GO:0045792:negative regulation of cell size;GO:2001236:regulation of extrinsic apoptotic signaling pathway;	GO:0005622:intracellular;GO:0005737:cytoplasm;	-	K20402
ENSMUSG00000039601	138.417	5.89537	0.375299	15.7085	1.32e-55	1.61e-53	17	43801851	44039516	+	Rcan2	regulator of calcineurin 2 [Source:MGI Symbol%3BAcc:MGI:1858219]	GO:0006979:response to oxidative stress;GO:0007219:Notch signaling pathway;GO:0007614:short-term memory;GO:0031987:locomotion involved in locomotory behavior;GO:0033173:calcineurin-NFAT signaling cascade;GO:0050790:regulation of catalytic activity;GO:0070884:regulation of calcineurin-NFAT signaling cascade;	GO:0005737:cytoplasm;	GO:0003676:nucleic acid binding;GO:0008597:calcium-dependent protein serine/threonine phosphatase regulator activity;	K17903
ENSMUSG00000031548	184.257	4.52582	0.288732	15.6748	2.25e-55	2.71e-53	8	23411502	23449632	+	Sfrp1	secreted frizzled-related protein 1 [Source:MGI Symbol%3BAcc:MGI:892014]	GO:0001649:osteoblast differentiation;GO:0001657:ureteric bud development;GO:0001756:somitogenesis;GO:0001843:neural tube closure;GO:0002244:hematopoietic progenitor cell differentiation;GO:0006508:proteolysis;GO:0007186:G-protein coupled receptor signaling pathway;GO:0008284:positive regulation of cell proliferation;GO:0008285:negative regulation of cell proliferation;GO:0008584:male gonad devel…	GO:0005578:proteinaceous extracellular matrix;GO:0005615:extracellular space;GO:0005622:intracellular;GO:0005829:cytosol;GO:0005886:plasma membrane;GO:0009986:cell surface;GO:0016021:integral component of membrane;GO:0031012:extracellular matrix;GO:0070062:extracellular exosome;	GO:0004197:cysteine-type endopeptidase activity;GO:0004930:G-protein coupled receptor activity;GO:0005109:frizzled binding;GO:0005515:protein binding;GO:0008144:drug binding;GO:0008201:heparin binding;GO:0017147:Wnt-protein binding;GO:0042802:identical protein binding;GO:0042813:Wnt-activated receptor activity;	K02166
ENSMUSG00000020312	1506	1.86347	0.119032	15.6552	3.06e-55	3.67e-53	10	79618051	79637918	-	Shc2	SHC (Src homology 2 domain containing) transforming protein 2 [Source:MGI Symbol%3BAcc:MGI:106180]	GO:0000187:activation of MAPK activity;GO:0007169:transmembrane receptor protein tyrosine kinase signaling pathway;GO:0035556:intracellular signal transduction;	GO:0005622:intracellular;GO:0005886:plasma membrane;	GO:0030971:receptor tyrosine kinase binding;	K17447;K06279
ENSMUSG00000038319	358.934	3.14356	0.200934	15.6448	3.61e-55	4.29e-53	5	24319589	24351604	-	Kcnh2	potassium voltage-gated channel%2C subfamily H (eag-related)%2C member 2 [Source:MGI Symbol%3BAcc:MGI:1341722]	GO:0000160:phosphorelay signal transduction system;GO:0023014:signal transduction by protein phosphorylation;GO:0035690:cellular response to drug;GO:0042391:regulation of membrane potential;GO:0055075:potassium ion homeostasis;GO:0060048:cardiac muscle contraction;GO:0060306:regulation of membrane repolarization;GO:0060307:regulation of ventricular cardiac muscle cell membrane repolarization;GO:0…	GO:0005635:nuclear envelope;GO:0005737:cytoplasm;GO:0005886:plasma membrane;GO:0005887:integral component of plasma membrane;GO:0008076:voltage-gated potassium channel complex;GO:0009986:cell surface;GO:0048471:perinuclear region of cytoplasm;	GO:0000155:phosphorelay sensor kinase activity;GO:0005242:inward rectifier potassium channel activity;GO:0005249:voltage-gated potassium channel activity;GO:0005251:delayed rectifier potassium channel activity;GO:0031625:ubiquitin protein ligase binding;GO:0042802:identical protein binding;GO:0042803:protein homodimerization activity;GO:0055131:C3HC4-type RING finger domain binding;GO:0097110:sca…	K04905
ENSMUSG00000026535	170.961	6.83585	0.437371	15.6294	4.59e-55	5.43e-53	1	173962568	173982744	-	Ifi202b	interferon activated gene 202B [Source:MGI Symbol%3BAcc:MGI:1347083]	-	-	-	K12971
ENSMUSG00000079685	253.835	-3.79459	0.243092	-15.6096	6.26e-55	7.36e-53	10	7440362	7473638	-	Ulbp1	UL16 binding protein 1 [Source:MGI Symbol%3BAcc:MGI:1925027]	GO:0001913:T cell mediated cytotoxicity;GO:0002839:positive regulation of immune response to tumor cell;GO:0030101:natural killer cell activation;GO:0032729:positive regulation of interferon-gamma production;GO:0032816:positive regulation of natural killer cell activation;GO:0042267:natural killer cell mediated cytotoxicity;GO:0042271:susceptibility to natural killer cell mediated cytotoxicity;GO…	GO:0005829:cytosol;GO:0005886:plasma membrane;GO:0005887:integral component of plasma membrane;GO:0009897:external side of plasma membrane;GO:0015629:actin cytoskeleton;GO:0046658:anchored component of plasma membrane;	GO:0046703:natural killer cell lectin-like receptor binding;	K07986
ENSMUSG00000012519	129.673	-4.78991	0.306933	-15.6057	6.65e-55	7.78e-53	8	111311797	111338177	-	Mlkl	mixed lineage kinase domain-like [Source:MGI Symbol%3BAcc:MGI:1921818]	GO:0006468:protein phosphorylation;GO:0035556:intracellular signal transduction;GO:0070207:protein homotrimerization;GO:0070266:necroptotic process;	GO:0005737:cytoplasm;GO:0005886:plasma membrane;	GO:0004672:protein kinase activity;GO:0004871:signal transducer activity;GO:0005515:protein binding;GO:0005524:ATP binding;GO:0019901:protein kinase binding;GO:0032403:protein complex binding;	K08849
ENSMUSG00000052957	3627.09	1.74381	0.111856	15.5898	8.55e-55	9.93e-53	13	60174405	60177365	-	Gas1	growth arrest specific 1 [Source:MGI Symbol%3BAcc:MGI:95655]	GO:0002053:positive regulation of mesenchymal cell proliferation;GO:0007050:cell cycle arrest;GO:0007411:axon guidance;GO:0008284:positive regulation of cell proliferation;GO:0008589:regulation of smoothened signaling pathway;GO:0009953:dorsal/ventral pattern formation;GO:0010955:negative regulation of protein processing;GO:0012501:programmed cell death;GO:0021587:cerebellum morphogenesis;GO:0021…	GO:0005886:plasma membrane;GO:0016020:membrane;GO:0046658:anchored component of plasma membrane;	GO:0005515:protein binding;	K06232
ENSMUSG00000034551	158.652	6.79116	0.436051	15.5742	1.09e-54	1.26e-52	X	111569931	111697079	-	Hdx	highly divergent homeobox [Source:MGI Symbol%3BAcc:MGI:2685226]	GO:0008150:biological_process;	GO:0005575:cellular_component;GO:0005634:nucleus;	GO:0003677:DNA binding;	K13100
ENSMUSG00000078452	158.184	6.7888	0.435921	15.5735	1.1e-54	1.27e-52	10	22360552	22374139	+	Raet1d	retinoic acid early transcript delta [Source:MGI Symbol%3BAcc:MGI:1861032]	GO:0001913:T cell mediated cytotoxicity;GO:0042267:natural killer cell mediated cytotoxicity;	GO:0009897:external side of plasma membrane;GO:0046658:anchored component of plasma membrane;	GO:0005515:protein binding;GO:0046703:natural killer cell lectin-like receptor binding;	K07987
ENSMUSG00000003746	134.592	5.85455	0.37646	15.5516	1.55e-54	1.77e-52	10	53904785	54076609	-	Man1a	mannosidase 1%2C alpha [Source:MGI Symbol%3BAcc:MGI:104677]	-	-	-	K01230
ENSMUSG00000025355	1213.16	2.06256	0.13283	15.5278	2.25e-54	2.55e-52	10	128790910	128800824	+	Mmp19	matrix metallopeptidase 19 [Source:MGI Symbol%3BAcc:MGI:1927899]	GO:0001525:angiogenesis;GO:0001541:ovarian follicle development;GO:0001542:ovulation from ovarian follicle;GO:0001554:luteolysis;GO:0006508:proteolysis;GO:0009725:response to hormone;GO:0022617:extracellular matrix disassembly;GO:0030154:cell differentiation;GO:0030574:collagen catabolic process;GO:0051591:response to cAMP;	GO:0005576:extracellular region;GO:0005578:proteinaceous extracellular matrix;GO:0005615:extracellular space;GO:0005886:plasma membrane;GO:0031225:anchored component of membrane;	GO:0004222:metalloendopeptidase activity;GO:0004252:serine-type endopeptidase activity;GO:0008270:zinc ion binding;	K07998
ENSMUSG00000073565	123.1	-5.24431	0.338156	-15.5085	3.04e-54	3.43e-52	18	51117898	51304641	+	Prr16	proline rich 16 [Source:MGI Symbol%3BAcc:MGI:1918623]	GO:0045727:positive regulation of translation;GO:0045793:positive regulation of cell size;	GO:0005575:cellular_component;	GO:0003674:molecular_function;	-
ENSMUSG00000022186	4048.38	1.36126	0.0880679	15.457	6.77e-54	7.59e-52	15	4026383	4155344	+	Oxct1	3-oxoacid CoA transferase 1 [Source:MGI Symbol%3BAcc:MGI:1914291]	GO:0007420:brain development;GO:0007507:heart development;GO:0007584:response to nutrient;GO:0009725:response to hormone;GO:0014823:response to activity;GO:0035774:positive regulation of insulin secretion involved in cellular response to glucose stimulus;GO:0042182:ketone catabolic process;GO:0042493:response to drug;GO:0042594:response to starvation;GO:0045471:response to ethanol;GO:0046950:cell…	GO:0005654:nucleoplasm;GO:0005739:mitochondrion;GO:0005759:mitochondrial matrix;	GO:0008260:3-oxoacid CoA-transferase activity;GO:0042803:protein homodimerization activity;	K01027
ENSMUSG00000033685	136.616	-5.19842	0.33639	-15.4535	7.14e-54	7.96e-52	7	100493337	100502020	+	Ucp2	uncoupling protein 2 (mitochondrial%2C proton carrier) [Source:MGI Symbol%3BAcc:MGI:109354]	GO:0000303:response to superoxide;GO:0001666:response to hypoxia;GO:0006839:mitochondrial transport;GO:0007565:female pregnancy;GO:0007568:aging;GO:0009409:response to cold;GO:0010942:positive regulation of cell death;GO:0015992:proton transport;GO:0032869:cellular response to insulin stimulus;GO:0034198:cellular response to amino acid starvation;GO:0043066:negative regulation of apoptotic proces…	GO:0005739:mitochondrion;GO:0005743:mitochondrial inner membrane;GO:0016021:integral component of membrane;	GO:0017077:oxidative phosphorylation uncoupler activity;	K15103;K15100
ENSMUSG00000026932	568.117	1.93965	0.125628	15.4396	8.86e-54	9.82e-52	2	26055535	26123220	-	Nacc2	nucleus accumbens associated 2%2C BEN and BTB (POZ) domain containing [Source:MGI Symbol%3BAcc:MGI:1915241]	GO:0008285:negative regulation of cell proliferation;GO:0010608:posttranscriptional regulation of gene expression;GO:0016575:histone deacetylation;GO:0034629:cellular protein complex localization;GO:0045892:negative regulation of transcription, DNA-templated;GO:0051260:protein homooligomerization;GO:1900477:negative regulation of G1/S transition of mitotic cell cycle by negative regulation of tra…	GO:0000790:nuclear chromatin;GO:0005634:nucleus;GO:0005730:nucleolus;GO:0005739:mitochondrion;GO:0016581:NuRD complex;	GO:0000978:RNA polymerase II core promoter proximal region sequence-specific DNA binding;GO:0001076:RNA polymerase II transcription factor binding transcription factor activity;GO:0001078:RNA polymerase II core promoter proximal region sequence-specific DNA binding transcription factor activity involved in negative regulation of transcription;GO:0004407:histone deacetylase activity;GO:0042803:pro…	K10486
ENSMUSG00000025810	842.397	1.96371	0.127771	15.369	2.64e-53	2.91e-51	8	128358604	128503363	+	Nrp1	neuropilin 1 [Source:MGI Symbol%3BAcc:MGI:106206]	GO:0001525:angiogenesis;GO:0001569:patterning of blood vessels;GO:0001764:neuron migration;GO:0002040:sprouting angiogenesis;GO:0002042:cell migration involved in sprouting angiogenesis;GO:0007411:axon guidance;GO:0007413:axonal fasciculation;GO:0007507:heart development;GO:0008045:motor neuron axon guidance;GO:0009611:response to wounding;GO:0016358:dendrite development;GO:0016477:cell migration…	GO:0005615:extracellular space;GO:0005769:early endosome;GO:0005829:cytosol;GO:0005883:neurofilament;GO:0005886:plasma membrane;GO:0005925:focal adhesion;GO:0009986:cell surface;GO:0016021:integral component of membrane;GO:0030424:axon;GO:0030426:growth cone;GO:0043025:neuronal cell body;GO:0097443:sorting endosome;	GO:0005021:vascular endothelial growth factor-activated receptor activity;GO:0005515:protein binding;GO:0008201:heparin binding;GO:0017154:semaphorin receptor activity;GO:0019838:growth factor binding;GO:0038085:vascular endothelial growth factor binding;GO:0046872:metal ion binding;	K06724;K13045
ENSMUSG00000050315	195.64	3.31767	0.216222	15.3438	3.89e-53	4.27e-51	3	123076519	123236149	-	Synpo2	synaptopodin 2 [Source:MGI Symbol%3BAcc:MGI:2153070]	GO:0030335:positive regulation of cell migration;GO:0032233:positive regulation of actin filament bundle assembly;GO:2000298:regulation of Rho-dependent protein serine/threonine kinase activity;	GO:0001725:stress fiber;GO:0005634:nucleus;GO:0005829:cytosol;GO:0005925:focal adhesion;GO:0015629:actin cytoskeleton;GO:0030018:Z disc;GO:0043231:intracellular membrane-bounded organelle;	GO:0003779:actin binding;GO:0005515:protein binding;GO:0031005:filamin binding;GO:0051371:muscle alpha-actinin binding;GO:0051393:alpha-actinin binding;GO:0071889:14-3-3 protein binding;	-
ENSMUSG00000028944	235.437	2.3906	0.155983	15.3261	5.12e-53	5.58e-51	5	24862744	25100642	-	Prkag2	protein kinase%2C AMP-activated%2C gamma 2 non-catalytic subunit [Source:MGI Symbol%3BAcc:MGI:1336153]	GO:0005977:glycogen metabolic process;GO:0006110:regulation of glycolytic process;GO:0006468:protein phosphorylation;GO:0006469:negative regulation of protein kinase activity;GO:0006633:fatty acid biosynthetic process;GO:0007005:mitochondrion organization;GO:0010800:positive regulation of peptidyl-threonine phosphorylation;GO:0019217:regulation of fatty acid metabolic process;GO:0032147:activatio…	GO:0005615:extracellular space;GO:0005654:nucleoplasm;GO:0005829:cytosol;GO:0031588:AMP-activated protein kinase complex;	GO:0004679:AMP-activated protein kinase activity;GO:0004862:cAMP-dependent protein kinase inhibitor activity;GO:0005524:ATP binding;GO:0008603:cAMP-dependent protein kinase regulator activity;GO:0008607:phosphorylase kinase regulator activity;GO:0016208:AMP binding;GO:0019901:protein kinase binding;GO:0030295:protein kinase activator activity;GO:0043531:ADP binding;	K07200
ENSMUSG00000021876	462.066	-1.85229	0.121212	-15.2814	1.02e-52	1.1e-50	14	51091077	51106151	+	Rnase4	ribonuclease%2C RNase A family 4 [Source:MGI Symbol%3BAcc:MGI:1926217]	GO:0009267:cellular response to starvation;GO:0090501:RNA phosphodiester bond hydrolysis;	GO:0005576:extracellular region;GO:0005615:extracellular space;GO:0070062:extracellular exosome;	GO:0003676:nucleic acid binding;GO:0004519:endonuclease activity;GO:0004540:ribonuclease activity;	K16632
ENSMUSG00000034330	231.265	3.4876	0.22859	15.257	1.48e-52	1.59e-50	8	117498291	117635142	+	Plcg2	phospholipase C%2C gamma 2 [Source:MGI Symbol%3BAcc:MGI:97616]	GO:0002092:positive regulation of receptor internalization;GO:0002223:stimulatory C-type lectin receptor signaling pathway;GO:0002316:follicular B cell differentiation;GO:0006661:phosphatidylinositol biosynthetic process;GO:0009395:phospholipid catabolic process;GO:0010468:regulation of gene expression;GO:0030183:B cell differentiation;GO:0032237:activation of store-operated calcium channel activ…	GO:0005829:cytosol;GO:0005886:plasma membrane;GO:0070062:extracellular exosome;	GO:0001784:phosphotyrosine binding;GO:0004435:phosphatidylinositol phospholipase C activity;GO:0004629:phospholipase C activity;GO:0004871:signal transducer activity;GO:0005515:protein binding;	K05859
ENSMUSG00000027071	806.588	2.67298	0.175379	15.2412	1.88e-52	2.02e-50	2	84998583	85037462	-	P2rx3	purinergic receptor P2X%2C ligand-gated ion channel%2C 3 [Source:MGI Symbol%3BAcc:MGI:1097160]	GO:0001666:response to hypoxia;GO:0006811:ion transport;GO:0006812:cation transport;GO:0007268:synaptic transmission;GO:0007274:neuromuscular synaptic transmission;GO:0009266:response to temperature stimulus;GO:0009408:response to heat;GO:0009409:response to cold;GO:0009612:response to mechanical stimulus;GO:0009743:response to carbohydrate;GO:0010033:response to organic substance;GO:0014832:urin…	GO:0005639:integral component of nuclear inner membrane;GO:0005791:rough endoplasmic reticulum;GO:0005794:Golgi apparatus;GO:0005887:integral component of plasma membrane;GO:0030424:axon;GO:0043005:neuron projection;GO:0043025:neuronal cell body;GO:0043195:terminal bouton;GO:0043197:dendritic spine;GO:0043235:receptor complex;GO:0045121:membrane raft;	GO:0001614:purinergic nucleotide receptor activity;GO:0004931:extracellular ATP-gated cation channel activity;GO:0005524:ATP binding;	K05217
ENSMUSG00000050737	379.958	-2.29575	0.150683	-15.2356	2.05e-52	2.19e-50	2	30889471	30929863	-	Ptges	prostaglandin E synthase [Source:MGI Symbol%3BAcc:MGI:1927593]	GO:0001516:prostaglandin biosynthetic process;GO:0002526:acute inflammatory response;GO:0002544:chronic inflammatory response;GO:0006693:prostaglandin metabolic process;GO:0008285:negative regulation of cell proliferation;GO:0014070:response to organic cyclic compound;GO:0032496:response to lipopolysaccharide;GO:0032526:response to retinoic acid;GO:0034097:response to cytokine;GO:0051592:response…	GO:0005641:nuclear envelope lumen;GO:0005737:cytoplasm;GO:0016021:integral component of membrane;GO:0048471:perinuclear region of cytoplasm;	GO:0004667:prostaglandin-D synthase activity;GO:0043295:glutathione binding;GO:0050220:prostaglandin-E synthase activity;	K15729
ENSMUSG00000021792	130.912	4.19145	0.275941	15.1897	4.14e-52	4.39e-50	14	40993740	41013788	-	Fam213a	family with sequence similarity 213%2C member A [Source:MGI Symbol%3BAcc:MGI:1917814]	GO:0045670:regulation of osteoclast differentiation;GO:0055114:oxidation-reduction process;	GO:0005737:cytoplasm;GO:0005739:mitochondrion;GO:0070062:extracellular exosome;	GO:0016209:antioxidant activity;	-
ENSMUSG00000039982	1491.57	2.41351	0.159179	15.1623	6.29e-52	6.63e-50	19	12466341	12501996	-	Dtx4	deltex 4%2C E3 ubiquitin ligase [Source:MGI Symbol%3BAcc:MGI:2672905]	GO:0007219:Notch signaling pathway;GO:0008150:biological_process;GO:0016567:protein ubiquitination;	GO:0005575:cellular_component;GO:0005737:cytoplasm;	GO:0008270:zinc ion binding;GO:0016740:transferase activity;	K06058
ENSMUSG00000050751	149.626	-4.4873	0.297853	-15.0655	2.73e-51	2.86e-49	8	124369049	124439658	-	Pgbd5	piggyBac transposable element derived 5 [Source:MGI Symbol%3BAcc:MGI:2429955]	GO:0008150:biological_process;	GO:0005575:cellular_component;	GO:0003674:molecular_function;	-
ENSMUSG00000004085	932.146	1.72827	0.11476	15.0599	2.97e-51	3.1e-49	2	72285637	72442610	+	Map3k20	mitogen-activated protein kinase kinase kinase 20 [Source:MGI Symbol%3BAcc:MGI:2443258]	GO:0000075:cell cycle checkpoint;GO:0000077:DNA damage checkpoint;GO:0000186:activation of MAPKK activity;GO:0006468:protein phosphorylation;GO:0007010:cytoskeleton organization;GO:0007050:cell cycle arrest;GO:0007257:activation of JUN kinase activity;GO:0009314:response to radiation;GO:0035556:intracellular signal transduction;GO:0042733:embryonic digit morphogenesis;GO:0043065:positive regulati…	GO:0005634:nucleus;GO:0005737:cytoplasm;GO:0005829:cytosol;	GO:0000287:magnesium ion binding;GO:0003723:RNA binding;GO:0004674:protein serine/threonine kinase activity;GO:0004709:MAP kinase kinase kinase activity;GO:0005524:ATP binding;	-
ENSMUSG00000061048	265.302	2.53497	0.168524	15.0422	3.88e-51	4.03e-49	8	106510891	106557297	+	Cdh3	cadherin 3 [Source:MGI Symbol%3BAcc:MGI:88356]	GO:0001895:retina homeostasis;GO:0007156:homophilic cell adhesion via plasma membrane adhesion molecules;GO:0010628:positive regulation of gene expression;GO:0010838:positive regulation of keratinocyte proliferation;GO:0016337:single organismal cell-cell adhesion;GO:0022405:hair cycle process;GO:0031424:keratinization;GO:0032773:positive regulation of monophenol monooxygenase activity;GO:0032912:…	GO:0005737:cytoplasm;GO:0005886:plasma membrane;GO:0005913:cell-cell adherens junction;GO:0016021:integral component of membrane;	GO:0005509:calcium ion binding;	K06796
ENSMUSG00000104861	159.978	4.23549	0.282017	15.0186	5.55e-51	5.72e-49	12	49389652	49407360	+	3110039M20Rik	RIKEN cDNA 3110039M20 gene [Source:MGI Symbol%3BAcc:MGI:1914543]	-	-	-	-
ENSMUSG00000019997	16670.8	2.07018	0.137928	15.0092	6.4e-51	6.56e-49	10	24595442	24598683	+	Ctgf	connective tissue growth factor [Source:MGI Symbol%3BAcc:MGI:95537]	GO:0001502:cartilage condensation;GO:0001503:ossification;GO:0001525:angiogenesis;GO:0001558:regulation of cell growth;GO:0001894:tissue homeostasis;GO:0007160:cell-matrix adhesion;GO:0007229:integrin-mediated signaling pathway;GO:0007267:cell-cell signaling;GO:0007568:aging;GO:0008284:positive regulation of cell proliferation;GO:0008543:fibroblast growth factor receptor signaling pathway;GO:0009…	GO:0005576:extracellular region;GO:0005578:proteinaceous extracellular matrix;GO:0005615:extracellular space;GO:0005794:Golgi apparatus;GO:0005801:cis-Golgi network;GO:0005829:cytosol;GO:0005938:cell cortex;GO:0043231:intracellular membrane-bounded organelle;GO:0048471:perinuclear region of cytoplasm;	GO:0001968:fibronectin binding;GO:0005178:integrin binding;GO:0005520:insulin-like growth factor binding;GO:0008022:protein C-terminus binding;GO:0008083:growth factor activity;GO:0008201:heparin binding;	-
ENSMUSG00000052914	129.317	6.39729	0.428272	14.9374	1.88e-50	1.92e-48	4	96516138	96553661	-	Cyp2j6	cytochrome P450%2C family 2%2C subfamily j%2C polypeptide 6 [Source:MGI Symbol%3BAcc:MGI:1270148]	GO:0001523:retinoid metabolic process;GO:0007565:female pregnancy;GO:0014070:response to organic cyclic compound;GO:0019373:epoxygenase P450 pathway;GO:0032966:negative regulation of collagen biosynthetic process;GO:0035359:negative regulation of peroxisome proliferator activated receptor signaling pathway;GO:0043651:linoleic acid metabolic process;GO:0055114:oxidation-reduction process;	GO:0005783:endoplasmic reticulum;GO:0005789:endoplasmic reticulum membrane;GO:0031090:organelle membrane;GO:0070062:extracellular exosome;	GO:0003958:NADPH-hemoprotein reductase activity;GO:0005506:iron ion binding;GO:0008392:arachidonic acid epoxygenase activity;GO:0008404:arachidonic acid 14,15-epoxygenase activity;GO:0008405:arachidonic acid 11,12-epoxygenase activity;GO:0020037:heme binding;GO:0070330:aromatase activity;GO:0071614:linoleic acid epoxygenase activity;	K07418
ENSMUSG00000031647	1740.55	2.15728	0.144794	14.899	3.35e-50	3.4e-48	8	60632827	60676729	+	Mfap3l	microfibrillar-associated protein 3-like [Source:MGI Symbol%3BAcc:MGI:1918556]	GO:0008150:biological_process;	GO:0005634:nucleus;GO:0005737:cytoplasm;GO:0005886:plasma membrane;GO:0016021:integral component of membrane;	GO:0003674:molecular_function;	-
ENSMUSG00000020121	125.493	5.52544	0.371362	14.8788	4.52e-50	4.57e-48	10	121780991	122047315	-	Srgap1	SLIT-ROBO Rho GTPase activating protein 1 [Source:MGI Symbol%3BAcc:MGI:2152936]	GO:0007266:Rho protein signal transduction;GO:0016477:cell migration;GO:0030336:negative regulation of cell migration;GO:0043547:positive regulation of GTPase activity;	GO:0005737:cytoplasm;	GO:0005096:GTPase activator activity;GO:0005515:protein binding;GO:0017048:Rho GTPase binding;GO:0048365:Rac GTPase binding;	-
ENSMUSG00000045954	898.499	1.66689	0.112042	14.8774	4.62e-50	4.64e-48	1	51289126	51302960	+	Sdpr	serum deprivation response [Source:MGI Symbol%3BAcc:MGI:99513]	-	-	-	-
ENSMUSG00000020773	161.243	-2.94875	0.198645	-14.8444	7.57e-50	7.56e-48	11	116105752	116127210	-	Trim47	tripartite motif-containing 47 [Source:MGI Symbol%3BAcc:MGI:1917374]	GO:0008150:biological_process;	GO:0005634:nucleus;GO:0005829:cytosol;	GO:0008270:zinc ion binding;	K12023
ENSMUSG00000051339	147.433	5.94675	0.400649	14.8428	7.75e-50	7.7e-48	5	113086323	113221236	-	2900026A02Rik	RIKEN cDNA 2900026A02 gene [Source:MGI Symbol%3BAcc:MGI:1920194]	-	-	-	-
ENSMUSG00000040274	668.642	-1.83655	0.123898	-14.823	1.04e-49	1.03e-47	5	3341485	3531008	+	Cdk6	cyclin-dependent kinase 6 [Source:MGI Symbol%3BAcc:MGI:1277162]	GO:0000082:G1/S transition of mitotic cell cycle;GO:0000122:negative regulation of transcription from RNA polymerase II promoter;GO:0001954:positive regulation of cell-matrix adhesion;GO:0002244:hematopoietic progenitor cell differentiation;GO:0003323:type B pancreatic cell development;GO:0006468:protein phosphorylation;GO:0007219:Notch signaling pathway;GO:0008284:positive regulation of cell pro…	GO:0000307:cyclin-dependent protein kinase holoenzyme complex;GO:0001726:ruffle;GO:0005634:nucleus;GO:0005654:nucleoplasm;GO:0005737:cytoplasm;GO:0005813:centrosome;GO:0005829:cytosol;GO:0097132:cyclin D2-CDK6 complex;	GO:0004693:cyclin-dependent protein serine/threonine kinase activity;GO:0005515:protein binding;GO:0005524:ATP binding;GO:0016301:kinase activity;GO:0030332:cyclin binding;GO:0098770:FBXO family protein binding;	K02091
ENSMUSG00000048078	615.677	2.14525	0.145543	14.7396	3.59e-49	3.53e-47	7	96171246	96911093	+	Tenm4	teneurin transmembrane protein 4 [Source:MGI Symbol%3BAcc:MGI:2447063]	GO:0000902:cell morphogenesis;GO:0001702:gastrulation with mouth forming second;GO:0007157:heterophilic cell-cell adhesion via plasma membrane cell adhesion molecules;GO:0007165:signal transduction;GO:0031641:regulation of myelination;GO:0031643:positive regulation of myelination;GO:0032289:central nervous system myelin formation;GO:0048666:neuron development;GO:0048714:positive regulation of oli…	GO:0005634:nucleus;GO:0005737:cytoplasm;GO:0005886:plasma membrane;GO:0005887:integral component of plasma membrane;GO:0043005:neuron projection;	GO:0042803:protein homodimerization activity;GO:0046982:protein heterodimerization activity;GO:0050839:cell adhesion molecule binding;	-
ENSMUSG00000000266	144.332	3.97049	0.269654	14.7244	4.49e-49	4.4e-47	X	140664599	140767715	+	Mid2	midline 2 [Source:MGI Symbol%3BAcc:MGI:1344333]	GO:0010508:positive regulation of autophagy;GO:0016567:protein ubiquitination;GO:0032897:negative regulation of viral transcription;GO:0035372:protein localization to microtubule;GO:0043123:positive regulation of I-kappaB kinase/NF-kappaB signaling;GO:0045087:innate immune response;GO:0046597:negative regulation of viral entry into host cell;GO:0051091:positive regulation of sequence-specific DNA…	GO:0005737:cytoplasm;GO:0005874:microtubule;GO:0070062:extracellular exosome;	GO:0008017:microtubule binding;GO:0008270:zinc ion binding;GO:0016740:transferase activity;GO:0042802:identical protein binding;GO:0042803:protein homodimerization activity;GO:0046982:protein heterodimerization activity;GO:0051219:phosphoprotein binding;	K10647
ENSMUSG00000029403	113.821	-3.67872	0.249863	-14.7229	4.59e-49	4.47e-47	5	92006074	92043883	-	Cdkl2	cyclin-dependent kinase-like 2 (CDC2-related kinase) [Source:MGI Symbol%3BAcc:MGI:1858227]	GO:0006468:protein phosphorylation;GO:0051726:regulation of cell cycle;GO:1903955:positive regulation of protein targeting to mitochondrion;	GO:0005634:nucleus;GO:0005737:cytoplasm;GO:0005813:centrosome;	GO:0004693:cyclin-dependent protein serine/threonine kinase activity;GO:0005524:ATP binding;	K08824
ENSMUSG00000043342	121.509	-6.03116	0.410742	-14.6836	8.22e-49	7.96e-47	2	74697727	74700208	+	Hoxd9	homeobox D9 [Source:MGI Symbol%3BAcc:MGI:96210]	GO:0000122:negative regulation of transcription from RNA polymerase II promoter;GO:0006351:transcription, DNA-templated;GO:0007338:single fertilization;GO:0007519:skeletal muscle tissue development;GO:0008344:adult locomotory behavior;GO:0009952:anterior/posterior pattern specification;GO:0009954:proximal/distal pattern formation;GO:0010468:regulation of gene expression;GO:0030879:mammary gland d…	GO:0005634:nucleus;GO:0005730:nucleolus;	GO:0000977:RNA polymerase II regulatory region sequence-specific DNA binding;GO:0001227:RNA polymerase II transcription regulatory region sequence-specific DNA binding transcription factor activity involved in negative regulation of transcription;GO:0003677:DNA binding;GO:0003700:sequence-specific DNA binding transcription factor activity;	K09294
ENSMUSG00000036446	109.081	-5.70944	0.389782	-14.6478	1.39e-48	1.34e-46	10	97565128	97572703	+	Lum	lumican [Source:MGI Symbol%3BAcc:MGI:109347]	GO:0007409:axonogenesis;GO:0007601:visual perception;GO:0014070:response to organic cyclic compound;GO:0030199:collagen fibril organization;GO:0032914:positive regulation of transforming growth factor beta1 production;GO:0045944:positive regulation of transcription from RNA polymerase II promoter;GO:0051216:cartilage development;GO:0070848:response to growth factor;	GO:0005578:proteinaceous extracellular matrix;GO:0005583:fibrillar collagen trimer;GO:0005615:extracellular space;GO:0031012:extracellular matrix;GO:0070062:extracellular exosome;	GO:0005518:collagen binding;	K08122
ENSMUSG00000074622	114.187	-4.00033	0.273336	-14.6352	1.67e-48	1.61e-46	2	160363703	160367065	-	Mafb	v-maf musculoaponeurotic fibrosarcoma oncogene family%2C protein B (avian) [Source:MGI Symbol%3BAcc:MGI:104555]	GO:0006355:regulation of transcription, DNA-templated;GO:0006357:regulation of transcription from RNA polymerase II promoter;GO:0006366:transcription from RNA polymerase II promoter;GO:0007379:segment specification;GO:0007585:respiratory gaseous exchange;GO:0021571:rhombomere 5 development;GO:0021572:rhombomere 6 development;GO:0021599:abducens nerve formation;GO:0033077:T cell differentiation in…	GO:0005634:nucleus;GO:0005654:nucleoplasm;GO:0005667:transcription factor complex;	GO:0000978:RNA polymerase II core promoter proximal region sequence-specific DNA binding;GO:0001077:RNA polymerase II core promoter proximal region sequence-specific DNA binding transcription factor activity involved in positive regulation of transcription;GO:0003677:DNA binding;GO:0005515:protein binding;GO:0008134:transcription factor binding;	K09036
ENSMUSG00000086427	106.293	-5.18555	0.354918	-14.6106	2.41e-48	2.3e-46	6	52244393	52249799	+	Hoxa11os	homeobox A11%2C opposite strand [Source:MGI Symbol%3BAcc:MGI:107208]	-	-	-	-
ENSMUSG00000022144	345.641	-3.08418	0.211122	-14.6085	2.48e-48	2.35e-46	15	7811011	7837575	+	Gdnf	glial cell line derived neurotrophic factor [Source:MGI Symbol%3BAcc:MGI:107430]	GO:0001656:metanephros development;GO:0001657:ureteric bud development;GO:0001658:branching involved in ureteric bud morphogenesis;GO:0001755:neural crest cell migration;GO:0001759:organ induction;GO:0001941:postsynaptic membrane organization;GO:0003337:mesenchymal to epithelial transition involved in metanephros morphogenesis;GO:0007169:transmembrane receptor protein tyrosine kinase signaling pa…	GO:0005576:extracellular region;	GO:0005160:transforming growth factor beta receptor binding;GO:0008083:growth factor activity;GO:0042803:protein homodimerization activity;	K05452
ENSMUSG00000034758	303.02	2.06005	0.141034	14.6067	2.55e-48	2.41e-46	10	81590904	81601073	-	Tle6	transducin-like enhancer of split 6 [Source:MGI Symbol%3BAcc:MGI:2149593]	GO:0045666:positive regulation of neuron differentiation;GO:0050769:positive regulation of neurogenesis;GO:0060136:embryonic process involved in female pregnancy;	GO:0005634:nucleus;GO:0005829:cytosol;GO:0005938:cell cortex;GO:0043234:protein complex;	GO:0005515:protein binding;	-
ENSMUSG00000054612	126.22	6.31906	0.43313	14.5893	3.29e-48	3.09e-46	7	136894614	137130266	+	Mgmt	O-6-methylguanine-DNA methyltransferase [Source:MGI Symbol%3BAcc:MGI:96977]	GO:0006281:DNA repair;GO:0006307:DNA dealkylation involved in DNA repair;GO:0006974:cellular response to DNA damage stimulus;GO:0009636:response to toxic substance;GO:0032259:methylation;GO:0034599:cellular response to oxidative stress;GO:0042493:response to drug;GO:0043066:negative regulation of apoptotic process;GO:0043281:regulation of cysteine-type endopeptidase activity involved in apoptotic…	GO:0005634:nucleus;GO:0005654:nucleoplasm;GO:0016020:membrane;	GO:0003677:DNA binding;GO:0003908:methylated-DNA-[protein]-cysteine S-methyltransferase activity;GO:0005509:calcium ion binding;GO:0008168:methyltransferase activity;	K00567
ENSMUSG00000041046	280.889	2.85094	0.195643	14.5722	4.22e-48	3.95e-46	11	6658521	6677475	+	Ramp3	receptor (calcitonin) activity modifying protein 3 [Source:MGI Symbol%3BAcc:MGI:1860292]	GO:0001921:positive regulation of receptor recycling;GO:0006816:calcium ion transport;GO:0006886:intracellular protein transport;GO:0007186:G-protein coupled receptor signaling pathway;GO:0008277:regulation of G-protein coupled receptor protein signaling pathway;GO:0010628:positive regulation of gene expression;GO:0010739:positive regulation of protein kinase A signaling;GO:0010942:positive regul…	GO:0005622:intracellular;GO:0005764:lysosome;GO:0005886:plasma membrane;GO:0009986:cell surface;GO:0043235:receptor complex;GO:1903440:amylin receptor complex;	GO:0004872:receptor activity;GO:0008565:protein transporter activity;GO:0015026:coreceptor activity;GO:0097643:amylin receptor activity;	K08449
ENSMUSG00000067586	420.573	2.56341	0.176201	14.5482	6e-48	5.59e-46	13	51408639	51422797	+	S1pr3	sphingosine-1-phosphate receptor 3 [Source:MGI Symbol%3BAcc:MGI:1339365]	GO:0001816:cytokine production;GO:0003376:sphingosine-1-phosphate signaling pathway;GO:0006954:inflammatory response;GO:0007193:adenylate cyclase-inhibiting G-protein coupled receptor signaling pathway;GO:0007219:Notch signaling pathway;GO:0032651:regulation of interleukin-1 beta production;GO:1903141:negative regulation of establishment of endothelial barrier;	GO:0005886:plasma membrane;GO:0005887:integral component of plasma membrane;	GO:0004930:G-protein coupled receptor activity;GO:0005178:integrin binding;GO:0038036:sphingosine-1-phosphate receptor activity;	K04290
ENSMUSG00000070576	230.255	2.58834	0.177952	14.5452	6.27e-48	5.81e-46	5	111417362	111457033	+	Mn1	meningioma 1 [Source:MGI Symbol%3BAcc:MGI:1261813]	GO:0001957:intramembranous ossification;GO:0006351:transcription, DNA-templated;GO:0006355:regulation of transcription, DNA-templated;GO:0007275:multicellular organismal development;	-	-	-
ENSMUSG00000033278	657.801	2.27131	0.156329	14.529	7.93e-48	7.32e-46	17	66666848	67354459	-	Ptprm	protein tyrosine phosphatase%2C receptor type%2C M [Source:MGI Symbol%3BAcc:MGI:102694]	GO:0001937:negative regulation of endothelial cell proliferation;GO:0006470:protein dephosphorylation;GO:0007156:homophilic cell adhesion via plasma membrane adhesion molecules;GO:0007165:signal transduction;GO:0010596:negative regulation of endothelial cell migration;GO:0010842:retina layer formation;GO:0016525:negative regulation of angiogenesis;GO:0031175:neuron projection development;GO:00312…	GO:0005737:cytoplasm;GO:0005886:plasma membrane;GO:0005911:cell-cell junction;GO:0005913:cell-cell adherens junction;GO:0016021:integral component of membrane;GO:0030027:lamellipodium;GO:0048471:perinuclear region of cytoplasm;	GO:0004725:protein tyrosine phosphatase activity;GO:0005001:transmembrane receptor protein tyrosine phosphatase activity;GO:0042802:identical protein binding;GO:0045296:cadherin binding;	K05693
ENSMUSG00000042812	101.677	-4.76872	0.32904	-14.4928	1.34e-47	1.24e-45	8	121084386	121088144	+	Foxf1	forkhead box F1 [Source:MGI Symbol%3BAcc:MGI:1347470]	GO:0000122:negative regulation of transcription from RNA polymerase II promoter;GO:0001568:blood vessel development;GO:0001570:vasculogenesis;GO:0001701:in utero embryonic development;GO:0001756:somitogenesis;GO:0001763:morphogenesis of a branching structure;GO:0002053:positive regulation of mesenchymal cell proliferation;GO:0003197:endocardial cushion development;GO:0003214:cardiac left ventricl…	GO:0005634:nucleus;	GO:0000977:RNA polymerase II regulatory region sequence-specific DNA binding;GO:0001228:RNA polymerase II transcription regulatory region sequence-specific DNA binding transcription factor activity involved in positive regulation of transcription;GO:0003677:DNA binding;GO:0003705:RNA polymerase II distal enhancer sequence-specific DNA binding transcription factor activity;GO:0044212:transcription…	K09399
ENSMUSG00000021747	113.085	4.45139	0.307291	14.4859	1.49e-47	1.36e-45	14	8431192	8666240	-	4930452B06Rik	RIKEN cDNA 4930452B06 gene [Source:MGI Symbol%3BAcc:MGI:1926154]	-	-	-	-
ENSMUSG00000005124	3169.56	1.47705	0.102285	14.4405	2.88e-47	2.62e-45	15	66891320	66923201	+	Wisp1	WNT1 inducible signaling pathway protein 1 [Source:MGI Symbol%3BAcc:MGI:1197008]	GO:0001558:regulation of cell growth;GO:0007155:cell adhesion;GO:0007165:signal transduction;GO:0007267:cell-cell signaling;GO:0016055:Wnt signaling pathway;GO:0060548:negative regulation of cell death;	GO:0005578:proteinaceous extracellular matrix;GO:0005615:extracellular space;GO:0005829:cytosol;	GO:0005178:integrin binding;GO:0005520:insulin-like growth factor binding;GO:0008201:heparin binding;	-
ENSMUSG00000029121	110.149	5.45528	0.378553	14.4109	4.42e-47	4e-45	5	37241940	37292133	+	Crmp1	collapsin response mediator protein 1 [Source:MGI Symbol%3BAcc:MGI:107793]	GO:0000226:microtubule cytoskeleton organization;GO:0007411:axon guidance;GO:0010977:negative regulation of neuron projection development;GO:0071526:semaphorin-plexin signaling pathway;	GO:0005815:microtubule organizing center;GO:0005819:spindle;GO:0005829:cytosol;GO:0030425:dendrite;GO:0030426:growth cone;GO:0030496:midbody;GO:0031941:filamentous actin;GO:0043025:neuronal cell body;	GO:0016810:hydrolase activity, acting on carbon-nitrogen (but not peptide) bonds;GO:0031005:filamin binding;GO:0051219:phosphoprotein binding;	-
ENSMUSG00000027890	109.593	6.05424	0.420262	14.4059	4.75e-47	4.28e-45	3	108040408	108044894	-	Gstm4	glutathione S-transferase%2C mu 4 [Source:MGI Symbol%3BAcc:MGI:95862]	GO:0006749:glutathione metabolic process;GO:0018916:nitrobenzene metabolic process;GO:0042178:xenobiotic catabolic process;	GO:0005737:cytoplasm;GO:0005829:cytosol;	GO:0004364:glutathione transferase activity;GO:0019899:enzyme binding;GO:0042803:protein homodimerization activity;GO:0043295:glutathione binding;	K00799
ENSMUSG00000025584	142.877	-3.73401	0.259297	-14.4005	5.14e-47	4.61e-45	7	81213596	81334533	+	Pde8a	phosphodiesterase 8A [Source:MGI Symbol%3BAcc:MGI:1277116]	GO:0001934:positive regulation of protein phosphorylation;GO:0006198:cAMP catabolic process;GO:0007165:signal transduction;GO:0060548:negative regulation of cell death;GO:0070374:positive regulation of ERK1 and ERK2 cascade;GO:0071364:cellular response to epidermal growth factor stimulus;GO:1903206:negative regulation of hydrogen peroxide-induced cell death;	GO:0070062:extracellular exosome;	GO:0004115:3',5'-cyclic-AMP phosphodiesterase activity;GO:0019900:kinase binding;GO:0046872:metal ion binding;	K18437
ENSMUSG00000021806	374.138	2.58705	0.179834	14.3858	6.36e-47	5.68e-45	14	19751257	19811787	+	Nid2	nidogen 2 [Source:MGI Symbol%3BAcc:MGI:1298229]	GO:0007160:cell-matrix adhesion;GO:0030198:extracellular matrix organization;	GO:0005576:extracellular region;GO:0005578:proteinaceous extracellular matrix;GO:0005604:basement membrane;GO:0005615:extracellular space;GO:0005886:plasma membrane;GO:0031012:extracellular matrix;GO:0070062:extracellular exosome;	GO:0005509:calcium ion binding;GO:0005515:protein binding;	K06826
ENSMUSG00000042807	219.39	3.36676	0.234136	14.3795	6.96e-47	6.19e-45	1	53806876	54195168	-	Hecw2	HECT%2C C2 and WW domain containing E3 ubiquitin protein ligase 2 [Source:MGI Symbol%3BAcc:MGI:2685817]	GO:0030071:regulation of mitotic metaphase/anaphase transition;GO:0042787:protein ubiquitination involved in ubiquitin-dependent protein catabolic process;GO:0043161:proteasome-mediated ubiquitin-dependent protein catabolic process;	GO:0005737:cytoplasm;GO:0072686:mitotic spindle;	GO:0061630:ubiquitin protein ligase activity;	K12168
ENSMUSG00000000555	7410.23	1.78682	0.124287	14.3766	7.26e-47	6.42e-45	15	103344286	103366763	-	Itga5	integrin alpha 5 (fibronectin receptor alpha) [Source:MGI Symbol%3BAcc:MGI:96604]	GO:0007044:cell-substrate junction assembly;GO:0007157:heterophilic cell-cell adhesion via plasma membrane cell adhesion molecules;GO:0007159:leukocyte cell-cell adhesion;GO:0007229:integrin-mediated signaling pathway;GO:0007613:memory;GO:0010811:positive regulation of cell-substrate adhesion;GO:0030335:positive regulation of cell migration;GO:0031589:cell-substrate adhesion;GO:0033627:cell adhes…	GO:0005783:endoplasmic reticulum;GO:0005794:Golgi apparatus;GO:0005886:plasma membrane;GO:0005911:cell-cell junction;GO:0005925:focal adhesion;GO:0008305:integrin complex;GO:0009897:external side of plasma membrane;GO:0009986:cell surface;GO:0031410:cytoplasmic vesicle;GO:0032587:ruffle membrane;GO:0045202:synapse;	GO:0005154:epidermal growth factor receptor binding;GO:0005178:integrin binding;GO:0005515:protein binding;GO:0046872:metal ion binding;	K06484
ENSMUSG00000009097	110.683	-6.38549	0.444729	-14.3582	9.47e-47	8.34e-45	16	18581713	18586969	-	Tbx1	T-box 1 [Source:MGI Symbol%3BAcc:MGI:98493]	GO:0000122:negative regulation of transcription from RNA polymerase II promoter;GO:0001525:angiogenesis;GO:0001568:blood vessel development;GO:0001569:patterning of blood vessels;GO:0001708:cell fate specification;GO:0001755:neural crest cell migration;GO:0001934:positive regulation of protein phosphorylation;GO:0001945:lymph vessel development;GO:0001974:blood vessel remodeling;GO:0002053:positi…	GO:0005634:nucleus;	GO:0001162:RNA polymerase II intronic transcription regulatory region sequence-specific DNA binding;GO:0001228:RNA polymerase II transcription regulatory region sequence-specific DNA binding transcription factor activity involved in positive regulation of transcription;GO:0003677:DNA binding;GO:0005515:protein binding;GO:0042803:protein homodimerization activity;GO:0043565:sequence-specific DNA b…	K10175
ENSMUSG00000028527	147.624	-2.90534	0.202529	-14.3453	1.14e-46	1e-44	4	101419277	101466995	+	Ak4	adenylate kinase 4 [Source:MGI Symbol%3BAcc:MGI:87979]	GO:0001889:liver development;GO:0006165:nucleoside diphosphate phosphorylation;GO:0007420:brain development;GO:0009142:nucleoside triphosphate biosynthetic process;GO:0042493:response to drug;GO:0046033:AMP metabolic process;GO:0046034:ATP metabolic process;GO:0046039:GTP metabolic process;	GO:0005739:mitochondrion;GO:0005759:mitochondrial matrix;GO:0070062:extracellular exosome;	GO:0004017:adenylate kinase activity;GO:0004550:nucleoside diphosphate kinase activity;GO:0005524:ATP binding;GO:0005525:GTP binding;GO:0046899:nucleoside triphosphate adenylate kinase activity;	K00939
ENSMUSG00000029108	98.7172	5.25279	0.368003	14.2738	3.19e-46	2.78e-44	5	57717967	58133230	+	Pcdh7	protocadherin 7 [Source:MGI Symbol%3BAcc:MGI:1860487]	GO:0007156:homophilic cell adhesion via plasma membrane adhesion molecules;GO:0008150:biological_process;	GO:0005886:plasma membrane;GO:0005887:integral component of plasma membrane;	GO:0005509:calcium ion binding;GO:0005515:protein binding;	K16498
ENSMUSG00000022871	287.059	-2.86024	0.201066	-14.2254	6.38e-46	5.54e-44	16	22918382	22939766	+	Fetub	fetuin beta [Source:MGI Symbol%3BAcc:MGI:1890221]	GO:0007338:single fertilization;GO:0007339:binding of sperm to zona pellucida;GO:0010951:negative regulation of endopeptidase activity;	GO:0005576:extracellular region;GO:0070062:extracellular exosome;	GO:0004869:cysteine-type endopeptidase inhibitor activity;GO:0008191:metalloendopeptidase inhibitor activity;	-
ENSMUSG00000022665	605.278	1.62942	0.114626	14.215	7.39e-46	6.39e-44	16	45093402	45127924	+	Ccdc80	coiled-coil domain containing 80 [Source:MGI Symbol%3BAcc:MGI:1915146]	GO:0010811:positive regulation of cell-substrate adhesion;GO:0030198:extracellular matrix organization;	GO:0005578:proteinaceous extracellular matrix;GO:0005604:basement membrane;GO:0005614:interstitial matrix;GO:0005615:extracellular space;	GO:0001968:fibronectin binding;GO:0005539:glycosaminoglycan binding;GO:0008201:heparin binding;	-
ENSMUSG00000034586	116.341	-3.587	0.252363	-14.2137	7.54e-46	6.49e-44	11	115347707	115367756	-	Hid1	HID1 domain containing [Source:MGI Symbol%3BAcc:MGI:2445087]	GO:0006886:intracellular protein transport;GO:0031001:response to brefeldin A;	GO:0000138:Golgi trans cisterna;GO:0005737:cytoplasm;GO:0005794:Golgi apparatus;GO:0005797:Golgi medial cisterna;GO:0005829:cytosol;GO:0005881:cytoplasmic microtubule;GO:0016020:membrane;GO:0070062:extracellular exosome;GO:0090498:extrinsic component of Golgi membrane;	GO:0003674:molecular_function;	-
ENSMUSG00000028883	892.87	-2.01752	0.141989	-14.209	8.06e-46	6.91e-44	5	13125414	13602565	+	Sema3a	sema domain%2C immunoglobulin domain (Ig)%2C short basic domain%2C secreted%2C (semaphorin) 3A [Source:MGI Symbol%3BAcc:MGI:107558]	GO:0001764:neuron migration;GO:0002027:regulation of heart rate;GO:0006915:apoptotic process;GO:0007411:axon guidance;GO:0007413:axonal fasciculation;GO:0008045:motor neuron axon guidance;GO:0010633:negative regulation of epithelial cell migration;GO:0010977:negative regulation of neuron projection development;GO:0021612:facial nerve structural organization;GO:0021637:trigeminal nerve structural …	GO:0005576:extracellular region;GO:0005615:extracellular space;GO:0030424:axon;GO:0030425:dendrite;	GO:0030215:semaphorin receptor binding;GO:0038191:neuropilin binding;GO:0045499:chemorepellent activity;	K06840
ENSMUSG00000001552	1088.32	1.40186	0.0987191	14.2005	9.1e-46	7.76e-44	11	100368958	100397763	-	Jup	junction plakoglobin [Source:MGI Symbol%3BAcc:MGI:96650]	GO:0002159:desmosome assembly;GO:0007155:cell adhesion;GO:0007165:signal transduction;GO:0016337:single organismal cell-cell adhesion;GO:0016477:cell migration;GO:0034333:adherens junction assembly;GO:0042127:regulation of cell proliferation;GO:0042307:positive regulation of protein import into nucleus;GO:0043588:skin development;GO:0050982:detection of mechanical stimulus;GO:0051091:positive reg…	GO:0005634:nucleus;GO:0005737:cytoplasm;GO:0005829:cytosol;GO:0005882:intermediate filament;GO:0005886:plasma membrane;GO:0005911:cell-cell junction;GO:0005913:cell-cell adherens junction;GO:0005916:fascia adherens;GO:0005925:focal adhesion;GO:0009898:cytoplasmic side of plasma membrane;GO:0014704:intercalated disc;GO:0015629:actin cytoskeleton;GO:0016020:membrane;GO:0016327:apicolateral plasma m…	GO:0003713:transcription coactivator activity;GO:0004871:signal transducer activity;GO:0005198:structural molecule activity;GO:0005515:protein binding;GO:0019901:protein kinase binding;GO:0019903:protein phosphatase binding;GO:0045294:alpha-catenin binding;GO:0045296:cadherin binding;GO:0050839:cell adhesion molecule binding;	K10056
ENSMUSG00000025026	633.417	1.68813	0.11911	14.1729	1.35e-45	1.15e-43	19	53140445	53247399	+	Add3	adducin 3 (gamma) [Source:MGI Symbol%3BAcc:MGI:1351615]	-	GO:0000794:condensed nuclear chromosome;GO:0005654:nucleoplasm;GO:0005737:cytoplasm;GO:0005856:cytoskeleton;GO:0005886:plasma membrane;GO:0005903:brush border;GO:0005911:cell-cell junction;GO:0005938:cell cortex;GO:0014069:postsynaptic density;GO:0016020:membrane;	GO:0003779:actin binding;GO:0005198:structural molecule activity;GO:0005516:calmodulin binding;	K18622
ENSMUSG00000027236	1053.74	-1.89223	0.133588	-14.1647	1.52e-45	1.28e-43	2	122028546	122056598	+	Eif3j1	eukaryotic translation initiation factor 3%2C subunit J1 [Source:MGI Symbol%3BAcc:MGI:1925905]	GO:0006413:translational initiation;	GO:0005852:eukaryotic translation initiation factor 3 complex;	GO:0003743:translation initiation factor activity;	K03245
ENSMUSG00000034285	302.948	2.11956	0.149663	14.1622	1.57e-45	1.32e-43	11	4873951	4894200	+	Nipsnap1	nipsnap homolog 1 (C. elegans) [Source:MGI Symbol%3BAcc:MGI:1278344]	GO:0019233:sensory perception of pain;	GO:0005739:mitochondrion;GO:0005743:mitochondrial inner membrane;GO:0016020:membrane;GO:0097060:synaptic membrane;	GO:0005515:protein binding;GO:0042165:neurotransmitter binding;	-
ENSMUSG00000029797	248.125	2.5402	0.179381	14.161	1.6e-45	1.34e-43	6	48448229	48501250	+	Sspo	SCO-spondin [Source:MGI Symbol%3BAcc:MGI:2674311]	GO:0007155:cell adhesion;GO:0008150:biological_process;	GO:0005615:extracellular space;GO:0005737:cytoplasm;	GO:0003674:molecular_function;	-
ENSMUSG00000061013	102.848	5.96744	0.422725	14.1166	3e-45	2.51e-43	18	6910459	7004780	-	Mkx	mohawk homeobox [Source:MGI Symbol%3BAcc:MGI:2687286]	GO:0000122:negative regulation of transcription from RNA polymerase II promoter;GO:0002932:tendon sheath development;GO:0006366:transcription from RNA polymerase II promoter;GO:0007517:muscle organ development;GO:0010468:regulation of gene expression;GO:0010628:positive regulation of gene expression;GO:0030199:collagen fibril organization;GO:0032967:positive regulation of collagen biosynthetic pr…	GO:0005634:nucleus;GO:0005667:transcription factor complex;	GO:0000978:RNA polymerase II core promoter proximal region sequence-specific DNA binding;GO:0000981:sequence-specific DNA binding RNA polymerase II transcription factor activity;GO:0001077:RNA polymerase II core promoter proximal region sequence-specific DNA binding transcription factor activity involved in positive regulation of transcription;GO:0001078:RNA polymerase II core promoter proximal r…	-
ENSMUSG00000029672	1842.98	-1.47348	0.104574	-14.0903	4.35e-45	3.62e-43	6	22306520	22356243	-	Fam3c	family with sequence similarity 3%2C member C [Source:MGI Symbol%3BAcc:MGI:107892]	GO:0007275:multicellular organismal development;GO:0008150:biological_process;	GO:0005615:extracellular space;GO:0031410:cytoplasmic vesicle;GO:0070062:extracellular exosome;	GO:0003674:molecular_function;	-
ENSMUSG00000030468	356.562	1.94191	0.138028	14.0689	5.9e-45	4.88e-43	7	43408204	43418358	+	Siglecg	sialic acid binding Ig-like lectin G [Source:MGI Symbol%3BAcc:MGI:2443630]	GO:0002244:hematopoietic progenitor cell differentiation;	GO:0016021:integral component of membrane;	GO:0005515:protein binding;	K06749
ENSMUSG00000031601	3698.96	-1.14418	0.0813908	-14.0579	6.89e-45	5.68e-43	8	40492540	40515847	-	Cnot7	CCR4-NOT transcription complex%2C subunit 7 [Source:MGI Symbol%3BAcc:MGI:1298230]	GO:0000122:negative regulation of transcription from RNA polymerase II promoter;GO:0000289:nuclear-transcribed mRNA poly(A) tail shortening;GO:0000290:deadenylation-dependent decapping of nuclear-transcribed mRNA;GO:0006351:transcription, DNA-templated;GO:0008284:positive regulation of cell proliferation;GO:0008285:negative regulation of cell proliferation;GO:0010629:negative regulation of gene e…	GO:0000932:cytoplasmic mRNA processing body;GO:0005634:nucleus;GO:0005737:cytoplasm;GO:0016020:membrane;GO:0016604:nuclear body;GO:0016607:nuclear speck;GO:0030014:CCR4-NOT complex;GO:0030015:CCR4-NOT core complex;GO:0075341:host cell PML body;	GO:0000175:3'-5'-exoribonuclease activity;GO:0001191:RNA polymerase II transcription factor binding transcription factor activity involved in negative regulation of transcription;GO:0003723:RNA binding;GO:0004532:exoribonuclease activity;GO:0004535:poly(A)-specific ribonuclease activity;GO:0005515:protein binding;GO:0008134:transcription factor binding;GO:0046872:metal ion binding;	K12581
ENSMUSG00000104222	106.476	4.15068	0.295796	14.0322	9.9e-45	8.12e-43	6	117716342	117718868	+	Gm7292	predicted gene 7292 [Source:MGI Symbol%3BAcc:MGI:3645786]	-	-	-	-
ENSMUSG00000021185	118.06	6.32687	0.452008	13.9972	1.62e-44	1.32e-42	12	100779057	100896981	+	9030617O03Rik	RIKEN cDNA 9030617O03 gene [Source:MGI Symbol%3BAcc:MGI:2444813]	-	-	-	-
ENSMUSG00000020806	488.399	-2.28183	0.163044	-13.9952	1.67e-44	1.36e-42	11	116598165	116627019	-	Rhbdf2	rhomboid 5 homolog 2 [Source:MGI Symbol%3BAcc:MGI:2442473]	GO:0015031:protein transport;GO:0016485:protein processing;GO:0042058:regulation of epidermal growth factor receptor signaling pathway;GO:0050709:negative regulation of protein secretion;	GO:0005789:endoplasmic reticulum membrane;GO:0005886:plasma membrane;GO:0016021:integral component of membrane;	GO:0004252:serine-type endopeptidase activity;	-
ENSMUSG00000027820	102.912	6.26144	0.448441	13.9627	2.63e-44	2.13e-42	3	63241537	63386030	+	Mme	membrane metallo endopeptidase [Source:MGI Symbol%3BAcc:MGI:97004]	GO:0001822:kidney development;GO:0006508:proteolysis;GO:0006518:peptide metabolic process;GO:0019233:sensory perception of pain;GO:0046449:creatinine metabolic process;GO:0050435:beta-amyloid metabolic process;GO:0071345:cellular response to cytokine stimulus;GO:0071492:cellular response to UV-A;GO:0071493:cellular response to UV-B;GO:0090399:replicative senescence;	GO:0005737:cytoplasm;GO:0005886:plasma membrane;GO:0005903:brush border;GO:0005925:focal adhesion;GO:0008021:synaptic vesicle;GO:0016020:membrane;GO:0016021:integral component of membrane;GO:0030424:axon;GO:0030425:dendrite;GO:0044306:neuron projection terminus;GO:0045202:synapse;GO:0070062:extracellular exosome;	GO:0004175:endopeptidase activity;GO:0004222:metalloendopeptidase activity;GO:0008233:peptidase activity;GO:0008237:metallopeptidase activity;GO:0008238:exopeptidase activity;GO:0008270:zinc ion binding;GO:0042277:peptide binding;	K01389
ENSMUSG00000051166	200.072	-2.88422	0.206686	-13.9546	2.95e-44	2.38e-42	12	98786805	98901484	-	Eml5	echinoderm microtubule associated protein like 5 [Source:MGI Symbol%3BAcc:MGI:2442513]	GO:0008150:biological_process;	GO:0005737:cytoplasm;GO:0005874:microtubule;GO:0015630:microtubule cytoskeleton;GO:0070062:extracellular exosome;	GO:0008017:microtubule binding;	K18597
ENSMUSG00000022610	371.913	2.06857	0.148279	13.9506	3.12e-44	2.51e-42	15	89130585	89140703	-	Mapk12	mitogen-activated protein kinase 12 [Source:MGI Symbol%3BAcc:MGI:1353438]	GO:0000165:MAPK cascade;GO:0006351:transcription, DNA-templated;GO:0006355:regulation of transcription, DNA-templated;GO:0007005:mitochondrion organization;GO:0007049:cell cycle;GO:0010468:regulation of gene expression;GO:0018105:peptidyl-serine phosphorylation;GO:0045445:myoblast differentiation;GO:0045786:negative regulation of cell cycle;	GO:0005634:nucleus;GO:0005654:nucleoplasm;GO:0005737:cytoplasm;GO:0005739:mitochondrion;	GO:0000287:magnesium ion binding;GO:0004674:protein serine/threonine kinase activity;GO:0004707:MAP kinase activity;GO:0005524:ATP binding;	K04441
ENSMUSG00000041556	132.936	-3.32144	0.238168	-13.9458	3.34e-44	2.67e-42	4	148160621	148166424	+	Fbxo2	F-box protein 2 [Source:MGI Symbol%3BAcc:MGI:2446216]	GO:0006511:ubiquitin-dependent protein catabolic process;GO:0006516:glycoprotein catabolic process;GO:0008285:negative regulation of cell proliferation;GO:0016567:protein ubiquitination;GO:0030433:ER-associated ubiquitin-dependent protein catabolic process;GO:0031146:SCF-dependent proteasomal ubiquitin-dependent protein catabolic process;GO:0031396:regulation of protein ubiquitination;	GO:0005737:cytoplasm;GO:0005783:endoplasmic reticulum;GO:0005829:cytosol;GO:0019005:SCF ubiquitin ligase complex;GO:0031090:organelle membrane;GO:0043197:dendritic spine;GO:0070062:extracellular exosome;	GO:0001540:beta-amyloid binding;GO:0001948:glycoprotein binding;GO:0004842:ubiquitin-protein transferase activity;GO:0005515:protein binding;GO:0030246:carbohydrate binding;	K10099
ENSMUSG00000039395	115.422	-3.60901	0.25888	-13.9409	3.58e-44	2.85e-42	1	72159442	72212307	-	Mreg	melanoregulin [Source:MGI Symbol%3BAcc:MGI:2151839]	GO:0030318:melanocyte differentiation;GO:0032402:melanosome transport;GO:0043473:pigmentation;GO:0048066:developmental pigmentation;	GO:0016324:apical plasma membrane;GO:0042470:melanosome;GO:0043234:protein complex;	GO:0005515:protein binding;	-
ENSMUSG00000024782	794.437	1.55732	0.111908	13.916	5.07e-44	4.02e-42	19	29020833	29047961	-	Ak3	adenylate kinase 3 [Source:MGI Symbol%3BAcc:MGI:1860835]	GO:0046033:AMP metabolic process;GO:0046039:GTP metabolic process;GO:0046041:ITP metabolic process;GO:0046051:UTP metabolic process;GO:0046939:nucleotide phosphorylation;	GO:0005739:mitochondrion;GO:0005759:mitochondrial matrix;	GO:0004017:adenylate kinase activity;GO:0005524:ATP binding;GO:0005525:GTP binding;GO:0046899:nucleoside triphosphate adenylate kinase activity;	K00944
ENSMUSG00000027962	1121.39	-1.35949	0.0977853	-13.9028	6.09e-44	4.81e-42	3	116109949	116129688	-	Vcam1	vascular cell adhesion molecule 1 [Source:MGI Symbol%3BAcc:MGI:98926]	GO:0007155:cell adhesion;GO:0007157:heterophilic cell-cell adhesion via plasma membrane cell adhesion molecules;GO:0007159:leukocyte cell-cell adhesion;GO:0007160:cell-matrix adhesion;GO:0007507:heart development;GO:0009308:amine metabolic process;GO:0016032:viral process;GO:0035584:calcium-mediated signaling using intracellular calcium source;GO:0042102:positive regulation of T cell proliferatio…	GO:0002102:podosome;GO:0005615:extracellular space;GO:0005769:early endosome;GO:0005783:endoplasmic reticulum;GO:0005794:Golgi apparatus;GO:0005902:microvillus;GO:0009897:external side of plasma membrane;GO:0009986:cell surface;GO:0016021:integral component of membrane;GO:0030175:filopodium;GO:0031225:anchored component of membrane;GO:0045177:apical part of cell;GO:0070062:extracellular exosome;G…	GO:0005178:integrin binding;GO:0008131:primary amine oxidase activity;GO:0050839:cell adhesion molecule binding;	-
ENSMUSG00000028551	974.241	-1.59937	0.115196	-13.884	7.92e-44	6.24e-42	4	109660876	109667189	-	Cdkn2c	cyclin-dependent kinase inhibitor 2C (p18%2C inhibits CDK4) [Source:MGI Symbol%3BAcc:MGI:105388]	GO:0000079:regulation of cyclin-dependent protein serine/threonine kinase activity;GO:0000082:G1/S transition of mitotic cell cycle;GO:0007050:cell cycle arrest;GO:0008285:negative regulation of cell proliferation;GO:0030308:negative regulation of cell growth;GO:0042326:negative regulation of phosphorylation;GO:0045736:negative regulation of cyclin-dependent protein serine/threonine kinase activi…	GO:0005634:nucleus;GO:0005737:cytoplasm;	GO:0004861:cyclin-dependent protein serine/threonine kinase inhibitor activity;GO:0019901:protein kinase binding;	K06622
ENSMUSG00000064210	2506.54	1.30665	0.0941182	13.8831	8.02e-44	6.29e-42	15	95790843	95975464	+	Ano6	anoctamin 6 [Source:MGI Symbol%3BAcc:MGI:2145890]	GO:0002407:dendritic cell chemotaxis;GO:0002543:activation of blood coagulation via clotting cascade;GO:0006812:cation transport;GO:0006821:chloride transport;GO:0006869:lipid transport;GO:0007596:blood coagulation;GO:0017121:phospholipid scrambling;GO:0030501:positive regulation of bone mineralization;GO:0032060:bleb assembly;GO:0034767:positive regulation of ion transmembrane transport;GO:00355…	GO:0005622:intracellular;GO:0005829:cytosol;GO:0005886:plasma membrane;GO:0009986:cell surface;GO:0016020:membrane;GO:0034707:chloride channel complex;GO:0070062:extracellular exosome;	GO:0005227:calcium activated cation channel activity;GO:0005229:intracellular calcium activated chloride channel activity;GO:0005244:voltage-gated ion channel activity;GO:0005247:voltage-gated chloride channel activity;GO:0017128:phospholipid scramblase activity;GO:0042803:protein homodimerization activity;	K19500
ENSMUSG00000017400	104.235	-4.46661	0.321764	-13.8817	8.18e-44	6.39e-42	11	98036623	98053462	-	Stac2	SH3 and cysteine rich domain 2 [Source:MGI Symbol%3BAcc:MGI:2144518]	GO:0008150:biological_process;GO:0035556:intracellular signal transduction;	GO:0005575:cellular_component;GO:0005622:intracellular;	GO:0003674:molecular_function;GO:0046872:metal ion binding;	-
ENSMUSG00000024803	3682.39	-1.93988	0.139986	-13.8576	1.14e-43	8.9e-42	19	36111965	36119844	-	Ankrd1	ankyrin repeat domain 1 (cardiac muscle) [Source:MGI Symbol%3BAcc:MGI:1097717]	GO:0000122:negative regulation of transcription from RNA polymerase II promoter;GO:0006357:regulation of transcription from RNA polymerase II promoter;GO:0010976:positive regulation of neuron projection development;GO:0035690:cellular response to drug;GO:0035914:skeletal muscle cell differentiation;GO:0035994:response to muscle stretch;GO:0043065:positive regulation of apoptotic process;GO:004351…	GO:0001650:fibrillar center;GO:0005634:nucleus;GO:0005667:transcription factor complex;GO:0005737:cytoplasm;GO:0005829:cytosol;GO:0030016:myofibril;GO:0031674:I band;	GO:0001085:RNA polymerase II transcription factor binding;GO:0001105:RNA polymerase II transcription coactivator activity;GO:0002039:p53 binding;GO:0003677:DNA binding;GO:0003714:transcription corepressor activity;GO:0005515:protein binding;GO:0031432:titin binding;GO:0042826:histone deacetylase binding;GO:0061629:RNA polymerase II sequence-specific DNA binding transcription factor binding;GO:007…	K21433
ENSMUSG00000035783	7333.57	1.52607	0.110341	13.8305	1.67e-43	1.29e-41	19	34241090	34255336	-	Acta2	actin%2C alpha 2%2C smooth muscle%2C aorta [Source:MGI Symbol%3BAcc:MGI:87909]	GO:0008217:regulation of blood pressure;GO:0009615:response to virus;GO:0010628:positive regulation of gene expression;GO:0014829:vascular smooth muscle contraction;GO:0072144:glomerular mesangial cell development;GO:0090131:mesenchyme migration;	GO:0005615:extracellular space;GO:0005737:cytoplasm;GO:0005856:cytoskeleton;GO:0015629:actin cytoskeleton;GO:0030027:lamellipodium;GO:0030175:filopodium;GO:0030485:smooth muscle contractile fiber;GO:0043234:protein complex;GO:0044297:cell body;GO:0070062:extracellular exosome;	GO:0005515:protein binding;GO:0005524:ATP binding;GO:0019901:protein kinase binding;	K12313
ENSMUSG00000022206	112.335	3.44833	0.249842	13.802	2.48e-43	1.91e-41	15	11839896	11905674	-	Npr3	natriuretic peptide receptor 3 [Source:MGI Symbol%3BAcc:MGI:97373]	GO:0001501:skeletal system development;GO:0002158:osteoclast proliferation;GO:0007193:adenylate cyclase-inhibiting G-protein coupled receptor signaling pathway;GO:0007194:negative regulation of adenylate cyclase activity;GO:0007200:phospholipase C-activating G-protein coupled receptor signaling pathway;GO:0008217:regulation of blood pressure;GO:0030157:pancreatic juice secretion;GO:0033688:regula…	GO:0005622:intracellular;GO:0016021:integral component of membrane;GO:0043234:protein complex;GO:0070062:extracellular exosome;	GO:0008528:G-protein coupled peptide receptor activity;GO:0016941:natriuretic peptide receptor activity;GO:0017046:peptide hormone binding;GO:0031404:chloride ion binding;GO:0042277:peptide binding;GO:0042562:hormone binding;GO:0042803:protein homodimerization activity;	K12325
ENSMUSG00000037860	157.525	-2.97479	0.215634	-13.7956	2.71e-43	2.08e-41	1	173350879	173466040	+	Aim2	absent in melanoma 2 [Source:MGI Symbol%3BAcc:MGI:2686159]	GO:0002218:activation of innate immune response;GO:0002230:positive regulation of defense response to virus by host;GO:0006915:apoptotic process;GO:0006954:inflammatory response;GO:0032088:negative regulation of NF-kappaB transcription factor activity;GO:0032461:positive regulation of protein oligomerization;GO:0032731:positive regulation of interleukin-1 beta production;GO:0033209:tumor necrosis…	GO:0005654:nucleoplasm;GO:0005737:cytoplasm;GO:0005739:mitochondrion;GO:0005829:cytosol;GO:0097169:AIM2 inflammasome complex;	GO:0003690:double-stranded DNA binding;GO:0005515:protein binding;GO:0042802:identical protein binding;	K12966
ENSMUSG00000008398	1256.08	1.20944	0.0877036	13.7901	2.93e-43	2.24e-41	10	93247414	93311135	-	Elk3	ELK3%2C member of ETS oncogene family [Source:MGI Symbol%3BAcc:MGI:101762]	GO:0001525:angiogenesis;GO:0006355:regulation of transcription, DNA-templated;GO:0006357:regulation of transcription from RNA polymerase II promoter;GO:0006366:transcription from RNA polymerase II promoter;GO:0030154:cell differentiation;GO:0042060:wound healing;GO:0045892:negative regulation of transcription, DNA-templated;GO:0045893:positive regulation of transcription, DNA-templated;GO:0045944…	GO:0005634:nucleus;GO:0005654:nucleoplasm;GO:0005737:cytoplasm;GO:0005739:mitochondrion;	GO:0000978:RNA polymerase II core promoter proximal region sequence-specific DNA binding;GO:0000981:sequence-specific DNA binding RNA polymerase II transcription factor activity;GO:0001077:RNA polymerase II core promoter proximal region sequence-specific DNA binding transcription factor activity involved in positive regulation of transcription;GO:0003677:DNA binding;GO:0003700:sequence-specific D…	K04375
ENSMUSG00000039814	88.2295	4.4885	0.32605	13.7663	4.07e-43	3.1e-41	8	18932729	18950975	-	Xkr5	X-linked Kx blood group related 5 [Source:MGI Symbol%3BAcc:MGI:2442327]	GO:0008150:biological_process;	GO:0016021:integral component of membrane;	GO:0003674:molecular_function;	-
ENSMUSG00000019278	93.3132	-5.16127	0.375603	-13.7413	5.74e-43	4.36e-41	8	123186242	123201812	+	Dpep1	dipeptidase 1 (renal) [Source:MGI Symbol%3BAcc:MGI:94917]	GO:0006508:proteolysis;GO:0006915:apoptotic process;GO:0016999:antibiotic metabolic process;GO:0030336:negative regulation of cell migration;GO:0035690:cellular response to drug;GO:0043066:negative regulation of apoptotic process;GO:0043154:negative regulation of cysteine-type endopeptidase activity involved in apoptotic process;GO:0050667:homocysteine metabolic process;GO:0071277:cellular respon…	GO:0005615:extracellular space;GO:0005634:nucleus;GO:0005886:plasma membrane;GO:0016324:apical plasma membrane;GO:0030054:cell junction;GO:0031225:anchored component of membrane;GO:0031528:microvillus membrane;GO:0045177:apical part of cell;GO:0070062:extracellular exosome;	GO:0008239:dipeptidyl-peptidase activity;GO:0008270:zinc ion binding;GO:0016805:dipeptidase activity;GO:0034235:GPI anchor binding;GO:0043027:cysteine-type endopeptidase inhibitor activity involved in apoptotic process;GO:0070573:metallodipeptidase activity;GO:0072341:modified amino acid binding;	K01273
ENSMUSG00000009614	503.307	1.55587	0.113906	13.6592	1.78e-42	1.35e-40	2	27188393	27248337	-	Sardh	sarcosine dehydrogenase [Source:MGI Symbol%3BAcc:MGI:2183102]	GO:0055114:oxidation-reduction process;GO:1901053:sarcosine catabolic process;	GO:0005739:mitochondrion;GO:0005759:mitochondrial matrix;	GO:0008480:sarcosine dehydrogenase activity;	K00314
ENSMUSG00000039578	89.1924	4.25432	0.311702	13.6487	2.06e-42	1.55e-40	6	61180324	62382865	+	Ccser1	coiled-coil serine rich 1 [Source:MGI Symbol%3BAcc:MGI:3045354]	GO:0008150:biological_process;	GO:0005575:cellular_component;	GO:0003674:molecular_function;	-
ENSMUSG00000026463	133.909	4.45826	0.32712	13.6288	2.7e-42	2.03e-40	1	133699457	133801041	-	Atp2b4	ATPase%2C Ca++ transporting%2C plasma membrane 4 [Source:MGI Symbol%3BAcc:MGI:88111]	GO:0003407:neural retina development;GO:0006357:regulation of transcription from RNA polymerase II promoter;GO:0006816:calcium ion transport;GO:0006874:cellular calcium ion homeostasis;GO:0007283:spermatogenesis;GO:0010751:negative regulation of nitric oxide mediated signal transduction;GO:0021766:hippocampus development;GO:0030317:sperm motility;GO:0033138:positive regulation of peptidyl-serine …	GO:0005886:plasma membrane;GO:0005887:integral component of plasma membrane;GO:0016020:membrane;GO:0016323:basolateral plasma membrane;GO:0030018:Z disc;GO:0030315:T-tubule;GO:0036126:sperm flagellum;GO:0042383:sarcolemma;GO:0043005:neuron projection;GO:0043231:intracellular membrane-bounded organelle;GO:0097228:sperm principal piece;	GO:0005388:calcium-transporting ATPase activity;GO:0005516:calmodulin binding;GO:0005524:ATP binding;GO:0019901:protein kinase binding;GO:0030165:PDZ domain binding;GO:0030346:protein phosphatase 2B binding;GO:0036487:nitric-oxide synthase inhibitor activity;GO:0046872:metal ion binding;GO:0050998:nitric-oxide synthase binding;	K05850
ENSMUSG00000005897	228.787	2.68726	0.197245	13.6239	2.89e-42	2.16e-40	10	94148023	94197211	+	Nr2c1	nuclear receptor subfamily 2%2C group C%2C member 1 [Source:MGI Symbol%3BAcc:MGI:1352465]	GO:0000122:negative regulation of transcription from RNA polymerase II promoter;GO:0006351:transcription, DNA-templated;GO:0043401:steroid hormone mediated signaling pathway;GO:0045892:negative regulation of transcription, DNA-templated;GO:0048386:positive regulation of retinoic acid receptor signaling pathway;	GO:0005634:nucleus;GO:0016605:PML body;	GO:0000978:RNA polymerase II core promoter proximal region sequence-specific DNA binding;GO:0001078:RNA polymerase II core promoter proximal region sequence-specific DNA binding transcription factor activity involved in negative regulation of transcription;GO:0003677:DNA binding;GO:0003707:steroid hormone receptor activity;GO:0005515:protein binding;GO:0008270:zinc ion binding;GO:0042803:protein …	K08543
ENSMUSG00000022389	2030.13	1.21118	0.0890445	13.6019	3.9e-42	2.9e-40	15	81802421	81826861	+	Tef	thyrotroph embryonic factor [Source:MGI Symbol%3BAcc:MGI:98663]	GO:0006366:transcription from RNA polymerase II promoter;GO:0007275:multicellular organismal development;GO:0045944:positive regulation of transcription from RNA polymerase II promoter;GO:0048511:rhythmic process;	GO:0005634:nucleus;	GO:0000977:RNA polymerase II regulatory region sequence-specific DNA binding;GO:0001077:RNA polymerase II core promoter proximal region sequence-specific DNA binding transcription factor activity involved in positive regulation of transcription;GO:0003690:double-stranded DNA binding;	K09058
ENSMUSG00000039058	368.467	1.96721	0.144915	13.5749	5.64e-42	4.19e-40	3	152462815	152668360	-	Ak5	adenylate kinase 5 [Source:MGI Symbol%3BAcc:MGI:2677491]	GO:0006165:nucleoside diphosphate phosphorylation;GO:0009142:nucleoside triphosphate biosynthetic process;GO:0009165:nucleotide biosynthetic process;GO:0046034:ATP metabolic process;	GO:0005815:microtubule organizing center;GO:0005829:cytosol;	GO:0004017:adenylate kinase activity;GO:0004550:nucleoside diphosphate kinase activity;GO:0005524:ATP binding;GO:0019206:nucleoside kinase activity;	K13800
ENSMUSG00000031841	88.5746	-5.92719	0.440625	-13.4518	3e-41	2.22e-39	8	118283733	119324921	+	Cdh13	cadherin 13 [Source:MGI Symbol%3BAcc:MGI:99551]	GO:0000278:mitotic cell cycle;GO:0001938:positive regulation of endothelial cell proliferation;GO:0001954:positive regulation of cell-matrix adhesion;GO:0002040:sprouting angiogenesis;GO:0007156:homophilic cell adhesion via plasma membrane adhesion molecules;GO:0007162:negative regulation of cell adhesion;GO:0007266:Rho protein signal transduction;GO:0008285:negative regulation of cell proliferat…	GO:0005615:extracellular space;GO:0005737:cytoplasm;GO:0005886:plasma membrane;GO:0005901:caveola;GO:0005925:focal adhesion;GO:0009897:external side of plasma membrane;GO:0031225:anchored component of membrane;GO:0043005:neuron projection;GO:0048471:perinuclear region of cytoplasm;GO:0070062:extracellular exosome;	GO:0005509:calcium ion binding;GO:0005515:protein binding;GO:0030169:low-density lipoprotein particle binding;GO:0042803:protein homodimerization activity;GO:0045296:cadherin binding;GO:0055100:adiponectin binding;GO:0071813:lipoprotein particle binding;	K06808
ENSMUSG00000011154	90.8632	-3.86351	0.287681	-13.4299	4.04e-41	2.98e-39	7	83774101	83794880	-	Cfap161	cilia and flagella associated protein 161 [Source:MGI Symbol%3BAcc:MGI:1922806]	GO:0008150:biological_process;	GO:0005575:cellular_component;GO:0016020:membrane;	GO:0003674:molecular_function;	-
ENSMUSG00000061731	1999.5	1.17667	0.0877977	13.4021	5.88e-41	4.31e-39	15	53064038	53346159	-	Ext1	exostoses (multiple) 1 [Source:MGI Symbol%3BAcc:MGI:894663]	GO:0001503:ossification;GO:0006024:glycosaminoglycan biosynthetic process;GO:0006486:protein glycosylation;GO:0007369:gastrulation;GO:0007411:axon guidance;GO:0007420:brain development;GO:0007492:endoderm development;GO:0007498:mesoderm development;GO:0015012:heparan sulfate proteoglycan biosynthetic process;GO:0015014:heparan sulfate proteoglycan biosynthetic process, polysaccharide chain biosyn…	GO:0000139:Golgi membrane;GO:0005783:endoplasmic reticulum;GO:0005794:Golgi apparatus;GO:0030176:integral component of endoplasmic reticulum membrane;	GO:0008375:acetylglucosaminyltransferase activity;GO:0015020:glucuronosyltransferase activity;GO:0016757:transferase activity, transferring glycosyl groups;GO:0042803:protein homodimerization activity;GO:0046872:metal ion binding;GO:0046982:protein heterodimerization activity;GO:0050508:glucuronosyl-N-acetylglucosaminyl-proteoglycan 4-alpha-N-acetylglucosaminyltransferase activity;GO:0050509:N-ac…	K02366;K02370
ENSMUSG00000055322	1113.7	2.97692	0.22216	13.3999	6.05e-41	4.42e-39	1	73910231	74124449	-	Tns1	tensin 1 [Source:MGI Symbol%3BAcc:MGI:104552]	GO:0007044:cell-substrate junction assembly;GO:0010761:fibroblast migration;GO:0035556:intracellular signal transduction;	GO:0005622:intracellular;GO:0005925:focal adhesion;GO:0030055:cell-substrate junction;	GO:0003723:RNA binding;GO:0003779:actin binding;	K18080
ENSMUSG00000082229	247.841	2.13685	0.160059	13.3504	1.18e-40	8.57e-39	X	103184176	103186640	-	Nap1l2	nucleosome assembly protein 1-like 2 [Source:MGI Symbol%3BAcc:MGI:106654]	GO:0006334:nucleosome assembly;GO:0035066:positive regulation of histone acetylation;GO:0045666:positive regulation of neuron differentiation;GO:0071442:positive regulation of histone H3-K14 acetylation;GO:2000035:regulation of stem cell division;GO:2000617:positive regulation of histone H3-K9 acetylation;	GO:0005634:nucleus;	GO:0003682:chromatin binding;GO:0005515:protein binding;GO:0042393:histone binding;	K11280
ENSMUSG00000029651	82.5402	5.19944	0.390168	13.3262	1.63e-40	1.18e-38	5	147957320	148316065	+	Mtus2	microtubule associated tumor suppressor candidate 2 [Source:MGI Symbol%3BAcc:MGI:1915388]	-	GO:0005634:nucleus;GO:0005813:centrosome;GO:0005881:cytoplasmic microtubule;GO:0015630:microtubule cytoskeleton;GO:0045171:intercellular bridge;	GO:0008017:microtubule binding;GO:0042803:protein homodimerization activity;	-
ENSMUSG00000043067	1641.13	-1.10745	0.0834591	-13.2694	3.48e-40	2.52e-38	9	24411776	24503140	-	Dpy19l1	dpy-19-like 1 (C. elegans) [Source:MGI Symbol%3BAcc:MGI:1915685]	GO:0018406:protein C-linked glycosylation via 2'-alpha-mannosyl-L-tryptophan;	GO:0005637:nuclear inner membrane;GO:0016020:membrane;GO:0016021:integral component of membrane;	GO:0000030:mannosyltransferase activity;	-
ENSMUSG00000029311	504.86	1.57739	0.119116	13.2425	4.99e-40	3.59e-38	5	103989762	104021919	-	Hsd17b11	hydroxysteroid (17-beta) dehydrogenase 11 [Source:MGI Symbol%3BAcc:MGI:2149821]	GO:0006694:steroid biosynthetic process;GO:0006710:androgen catabolic process;GO:0055114:oxidation-reduction process;	GO:0005576:extracellular region;GO:0005737:cytoplasm;GO:0005811:lipid particle;	GO:0004303:estradiol 17-beta-dehydrogenase activity;GO:0016229:steroid dehydrogenase activity;	-
ENSMUSG00000023460	1355.14	-1.45977	0.110479	-13.2131	7.38e-40	5.29e-38	17	66494512	66519717	-	Rab12	RAB12%2C member RAS oncogene family [Source:MGI Symbol%3BAcc:MGI:894284]	GO:0006914:autophagy;GO:0008333:endosome to lysosome transport;GO:0015031:protein transport;GO:0016239:positive regulation of macroautophagy;GO:0044257:cellular protein catabolic process;	GO:0000139:Golgi membrane;GO:0005764:lysosome;GO:0005765:lysosomal membrane;GO:0005776:autophagosome;GO:0005794:Golgi apparatus;GO:0055038:recycling endosome membrane;	GO:0003924:GTPase activity;GO:0005525:GTP binding;GO:0019003:GDP binding;	K07907
ENSMUSG00000039031	205.802	2.39408	0.181514	13.1896	1.01e-39	7.2e-38	10	26753421	26918648	+	Arhgap18	Rho GTPase activating protein 18 [Source:MGI Symbol%3BAcc:MGI:1921160]	GO:0007264:small GTPase mediated signal transduction;GO:0008360:regulation of cell shape;GO:0030833:regulation of actin filament polymerization;GO:0032956:regulation of actin cytoskeleton organization;GO:0043547:positive regulation of GTPase activity;GO:0051056:regulation of small GTPase mediated signal transduction;GO:2000145:regulation of cell motility;	GO:0005737:cytoplasm;GO:0005829:cytosol;GO:0005886:plasma membrane;GO:0016607:nuclear speck;	GO:0005096:GTPase activator activity;GO:0045296:cadherin binding;	K20639
ENSMUSG00000024431	1725.06	1.56454	0.118645	13.1868	1.05e-39	7.44e-38	18	39410545	39491301	-	Nr3c1	nuclear receptor subfamily 3%2C group C%2C member 1 [Source:MGI Symbol%3BAcc:MGI:95824]	GO:0000122:negative regulation of transcription from RNA polymerase II promoter;GO:0006111:regulation of gluconeogenesis;GO:0006351:transcription, DNA-templated;GO:0006355:regulation of transcription, DNA-templated;GO:0006366:transcription from RNA polymerase II promoter;GO:0008211:glucocorticoid metabolic process;GO:0016569:covalent chromatin modification;GO:0030325:adrenal gland development;GO:…	GO:0005622:intracellular;GO:0005634:nucleus;GO:0005654:nucleoplasm;GO:0005737:cytoplasm;GO:0005739:mitochondrion;GO:0005815:microtubule organizing center;GO:0005819:spindle;GO:0005829:cytosol;GO:0016020:membrane;GO:0043234:protein complex;	GO:0000978:RNA polymerase II core promoter proximal region sequence-specific DNA binding;GO:0001047:core promoter binding;GO:0001077:RNA polymerase II core promoter proximal region sequence-specific DNA binding transcription factor activity involved in positive regulation of transcription;GO:0003677:DNA binding;GO:0003700:sequence-specific DNA binding transcription factor activity;GO:0004883:gluc…	K05771
ENSMUSG00000003378	641.242	1.47694	0.112548	13.1227	2.44e-39	1.73e-37	7	25009849	25072346	-	Grik5	glutamate receptor%2C ionotropic%2C kainate 5 (gamma 2) [Source:MGI Symbol%3BAcc:MGI:95818]	GO:0006621:protein retention in ER lumen;GO:0031630:regulation of synaptic vesicle fusion to presynaptic membrane;GO:0035235:ionotropic glutamate receptor signaling pathway;GO:0035249:synaptic transmission, glutamatergic;GO:0035725:sodium ion transmembrane transport;GO:0042391:regulation of membrane potential;GO:0043113:receptor clustering;GO:0043525:positive regulation of neuron apoptotic proces…	GO:0005783:endoplasmic reticulum;GO:0014069:postsynaptic density;GO:0016020:membrane;GO:0030054:cell junction;GO:0030425:dendrite;GO:0032983:kainate selective glutamate receptor complex;GO:0042734:presynaptic membrane;GO:0043195:terminal bouton;GO:0043204:perikaryon;GO:0045211:postsynaptic membrane;	GO:0005234:extracellular-glutamate-gated ion channel activity;GO:0005515:protein binding;GO:0015277:kainate selective glutamate receptor activity;GO:0017124:SH3 domain binding;GO:0030165:PDZ domain binding;GO:0042802:identical protein binding;	K05205
ENSMUSG00000000567	1143.21	-1.73957	0.132653	-13.1137	2.75e-39	1.94e-37	11	112782224	112787760	+	Sox9	SRY (sex determining region Y)-box 9 [Source:MGI Symbol%3BAcc:MGI:98371]	GO:0000122:negative regulation of transcription from RNA polymerase II promoter;GO:0001501:skeletal system development;GO:0001502:cartilage condensation;GO:0001503:ossification;GO:0001658:branching involved in ureteric bud morphogenesis;GO:0001708:cell fate specification;GO:0001837:epithelial to mesenchymal transition;GO:0001894:tissue homeostasis;GO:0001934:positive regulation of protein phospho…	GO:0005634:nucleus;GO:0005654:nucleoplasm;GO:0005667:transcription factor complex;GO:0043234:protein complex;GO:0044798:nuclear transcription factor complex;	GO:0000976:transcription regulatory region sequence-specific DNA binding;GO:0000981:sequence-specific DNA binding RNA polymerase II transcription factor activity;GO:0001046:core promoter sequence-specific DNA binding;GO:0001077:RNA polymerase II core promoter proximal region sequence-specific DNA binding transcription factor activity involved in positive regulation of transcription;GO:0001158:enh…	K18435
ENSMUSG00000069601	651.062	1.62413	0.124097	13.0876	3.88e-39	2.73e-37	10	69398773	70027438	+	Ank3	ankyrin 3%2C epithelial [Source:MGI Symbol%3BAcc:MGI:88026]	GO:0000281:mitotic cytokinesis;GO:0007009:plasma membrane organization;GO:0007010:cytoskeleton organization;GO:0007165:signal transduction;GO:0007409:axonogenesis;GO:0007411:axon guidance;GO:0007528:neuromuscular junction development;GO:0010628:positive regulation of gene expression;GO:0010650:positive regulation of cell communication by electrical coupling;GO:0010765:positive regulation of sodiu…	GO:0005764:lysosome;GO:0005886:plasma membrane;GO:0005923:bicellular tight junction;GO:0009925:basal plasma membrane;GO:0009986:cell surface;GO:0014704:intercalated disc;GO:0014731:spectrin-associated cytoskeleton;GO:0016020:membrane;GO:0016323:basolateral plasma membrane;GO:0016328:lateral plasma membrane;GO:0016529:sarcoplasmic reticulum;GO:0030018:Z disc;GO:0030315:T-tubule;GO:0030424:axon;GO:…	GO:0005200:structural constituent of cytoskeleton;GO:0005515:protein binding;GO:0008092:cytoskeletal protein binding;GO:0030507:spectrin binding;GO:0030674:protein binding, bridging;GO:0044325:ion channel binding;GO:0045296:cadherin binding;	K10380
ENSMUSG00000073460	114.992	2.91296	0.22272	13.079	4.34e-39	3.05e-37	17	12888902	12910000	-	Pnldc1	poly(A)-specific ribonuclease (PARN)-like domain containing 1 [Source:MGI Symbol%3BAcc:MGI:2685159]	GO:0000184:nuclear-transcribed mRNA catabolic process, nonsense-mediated decay;GO:0000289:nuclear-transcribed mRNA poly(A) tail shortening;GO:0090503:RNA phosphodiester bond hydrolysis, exonucleolytic;	GO:0005783:endoplasmic reticulum;GO:0005789:endoplasmic reticulum membrane;GO:0016021:integral component of membrane;	GO:0003723:RNA binding;GO:0004535:poly(A)-specific ribonuclease activity;GO:0046872:metal ion binding;	K01148
ENSMUSG00000027894	104.333	-4.31474	0.330065	-13.0724	4.74e-39	3.31e-37	3	107467543	107518018	-	Slc6a17	solute carrier family 6 (neurotransmitter transporter)%2C member 17 [Source:MGI Symbol%3BAcc:MGI:2442535]	GO:0003333:amino acid transmembrane transport;GO:0006836:neurotransmitter transport;GO:0007420:brain development;GO:0015804:neutral amino acid transport;GO:0015816:glycine transport;GO:0015820:leucine transport;GO:0015824:proline transport;GO:0032328:alanine transport;	GO:0005887:integral component of plasma membrane;GO:0008021:synaptic vesicle;GO:0030054:cell junction;GO:0030672:synaptic vesicle membrane;	GO:0005328:neurotransmitter:sodium symporter activity;GO:0015171:amino acid transmembrane transporter activity;	K05048
ENSMUSG00000031740	2725.58	-1.67613	0.128343	-13.0598	5.58e-39	3.89e-37	8	92827291	92853420	+	Mmp2	matrix metallopeptidase 2 [Source:MGI Symbol%3BAcc:MGI:97009]	GO:0001525:angiogenesis;GO:0001666:response to hypoxia;GO:0001955:blood vessel maturation;GO:0001957:intramembranous ossification;GO:0006508:proteolysis;GO:0007566:embryo implantation;GO:0030574:collagen catabolic process;GO:0035987:endodermal cell differentiation;GO:0045089:positive regulation of innate immune response;GO:0048705:skeletal system morphogenesis;GO:0060325:face morphogenesis;GO:006…	GO:0005578:proteinaceous extracellular matrix;GO:0005615:extracellular space;GO:0005634:nucleus;GO:0005737:cytoplasm;GO:0005739:mitochondrion;GO:0005886:plasma membrane;GO:0030017:sarcomere;GO:0031012:extracellular matrix;	GO:0004222:metalloendopeptidase activity;GO:0004252:serine-type endopeptidase activity;GO:0008237:metallopeptidase activity;GO:0008270:zinc ion binding;	K01398
ENSMUSG00000029209	141.262	2.85019	0.218284	13.0573	5.78e-39	4.01e-37	5	69573108	69592340	-	Gnpda2	glucosamine-6-phosphate deaminase 2 [Source:MGI Symbol%3BAcc:MGI:1915230]	GO:0005975:carbohydrate metabolic process;GO:0006044:N-acetylglucosamine metabolic process;	GO:0005634:nucleus;GO:0005737:cytoplasm;	GO:0004342:glucosamine-6-phosphate deaminase activity;GO:0016787:hydrolase activity;	K02564
ENSMUSG00000044337	121.588	-2.80715	0.215096	-13.0507	6.3e-39	4.35e-37	1	90203980	90216751	+	Ackr3	atypical chemokine receptor 3 [Source:MGI Symbol%3BAcc:MGI:109562]	GO:0001525:angiogenesis;GO:0001570:vasculogenesis;GO:0006935:chemotaxis;GO:0007155:cell adhesion;GO:0007186:G-protein coupled receptor signaling pathway;GO:0031623:receptor internalization;GO:0070098:chemokine-mediated signaling pathway;GO:0070374:positive regulation of ERK1 and ERK2 cascade;GO:1902230:negative regulation of intrinsic apoptotic signaling pathway in response to DNA damage;	GO:0005634:nucleus;GO:0005768:endosome;GO:0005769:early endosome;GO:0005886:plasma membrane;GO:0005905:coated pit;GO:0009986:cell surface;GO:0016021:integral component of membrane;GO:0043231:intracellular membrane-bounded organelle;GO:0048471:perinuclear region of cytoplasm;GO:0055037:recycling endosome;	GO:0005044:scavenger receptor activity;GO:0015026:coreceptor activity;GO:0016494:C-X-C chemokine receptor activity;GO:0019958:C-X-C chemokine binding;	K04304
ENSMUSG00000024810	304.48	2.62837	0.201716	13.0301	8.25e-39	5.69e-37	19	29925114	29960718	+	Il33	interleukin 33 [Source:MGI Symbol%3BAcc:MGI:1924375]	GO:0002281:macrophage activation involved in immune response;GO:0002282:microglial cell activation involved in immune response;GO:0002686:negative regulation of leukocyte migration;GO:0002826:negative regulation of T-helper 1 type immune response;GO:0002830:positive regulation of type 2 immune response;GO:0006351:transcription, DNA-templated;GO:0010628:positive regulation of gene expression;GO:00…	GO:0005576:extracellular region;GO:0005615:extracellular space;GO:0005634:nucleus;GO:0005654:nucleoplasm;GO:0005694:chromosome;GO:0005829:cytosol;GO:0030133:transport vesicle;	GO:0005125:cytokine activity;	K12967
ENSMUSG00000034121	132.824	2.81554	0.216526	13.0033	1.17e-38	8.05e-37	11	87853215	87863803	+	Mks1	Meckel syndrome%2C type 1 [Source:MGI Symbol%3BAcc:MGI:3584243]	GO:0001843:neural tube closure;GO:0007368:determination of left/right symmetry;GO:0008589:regulation of smoothened signaling pathway;GO:0010669:epithelial structure maintenance;GO:0042733:embryonic digit morphogenesis;GO:0044458:motile cilium assembly;GO:0048706:embryonic skeletal system development;GO:0048754:branching morphogenesis of an epithelial tube;GO:0060122:inner ear receptor stereociliu…	GO:0005737:cytoplasm;GO:0005813:centrosome;GO:0005814:centriole;GO:0016020:membrane;GO:0035869:ciliary transition zone;GO:0036038:TCTN-B9D complex;GO:0036064:ciliary basal body;	GO:0005515:protein binding;	K19332
ENSMUSG00000039943	262.058	2.40528	0.185072	12.9964	1.28e-38	8.77e-37	2	135659011	136014593	+	Plcb4	phospholipase C%2C beta 4 [Source:MGI Symbol%3BAcc:MGI:107464]	GO:0016042:lipid catabolic process;GO:0035556:intracellular signal transduction;	GO:0005634:nucleus;GO:0005790:smooth endoplasmic reticulum;GO:0014069:postsynaptic density;GO:0030425:dendrite;	GO:0004435:phosphatidylinositol phospholipase C activity;GO:0004871:signal transducer activity;GO:0005509:calcium ion binding;GO:0005515:protein binding;	K05858
ENSMUSG00000042770	281.381	3.00392	0.231183	12.9937	1.33e-38	9.06e-37	6	135137522	135198022	-	Hebp1	heme binding protein 1 [Source:MGI Symbol%3BAcc:MGI:1333880]	GO:0042168:heme metabolic process;	GO:0005737:cytoplasm;GO:0005739:mitochondrion;GO:0005829:cytosol;GO:0070062:extracellular exosome;	GO:0020037:heme binding;	-
ENSMUSG00000019779	317.047	2.22247	0.17114	12.9863	1.46e-38	9.94e-37	10	34483399	34611278	+	Frk	fyn-related kinase [Source:MGI Symbol%3BAcc:MGI:103265]	GO:0000122:negative regulation of transcription from RNA polymerase II promoter;GO:0007169:transmembrane receptor protein tyrosine kinase signaling pathway;GO:0016477:cell migration;GO:0030154:cell differentiation;GO:0038083:peptidyl-tyrosine autophosphorylation;GO:0042127:regulation of cell proliferation;GO:0045087:innate immune response;	GO:0005654:nucleoplasm;GO:0005829:cytosol;GO:0031234:extrinsic component of cytoplasmic side of plasma membrane;GO:0070062:extracellular exosome;	GO:0004715:non-membrane spanning protein tyrosine kinase activity;GO:0005102:receptor binding;GO:0005524:ATP binding;	K08892
ENSMUSG00000034295	87.2838	4.19602	0.324055	12.9485	2.4e-38	1.62e-36	18	24709445	25133500	+	Fhod3	formin homology 2 domain containing 3 [Source:MGI Symbol%3BAcc:MGI:1925847]	GO:0030837:negative regulation of actin filament polymerization;GO:0045214:sarcomere organization;GO:0051639:actin filament network formation;GO:0055003:cardiac myofibril assembly;	GO:0005865:striated muscle thin filament;GO:0030017:sarcomere;GO:0030018:Z disc;	GO:0003674:molecular_function;GO:0003779:actin binding;	-
ENSMUSG00000049971	88.3434	5.96394	0.461338	12.9275	3.15e-38	2.12e-36	5	127632262	127709374	+	Glt1d1	glycosyltransferase 1 domain containing 1 [Source:MGI Symbol%3BAcc:MGI:2442755]	GO:0008150:biological_process;	GO:0005576:extracellular region;GO:0005829:cytosol;	GO:0003674:molecular_function;GO:0016757:transferase activity, transferring glycosyl groups;	-
ENSMUSG00000001656	75.3659	-5.90529	0.457229	-12.9154	3.69e-38	2.48e-36	15	102954427	102957708	+	Hoxc11	homeobox C11 [Source:MGI Symbol%3BAcc:MGI:96193]	GO:0001501:skeletal system development;GO:0001656:metanephros development;GO:0001759:organ induction;GO:0006366:transcription from RNA polymerase II promoter;GO:0009952:anterior/posterior pattern specification;GO:0009954:proximal/distal pattern formation;GO:0042733:embryonic digit morphogenesis;GO:0045944:positive regulation of transcription from RNA polymerase II promoter;GO:0060272:embryonic sk…	GO:0005654:nucleoplasm;GO:0005829:cytosol;	GO:0000978:RNA polymerase II core promoter proximal region sequence-specific DNA binding;GO:0001077:RNA polymerase II core promoter proximal region sequence-specific DNA binding transcription factor activity involved in positive regulation of transcription;	K09296
ENSMUSG00000021390	831.672	1.56626	0.12133	12.9091	4e-38	2.68e-36	13	49608046	49624501	+	Ogn	osteoglycin [Source:MGI Symbol%3BAcc:MGI:109278]	GO:0007409:axonogenesis;	GO:0005578:proteinaceous extracellular matrix;GO:0005615:extracellular space;GO:0031012:extracellular matrix;GO:0070062:extracellular exosome;GO:1903561:extracellular vesicle;	GO:0008083:growth factor activity;	K08126
ENSMUSG00000041624	81.5113	5.48494	0.425268	12.8976	4.64e-38	3.1e-36	9	3532778	3894736	+	Gucy1a2	guanylate cyclase 1%2C soluble%2C alpha 2 [Source:MGI Symbol%3BAcc:MGI:2660877]	GO:0006182:cGMP biosynthetic process;GO:0007165:signal transduction;GO:0030828:positive regulation of cGMP biosynthetic process;GO:0035556:intracellular signal transduction;	GO:0005886:plasma membrane;GO:0008074:guanylate cyclase complex, soluble;	GO:0000166:nucleotide binding;GO:0004016:adenylate cyclase activity;GO:0004383:guanylate cyclase activity;GO:0020037:heme binding;	K12318
ENSMUSG00000036779	2296.47	-1.16196	0.0902072	-12.881	5.76e-38	3.83e-36	8	88199213	88259722	+	Papd5	PAP associated domain containing 5 [Source:MGI Symbol%3BAcc:MGI:1917820]	GO:0006364:rRNA processing;GO:0006397:mRNA processing;GO:0007049:cell cycle;GO:0032211:negative regulation of telomere maintenance via telomerase;GO:0043630:ncRNA polyadenylation involved in polyadenylation-dependent ncRNA catabolic process;GO:0051301:cell division;GO:0071044:histone mRNA catabolic process;GO:0071897:DNA biosynthetic process;	GO:0005575:cellular_component;GO:0005730:nucleolus;GO:0005737:cytoplasm;	GO:0003677:DNA binding;GO:0003723:RNA binding;GO:0003887:DNA-directed DNA polymerase activity;GO:0004652:polynucleotide adenylyltransferase activity;GO:0046872:metal ion binding;	K03514
ENSMUSG00000022464	1621.44	1.59566	0.124161	12.8515	8.44e-38	5.59e-36	15	96994823	97055956	-	Slc38a4	solute carrier family 38%2C member 4 [Source:MGI Symbol%3BAcc:MGI:1916604]	GO:0003333:amino acid transmembrane transport;GO:0006814:sodium ion transport;	GO:0005887:integral component of plasma membrane;	GO:0015171:amino acid transmembrane transporter activity;GO:0015293:symporter activity;	K14991
ENSMUSG00000067212	280.971	-2.65824	0.207287	-12.824	1.2e-37	7.95e-36	17	36029773	36032855	-	H2-T23	histocompatibility 2%2C T region locus 23 [Source:MGI Symbol%3BAcc:MGI:95957]	GO:0001916:positive regulation of T cell mediated cytotoxicity;GO:0002250:adaptive immune response;GO:0002474:antigen processing and presentation of peptide antigen via MHC class I;GO:0002476:antigen processing and presentation of endogenous peptide antigen via MHC class Ib;GO:0002489:antigen processing and presentation of endogenous peptide antigen via MHC class Ib via ER pathway, TAP-dependent;…	GO:0005886:plasma membrane;GO:0009986:cell surface;GO:0030670:phagocytic vesicle membrane;GO:0032398:MHC class Ib protein complex;GO:0042612:MHC class I protein complex;GO:0070062:extracellular exosome;GO:0071556:integral component of lumenal side of endoplasmic reticulum membrane;	GO:0005102:receptor binding;GO:0030881:beta-2-microglobulin binding;GO:0042288:MHC class I protein binding;GO:0042605:peptide antigen binding;GO:0042608:T cell receptor binding;GO:0046703:natural killer cell lectin-like receptor binding;	K06751
ENSMUSG00000060301	537.554	1.47174	0.114825	12.8172	1.31e-37	8.64e-36	10	79064374	79097600	-	2610008E11Rik	RIKEN cDNA 2610008E11 gene [Source:MGI Symbol%3BAcc:MGI:1919378]	GO:0006355:regulation of transcription, DNA-templated;GO:0008150:biological_process;	GO:0005575:cellular_component;GO:0005622:intracellular;	GO:0003674:molecular_function;GO:0003676:nucleic acid binding;GO:0046872:metal ion binding;	K09228
ENSMUSG00000039043	348.749	1.70884	0.133343	12.8154	1.34e-37	8.82e-36	7	79925361	79935359	-	Arpin	actin-related protein 2/3 complex inhibitor [Source:MGI Symbol%3BAcc:MGI:1917670]	GO:0008150:biological_process;GO:0030336:negative regulation of cell migration;GO:0033058:directional locomotion;GO:0051126:negative regulation of actin nucleation;GO:2000393:negative regulation of lamellipodium morphogenesis;	GO:0030027:lamellipodium;	GO:0003674:molecular_function;	-
ENSMUSG00000031673	2431.39	-1.39859	0.109139	-12.8147	1.36e-37	8.87e-36	8	102632095	102785642	-	Cdh11	cadherin 11 [Source:MGI Symbol%3BAcc:MGI:99217]	GO:0007156:homophilic cell adhesion via plasma membrane adhesion molecules;GO:0021957:corticospinal tract morphogenesis;	GO:0005737:cytoplasm;GO:0005886:plasma membrane;GO:0016021:integral component of membrane;GO:0070062:extracellular exosome;	GO:0005509:calcium ion binding;	K06803
ENSMUSG00000075394	423.859	1.89095	0.147947	12.7813	2.09e-37	1.36e-35	15	103018934	103036852	+	Hoxc4	homeobox C4 [Source:MGI Symbol%3BAcc:MGI:96195]	GO:0001501:skeletal system development;GO:0006366:transcription from RNA polymerase II promoter;GO:0009952:anterior/posterior pattern specification;GO:0045944:positive regulation of transcription from RNA polymerase II promoter;GO:0048562:embryonic organ morphogenesis;GO:0051216:cartilage development;	GO:0005634:nucleus;GO:0005654:nucleoplasm;	GO:0000980:RNA polymerase II distal enhancer sequence-specific DNA binding;GO:0001205:RNA polymerase II distal enhancer sequence-specific DNA binding transcription factor activity involved in positive regulation of transcription;GO:0071837:HMG box domain binding;	K09304
ENSMUSG00000040596	118.099	3.39033	0.265279	12.7802	2.11e-37	1.37e-35	1	166384622	166409863	-	Pogk	pogo transposable element with KRAB domain [Source:MGI Symbol%3BAcc:MGI:1918842]	GO:0006355:regulation of transcription, DNA-templated;GO:0007275:multicellular organismal development;GO:0008150:biological_process;	GO:0005575:cellular_component;GO:0005634:nucleus;	GO:0003677:DNA binding;	-
ENSMUSG00000068874	73.0873	5.3903	0.422786	12.7495	3.14e-37	2.03e-35	3	94933056	94944758	+	Selenbp1	selenium binding protein 1 [Source:MGI Symbol%3BAcc:MGI:96825]	GO:0015031:protein transport;GO:0050873:brown fat cell differentiation;	GO:0001650:fibrillar center;GO:0005615:extracellular space;GO:0005730:nucleolus;GO:0005829:cytosol;GO:0016020:membrane;GO:0070062:extracellular exosome;	GO:0008430:selenium binding;	-
ENSMUSG00000029186	1194.96	-1.19446	0.0937089	-12.7465	3.26e-37	2.1e-35	5	52741574	52769340	+	Pi4k2b	phosphatidylinositol 4-kinase type 2 beta [Source:MGI Symbol%3BAcc:MGI:1914323]	GO:0007030:Golgi organization;GO:0007032:endosome organization;GO:0046854:phosphatidylinositol phosphorylation;	GO:0005765:lysosomal membrane;GO:0005768:endosome;GO:0005802:trans-Golgi network;GO:0005886:plasma membrane;GO:0016020:membrane;	GO:0004430:1-phosphatidylinositol 4-kinase activity;GO:0005524:ATP binding;	-
ENSMUSG00000026879	2886.13	1.21956	0.0957571	12.7359	3.73e-37	2.4e-35	2	35256380	35307892	+	Gsn	gelsolin [Source:MGI Symbol%3BAcc:MGI:95851]	GO:0006911:phagocytosis, engulfment;GO:0007568:aging;GO:0010628:positive regulation of gene expression;GO:0014003:oligodendrocyte development;GO:0014891:striated muscle atrophy;GO:0016192:vesicle-mediated transport;GO:0030041:actin filament polymerization;GO:0031648:protein destabilization;GO:0042246:tissue regeneration;GO:0042989:sequestering of actin monomers;GO:0045010:actin nucleation;GO:0045…	GO:0001726:ruffle;GO:0002102:podosome;GO:0005576:extracellular region;GO:0005615:extracellular space;GO:0005634:nucleus;GO:0005737:cytoplasm;GO:0005829:cytosol;GO:0005886:plasma membrane;GO:0005925:focal adhesion;GO:0016528:sarcoplasm;GO:0030027:lamellipodium;GO:0030478:actin cap;GO:0030864:cortical actin cytoskeleton;GO:0043209:myelin sheath;GO:0048471:perinuclear region of cytoplasm;GO:0070062:…	GO:0003779:actin binding;GO:0005509:calcium ion binding;GO:0005515:protein binding;GO:0019904:protein domain specific binding;GO:0045159:myosin II binding;GO:0051015:actin filament binding;	K05768
ENSMUSG00000027122	1770.91	-1.11682	0.0879835	-12.6935	6.43e-37	4.12e-35	2	106962527	106974424	-	Arl14ep	ADP-ribosylation factor-like 14 effector protein [Source:MGI Symbol%3BAcc:MGI:1926020]	GO:0008150:biological_process;	GO:0005634:nucleus;GO:0005730:nucleolus;GO:0005829:cytosol;GO:0005886:plasma membrane;GO:0005925:focal adhesion;GO:0043231:intracellular membrane-bounded organelle;	GO:0003674:molecular_function;	-
ENSMUSG00000018326	5498.7	-0.95484	0.0753325	-12.675	8.13e-37	5.2e-35	2	163994960	164018588	+	Ywhab	tyrosine 3-monooxygenase/tryptophan 5-monooxygenase activation protein%2C beta polypeptide [Source:MGI Symbol%3BAcc:MGI:1891917]	GO:0006605:protein targeting;GO:0035308:negative regulation of protein dephosphorylation;GO:0043085:positive regulation of catalytic activity;GO:0045744:negative regulation of G-protein coupled receptor protein signaling pathway;GO:0045892:negative regulation of transcription, DNA-templated;GO:0051220:cytoplasmic sequestering of protein;GO:0051291:protein heterooligomerization;	GO:0005634:nucleus;GO:0005737:cytoplasm;GO:0005829:cytosol;GO:0005925:focal adhesion;GO:0016020:membrane;GO:0017053:transcriptional repressor complex;GO:0030659:cytoplasmic vesicle membrane;GO:0042470:melanosome;GO:0043234:protein complex;GO:0048471:perinuclear region of cytoplasm;GO:0070062:extracellular exosome;	GO:0003714:transcription corepressor activity;GO:0005515:protein binding;GO:0008022:protein C-terminus binding;GO:0019899:enzyme binding;GO:0019904:protein domain specific binding;GO:0032403:protein complex binding;GO:0042826:histone deacetylase binding;GO:0045296:cadherin binding;GO:0050815:phosphoserine binding;GO:0051219:phosphoprotein binding;	K16197
ENSMUSG00000031373	127.825	2.63964	0.208991	12.6304	1.44e-36	9.14e-35	X	163976822	164027997	-	Car5b	carbonic anhydrase 5b%2C mitochondrial [Source:MGI Symbol%3BAcc:MGI:1926249]	-	-	-	K01672
ENSMUSG00000035131	67.607	-5.77456	0.460523	-12.5391	4.56e-36	2.89e-34	1	146494760	146902472	+	Brinp3	bone morphogenetic protein/retinoic acid inducible neural specific 3 [Source:MGI Symbol%3BAcc:MGI:2443035]	GO:0007050:cell cycle arrest;GO:0045666:positive regulation of neuron differentiation;GO:0045930:negative regulation of mitotic cell cycle;GO:0071300:cellular response to retinoic acid;	GO:0005576:extracellular region;GO:0005739:mitochondrion;GO:0005783:endoplasmic reticulum;GO:0030425:dendrite;GO:0043025:neuronal cell body;	GO:0003674:molecular_function;	-
ENSMUSG00000099759	74.482	-5.80889	0.463626	-12.5293	5.16e-36	3.27e-34	12	20804381	20815779	-	1700030C10Rik	RIKEN cDNA 1700030C10 gene [Source:MGI Symbol%3BAcc:MGI:1916763]	-	-	-	-
ENSMUSG00000022575	97.9306	-3.8509	0.307657	-12.5169	6.04e-36	3.8e-34	15	75862339	75867404	+	Gsdmd	gasdermin D [Source:MGI Symbol%3BAcc:MGI:1916396]	-	-	-	K20917
ENSMUSG00000031434	493.471	1.67021	0.133507	12.5103	6.56e-36	4.12e-34	X	139821632	139871677	-	Morc4	microrchidia 4 [Source:MGI Symbol%3BAcc:MGI:1922996]	GO:0008150:biological_process;	GO:0005654:nucleoplasm;	GO:0003674:molecular_function;GO:0008270:zinc ion binding;	-
ENSMUSG00000032359	94.9961	3.13683	0.250804	12.5071	6.83e-36	4.28e-34	9	90054152	90076089	+	Ctsh	cathepsin H [Source:MGI Symbol%3BAcc:MGI:107285]	GO:0001656:metanephros development;GO:0001913:T cell mediated cytotoxicity;GO:0002764:immune response-regulating signaling pathway;GO:0006508:proteolysis;GO:0006915:apoptotic process;GO:0006919:activation of cysteine-type endopeptidase activity involved in apoptotic process;GO:0008284:positive regulation of cell proliferation;GO:0010628:positive regulation of gene expression;GO:0010634:positive r…	GO:0000932:cytoplasmic mRNA processing body;GO:0005615:extracellular space;GO:0005764:lysosome;GO:0005829:cytosol;GO:0043231:intracellular membrane-bounded organelle;GO:0070062:extracellular exosome;GO:0097208:alveolar lamellar body;	GO:0004175:endopeptidase activity;GO:0004177:aminopeptidase activity;GO:0004197:cysteine-type endopeptidase activity;GO:0004252:serine-type endopeptidase activity;GO:0008233:peptidase activity;GO:0008234:cysteine-type peptidase activity;GO:0008656:cysteine-type endopeptidase activator activity involved in apoptotic process;GO:0016505:peptidase activator activity involved in apoptotic process;GO:0…	K01275
ENSMUSG00000031827	185.84	2.41915	0.193489	12.5027	7.21e-36	4.5e-34	8	119809222	119840544	-	Cotl1	coactosin-like 1 (Dictyostelium) [Source:MGI Symbol%3BAcc:MGI:1919292]	GO:0050832:defense response to fungus;	GO:0005575:cellular_component;GO:0005634:nucleus;GO:0005737:cytoplasm;GO:0005856:cytoskeleton;GO:0070062:extracellular exosome;	GO:0003779:actin binding;GO:0005515:protein binding;GO:0019899:enzyme binding;	-
ENSMUSG00000069743	138.692	2.62328	0.210034	12.4898	8.49e-36	5.28e-34	17	21816876	21845759	-	Zfp820	zinc finger protein 820 [Source:MGI Symbol%3BAcc:MGI:1922674]	GO:0006355:regulation of transcription, DNA-templated;GO:0008150:biological_process;	GO:0005575:cellular_component;GO:0005622:intracellular;	GO:0003674:molecular_function;GO:0003676:nucleic acid binding;GO:0046872:metal ion binding;	-
ENSMUSG00000038697	1388.37	-1.33666	0.107038	-12.4877	8.72e-36	5.41e-34	8	123996318	124021397	-	Taf5l	TATA-box binding protein associated factor 5 like [Source:MGI Symbol%3BAcc:MGI:1919039]	GO:0006351:transcription, DNA-templated;GO:0006355:regulation of transcription, DNA-templated;GO:0043966:histone H3 acetylation;	GO:0000932:cytoplasmic mRNA processing body;GO:0005634:nucleus;GO:0016607:nuclear speck;GO:0030914:STAGA complex;GO:0033276:transcription factor TFTC complex;	GO:0003713:transcription coactivator activity;GO:0004402:histone acetyltransferase activity;	K03130
ENSMUSG00000041347	70.1459	-4.98342	0.399112	-12.4863	8.87e-36	5.49e-34	12	105603085	105605428	+	Bdkrb1	bradykinin receptor%2C beta 1 [Source:MGI Symbol%3BAcc:MGI:88144]	GO:0001933:negative regulation of protein phosphorylation;GO:0002687:positive regulation of leukocyte migration;GO:0006954:inflammatory response;GO:0007205:protein kinase C-activating G-protein coupled receptor signaling pathway;GO:0009612:response to mechanical stimulus;GO:0016477:cell migration;GO:0019233:sensory perception of pain;GO:0030308:negative regulation of cell growth;GO:0032496:respon…	GO:0005886:plasma membrane;GO:0016021:integral component of membrane;GO:0043005:neuron projection;	GO:0004947:bradykinin receptor activity;GO:0042277:peptide binding;	K03915
ENSMUSG00000037868	2205.49	1.13195	0.0907418	12.4744	1.03e-35	6.34e-34	10	67535475	67542188	+	Egr2	early growth response 2 [Source:MGI Symbol%3BAcc:MGI:95296]	GO:0006355:regulation of transcription, DNA-templated;GO:0006366:transcription from RNA polymerase II promoter;GO:0006611:protein export from nucleus;GO:0007611:learning or memory;GO:0007622:rhythmic behavior;GO:0008045:motor neuron axon guidance;GO:0014037:Schwann cell differentiation;GO:0016925:protein sumoylation;GO:0021569:rhombomere 3 development;GO:0021612:facial nerve structural organizati…	GO:0005634:nucleus;GO:0005654:nucleoplasm;GO:0005737:cytoplasm;GO:0043231:intracellular membrane-bounded organelle;	GO:0000978:RNA polymerase II core promoter proximal region sequence-specific DNA binding;GO:0001077:RNA polymerase II core promoter proximal region sequence-specific DNA binding transcription factor activity involved in positive regulation of transcription;GO:0001102:RNA polymerase II activating transcription factor binding;GO:0003677:DNA binding;GO:0003682:chromatin binding;GO:0003700:sequence-s…	K12496
ENSMUSG00000087365	231.135	2.14562	0.172118	12.466	1.14e-35	7.03e-34	X	53055046	53057190	-	C430049B03Rik	RIKEN cDNA C430049B03 gene [Source:MGI Symbol%3BAcc:MGI:1924903]	-	-	-	-
ENSMUSG00000032702	408.189	2.07678	0.166747	12.4547	1.32e-35	8.08e-34	19	25236975	25434496	+	Kank1	KN motif and ankyrin repeat domains 1 [Source:MGI Symbol%3BAcc:MGI:2147707]	GO:0010977:negative regulation of neuron projection development;GO:0030177:positive regulation of Wnt signaling pathway;GO:0030336:negative regulation of cell migration;GO:0030837:negative regulation of actin filament polymerization;GO:0035024:negative regulation of Rho protein signal transduction;GO:0035413:positive regulation of catenin import into nucleus;GO:0046627:negative regulation of insu…	GO:0005634:nucleus;GO:0005737:cytoplasm;GO:0005886:plasma membrane;GO:0032587:ruffle membrane;	GO:0008013:beta-catenin binding;	-
ENSMUSG00000007655	2528.31	1.12091	0.0901226	12.4376	1.63e-35	9.97e-34	6	17306335	17341452	+	Cav1	caveolin 1%2C caveolae protein [Source:MGI Symbol%3BAcc:MGI:102709]	GO:0000122:negative regulation of transcription from RNA polymerase II promoter;GO:0000165:MAPK cascade;GO:0000188:inactivation of MAPK activity;GO:0001525:angiogenesis;GO:0001570:vasculogenesis;GO:0001666:response to hypoxia;GO:0001937:negative regulation of endothelial cell proliferation;GO:0001960:negative regulation of cytokine-mediated signaling pathway;GO:0002026:regulation of the force of …	GO:0000139:Golgi membrane;GO:0002080:acrosomal membrane;GO:0005622:intracellular;GO:0005768:endosome;GO:0005783:endoplasmic reticulum;GO:0005794:Golgi apparatus;GO:0005886:plasma membrane;GO:0005887:integral component of plasma membrane;GO:0005901:caveola;GO:0005925:focal adhesion;GO:0005929:cilium;GO:0005938:cell cortex;GO:0016020:membrane;GO:0016021:integral component of membrane;GO:0016323:bas…	GO:0005102:receptor binding;GO:0005198:structural molecule activity;GO:0005515:protein binding;GO:0016504:peptidase activator activity;GO:0019899:enzyme binding;GO:0019901:protein kinase binding;GO:0030674:protein binding, bridging;GO:0032947:protein complex scaffold;GO:0042802:identical protein binding;GO:0044325:ion channel binding;GO:0046982:protein heterodimerization activity;GO:0048365:Rac G…	K06278
ENSMUSG00000029153	128.349	2.86061	0.230123	12.4308	1.78e-35	1.08e-33	5	73322199	73341028	-	Ociad2	OCIA domain containing 2 [Source:MGI Symbol%3BAcc:MGI:1916377]	GO:0008150:biological_process;	GO:0005739:mitochondrion;GO:0005743:mitochondrial inner membrane;GO:0005768:endosome;	GO:0003674:molecular_function;	-
ENSMUSG00000024238	1498.19	2.17636	0.175185	12.4232	1.96e-35	1.19e-33	18	5591860	5775467	+	Zeb1	zinc finger E-box binding homeobox 1 [Source:MGI Symbol%3BAcc:MGI:1344313]	GO:0000122:negative regulation of transcription from RNA polymerase II promoter;GO:0006351:transcription, DNA-templated;GO:0007389:pattern specification process;GO:0007417:central nervous system development;GO:0008285:negative regulation of cell proliferation;GO:0010464:regulation of mesenchymal cell proliferation;GO:0017015:regulation of transforming growth factor beta receptor signaling pathway…	GO:0005634:nucleus;GO:0005654:nucleoplasm;GO:0005667:transcription factor complex;GO:0005829:cytosol;	GO:0001227:RNA polymerase II transcription regulatory region sequence-specific DNA binding transcription factor activity involved in negative regulation of transcription;GO:0003682:chromatin binding;GO:0003700:sequence-specific DNA binding transcription factor activity;GO:0005515:protein binding;GO:0008134:transcription factor binding;GO:0046872:metal ion binding;GO:0070888:E-box binding;	K09299
ENSMUSG00000052726	65.5853	5.726	0.461388	12.4104	2.3e-35	1.39e-33	1	140246158	140612067	+	Kcnt2	potassium channel%2C subfamily T%2C member 2 [Source:MGI Symbol%3BAcc:MGI:3036273]	GO:0006813:potassium ion transport;GO:0071805:potassium ion transmembrane transport;	GO:0005886:plasma membrane;GO:0008076:voltage-gated potassium channel complex;	GO:0005249:voltage-gated potassium channel activity;GO:0005267:potassium channel activity;GO:0015269:calcium-activated potassium channel activity;	K04947
ENSMUSG00000031715	8677.81	-0.954602	0.0769322	-12.4084	2.35e-35	1.42e-33	8	80698507	80739497	-	Smarca5	SWI/SNF related%2C matrix associated%2C actin dependent regulator of chromatin%2C subfamily a%2C member 5 [Source:MGI Symbol%3BAcc:MGI:1935129]	GO:0000183:chromatin silencing at rDNA;GO:0006302:double-strand break repair;GO:0006333:chromatin assembly or disassembly;GO:0006334:nucleosome assembly;GO:0006338:chromatin remodeling;GO:0006352:DNA-templated transcription, initiation;GO:0016569:covalent chromatin modification;GO:0016584:nucleosome positioning;GO:0043044:ATP-dependent chromatin remodeling;GO:0045893:positive regulation of transc…	GO:0000793:condensed chromosome;GO:0001650:fibrillar center;GO:0005634:nucleus;GO:0005654:nucleoplasm;GO:0005677:chromatin silencing complex;GO:0016589:NURF complex;GO:0031010:ISWI-type complex;GO:0031213:RSF complex;GO:0043596:nuclear replication fork;	GO:0003677:DNA binding;GO:0004386:helicase activity;GO:0005515:protein binding;GO:0005524:ATP binding;GO:0016887:ATPase activity;GO:0031491:nucleosome binding;GO:0042393:histone binding;	K11654
ENSMUSG00000049521	1101.57	1.33826	0.107955	12.3964	2.73e-35	1.64e-33	15	78842647	78850902	+	Cdc42ep1	CDC42 effector protein (Rho GTPase binding) 1 [Source:MGI Symbol%3BAcc:MGI:1929763]	GO:0007266:Rho protein signal transduction;GO:0008360:regulation of cell shape;GO:0030838:positive regulation of actin filament polymerization;GO:0031274:positive regulation of pseudopodium assembly;GO:0043547:positive regulation of GTPase activity;GO:0098609:cell-cell adhesion;	GO:0005737:cytoplasm;GO:0005856:cytoskeleton;GO:0005886:plasma membrane;GO:0005913:cell-cell adherens junction;GO:0005925:focal adhesion;GO:0012505:endomembrane system;	GO:0005096:GTPase activator activity;GO:0005515:protein binding;GO:0017049:GTP-Rho binding;GO:0098641:cadherin binding involved in cell-cell adhesion;	-
ENSMUSG00000021360	715.91	-1.65807	0.133813	-12.391	2.92e-35	1.75e-33	13	40859768	40960891	+	Gcnt2	glucosaminyl (N-acetyl) transferase 2%2C I-branching enzyme [Source:MGI Symbol%3BAcc:MGI:1100870]	GO:0006486:protein glycosylation;GO:0007179:transforming growth factor beta receptor signaling pathway;GO:0008284:positive regulation of cell proliferation;GO:0010608:posttranscriptional regulation of gene expression;GO:0010718:positive regulation of epithelial to mesenchymal transition;GO:0010812:negative regulation of cell-substrate adhesion;GO:0030335:positive regulation of cell migration;GO:0…	GO:0000139:Golgi membrane;GO:0016021:integral component of membrane;	GO:0008109:N-acetyllactosaminide beta-1,6-N-acetylglucosaminyltransferase activity;GO:0008375:acetylglucosaminyltransferase activity;	K00742
ENSMUSG00000090124	163.703	2.64914	0.214123	12.3721	3.7e-35	2.21e-33	1	88095062	88220002	+	Ugt1a7c	UDP glucuronosyltransferase 1 family%2C polypeptide A7C [Source:MGI Symbol%3BAcc:MGI:3032636]	GO:0052696:flavonoid glucuronidation;GO:0052697:xenobiotic glucuronidation;	GO:0005789:endoplasmic reticulum membrane;GO:0016021:integral component of membrane;GO:0043231:intracellular membrane-bounded organelle;	GO:0015020:glucuronosyltransferase activity;	K00699
ENSMUSG00000033715	152.422	2.48055	0.200768	12.3553	4.56e-35	2.71e-33	13	4049011	4090688	+	Akr1c14	aldo-keto reductase family 1%2C member C14 [Source:MGI Symbol%3BAcc:MGI:2145458]	GO:0021766:hippocampus development;GO:0055114:oxidation-reduction process;	GO:0005575:cellular_component;	GO:0047023:androsterone dehydrogenase activity;	-
ENSMUSG00000098915	75.7241	4.56078	0.369394	12.3466	5.08e-35	3.01e-33	9	72060937	72061549	+	Rpl15-ps2	ribosomal protein L15%2C pseudogene 2 [Source:MGI Symbol%3BAcc:MGI:3648255]	-	-	-	K02877
ENSMUSG00000072620	120.793	-2.58071	0.209556	-12.3151	7.51e-35	4.45e-33	11	83065112	83070678	+	Slfn2	schlafen 2 [Source:MGI Symbol%3BAcc:MGI:1313258]	GO:0008285:negative regulation of cell proliferation;	-	GO:0005524:ATP binding;	-
ENSMUSG00000052331	116.53	2.82138	0.229389	12.2995	9.11e-35	5.37e-33	1	54645340	54926387	-	Ankrd44	ankyrin repeat domain 44 [Source:MGI Symbol%3BAcc:MGI:3045243]	GO:0008150:biological_process;	GO:0005575:cellular_component;	GO:0003674:molecular_function;	K19044;K20032;K15503
ENSMUSG00000021260	281.183	2.44423	0.198771	12.2967	9.43e-35	5.55e-33	12	108306270	108330869	+	Hhipl1	hedgehog interacting protein-like 1 [Source:MGI Symbol%3BAcc:MGI:1919265]	GO:0006898:receptor-mediated endocytosis;GO:0008150:biological_process;	GO:0005576:extracellular region;GO:0016020:membrane;	GO:0003824:catalytic activity;GO:0005044:scavenger receptor activity;	-
ENSMUSG00000027597	4891.92	-2.09925	0.170771	-12.2928	9.9e-35	5.8e-33	2	155059310	155074497	-	Ahcy	S-adenosylhomocysteine hydrolase [Source:MGI Symbol%3BAcc:MGI:87968]	GO:0006730:one-carbon metabolic process;GO:0019510:S-adenosylhomocysteine catabolic process;GO:0033353:S-adenosylmethionine cycle;	GO:0005829:cytosol;GO:0042470:melanosome;GO:0070062:extracellular exosome;	GO:0004013:adenosylhomocysteinase activity;GO:0005507:copper ion binding;GO:0005515:protein binding;GO:0043621:protein self-association;GO:0051287:NAD binding;	-
ENSMUSG00000006273	5079.98	-1.18813	0.0966702	-12.2906	1.02e-34	5.95e-33	8	69088646	69113711	+	Atp6v1b2	ATPase%2C H+ transporting%2C lysosomal V1 subunit B2 [Source:MGI Symbol%3BAcc:MGI:109618]	GO:0015991:ATP hydrolysis coupled proton transport;GO:0046034:ATP metabolic process;	GO:0001726:ruffle;GO:0005737:cytoplasm;GO:0005765:lysosomal membrane;GO:0005829:cytosol;GO:0005886:plasma membrane;GO:0005902:microvillus;GO:0012505:endomembrane system;GO:0016021:integral component of membrane;GO:0033180:proton-transporting V-type ATPase, V1 domain;GO:0042470:melanosome;GO:0043209:myelin sheath;GO:0043231:intracellular membrane-bounded organelle;GO:0070062:extracellular exosome;	GO:0005524:ATP binding;GO:0016820:hydrolase activity, acting on acid anhydrides, catalyzing transmembrane movement of substances;	K02147
ENSMUSG00000022425	1374.3	-1.38465	0.112676	-12.2888	1.04e-34	6.06e-33	15	54838898	54920146	-	Enpp2	ectonucleotide pyrophosphatase/phosphodiesterase 2 [Source:MGI Symbol%3BAcc:MGI:1321390]	GO:0006644:phospholipid metabolic process;GO:0006898:receptor-mediated endocytosis;GO:0006935:chemotaxis;GO:0006955:immune response;GO:0009395:phospholipid catabolic process;GO:0010634:positive regulation of epithelial cell migration;GO:0030334:regulation of cell migration;GO:0034638:phosphatidylcholine catabolic process;GO:0045765:regulation of angiogenesis;GO:0050731:positive regulation of pept…	GO:0005615:extracellular space;GO:0005887:integral component of plasma membrane;	GO:0003676:nucleic acid binding;GO:0004528:phosphodiesterase I activity;GO:0004551:nucleotide diphosphatase activity;GO:0004622:lysophospholipase activity;GO:0005044:scavenger receptor activity;GO:0005509:calcium ion binding;GO:0008270:zinc ion binding;GO:0030247:polysaccharide binding;GO:0047391:alkylglycerophosphoethanolamine phosphodiesterase activity;	K01122
ENSMUSG00000028811	3113.37	-0.951891	0.0774964	-12.283	1.12e-34	6.49e-33	4	129189760	129219607	+	Yars	tyrosyl-tRNA synthetase [Source:MGI Symbol%3BAcc:MGI:2147627]	GO:0006418:tRNA aminoacylation for protein translation;GO:0006437:tyrosyl-tRNA aminoacylation;	GO:0005829:cytosol;GO:0016604:nuclear body;GO:0017101:aminoacyl-tRNA synthetase multienzyme complex;GO:0017102:methionyl glutamyl tRNA synthetase complex;	GO:0000049:tRNA binding;GO:0003723:RNA binding;GO:0004831:tyrosine-tRNA ligase activity;GO:0005524:ATP binding;	K01866;K15437;K06878
ENSMUSG00000084350	64.4553	-4.69067	0.382304	-12.2695	1.32e-34	7.65e-33	4	145825237	145829942	+	Znf41-ps	ZNF41%2C pseudogene [Source:MGI Symbol%3BAcc:MGI:1917255]	-	-	-	K09228
ENSMUSG00000031776	2869.93	-1.19661	0.0975549	-12.266	1.38e-34	7.96e-33	8	94666600	94674425	+	Arl2bp	ADP-ribosylation factor-like 2 binding protein [Source:MGI Symbol%3BAcc:MGI:1349429]	GO:0042531:positive regulation of tyrosine phosphorylation of STAT protein;GO:0050790:regulation of catalytic activity;GO:0051457:maintenance of protein location in nucleus;GO:1903506:regulation of nucleic acid-templated transcription;	GO:0005634:nucleus;GO:0005758:mitochondrial intermembrane space;GO:0005813:centrosome;GO:0005929:cilium;GO:0030496:midbody;	GO:0003713:transcription coactivator activity;GO:0005096:GTPase activator activity;GO:0005515:protein binding;GO:0030695:GTPase regulator activity;	K16742
ENSMUSG00000031696	9876.96	-0.931335	0.0759432	-12.2636	1.42e-34	8.18e-33	8	85260392	85299802	-	Vps35	VPS35 retromer complex component [Source:MGI Symbol%3BAcc:MGI:1890467]	GO:0006624:vacuolar protein processing;GO:0007040:lysosome organization;GO:0010628:positive regulation of gene expression;GO:0010629:negative regulation of gene expression;GO:0010821:regulation of mitochondrion organization;GO:0031647:regulation of protein stability;GO:0031648:protein destabilization;GO:0032268:regulation of cellular protein metabolic process;GO:0032463:negative regulation of pro…	GO:0005737:cytoplasm;GO:0005739:mitochondrion;GO:0005764:lysosome;GO:0005765:lysosomal membrane;GO:0005768:endosome;GO:0005769:early endosome;GO:0005770:late endosome;GO:0005829:cytosol;GO:0010008:endosome membrane;GO:0014069:postsynaptic density;GO:0016021:integral component of membrane;GO:0030904:retromer complex;GO:0030906:retromer complex, inner shell;GO:0043005:neuron projection;GO:0043025:n…	GO:0005515:protein binding;GO:0008565:protein transporter activity;GO:0031748:D1 dopamine receptor binding;	K18468
ENSMUSG00000048583	114.816	-3.44517	0.281426	-12.2418	1.86e-34	1.07e-32	7	142650766	142666816	-	Igf2	insulin-like growth factor 2 [Source:MGI Symbol%3BAcc:MGI:96434]	GO:0001649:osteoblast differentiation;GO:0001934:positive regulation of protein phosphorylation;GO:0006006:glucose metabolic process;GO:0009887:organ morphogenesis;GO:0031017:exocrine pancreas development;GO:0038028:insulin receptor signaling pathway via phosphatidylinositol 3-kinase;GO:0040018:positive regulation of multicellular organism growth;GO:0042104:positive regulation of activated T cell…	GO:0005615:extracellular space;GO:0070062:extracellular exosome;	GO:0005158:insulin receptor binding;GO:0005159:insulin-like growth factor receptor binding;GO:0005179:hormone activity;GO:0005515:protein binding;GO:0008083:growth factor activity;GO:0030546:receptor activator activity;GO:0043539:protein serine/threonine kinase activator activity;	K13769
ENSMUSG00000042659	63.283	5.21583	0.426152	12.2394	1.92e-34	1.1e-32	7	68736995	68749241	-	Arrdc4	arrestin domain containing 4 [Source:MGI Symbol%3BAcc:MGI:1913662]	GO:0051443:positive regulation of ubiquitin-protein transferase activity;	GO:0005768:endosome;GO:0005769:early endosome;GO:0005886:plasma membrane;	GO:0003674:molecular_function;	-
ENSMUSG00000015354	78.6833	3.58276	0.29292	12.2312	2.12e-34	1.21e-32	9	95637601	95698096	+	Pcolce2	procollagen C-endopeptidase enhancer 2 [Source:MGI Symbol%3BAcc:MGI:1923727]	GO:0010952:positive regulation of peptidase activity;	GO:0070062:extracellular exosome;	GO:0005518:collagen binding;GO:0008201:heparin binding;GO:0016504:peptidase activator activity;	-
ENSMUSG00000035067	169.786	2.40167	0.196463	12.2245	2.3e-34	1.31e-32	14	63606503	63820809	+	Xkr6	X-linked Kx blood group related 6 [Source:MGI Symbol%3BAcc:MGI:2447765]	GO:0008150:biological_process;	GO:0016021:integral component of membrane;	GO:0003674:molecular_function;	-
ENSMUSG00000059901	176.511	-2.84623	0.233154	-12.2075	2.84e-34	1.61e-32	10	61197112	61273438	-	Adamts14	a disintegrin-like and metallopeptidase (reprolysin type) with thrombospondin type 1 motif%2C 14 [Source:MGI Symbol%3BAcc:MGI:2179942]	GO:0006508:proteolysis;GO:0030199:collagen fibril organization;	GO:0005576:extracellular region;	GO:0004222:metalloendopeptidase activity;GO:0008233:peptidase activity;GO:0008270:zinc ion binding;	K08628
ENSMUSG00000005360	94.9276	3.13274	0.256763	12.2009	3.07e-34	1.74e-32	15	8634124	8710764	-	Slc1a3	solute carrier family 1 (glial high affinity glutamate transporter)%2C member 3 [Source:MGI Symbol%3BAcc:MGI:99917]	GO:0006536:glutamate metabolic process;GO:0006537:glutamate biosynthetic process;GO:0007605:sensory perception of sound;GO:0009416:response to light stimulus;GO:0009449:gamma-aminobutyric acid biosynthetic process;GO:0009611:response to wounding;GO:0010035:response to inorganic substance;GO:0015813:L-glutamate transport;GO:0021545:cranial nerve development;GO:0031223:auditory behavior;GO:0042493:…	GO:0005886:plasma membrane;GO:0005887:integral component of plasma membrane;GO:0009986:cell surface;GO:0042995:cell projection;GO:0043005:neuron projection;GO:0043025:neuronal cell body;GO:0071944:cell periphery;	GO:0005313:L-glutamate transmembrane transporter activity;GO:0005314:high-affinity glutamate transmembrane transporter activity;GO:0005515:protein binding;GO:0015172:acidic amino acid transmembrane transporter activity;GO:0015501:glutamate:sodium symporter activity;GO:0016595:glutamate binding;GO:0016597:amino acid binding;GO:0046872:metal ion binding;	K11102
ENSMUSG00000038393	609.875	-1.47472	0.121262	-12.1614	4.99e-34	2.81e-32	3	96557957	96561883	+	Txnip	thioredoxin interacting protein [Source:MGI Symbol%3BAcc:MGI:1889549]	GO:0000122:negative regulation of transcription from RNA polymerase II promoter;GO:0006351:transcription, DNA-templated;GO:0006606:protein import into nucleus;GO:0006979:response to oxidative stress;GO:0007049:cell cycle;GO:0009612:response to mechanical stimulus;GO:0009749:response to glucose;GO:0030216:keratinocyte differentiation;GO:0032355:response to estradiol;GO:0032570:response to progeste…	GO:0005634:nucleus;GO:0005737:cytoplasm;GO:0005758:mitochondrial intermembrane space;GO:0005829:cytosol;	GO:0004857:enzyme inhibitor activity;GO:0005515:protein binding;GO:0031625:ubiquitin protein ligase binding;	K20910
ENSMUSG00000041235	105.913	-2.83817	0.233377	-12.1613	5e-34	2.81e-32	4	8690406	8867659	+	Chd7	chromodomain helicase DNA binding protein 7 [Source:MGI Symbol%3BAcc:MGI:2444748]	GO:0001501:skeletal system development;GO:0001568:blood vessel development;GO:0001701:in utero embryonic development;GO:0001974:blood vessel remodeling;GO:0003007:heart morphogenesis;GO:0003222:ventricular trabecula myocardium morphogenesis;GO:0003226:right ventricular compact myocardium morphogenesis;GO:0006338:chromatin remodeling;GO:0006351:transcription, DNA-templated;GO:0006364:rRNA processi…	GO:0005634:nucleus;	GO:0000978:RNA polymerase II core promoter proximal region sequence-specific DNA binding;GO:0004386:helicase activity;GO:0005515:protein binding;GO:0005524:ATP binding;	K14437
ENSMUSG00000049191	102.378	3.6467	0.300081	12.1524	5.57e-34	3.12e-32	X	102066544	102071304	-	Rgag4	retrotransposon gag domain containing 4 [Source:MGI Symbol%3BAcc:MGI:3045324]	-	-	-	-
ENSMUSG00000029521	360.986	1.52093	0.125222	12.1459	6.03e-34	3.37e-32	5	110839979	110874145	+	Chek2	checkpoint kinase 2 [Source:MGI Symbol%3BAcc:MGI:1355321]	GO:0000086:G2/M transition of mitotic cell cycle;GO:0001302:replicative cell aging;GO:0001934:positive regulation of protein phosphorylation;GO:0006302:double-strand break repair;GO:0006351:transcription, DNA-templated;GO:0006355:regulation of transcription, DNA-templated;GO:0006468:protein phosphorylation;GO:0006915:apoptotic process;GO:0006974:cellular response to DNA damage stimulus;GO:0006975…	GO:0000781:chromosome, telomeric region;GO:0005634:nucleus;GO:0005654:nucleoplasm;GO:0005794:Golgi apparatus;GO:0016605:PML body;	GO:0004672:protein kinase activity;GO:0004674:protein serine/threonine kinase activity;GO:0005524:ATP binding;GO:0019901:protein kinase binding;GO:0031625:ubiquitin protein ligase binding;GO:0042802:identical protein binding;GO:0042803:protein homodimerization activity;GO:0046872:metal ion binding;	K06641
ENSMUSG00000070372	2076.47	-1.35617	0.111668	-12.1447	6.12e-34	3.41e-32	3	104822779	104864505	-	Capza1	capping protein (actin filament) muscle Z-line%2C alpha 1 [Source:MGI Symbol%3BAcc:MGI:106227]	GO:0051016:barbed-end actin filament capping;	GO:0005903:brush border;GO:0005911:cell-cell junction;GO:0008290:F-actin capping protein complex;GO:0016020:membrane;GO:0030863:cortical cytoskeleton;GO:0070062:extracellular exosome;GO:0071203:WASH complex;	GO:0005515:protein binding;GO:0045296:cadherin binding;GO:0051015:actin filament binding;	K10364
ENSMUSG00000041957	275.848	1.79121	0.147499	12.1439	6.18e-34	3.44e-32	16	16213318	16272712	+	Pkp2	plakophilin 2 [Source:MGI Symbol%3BAcc:MGI:1914701]	GO:0002159:desmosome assembly;GO:0007507:heart development;GO:0016337:single organismal cell-cell adhesion;GO:0045110:intermediate filament bundle assembly;GO:0048496:maintenance of organ identity;GO:0055010:ventricular cardiac muscle tissue morphogenesis;GO:0086002:cardiac muscle cell action potential involved in contraction;GO:0086005:ventricular cardiac muscle cell action potential;GO:0086019:…	GO:0005654:nucleoplasm;GO:0005882:intermediate filament;GO:0005886:plasma membrane;GO:0005911:cell-cell junction;GO:0005912:adherens junction;GO:0014704:intercalated disc;GO:0030054:cell junction;GO:0030057:desmosome;	GO:0005080:protein kinase C binding;GO:0005515:protein binding;GO:0019215:intermediate filament binding;GO:0032947:protein complex scaffold;GO:0045294:alpha-catenin binding;GO:0045296:cadherin binding;	K12642
ENSMUSG00000039239	337.393	1.75398	0.144481	12.1398	6.5e-34	3.6e-32	1	186622792	186705989	-	Tgfb2	transforming growth factor%2C beta 2 [Source:MGI Symbol%3BAcc:MGI:98726]	GO:0000902:cell morphogenesis;GO:0001501:skeletal system development;GO:0001502:cartilage condensation;GO:0001568:blood vessel development;GO:0001654:eye development;GO:0001666:response to hypoxia;GO:0001822:kidney development;GO:0001837:epithelial to mesenchymal transition;GO:0001843:neural tube closure;GO:0001942:hair follicle development;GO:0001974:blood vessel remodeling;GO:0003007:heart morp…	GO:0005576:extracellular region;GO:0005615:extracellular space;GO:0005768:endosome;GO:0030424:axon;GO:0031012:extracellular matrix;GO:0043025:neuronal cell body;	GO:0001540:beta-amyloid binding;GO:0004702:receptor signaling protein serine/threonine kinase activity;GO:0005102:receptor binding;GO:0005114:type II transforming growth factor beta receptor binding;GO:0005125:cytokine activity;GO:0005160:transforming growth factor beta receptor binding;GO:0005515:protein binding;GO:0008083:growth factor activity;GO:0034714:type III transforming growth factor bet…	K13376
ENSMUSG00000034926	73.2276	-4.08221	0.336841	-12.1191	8.37e-34	4.62e-32	4	106561038	106589113	+	Dhcr24	24-dehydrocholesterol reductase [Source:MGI Symbol%3BAcc:MGI:1922004]	GO:0006695:cholesterol biosynthetic process;GO:0006979:response to oxidative stress;GO:0007265:Ras protein signal transduction;GO:0008104:protein localization;GO:0008203:cholesterol metabolic process;GO:0008285:negative regulation of cell proliferation;GO:0009725:response to hormone;GO:0009888:tissue development;GO:0016125:sterol metabolic process;GO:0030539:male genitalia development;GO:0031639:…	GO:0000139:Golgi membrane;GO:0005634:nucleus;GO:0005783:endoplasmic reticulum;GO:0005789:endoplasmic reticulum membrane;GO:0005829:cytosol;GO:0005856:cytoskeleton;GO:0016020:membrane;GO:0016021:integral component of membrane;	GO:0000246:delta24(24-1) sterol reductase activity;GO:0016614:oxidoreductase activity, acting on CH-OH group of donors;GO:0016628:oxidoreductase activity, acting on the CH-CH group of donors, NAD or NADP as acceptor;GO:0019899:enzyme binding;GO:0042605:peptide antigen binding;GO:0050614:delta24-sterol reductase activity;GO:0050660:flavin adenine dinucleotide binding;	K09828
ENSMUSG00000068267	1528.88	-1.01766	0.0840845	-12.1028	1.02e-33	5.63e-32	2	131175182	131180067	-	Cenpb	centromere protein B [Source:MGI Symbol%3BAcc:MGI:88376]	-	GO:0000775:chromosome, centromeric region;GO:0000780:condensed nuclear chromosome, centromeric region;GO:0005694:chromosome;GO:0016604:nuclear body;GO:0031618:nuclear pericentric heterochromatin;	GO:0003682:chromatin binding;GO:0003696:satellite DNA binding;	K11496
ENSMUSG00000025089	411.335	2.85776	0.236238	12.0969	1.1e-33	6.02e-32	19	58235604	58455909	-	Gfra1	glial cell line derived neurotrophic factor family receptor alpha 1 [Source:MGI Symbol%3BAcc:MGI:1100842]	GO:0007169:transmembrane receptor protein tyrosine kinase signaling pathway;GO:0007399:nervous system development;GO:0009653:anatomical structure morphogenesis;	GO:0005886:plasma membrane;GO:0019898:extrinsic component of membrane;GO:0031225:anchored component of membrane;GO:0070062:extracellular exosome;	GO:0004872:receptor activity;	K19895
ENSMUSG00000033585	60.4495	5.30197	0.438335	12.0957	1.11e-33	6.1e-32	7	62346569	62350262	+	Ndn	necdin [Source:MGI Symbol%3BAcc:MGI:97290]	GO:0001764:neuron migration;GO:0003016:respiratory system process;GO:0006355:regulation of transcription, DNA-templated;GO:0006366:transcription from RNA polymerase II promoter;GO:0007409:axonogenesis;GO:0007413:axonal fasciculation;GO:0007417:central nervous system development;GO:0007585:respiratory gaseous exchange;GO:0008285:negative regulation of cell proliferation;GO:0008347:glial cell migra…	GO:0005634:nucleus;GO:0005654:nucleoplasm;GO:0005737:cytoplasm;GO:0005813:centrosome;GO:0005829:cytosol;GO:0016363:nuclear matrix;GO:0042995:cell projection;	GO:0000978:RNA polymerase II core promoter proximal region sequence-specific DNA binding;GO:0001077:RNA polymerase II core promoter proximal region sequence-specific DNA binding transcription factor activity involved in positive regulation of transcription;GO:0005515:protein binding;GO:0043015:gamma-tubulin binding;	K19482
ENSMUSG00000075590	159.631	2.33211	0.192966	12.0856	1.26e-33	6.88e-32	15	76085595	76090013	-	Nrbp2	nuclear receptor binding protein 2 [Source:MGI Symbol%3BAcc:MGI:2385017]	GO:0006468:protein phosphorylation;GO:0006888:ER to Golgi vesicle-mediated transport;GO:0030182:neuron differentiation;GO:0035556:intracellular signal transduction;GO:0043524:negative regulation of neuron apoptotic process;	GO:0005737:cytoplasm;GO:0005829:cytosol;GO:0012505:endomembrane system;	GO:0003674:molecular_function;GO:0004674:protein serine/threonine kinase activity;GO:0005524:ATP binding;	K08875
ENSMUSG00000022037	131.605	2.69081	0.222754	12.0797	1.35e-33	7.37e-32	14	65968483	65981548	+	Clu	clusterin [Source:MGI Symbol%3BAcc:MGI:88423]	GO:0000902:cell morphogenesis;GO:0001774:microglial cell activation;GO:0009615:response to virus;GO:0017038:protein import;GO:0032286:central nervous system myelin maintenance;GO:0032436:positive regulation of proteasomal ubiquitin-dependent protein catabolic process;GO:0032463:negative regulation of protein homooligomerization;GO:0032464:positive regulation of protein homooligomerization;GO:0032…	GO:0005615:extracellular space;GO:0005634:nucleus;GO:0005737:cytoplasm;GO:0005739:mitochondrion;GO:0005783:endoplasmic reticulum;GO:0005829:cytosol;GO:0009986:cell surface;GO:0031012:extracellular matrix;GO:0031966:mitochondrial membrane;GO:0034366:spherical high-density lipoprotein particle;GO:0042583:chromaffin granule;GO:0043234:protein complex;GO:0048471:perinuclear region of cytoplasm;GO:007…	GO:0001540:beta-amyloid binding;GO:0005515:protein binding;GO:0016887:ATPase activity;GO:0031625:ubiquitin protein ligase binding;GO:0032403:protein complex binding;GO:0050750:low-density lipoprotein particle receptor binding;GO:0051787:misfolded protein binding;	-
ENSMUSG00000022371	108.798	-2.9309	0.242744	-12.074	1.45e-33	7.87e-32	15	55307750	55520803	+	Col14a1	collagen%2C type XIV%2C alpha 1 [Source:MGI Symbol%3BAcc:MGI:1341272]	GO:0003229:ventricular cardiac muscle tissue development;GO:0007155:cell adhesion;GO:0030199:collagen fibril organization;GO:0048873:homeostasis of number of cells within a tissue;GO:0061050:regulation of cell growth involved in cardiac muscle cell development;	GO:0005581:collagen trimer;GO:0005614:interstitial matrix;GO:0005615:extracellular space;GO:0031012:extracellular matrix;GO:0070062:extracellular exosome;	GO:0003723:RNA binding;	K08133
ENSMUSG00000031438	108.543	2.99939	0.248495	12.0703	1.52e-33	8.22e-32	X	139563316	139673145	+	Rnf128	ring finger protein 128 [Source:MGI Symbol%3BAcc:MGI:1914139]	GO:0016567:protein ubiquitination;GO:0031647:regulation of protein stability;GO:0042036:negative regulation of cytokine biosynthetic process;	GO:0005770:late endosome;GO:0005783:endoplasmic reticulum;GO:0005794:Golgi apparatus;GO:0005856:cytoskeleton;GO:0016021:integral component of membrane;GO:0048471:perinuclear region of cytoplasm;	GO:0046872:metal ion binding;GO:0061630:ubiquitin protein ligase activity;	K10629;K15692;K10664
ENSMUSG00000025268	1202.83	1.41137	0.11708	12.0547	1.83e-33	9.9e-32	X	150806370	150814345	-	Maged2	melanoma antigen%2C family D%2C 2 [Source:MGI Symbol%3BAcc:MGI:1933391]	GO:0007565:female pregnancy;GO:0070294:renal sodium ion absorption;	GO:0005634:nucleus;GO:0005730:nucleolus;GO:0005829:cytosol;GO:0016020:membrane;	GO:0003674:molecular_function;	-
ENSMUSG00000031983	4247.88	-0.957612	0.0794491	-12.0531	1.87e-33	1.01e-31	8	124635756	124663369	-	2310022B05Rik	RIKEN cDNA 2310022B05 gene [Source:MGI Symbol%3BAcc:MGI:1916801]	-	-	-	-
ENSMUSG00000037337	109.018	2.60249	0.215948	12.0515	1.9e-33	1.02e-31	7	28982050	29003279	+	Map4k1	mitogen-activated protein kinase kinase kinase kinase 1 [Source:MGI Symbol%3BAcc:MGI:1346882]	GO:0000165:MAPK cascade;GO:0000185:activation of MAPKKK activity;GO:0006468:protein phosphorylation;GO:0007346:regulation of mitotic cell cycle;GO:0008283:cell proliferation;GO:0018105:peptidyl-serine phosphorylation;GO:0031098:stress-activated protein kinase signaling cascade;GO:0035556:intracellular signal transduction;GO:0042981:regulation of apoptotic process;GO:0046777:protein autophosphoryl…	GO:0005737:cytoplasm;GO:0016020:membrane;	GO:0004674:protein serine/threonine kinase activity;GO:0005515:protein binding;GO:0005524:ATP binding;GO:0008349:MAP kinase kinase kinase kinase activity;	K04408
ENSMUSG00000025743	384.154	2.57676	0.214174	12.0312	2.44e-33	1.31e-31	4	130792537	130826319	+	Sdc3	syndecan 3 [Source:MGI Symbol%3BAcc:MGI:1349163]	GO:0006024:glycosaminoglycan biosynthetic process;GO:0016477:cell migration;	GO:0005796:Golgi lumen;GO:0005886:plasma membrane;GO:0009986:cell surface;GO:0016020:membrane;GO:0016021:integral component of membrane;	-	K16337
ENSMUSG00000022261	2580.2	0.954596	0.0795508	11.9998	3.56e-33	1.9e-31	15	32920723	33034730	+	Sdc2	syndecan 2 [Source:MGI Symbol%3BAcc:MGI:1349165]	GO:0006024:glycosaminoglycan biosynthetic process;GO:0016477:cell migration;GO:0048814:regulation of dendrite morphogenesis;	GO:0005796:Golgi lumen;GO:0009986:cell surface;GO:0016021:integral component of membrane;	GO:0005515:protein binding;GO:0030165:PDZ domain binding;	K16336
ENSMUSG00000024349	390.139	1.70163	0.141819	11.9986	3.61e-33	1.93e-31	18	35733678	35740554	-	Tmem173	transmembrane protein 173 [Source:MGI Symbol%3BAcc:MGI:1919762]	GO:0002218:activation of innate immune response;GO:0002230:positive regulation of defense response to virus by host;GO:0006915:apoptotic process;GO:0032092:positive regulation of protein binding;GO:0032481:positive regulation of type I interferon production;GO:0032608:interferon-beta production;GO:0033160:positive regulation of protein import into nucleus, translocation;GO:0035458:cellular respon…	GO:0005654:nucleoplasm;GO:0005737:cytoplasm;GO:0005741:mitochondrial outer membrane;GO:0005777:peroxisome;GO:0005783:endoplasmic reticulum;GO:0005789:endoplasmic reticulum membrane;GO:0005794:Golgi apparatus;GO:0005829:cytosol;GO:0005886:plasma membrane;GO:0016021:integral component of membrane;GO:0048471:perinuclear region of cytoplasm;	GO:0005515:protein binding;GO:0008134:transcription factor binding;GO:0019901:protein kinase binding;GO:0031625:ubiquitin protein ligase binding;GO:0035438:cyclic-di-GMP binding;GO:0042802:identical protein binding;GO:0042803:protein homodimerization activity;GO:0061507:cyclic-GMP-AMP binding;	K12654
ENSMUSG00000033467	256.019	1.98566	0.165766	11.9787	4.59e-33	2.44e-31	5	109554709	109558993	-	Crlf2	cytokine receptor-like factor 2 [Source:MGI Symbol%3BAcc:MGI:1889506]	GO:0002380:immunoglobulin secretion involved in immune response;GO:0006954:inflammatory response;GO:0035745:T-helper 2 cell cytokine production;	GO:0005576:extracellular region;GO:0009897:external side of plasma membrane;GO:0016021:integral component of membrane;	-	K05078
ENSMUSG00000025422	121.132	3.37661	0.28255	11.9505	6.45e-33	3.42e-31	10	127075284	127093169	+	Agap2	ArfGAP with GTPase domain%2C ankyrin repeat and PH domain 2 [Source:MGI Symbol%3BAcc:MGI:3580016]	GO:0014068:positive regulation of phosphatidylinositol 3-kinase signaling;GO:0016197:endosomal transport;GO:0030036:actin cytoskeleton organization;GO:0032147:activation of protein kinase activity;GO:0033601:positive regulation of mammary gland epithelial cell proliferation;GO:0042177:negative regulation of protein catabolic process;GO:0043066:negative regulation of apoptotic process;GO:0043524:n…	GO:0005634:nucleus;GO:0005730:nucleolus;GO:0005737:cytoplasm;GO:0005739:mitochondrion;GO:0005768:endosome;GO:0016020:membrane;GO:0070062:extracellular exosome;	GO:0003924:GTPase activity;GO:0005096:GTPase activator activity;GO:0005515:protein binding;GO:0005524:ATP binding;GO:0005525:GTP binding;GO:0019901:protein kinase binding;GO:0030295:protein kinase activator activity;GO:0035014:phosphatidylinositol 3-kinase regulator activity;GO:0046872:metal ion binding;	K17848
ENSMUSG00000055538	3282.1	1.2596	0.105425	11.9478	6.66e-33	3.52e-31	14	25711642	25769039	-	Zcchc24	zinc finger%2C CCHC domain containing 24 [Source:MGI Symbol%3BAcc:MGI:1919168]	-	GO:0005575:cellular_component;	GO:0003723:RNA binding;GO:0008270:zinc ion binding;	-
ENSMUSG00000024043	1065.1	-1.71394	0.143844	-11.9153	9.85e-33	5.19e-31	17	67842713	68004120	-	Arhgap28	Rho GTPase activating protein 28 [Source:MGI Symbol%3BAcc:MGI:2147003]	GO:0007165:signal transduction;GO:0043547:positive regulation of GTPase activity;GO:0051497:negative regulation of stress fiber assembly;	-	GO:0005096:GTPase activator activity;	K20639
ENSMUSG00000027331	675.474	1.54246	0.129556	11.9058	1.1e-32	5.81e-31	2	118814003	118853957	+	Knstrn	kinetochore-localized astrin/SPAG5 binding [Source:MGI Symbol%3BAcc:MGI:1289298]	GO:0000070:mitotic sister chromatid segregation;GO:0007051:spindle organization;GO:0007059:chromosome segregation;GO:0051301:cell division;GO:0051988:regulation of attachment of spindle microtubules to kinetochore;	GO:0000776:kinetochore;GO:0000777:condensed chromosome kinetochore;GO:0000922:spindle pole;GO:0005634:nucleus;GO:0005829:cytosol;GO:0015630:microtubule cytoskeleton;GO:0035371:microtubule plus-end;GO:0072686:mitotic spindle;	GO:0005515:protein binding;	-
ENSMUSG00000039367	1282.43	1.89333	0.159091	11.9009	1.17e-32	6.14e-31	14	20674321	20694850	+	Sec24c	Sec24 related gene family%2C member C (S. cerevisiae) [Source:MGI Symbol%3BAcc:MGI:1919746]	GO:0001701:in utero embryonic development;GO:0006886:intracellular protein transport;GO:0090110:cargo loading into COPII-coated vesicle;	GO:0000139:Golgi membrane;GO:0005575:cellular_component;GO:0005829:cytosol;GO:0030127:COPII vesicle coat;	GO:0000149:SNARE binding;GO:0003674:molecular_function;GO:0008270:zinc ion binding;	K14007
ENSMUSG00000074457	85.2624	3.81743	0.320969	11.8934	1.28e-32	6.69e-31	3	90537254	90543151	+	S100a16	S100 calcium binding protein A16 [Source:MGI Symbol%3BAcc:MGI:1915110]	GO:0051592:response to calcium ion;	GO:0005615:extracellular space;GO:0005634:nucleus;GO:0005730:nucleolus;GO:0005737:cytoplasm;GO:0005829:cytosol;GO:0005886:plasma membrane;GO:0070062:extracellular exosome;	GO:0003723:RNA binding;GO:0005509:calcium ion binding;GO:0042803:protein homodimerization activity;	-
ENSMUSG00000040003	99.002	2.7683	0.233161	11.8729	1.64e-32	8.54e-31	5	19227036	20704792	+	Magi2	membrane associated guanylate kinase%2C WW and PDZ domain containing 2 [Source:MGI Symbol%3BAcc:MGI:1354953]	GO:0002092:positive regulation of receptor internalization;GO:0007165:signal transduction;GO:0008285:negative regulation of cell proliferation;GO:0010976:positive regulation of neuron projection development;GO:0030336:negative regulation of cell migration;GO:0032516:positive regulation of phosphoprotein phosphatase activity;GO:0032926:negative regulation of activin receptor signaling pathway;GO:0…	GO:0005634:nucleus;GO:0005737:cytoplasm;GO:0005770:late endosome;GO:0005886:plasma membrane;GO:0005923:bicellular tight junction;GO:0014069:postsynaptic density;GO:0030425:dendrite;GO:0036057:slit diaphragm;GO:0043234:protein complex;GO:0045202:synapse;GO:0048471:perinuclear region of cytoplasm;	GO:0004871:signal transducer activity;GO:0005515:protein binding;GO:0019902:phosphatase binding;GO:0030159:receptor signaling complex scaffold activity;GO:0030165:PDZ domain binding;GO:0031697:beta-1 adrenergic receptor binding;GO:0046332:SMAD binding;GO:0070699:type II activin receptor binding;	K05629;K05631
ENSMUSG00000022438	90.8608	3.07989	0.259882	11.8511	2.12e-32	1.1e-30	15	84232043	84315688	+	Parvb	parvin%2C beta [Source:MGI Symbol%3BAcc:MGI:2153063]	GO:0007155:cell adhesion;GO:0030031:cell projection assembly;GO:0030032:lamellipodium assembly;GO:0031532:actin cytoskeleton reorganization;GO:0071963:establishment or maintenance of cell polarity regulating cell shape;	GO:0005856:cytoskeleton;GO:0005886:plasma membrane;GO:0005925:focal adhesion;GO:0030018:Z disc;GO:0030027:lamellipodium;	GO:0003779:actin binding;GO:0005515:protein binding;	K06275
ENSMUSG00000019718	192.542	2.5174	0.212501	11.8465	2.24e-32	1.16e-30	12	72073428	72085439	-	L3hypdh	L-3-hydroxyproline dehydratase (trans-) [Source:MGI Symbol%3BAcc:MGI:1914467]	GO:0008152:metabolic process;	GO:0005575:cellular_component;	GO:0016836:hydro-lyase activity;GO:0018112:proline racemase activity;GO:0050346:trans-L-3-hydroxyproline dehydratase activity;	K18384
ENSMUSG00000047146	127.231	2.9793	0.251822	11.831	2.7e-32	1.4e-30	10	62804570	62908996	-	Tet1	tet methylcytosine dioxygenase 1 [Source:MGI Symbol%3BAcc:MGI:1098693]	GO:0001826:inner cell mass cell differentiation;GO:0006351:transcription, DNA-templated;GO:0006493:protein O-linked glycosylation;GO:0008284:positive regulation of cell proliferation;GO:0016569:covalent chromatin modification;GO:0019827:stem cell maintenance;GO:0031062:positive regulation of histone methylation;GO:0035511:oxidative DNA demethylation;GO:0044030:regulation of DNA methylation;GO:004…	GO:0005634:nucleus;GO:0005654:nucleoplasm;	GO:0003677:DNA binding;GO:0005506:iron ion binding;GO:0005515:protein binding;GO:0008270:zinc ion binding;GO:0070579:methylcytosine dioxygenase activity;	K13097
ENSMUSG00000031545	3622.44	-1.1428	0.0968964	-11.7941	4.19e-32	2.16e-30	8	23171265	23208346	-	Gpat4	glycerol-3-phosphate acyltransferase 4 [Source:MGI Symbol%3BAcc:MGI:2142716]	GO:0002071:glandular epithelial cell maturation;GO:0006631:fatty acid metabolic process;GO:0006637:acyl-CoA metabolic process;GO:0006641:triglyceride metabolic process;GO:0006656:phosphatidylcholine biosynthetic process;GO:0007595:lactation;GO:0008610:lipid biosynthetic process;GO:0016024:CDP-diacylglycerol biosynthetic process;GO:0019432:triglyceride biosynthetic process;GO:0030879:mammary gland…	GO:0005783:endoplasmic reticulum;GO:0016020:membrane;GO:0030176:integral component of endoplasmic reticulum membrane;	GO:0004366:glycerol-3-phosphate O-acyltransferase activity;	K13506
ENSMUSG00000070526	57.1159	5.52368	0.468405	11.7925	4.26e-32	2.19e-30	7	62461871	62464510	-	Peg12	paternally expressed 12 [Source:MGI Symbol%3BAcc:MGI:1351637]	GO:0000578:embryonic axis specification;GO:0016055:Wnt signaling pathway;	-	-	K03069
ENSMUSG00000031904	1528	-1.22066	0.103595	-11.783	4.77e-32	2.45e-30	8	106168857	106198706	+	Slc7a6	solute carrier family 7 (cationic amino acid transporter%2C y+ system)%2C member 6 [Source:MGI Symbol%3BAcc:MGI:2142598]	GO:1902475:L-alpha-amino acid transmembrane transport;	GO:0005886:plasma membrane;GO:0005887:integral component of plasma membrane;GO:0016323:basolateral plasma membrane;GO:0043231:intracellular membrane-bounded organelle;	GO:0015179:L-amino acid transmembrane transporter activity;GO:0015297:antiporter activity;	K13872
ENSMUSG00000042686	55.5521	5.50838	0.467981	11.7705	5.54e-32	2.83e-30	1	16964560	17097889	-	Jph1	junctophilin 1 [Source:MGI Symbol%3BAcc:MGI:1891495]	GO:0007517:muscle organ development;	GO:0005783:endoplasmic reticulum;GO:0005789:endoplasmic reticulum membrane;GO:0005886:plasma membrane;GO:0014701:junctional sarcoplasmic reticulum membrane;GO:0016021:integral component of membrane;GO:0016529:sarcoplasmic reticulum;GO:0030018:Z disc;GO:0030314:junctional membrane complex;	GO:0008307:structural constituent of muscle;	K19530
ENSMUSG00000023927	58.147	5.08303	0.431982	11.7668	5.79e-32	2.95e-30	17	51736187	51833290	-	Satb1	special AT-rich sequence binding protein 1 [Source:MGI Symbol%3BAcc:MGI:105084]	GO:0000122:negative regulation of transcription from RNA polymerase II promoter;GO:0006325:chromatin organization;GO:0006338:chromatin remodeling;GO:0006351:transcription, DNA-templated;GO:0006355:regulation of transcription, DNA-templated;GO:0008544:epidermis development;GO:0016571:histone methylation;GO:0042110:T cell activation;GO:0043367:CD4-positive, alpha-beta T cell differentiation;GO:0043…	GO:0000785:chromatin;GO:0005634:nucleus;GO:0005654:nucleoplasm;GO:0005720:nuclear heterochromatin;GO:0016363:nuclear matrix;GO:0016604:nuclear body;GO:0016605:PML body;	GO:0000977:RNA polymerase II regulatory region sequence-specific DNA binding;GO:0001227:RNA polymerase II transcription regulatory region sequence-specific DNA binding transcription factor activity involved in negative regulation of transcription;GO:0003677:DNA binding;GO:0003682:chromatin binding;GO:0003700:sequence-specific DNA binding transcription factor activity;GO:0043565:sequence-specific …	-
ENSMUSG00000029208	968.299	1.30006	0.110551	11.7598	6.28e-32	3.2e-30	5	69556923	69575973	+	Guf1	GUF1 homolog%2C GTPase [Source:MGI Symbol%3BAcc:MGI:2140726]	GO:0006412:translation;	GO:0005739:mitochondrion;GO:0005743:mitochondrial inner membrane;	GO:0003924:GTPase activity;GO:0005525:GTP binding;	K03596
ENSMUSG00000022415	88.5968	3.11476	0.265189	11.7455	7.45e-32	3.78e-30	15	80091334	80119501	+	Syngr1	synaptogyrin 1 [Source:MGI Symbol%3BAcc:MGI:1328323]	GO:0006605:protein targeting;GO:0048169:regulation of long-term neuronal synaptic plasticity;GO:0048172:regulation of short-term neuronal synaptic plasticity;	GO:0008021:synaptic vesicle;GO:0016021:integral component of membrane;GO:0030054:cell junction;GO:0030672:synaptic vesicle membrane;GO:0031594:neuromuscular junction;GO:0042470:melanosome;GO:0043195:terminal bouton;	-	-
ENSMUSG00000076441	375.156	-1.64915	0.14053	-11.7352	8.41e-32	4.26e-30	2	31470207	31520672	+	Ass1	argininosuccinate synthetase 1 [Source:MGI Symbol%3BAcc:MGI:88090]	GO:0000050:urea cycle;GO:0000052:citrulline metabolic process;GO:0000053:argininosuccinate metabolic process;GO:0006526:arginine biosynthetic process;GO:0006531:aspartate metabolic process;GO:0045429:positive regulation of nitric oxide biosynthetic process;GO:0071499:cellular response to laminar fluid shear stress;GO:1903038:negative regulation of leukocyte cell-cell adhesion;	GO:0005739:mitochondrion;GO:0005829:cytosol;GO:0043209:myelin sheath;GO:0070062:extracellular exosome;	GO:0003723:RNA binding;GO:0004055:argininosuccinate synthase activity;GO:0005524:ATP binding;GO:0016597:amino acid binding;GO:0042802:identical protein binding;	K01940
ENSMUSG00000020044	2481.21	2.46632	0.210208	11.7328	8.66e-32	4.37e-30	10	86300372	86349506	+	Timp3	tissue inhibitor of metalloproteinase 3 [Source:MGI Symbol%3BAcc:MGI:98754]	GO:0051045:negative regulation of membrane protein ectodomain proteolysis;GO:0070373:negative regulation of ERK1 and ERK2 cascade;GO:0071310:cellular response to organic substance;GO:1903984:positive regulation of TRAIL-activated apoptotic signaling pathway;	GO:0005604:basement membrane;GO:0005615:extracellular space;GO:0005634:nucleus;GO:0031012:extracellular matrix;GO:0070062:extracellular exosome;	GO:0002020:protease binding;GO:0008191:metalloendopeptidase inhibitor activity;GO:0008270:zinc ion binding;	-
ENSMUSG00000056481	347.376	2.17448	0.185345	11.7321	8.73e-32	4.39e-30	19	5068078	5070637	+	Cd248	CD248 antigen%2C endosialin [Source:MGI Symbol%3BAcc:MGI:1917695]	GO:0008284:positive regulation of cell proliferation;GO:0016477:cell migration;GO:0048535:lymph node development;GO:0060033:anatomical structure regression;GO:2000353:positive regulation of endothelial cell apoptotic process;	GO:0005737:cytoplasm;GO:0005886:plasma membrane;GO:0016021:integral component of membrane;GO:0070062:extracellular exosome;	GO:0005509:calcium ion binding;GO:0030246:carbohydrate binding;GO:0050840:extracellular matrix binding;	K06706
ENSMUSG00000027834	110.447	-2.8056	0.239204	-11.7289	9.06e-32	4.55e-30	3	75557547	75643495	+	Serpini1	serine (or cysteine) peptidase inhibitor%2C clade I%2C member 1 [Source:MGI Symbol%3BAcc:MGI:1194506]	GO:0010951:negative regulation of endopeptidase activity;GO:0010976:positive regulation of neuron projection development;GO:0030155:regulation of cell adhesion;	GO:0005615:extracellular space;GO:0034774:secretory granule lumen;GO:0043025:neuronal cell body;GO:0043204:perikaryon;GO:0060205:cytoplasmic membrane-bounded vesicle lumen;GO:0070062:extracellular exosome;	GO:0004867:serine-type endopeptidase inhibitor activity;	-
ENSMUSG00000021822	462.222	1.84002	0.156969	11.7222	9.81e-32	4.91e-30	14	20836662	20843388	+	Plau	plasminogen activator%2C urokinase [Source:MGI Symbol%3BAcc:MGI:97611]	GO:0001666:response to hypoxia;GO:0006508:proteolysis;GO:0010469:regulation of receptor activity;GO:0014909:smooth muscle cell migration;GO:0014910:regulation of smooth muscle cell migration;GO:0030335:positive regulation of cell migration;GO:0031639:plasminogen activation;GO:0033628:regulation of cell adhesion mediated by integrin;GO:0042127:regulation of cell proliferation;GO:0042730:fibrinolys…	GO:0005615:extracellular space;GO:0005925:focal adhesion;GO:0009986:cell surface;GO:0070062:extracellular exosome;	GO:0004252:serine-type endopeptidase activity;GO:0005515:protein binding;	K01348
ENSMUSG00000022421	916.743	1.66266	0.142003	11.7086	1.15e-31	5.75e-30	15	79786352	79804766	-	Nptxr	neuronal pentraxin receptor [Source:MGI Symbol%3BAcc:MGI:1920590]	GO:0031175:neuron projection development;	GO:0005886:plasma membrane;GO:0016021:integral component of membrane;	GO:0019903:protein phosphatase binding;GO:0046872:metal ion binding;	-
ENSMUSG00000112441	61.4125	4.47918	0.382604	11.7071	1.17e-31	5.84e-30	12	8291024	8293694	-	AC122860.2	-	-	-	-	-
ENSMUSG00000055737	1318.81	1.41363	0.120842	11.6981	1.3e-31	6.48e-30	15	3317760	3583492	-	Ghr	growth hormone receptor [Source:MGI Symbol%3BAcc:MGI:95708]	GO:0000255:allantoin metabolic process;GO:0006101:citrate metabolic process;GO:0006103:2-oxoglutarate metabolic process;GO:0006105:succinate metabolic process;GO:0006107:oxaloacetate metabolic process;GO:0006549:isoleucine metabolic process;GO:0006573:valine metabolic process;GO:0006600:creatine metabolic process;GO:0006631:fatty acid metabolic process;GO:0006897:endocytosis;GO:0019221:cytokine-m…	GO:0000932:cytoplasmic mRNA processing body;GO:0005576:extracellular region;GO:0005615:extracellular space;GO:0005634:nucleus;GO:0005829:cytosol;GO:0005886:plasma membrane;GO:0005887:integral component of plasma membrane;GO:0009986:cell surface;GO:0016021:integral component of membrane;GO:0019898:extrinsic component of membrane;GO:0043235:receptor complex;GO:0070195:growth hormone receptor comple…	GO:0004903:growth hormone receptor activity;GO:0005515:protein binding;GO:0017046:peptide hormone binding;GO:0019838:growth factor binding;GO:0042803:protein homodimerization activity;	K05080
ENSMUSG00000052684	4165.03	-1.23794	0.105856	-11.6945	1.36e-31	6.74e-30	4	95049034	95052222	-	Jun	jun proto-oncogene [Source:MGI Symbol%3BAcc:MGI:96646]	GO:0000122:negative regulation of transcription from RNA polymerase II promoter;GO:0001525:angiogenesis;GO:0001774:microglial cell activation;GO:0001836:release of cytochrome c from mitochondria;GO:0001889:liver development;GO:0001938:positive regulation of endothelial cell proliferation;GO:0003151:outflow tract morphogenesis;GO:0006355:regulation of transcription, DNA-templated;GO:0006366:transc…	GO:0000790:nuclear chromatin;GO:0005634:nucleus;GO:0005654:nucleoplasm;GO:0005667:transcription factor complex;GO:0005719:nuclear euchromatin;GO:0005829:cytosol;GO:0017053:transcriptional repressor complex;GO:0035976:AP1 complex;	GO:0000978:RNA polymerase II core promoter proximal region sequence-specific DNA binding;GO:0000980:RNA polymerase II distal enhancer sequence-specific DNA binding;GO:0000981:sequence-specific DNA binding RNA polymerase II transcription factor activity;GO:0000982:RNA polymerase II core promoter proximal region sequence-specific DNA binding transcription factor activity;GO:0001077:RNA polymerase I…	K04448
ENSMUSG00000058498	90.7577	3.38417	0.289396	11.6939	1.37e-31	6.77e-30	4	152307019	152318993	-	Rnf207	ring finger protein 207 [Source:MGI Symbol%3BAcc:MGI:2684989]	GO:0010628:positive regulation of gene expression;GO:1902261:positive regulation of delayed rectifier potassium channel activity;GO:1903762:positive regulation of voltage-gated potassium channel activity involved in ventricular cardiac muscle cell action potential repolarization;	GO:0048471:perinuclear region of cytoplasm;	GO:0008270:zinc ion binding;GO:0030544:Hsp70 protein binding;GO:0044325:ion channel binding;GO:0051087:chaperone binding;	-
ENSMUSG00000003037	1443.48	-1.04069	0.0891585	-11.6724	1.76e-31	8.7e-30	8	72161200	72183904	+	Rab8a	RAB8A%2C member RAS oncogene family [Source:MGI Symbol%3BAcc:MGI:96960]	GO:0006904:vesicle docking involved in exocytosis;GO:0006914:autophagy;GO:0007409:axonogenesis;GO:0009306:protein secretion;GO:0010506:regulation of autophagy;GO:0017157:regulation of exocytosis;GO:0032869:cellular response to insulin stimulus;GO:0048169:regulation of long-term neuronal synaptic plasticity;GO:0048210:Golgi vesicle fusion to target membrane;GO:0051223:regulation of protein transpo…	GO:0005813:centrosome;GO:0005814:centriole;GO:0005886:plasma membrane;GO:0005929:cilium;GO:0008021:synaptic vesicle;GO:0014069:postsynaptic density;GO:0030140:trans-Golgi network transport vesicle;GO:0030659:cytoplasmic vesicle membrane;GO:0030667:secretory granule membrane;GO:0030670:phagocytic vesicle membrane;GO:0031012:extracellular matrix;GO:0036064:ciliary basal body;GO:0043025:neuronal cel…	GO:0003924:GTPase activity;GO:0005515:protein binding;GO:0005525:GTP binding;GO:0017137:Rab GTPase binding;GO:0019003:GDP binding;GO:0019901:protein kinase binding;GO:0031489:myosin V binding;	K07901
ENSMUSG00000051177	54.6877	4.77799	0.409613	11.6646	1.93e-31	9.51e-30	2	134786067	135475258	+	Plcb1	phospholipase C%2C beta 1 [Source:MGI Symbol%3BAcc:MGI:97613]	GO:0000086:G2/M transition of mitotic cell cycle;GO:0001556:oocyte maturation;GO:0006397:mRNA processing;GO:0007155:cell adhesion;GO:0007165:signal transduction;GO:0007213:G-protein coupled acetylcholine receptor signaling pathway;GO:0007215:glutamate receptor signaling pathway;GO:0007420:brain development;GO:0007613:memory;GO:0008277:regulation of G-protein coupled receptor protein signaling pat…	GO:0000790:nuclear chromatin;GO:0005634:nucleus;GO:0005737:cytoplasm;GO:0005886:plasma membrane;GO:0016607:nuclear speck;GO:0031965:nuclear membrane;GO:0043209:myelin sheath;GO:0070062:extracellular exosome;	GO:0004435:phosphatidylinositol phospholipase C activity;GO:0004871:signal transducer activity;GO:0005096:GTPase activator activity;GO:0005509:calcium ion binding;GO:0005515:protein binding;GO:0005516:calmodulin binding;GO:0005521:lamin binding;GO:0005546:phosphatidylinositol-4,5-bisphosphate binding;GO:0019899:enzyme binding;GO:0042803:protein homodimerization activity;	K05858
ENSMUSG00000003814	11662.2	-0.983708	0.0843813	-11.6579	2.09e-31	1.03e-29	8	84841850	84846934	-	Calr	calreticulin [Source:MGI Symbol%3BAcc:MGI:88252]	GO:0000122:negative regulation of transcription from RNA polymerase II promoter;GO:0002502:peptide antigen assembly with MHC class I protein complex;GO:0006611:protein export from nucleus;GO:0006898:receptor-mediated endocytosis;GO:0007283:spermatogenesis;GO:0008284:positive regulation of cell proliferation;GO:0010595:positive regulation of endothelial cell migration;GO:0010628:positive regulatio…	GO:0001669:acrosomal vesicle;GO:0005576:extracellular region;GO:0005615:extracellular space;GO:0005634:nucleus;GO:0005737:cytoplasm;GO:0005783:endoplasmic reticulum;GO:0005788:endoplasmic reticulum lumen;GO:0005790:smooth endoplasmic reticulum;GO:0005794:Golgi apparatus;GO:0005829:cytosol;GO:0005844:polysome;GO:0005925:focal adhesion;GO:0009897:external side of plasma membrane;GO:0016020:membrane…	GO:0001948:glycoprotein binding;GO:0003723:RNA binding;GO:0003729:mRNA binding;GO:0005178:integrin binding;GO:0005506:iron ion binding;GO:0005509:calcium ion binding;GO:0005515:protein binding;GO:0030246:carbohydrate binding;GO:0031625:ubiquitin protein ligase binding;GO:0042277:peptide binding;GO:0042562:hormone binding;GO:0050681:androgen receptor binding;GO:0051082:unfolded protein binding;	K08057
ENSMUSG00000021367	133.537	2.85817	0.245234	11.6549	2.17e-31	1.06e-29	13	42301476	42307990	+	Edn1	endothelin 1 [Source:MGI Symbol%3BAcc:MGI:95283]	GO:0000122:negative regulation of transcription from RNA polymerase II promoter;GO:0001501:skeletal system development;GO:0001516:prostaglandin biosynthetic process;GO:0001569:patterning of blood vessels;GO:0001666:response to hypoxia;GO:0001701:in utero embryonic development;GO:0001821:histamine secretion;GO:0003100:regulation of systemic arterial blood pressure by endothelin;GO:0006885:regulati…	GO:0005615:extracellular space;GO:0005737:cytoplasm;GO:0033093:Weibel-Palade body;GO:0045178:basal part of cell;GO:0048237:rough endoplasmic reticulum lumen;	GO:0005102:receptor binding;GO:0005125:cytokine activity;GO:0005179:hormone activity;GO:0005515:protein binding;GO:0031707:endothelin A receptor binding;GO:0031708:endothelin B receptor binding;	K16366
ENSMUSG00000054072	58.8394	-5.50605	0.472722	-11.6476	2.36e-31	1.15e-29	18	60376029	60392627	+	Iigp1	interferon inducible GTPase 1 [Source:MGI Symbol%3BAcc:MGI:1926259]	GO:0010506:regulation of autophagy;GO:0019221:cytokine-mediated signaling pathway;GO:0035458:cellular response to interferon-beta;GO:0042832:defense response to protozoan;GO:0045087:innate immune response;GO:0050829:defense response to Gram-negative bacterium;	GO:0005789:endoplasmic reticulum membrane;GO:0020005:symbiont-containing vacuole membrane;GO:0031965:nuclear membrane;GO:0032580:Golgi cisterna membrane;	GO:0003924:GTPase activity;GO:0005525:GTP binding;GO:0019003:GDP binding;GO:0042802:identical protein binding;	-
ENSMUSG00000040146	170.416	2.99328	0.257407	11.6286	2.95e-31	1.44e-29	9	21968711	21989446	-	Rgl3	ral guanine nucleotide dissociation stimulator-like 3 [Source:MGI Symbol%3BAcc:MGI:1918996]	GO:0007264:small GTPase mediated signal transduction;GO:0043547:positive regulation of GTPase activity;	GO:0005622:intracellular;	GO:0005515:protein binding;GO:0008321:Ral guanyl-nucleotide exchange factor activity;GO:0017016:Ras GTPase binding;GO:0031267:small GTPase binding;	K17639
ENSMUSG00000039960	902.418	-1.23405	0.106256	-11.614	3.5e-31	1.7e-29	8	123653929	123663884	+	Rhou	ras homolog family member U [Source:MGI Symbol%3BAcc:MGI:1916831]	GO:0000082:G1/S transition of mitotic cell cycle;GO:0007010:cytoskeleton organization;GO:0008360:regulation of cell shape;GO:0016601:Rac protein signal transduction;GO:0030036:actin cytoskeleton organization;GO:1903955:positive regulation of protein targeting to mitochondrion;	GO:0000139:Golgi membrane;GO:0002102:podosome;GO:0005886:plasma membrane;GO:0005925:focal adhesion;GO:0042995:cell projection;	GO:0003924:GTPase activity;GO:0005525:GTP binding;GO:0046872:metal ion binding;	K07865
ENSMUSG00000056091	609.852	1.52478	0.131455	11.5993	4.16e-31	2.01e-29	6	72097592	72154571	+	St3gal5	ST3 beta-galactoside alpha-2%2C3-sialyltransferase 5 [Source:MGI Symbol%3BAcc:MGI:1339963]	GO:0009311:oligosaccharide metabolic process;GO:0018279:protein N-linked glycosylation via asparagine;GO:0097503:sialylation;	GO:0000139:Golgi membrane;GO:0016021:integral component of membrane;	GO:0047291:lactosylceramide alpha-2,3-sialyltransferase activity;	K03370
ENSMUSG00000039456	1072.62	-1.20319	0.103804	-11.591	4.58e-31	2.21e-29	16	93832121	93876072	+	Morc3	microrchidia 3 [Source:MGI Symbol%3BAcc:MGI:2136841]	GO:0006468:protein phosphorylation;GO:0007569:cell aging;GO:0009791:post-embryonic development;GO:0018105:peptidyl-serine phosphorylation;GO:0048147:negative regulation of fibroblast proliferation;GO:0050821:protein stabilization;GO:0051457:maintenance of protein location in nucleus;	GO:0005634:nucleus;GO:0005654:nucleoplasm;GO:0016363:nuclear matrix;GO:0016605:PML body;	GO:0003674:molecular_function;GO:0003723:RNA binding;GO:0008270:zinc ion binding;	-
ENSMUSG00000033149	4355.18	1.20583	0.104117	11.5815	5.11e-31	2.47e-29	16	45746243	45953598	-	Phldb2	pleckstrin homology like domain%2C family B%2C member 2 [Source:MGI Symbol%3BAcc:MGI:2444981]	GO:0000226:microtubule cytoskeleton organization;GO:0010470:regulation of gastrulation;GO:0010717:regulation of epithelial to mesenchymal transition;GO:0045184:establishment of protein localization;GO:0051497:negative regulation of stress fiber assembly;GO:0051895:negative regulation of focal adhesion assembly;GO:0070507:regulation of microtubule cytoskeleton organization;GO:1903690:negative regu…	GO:0005829:cytosol;GO:0005886:plasma membrane;GO:0005925:focal adhesion;GO:0031252:cell leading edge;GO:0045111:intermediate filament cytoskeleton;GO:0045180:basal cortex;	GO:0045296:cadherin binding;	-
ENSMUSG00000024236	1145.12	2.00343	0.173355	11.5568	6.82e-31	3.28e-29	18	4920540	5119299	+	Svil	supervillin [Source:MGI Symbol%3BAcc:MGI:2147319]	GO:0007010:cytoskeleton organization;GO:0007519:skeletal muscle tissue development;GO:0032467:positive regulation of cytokinesis;	GO:0002102:podosome;GO:0005634:nucleus;GO:0005737:cytoplasm;GO:0005829:cytosol;GO:0005886:plasma membrane;GO:0005925:focal adhesion;GO:0015629:actin cytoskeleton;GO:0030496:midbody;GO:0032154:cleavage furrow;GO:0036449:microtubule minus-end;GO:0043034:costamere;GO:0071437:invadopodium;	GO:0051015:actin filament binding;	K10369
ENSMUSG00000051323	3620.56	-1.0226	0.0884857	-11.5567	6.83e-31	3.28e-29	X	133582860	133688987	-	Pcdh19	protocadherin 19 [Source:MGI Symbol%3BAcc:MGI:2685563]	GO:0007155:cell adhesion;GO:0007156:homophilic cell adhesion via plasma membrane adhesion molecules;GO:0007267:cell-cell signaling;GO:0007399:nervous system development;GO:0007420:brain development;	GO:0005887:integral component of plasma membrane;	GO:0005509:calcium ion binding;	K16499
ENSMUSG00000027221	208.064	1.97038	0.170692	11.5435	7.96e-31	3.81e-29	2	92599707	92615250	+	Chst1	carbohydrate (keratan sulfate Gal-6) sulfotransferase 1 [Source:MGI Symbol%3BAcc:MGI:1924219]	GO:0006012:galactose metabolic process;GO:0006790:sulfur compound metabolic process;GO:0006954:inflammatory response;GO:0042339:keratan sulfate metabolic process;	GO:0000139:Golgi membrane;GO:0016021:integral component of membrane;	GO:0001517:N-acetylglucosamine 6-O-sulfotransferase activity;GO:0008146:sulfotransferase activity;GO:0045130:keratan sulfotransferase activity;	K01022
ENSMUSG00000027510	1155.95	-1.37653	0.119443	-11.5245	9.92e-31	4.74e-29	2	173020498	173034734	+	Rbm38	RNA binding motif protein 38 [Source:MGI Symbol%3BAcc:MGI:1889294]	GO:0006397:mRNA processing;GO:0006977:DNA damage response, signal transduction by p53 class mediator resulting in cell cycle arrest;GO:0006978:DNA damage response, signal transduction by p53 class mediator resulting in transcription of p21 class mediator;GO:0008285:negative regulation of cell proliferation;GO:0008380:RNA splicing;GO:0010830:regulation of myotube differentiation;GO:0030154:cell di…	GO:0005634:nucleus;GO:0005829:cytosol;	GO:0003723:RNA binding;GO:0003729:mRNA binding;GO:0003730:mRNA 3'-UTR binding;	-
ENSMUSG00000005470	567.801	-1.2872	0.111714	-11.5223	1.02e-30	4.85e-29	8	83955507	83970197	+	Asf1b	anti-silencing function 1B histone chaperone [Source:MGI Symbol%3BAcc:MGI:1914179]	GO:0006334:nucleosome assembly;GO:0006335:DNA replication-dependent nucleosome assembly;GO:0006336:DNA replication-independent nucleosome assembly;GO:0006351:transcription, DNA-templated;GO:0006355:regulation of transcription, DNA-templated;GO:0016569:covalent chromatin modification;	GO:0000785:chromatin;GO:0000790:nuclear chromatin;GO:0005654:nucleoplasm;GO:0043234:protein complex;	GO:0042393:histone binding;	K10753
ENSMUSG00000039706	97.2604	2.91025	0.252602	11.5211	1.03e-30	4.91e-29	5	44472132	44799680	-	Ldb2	LIM domain binding 2 [Source:MGI Symbol%3BAcc:MGI:894670]	GO:0001942:hair follicle development;GO:0010669:epithelial structure maintenance;GO:0030334:regulation of cell migration;GO:0035019:somatic stem cell maintenance;GO:0043549:regulation of kinase activity;GO:0044089:positive regulation of cellular component biogenesis;GO:0045944:positive regulation of transcription from RNA polymerase II promoter;	GO:0005634:nucleus;GO:0005667:transcription factor complex;GO:0005730:nucleolus;GO:0005886:plasma membrane;GO:0031252:cell leading edge;	GO:0000989:transcription factor binding transcription factor activity;GO:0005515:protein binding;GO:0019899:enzyme binding;GO:0030274:LIM domain binding;	K15617
ENSMUSG00000015619	92.1769	3.06282	0.26595	11.5165	1.09e-30	5.16e-29	2	9857078	9890034	-	Gata3	GATA binding protein 3 [Source:MGI Symbol%3BAcc:MGI:95663]	GO:0000122:negative regulation of transcription from RNA polymerase II promoter;GO:0000902:cell morphogenesis;GO:0001701:in utero embryonic development;GO:0001709:cell fate determination;GO:0001764:neuron migration;GO:0001775:cell activation;GO:0001806:type IV hypersensitivity;GO:0001819:positive regulation of cytokine production;GO:0001822:kidney development;GO:0001823:mesonephros development;GO…	GO:0000790:nuclear chromatin;GO:0005634:nucleus;GO:0005654:nucleoplasm;GO:0005667:transcription factor complex;	GO:0000976:transcription regulatory region sequence-specific DNA binding;GO:0000977:RNA polymerase II regulatory region sequence-specific DNA binding;GO:0000979:RNA polymerase II core promoter sequence-specific DNA binding;GO:0000987:core promoter proximal region sequence-specific DNA binding;GO:0001046:core promoter sequence-specific DNA binding;GO:0001077:RNA polymerase II core promoter proxima…	K17895
ENSMUSG00000017009	4035.28	-1.26568	0.110021	-11.5039	1.26e-30	5.96e-29	2	164424247	164443887	-	Sdc4	syndecan 4 [Source:MGI Symbol%3BAcc:MGI:1349164]	GO:0001657:ureteric bud development;GO:0001843:neural tube closure;GO:0006024:glycosaminoglycan biosynthetic process;GO:0007165:signal transduction;GO:0010762:regulation of fibroblast migration;GO:0042060:wound healing;GO:0042130:negative regulation of T cell proliferation;GO:0045860:positive regulation of protein kinase activity;GO:0051496:positive regulation of stress fiber assembly;GO:0051894:…	GO:0005796:Golgi lumen;GO:0005925:focal adhesion;GO:0009986:cell surface;GO:0016021:integral component of membrane;GO:0043034:costamere;GO:0045121:membrane raft;GO:0070062:extracellular exosome;	GO:0001968:fibronectin binding;GO:0005080:protein kinase C binding;GO:0005515:protein binding;GO:0070053:thrombospondin receptor activity;	K16338
ENSMUSG00000029669	54.2946	4.53194	0.394319	11.4931	1.43e-30	6.74e-29	6	21771395	21852515	-	Tspan12	tetraspanin 12 [Source:MGI Symbol%3BAcc:MGI:1889818]	GO:0001525:angiogenesis;GO:0007166:cell surface receptor signaling pathway;GO:0010842:retina layer formation;GO:0045765:regulation of angiogenesis;	GO:0005887:integral component of plasma membrane;	GO:0042813:Wnt-activated receptor activity;	K17355
ENSMUSG00000004864	63.4518	4.65062	0.4048	11.4887	1.5e-30	7.07e-29	17	28769307	28778698	+	Mapk13	mitogen-activated protein kinase 13 [Source:MGI Symbol%3BAcc:MGI:1346864]	GO:0000165:MAPK cascade;GO:0006351:transcription, DNA-templated;GO:0006355:regulation of transcription, DNA-templated;GO:0006970:response to osmotic stress;GO:0007005:mitochondrion organization;GO:0007049:cell cycle;GO:0010468:regulation of gene expression;GO:0018105:peptidyl-serine phosphorylation;GO:0032755:positive regulation of interleukin-6 production;GO:0035556:intracellular signal transduc…	GO:0005634:nucleus;GO:0005654:nucleoplasm;GO:0005737:cytoplasm;	GO:0004674:protein serine/threonine kinase activity;GO:0004707:MAP kinase activity;GO:0005524:ATP binding;	-
ENSMUSG00000019102	68.9379	-3.70386	0.32271	-11.4774	1.71e-30	8.05e-29	11	61207537	61218421	+	Aldh3a1	aldehyde dehydrogenase family 3%2C subfamily A1 [Source:MGI Symbol%3BAcc:MGI:1353451]	GO:0001666:response to hypoxia;GO:0006081:cellular aldehyde metabolic process;GO:0007568:aging;GO:0007584:response to nutrient;GO:0008284:positive regulation of cell proliferation;GO:0042493:response to drug;GO:0051384:response to glucocorticoid;GO:0051591:response to cAMP;GO:0055114:oxidation-reduction process;	GO:0005615:extracellular space;GO:0005737:cytoplasm;GO:0005783:endoplasmic reticulum;GO:0005829:cytosol;GO:0005886:plasma membrane;GO:0016021:integral component of membrane;	GO:0004028:3-chloroallyl aldehyde dehydrogenase activity;GO:0004029:aldehyde dehydrogenase (NAD) activity;GO:0004030:aldehyde dehydrogenase [NAD(P)+] activity;GO:0008106:alcohol dehydrogenase (NADP+) activity;GO:0016620:oxidoreductase activity, acting on the aldehyde or oxo group of donors, NAD or NADP as acceptor;GO:0018479:benzaldehyde dehydrogenase (NAD+) activity;	K00129
ENSMUSG00000064080	15313.2	1.69913	0.148628	11.4321	2.89e-30	1.35e-28	6	91212455	91272540	+	Fbln2	fibulin 2 [Source:MGI Symbol%3BAcc:MGI:95488]	GO:0010811:positive regulation of cell-substrate adhesion;	GO:0005578:proteinaceous extracellular matrix;GO:0005615:extracellular space;GO:0031012:extracellular matrix;GO:0070062:extracellular exosome;GO:1903561:extracellular vesicle;	GO:0005509:calcium ion binding;GO:0005515:protein binding;GO:0050840:extracellular matrix binding;	K17307
ENSMUSG00000052560	258.52	1.83121	0.160187	11.4317	2.9e-30	1.36e-28	15	90487482	90679432	-	Cpne8	copine VIII [Source:MGI Symbol%3BAcc:MGI:1914121]	GO:0008150:biological_process;	GO:0070062:extracellular exosome;	GO:0003674:molecular_function;	-
ENSMUSG00000097715	579.686	1.58768	0.139408	11.3887	4.76e-30	2.22e-28	13	12615057	12650388	-	Gpr137b-ps	G protein-coupled receptor 137B%2C pseudogene [Source:MGI Symbol%3BAcc:MGI:3710533]	-	-	-	-
ENSMUSG00000068015	272.04	1.99022	0.175361	11.3493	7.48e-30	3.48e-28	14	74754674	74947877	-	Lrch1	leucine-rich repeats and calponin homology (CH) domain containing 1 [Source:MGI Symbol%3BAcc:MGI:2443390]	GO:0007165:signal transduction;	GO:0005886:plasma membrane;	GO:0003674:molecular_function;	-
ENSMUSG00000029167	49.647	5.1978	0.45821	11.3437	7.97e-30	3.69e-28	5	51454250	51567726	-	Ppargc1a	peroxisome proliferative activated receptor%2C gamma%2C coactivator 1 alpha [Source:MGI Symbol%3BAcc:MGI:1342774]	GO:0000302:response to reactive oxygen species;GO:0000422:mitochondrion degradation;GO:0001933:negative regulation of protein phosphorylation;GO:0002021:response to dietary excess;GO:0002931:response to ischemia;GO:0006012:galactose metabolic process;GO:0006094:gluconeogenesis;GO:0006351:transcription, DNA-templated;GO:0006355:regulation of transcription, DNA-templated;GO:0007005:mitochondrion or…	GO:0005634:nucleus;GO:0005654:nucleoplasm;GO:0005719:nuclear euchromatin;GO:0016605:PML body;GO:0022626:cytosolic ribosome;GO:0043025:neuronal cell body;GO:0043231:intracellular membrane-bounded organelle;GO:0097440:apical dendrite;	GO:0001104:RNA polymerase II transcription cofactor activity;GO:0003677:DNA binding;GO:0003713:transcription coactivator activity;GO:0003723:RNA binding;GO:0005515:protein binding;GO:0008134:transcription factor binding;GO:0016922:ligand-dependent nuclear receptor binding;GO:0030331:estrogen receptor binding;GO:0030374:ligand-dependent nuclear receptor transcription coactivator activity;GO:003149…	K07202
ENSMUSG00000105987	1365.67	1.57595	0.13897	11.3402	8.3e-30	3.84e-28	5	23698296	23712667	-	AI506816	expressed sequence AI506816 [Source:MGI Symbol%3BAcc:MGI:2140929]	-	-	-	-
ENSMUSG00000052512	237.548	2.34741	0.207554	11.3099	1.17e-29	5.41e-28	7	48908716	49610090	+	Nav2	neuron navigator 2 [Source:MGI Symbol%3BAcc:MGI:2183691]	GO:0003025:regulation of systemic arterial blood pressure by baroreceptor feedback;GO:0007605:sensory perception of sound;GO:0007608:sensory perception of smell;GO:0007626:locomotory behavior;GO:0021554:optic nerve development;GO:0021563:glossopharyngeal nerve development;GO:0021564:vagus nerve development;	GO:0005578:proteinaceous extracellular matrix;GO:0005614:interstitial matrix;GO:0005654:nucleoplasm;	GO:0008201:heparin binding;	K19483
ENSMUSG00000038402	216.096	1.97434	0.174597	11.308	1.2e-29	5.51e-28	13	31625816	31631403	+	Foxf2	forkhead box F2 [Source:MGI Symbol%3BAcc:MGI:1347479]	GO:0006366:transcription from RNA polymerase II promoter;GO:0030154:cell differentiation;GO:0030198:extracellular matrix organization;GO:0042249:establishment of planar polarity of embryonic epithelium;GO:0045892:negative regulation of transcription, DNA-templated;GO:0045893:positive regulation of transcription, DNA-templated;GO:0045944:positive regulation of transcription from RNA polymerase II …	GO:0005634:nucleus;GO:0005667:transcription factor complex;	GO:0000977:RNA polymerase II regulatory region sequence-specific DNA binding;GO:0001228:RNA polymerase II transcription regulatory region sequence-specific DNA binding transcription factor activity involved in positive regulation of transcription;GO:0003677:DNA binding;GO:0003700:sequence-specific DNA binding transcription factor activity;GO:0003705:RNA polymerase II distal enhancer sequence-spec…	K09399
ENSMUSG00000034771	315.224	2.1813	0.193003	11.3019	1.28e-29	5.9e-28	10	81574561	81590845	+	Tle2	transducin-like enhancer of split 2 [Source:MGI Symbol%3BAcc:MGI:104635]	GO:0006351:transcription, DNA-templated;GO:0016055:Wnt signaling pathway;GO:0045892:negative regulation of transcription, DNA-templated;GO:0090090:negative regulation of canonical Wnt signaling pathway;	GO:0005615:extracellular space;GO:0005634:nucleus;GO:0005925:focal adhesion;GO:0016604:nuclear body;	GO:0003714:transcription corepressor activity;	-
ENSMUSG00000027684	787.865	1.37004	0.12164	11.263	2e-29	9.15e-28	3	29951296	30548008	-	Mecom	MDS1 and EVI1 complex locus [Source:MGI Symbol%3BAcc:MGI:95457]	GO:0001701:in utero embryonic development;GO:0001780:neutrophil homeostasis;GO:0006366:transcription from RNA polymerase II promoter;GO:0006915:apoptotic process;GO:0006954:inflammatory response;GO:0009617:response to bacterium;GO:0009791:post-embryonic development;GO:0030154:cell differentiation;GO:0030900:forebrain development;GO:0035115:embryonic forelimb morphogenesis;GO:0035116:embryonic hin…	GO:0000118:histone deacetylase complex;GO:0005634:nucleus;GO:0016607:nuclear speck;	GO:0000977:RNA polymerase II regulatory region sequence-specific DNA binding;GO:0001228:RNA polymerase II transcription regulatory region sequence-specific DNA binding transcription factor activity involved in positive regulation of transcription;GO:0003677:DNA binding;GO:0003700:sequence-specific DNA binding transcription factor activity;GO:0005515:protein binding;GO:0042803:protein homodimeriza…	K04462
ENSMUSG00000026620	377.764	-2.05925	0.183147	-11.2437	2.49e-29	1.14e-27	1	184896789	184999570	-	Mark1	MAP/microtubule affinity regulating kinase 1 [Source:MGI Symbol%3BAcc:MGI:2664902]	GO:0000226:microtubule cytoskeleton organization;GO:0001764:neuron migration;GO:0006468:protein phosphorylation;GO:0016055:Wnt signaling pathway;GO:0030010:establishment of cell polarity;GO:0035556:intracellular signal transduction;	GO:0005737:cytoplasm;GO:0005856:cytoskeleton;GO:0005886:plasma membrane;	GO:0000287:magnesium ion binding;GO:0001786:phosphatidylserine binding;GO:0004674:protein serine/threonine kinase activity;GO:0005524:ATP binding;GO:0005546:phosphatidylinositol-4,5-bisphosphate binding;GO:0050321:tau-protein kinase activity;GO:0070300:phosphatidic acid binding;	K08798;K12132
ENSMUSG00000028036	145.408	-2.04073	0.182009	-11.2122	3.55e-29	1.62e-27	3	151796502	151837630	-	Ptgfr	prostaglandin F receptor [Source:MGI Symbol%3BAcc:MGI:97796]	GO:0007186:G-protein coupled receptor signaling pathway;GO:0008284:positive regulation of cell proliferation;GO:0010628:positive regulation of gene expression;GO:0032355:response to estradiol;GO:0032496:response to lipopolysaccharide;GO:0035584:calcium-mediated signaling using intracellular calcium source;GO:0043066:negative regulation of apoptotic process;GO:0071799:cellular response to prostagl…	GO:0005576:extracellular region;GO:0005737:cytoplasm;GO:0005886:plasma membrane;GO:0016021:integral component of membrane;	GO:0004958:prostaglandin F receptor activity;	K04262
ENSMUSG00000040945	8491.82	-0.984978	0.0878662	-11.21	3.64e-29	1.66e-27	4	140700541	140723220	+	Rcc2	regulator of chromosome condensation 2 [Source:MGI Symbol%3BAcc:MGI:1919784]	GO:0007049:cell cycle;GO:0007229:integrin-mediated signaling pathway;GO:0010762:regulation of fibroblast migration;GO:0010971:positive regulation of G2/M transition of mitotic cell cycle;GO:0030334:regulation of cell migration;GO:0034260:negative regulation of GTPase activity;GO:0045184:establishment of protein localization;GO:0048041:focal adhesion assembly;GO:0051301:cell division;GO:0051895:ne…	GO:0005634:nucleus;GO:0005730:nucleolus;GO:0005874:microtubule;GO:0005886:plasma membrane;GO:0016020:membrane;GO:0030496:midbody;GO:0031901:early endosome membrane;GO:0034506:chromosome, centromeric core domain;GO:1990023:mitotic spindle midzone;	GO:0003723:RNA binding;GO:0008017:microtubule binding;GO:0019901:protein kinase binding;GO:0019904:protein domain specific binding;GO:0031267:small GTPase binding;GO:0048365:Rac GTPase binding;	-
ENSMUSG00000027506	859.483	-1.7888	0.159611	-11.2073	3.76e-29	1.7e-27	3	8925593	9004723	-	Tpd52	tumor protein D52 [Source:MGI Symbol%3BAcc:MGI:107749]	GO:0008284:positive regulation of cell proliferation;GO:0030183:B cell differentiation;	GO:0005737:cytoplasm;GO:0005783:endoplasmic reticulum;GO:0048471:perinuclear region of cytoplasm;	GO:0005509:calcium ion binding;GO:0005515:protein binding;GO:0042803:protein homodimerization activity;GO:0046982:protein heterodimerization activity;	-
ENSMUSG00000060988	158.775	-2.05195	0.183184	-11.2016	4.01e-29	1.81e-27	2	54436317	55118309	+	Galnt13	UDP-N-acetyl-alpha-D-galactosamine:polypeptide N-acetylgalactosaminyltransferase 13 [Source:MGI Symbol%3BAcc:MGI:2139447]	GO:0006493:protein O-linked glycosylation;	GO:0000139:Golgi membrane;GO:0016021:integral component of membrane;	GO:0004653:polypeptide N-acetylgalactosaminyltransferase activity;GO:0030246:carbohydrate binding;GO:0046872:metal ion binding;	K00710
ENSMUSG00000003949	868.308	1.47487	0.131765	11.1932	4.4e-29	1.99e-27	11	90336536	90390895	-	Hlf	hepatic leukemia factor [Source:MGI Symbol%3BAcc:MGI:96108]	GO:0006366:transcription from RNA polymerase II promoter;GO:0035914:skeletal muscle cell differentiation;GO:0045944:positive regulation of transcription from RNA polymerase II promoter;GO:0048511:rhythmic process;	GO:0005634:nucleus;	GO:0000977:RNA polymerase II regulatory region sequence-specific DNA binding;GO:0001077:RNA polymerase II core promoter proximal region sequence-specific DNA binding transcription factor activity involved in positive regulation of transcription;GO:0001228:RNA polymerase II transcription regulatory region sequence-specific DNA binding transcription factor activity involved in positive regulation o…	K09057
ENSMUSG00000036437	52.7499	4.38551	0.391955	11.1888	4.63e-29	2.08e-27	8	66697192	66706792	+	Npy1r	neuropeptide Y receptor Y1 [Source:MGI Symbol%3BAcc:MGI:104963]	GO:0003151:outflow tract morphogenesis;GO:0006006:glucose metabolic process;GO:0007218:neuropeptide signaling pathway;GO:0007268:synaptic transmission;GO:0007626:locomotory behavior;GO:0007631:feeding behavior;GO:0008217:regulation of blood pressure;GO:0019233:sensory perception of pain;GO:0040014:regulation of multicellular organism growth;	GO:0005886:plasma membrane;GO:0016021:integral component of membrane;	GO:0001601:peptide YY receptor activity;GO:0001602:pancreatic polypeptide receptor activity;GO:0004983:neuropeptide Y receptor activity;	K04204
ENSMUSG00000047143	132.101	3.55953	0.318494	11.1761	5.34e-29	2.4e-27	4	109978053	109983687	+	Dmrta2	doublesex and mab-3 related transcription factor like family A2 [Source:MGI Symbol%3BAcc:MGI:2653629]	GO:0002052:positive regulation of neuroblast proliferation;GO:0006355:regulation of transcription, DNA-templated;GO:0021796:cerebral cortex regionalization;GO:0035914:skeletal muscle cell differentiation;GO:0048665:neuron fate specification;GO:0071542:dopaminergic neuron differentiation;	GO:0005634:nucleus;	GO:0003700:sequence-specific DNA binding transcription factor activity;GO:0042803:protein homodimerization activity;GO:0043565:sequence-specific DNA binding;GO:0046872:metal ion binding;GO:0046982:protein heterodimerization activity;	K19491
ENSMUSG00000046441	631.803	-1.18556	0.106291	-11.1539	6.85e-29	3.07e-27	8	110215665	110224486	+	Cmtr2	cap methyltransferase 2 [Source:MGI Symbol%3BAcc:MGI:2384580]	GO:0006370:7-methylguanosine mRNA capping;GO:0097310:cap2 mRNA methylation;	GO:0005634:nucleus;GO:0005737:cytoplasm;	GO:0004483:mRNA (nucleoside-2'-O-)-methyltransferase activity;	K14590
ENSMUSG00000045991	86.9919	-2.98538	0.267727	-11.1508	7.09e-29	3.17e-27	18	64340364	64398488	+	Onecut2	one cut domain%2C family member 2 [Source:MGI Symbol%3BAcc:MGI:1891408]	GO:0001889:liver development;GO:0001952:regulation of cell-matrix adhesion;GO:0002064:epithelial cell development;GO:0006366:transcription from RNA polymerase II promoter;GO:0009653:anatomical structure morphogenesis;GO:0030335:positive regulation of cell migration;GO:0030512:negative regulation of transforming growth factor beta receptor signaling pathway;GO:0031016:pancreas development;GO:00310…	GO:0005634:nucleus;GO:0005654:nucleoplasm;GO:0015629:actin cytoskeleton;	GO:0000978:RNA polymerase II core promoter proximal region sequence-specific DNA binding;GO:0001077:RNA polymerase II core promoter proximal region sequence-specific DNA binding transcription factor activity involved in positive regulation of transcription;GO:0003677:DNA binding;GO:0003700:sequence-specific DNA binding transcription factor activity;	-
ENSMUSG00000038375	760.013	-1.24016	0.111301	-11.1424	7.8e-29	3.48e-27	2	155381059	155389850	+	Trp53inp2	transformation related protein 53 inducible nuclear protein 2 [Source:MGI Symbol%3BAcc:MGI:1915978]	-	-	-	-
ENSMUSG00000026202	920.603	-1.79839	0.161419	-11.1411	7.91e-29	3.53e-27	1	75214228	75219865	-	Tuba4a	tubulin%2C alpha 4A [Source:MGI Symbol%3BAcc:MGI:1095410]	GO:0007010:cytoskeleton organization;GO:0007017:microtubule-based process;	GO:0005737:cytoplasm;GO:0005874:microtubule;GO:0015630:microtubule cytoskeleton;GO:0070062:extracellular exosome;	GO:0003924:GTPase activity;GO:0005200:structural constituent of cytoskeleton;GO:0005525:GTP binding;GO:0019899:enzyme binding;	K07374
ENSMUSG00000085936	51.5116	4.26093	0.382657	11.1351	8.46e-29	3.76e-27	13	28460034	28885620	-	2610307P16Rik	RIKEN cDNA 2610307P16 gene [Source:MGI Symbol%3BAcc:MGI:1919768]	-	-	-	-
ENSMUSG00000067377	110.143	3.42786	0.307847	11.1349	8.48e-29	3.76e-27	X	133891068	133898429	-	Tspan6	tetraspanin 6 [Source:MGI Symbol%3BAcc:MGI:1926264]	GO:0007166:cell surface receptor signaling pathway;GO:0039532:negative regulation of viral-induced cytoplasmic pattern recognition receptor signaling pathway;GO:0043123:positive regulation of I-kappaB kinase/NF-kappaB signaling;GO:1901223:negative regulation of NIK/NF-kappaB signaling;	GO:0005887:integral component of plasma membrane;GO:0070062:extracellular exosome;	GO:0004871:signal transducer activity;	-
ENSMUSG00000089901	569.475	1.64989	0.148675	11.0973	1.29e-28	5.72e-27	14	43925390	43933411	+	Gm8113	predicted gene 8113 [Source:MGI Symbol%3BAcc:MGI:3648791]	GO:0008150:biological_process;	GO:0005575:cellular_component;GO:0016021:integral component of membrane;	GO:0003674:molecular_function;	-
ENSMUSG00000043613	93.3527	-2.9597	0.267402	-11.0683	1.79e-28	7.88e-27	9	7445822	7455975	+	Mmp3	matrix metallopeptidase 3 [Source:MGI Symbol%3BAcc:MGI:97010]	GO:0006508:proteolysis;GO:0010727:negative regulation of hydrogen peroxide metabolic process;GO:0022617:extracellular matrix disassembly;GO:0030163:protein catabolic process;GO:0030334:regulation of cell migration;GO:0030574:collagen catabolic process;GO:0032461:positive regulation of protein oligomerization;GO:0051898:negative regulation of protein kinase B signaling;GO:0071230:cellular response…	GO:0005576:extracellular region;GO:0005578:proteinaceous extracellular matrix;GO:0005615:extracellular space;GO:0005739:mitochondrion;GO:0005829:cytosol;	GO:0004175:endopeptidase activity;GO:0004222:metalloendopeptidase activity;GO:0004252:serine-type endopeptidase activity;GO:0008237:metallopeptidase activity;GO:0008270:zinc ion binding;	K01394
ENSMUSG00000028961	6303.55	-0.911838	0.0823835	-11.0682	1.79e-28	7.88e-27	4	149149991	149166771	-	Pgd	phosphogluconate dehydrogenase [Source:MGI Symbol%3BAcc:MGI:97553]	GO:0006098:pentose-phosphate shunt;GO:0009051:pentose-phosphate shunt, oxidative branch;GO:0019322:pentose biosynthetic process;GO:0019521:D-gluconate metabolic process;GO:0055114:oxidation-reduction process;	GO:0005634:nucleus;GO:0005737:cytoplasm;GO:0070062:extracellular exosome;	GO:0004616:phosphogluconate dehydrogenase (decarboxylating) activity;	K00033
ENSMUSG00000031273	57.2029	-4.44539	0.401775	-11.0644	1.87e-28	8.2e-27	X	141165403	141474076	-	Col4a6	collagen%2C type IV%2C alpha 6 [Source:MGI Symbol%3BAcc:MGI:2152695]	GO:0030198:extracellular matrix organization;GO:0038063:collagen-activated tyrosine kinase receptor signaling pathway;GO:0071230:cellular response to amino acid stimulus;	GO:0005587:collagen type IV trimer;GO:0005604:basement membrane;	GO:0005198:structural molecule activity;GO:0005201:extracellular matrix structural constituent;	K06237
ENSMUSG00000028111	1214.68	-1.70611	0.154265	-11.0596	1.97e-28	8.63e-27	3	95499256	95509362	+	Ctsk	cathepsin K [Source:MGI Symbol%3BAcc:MGI:107823]	GO:0001957:intramembranous ossification;GO:0030574:collagen catabolic process;GO:0045453:bone resorption;GO:0051603:proteolysis involved in cellular protein catabolic process;GO:1903146:regulation of mitochondrion degradation;GO:1903955:positive regulation of protein targeting to mitochondrion;	GO:0005615:extracellular space;GO:0005654:nucleoplasm;GO:0005764:lysosome;GO:0043231:intracellular membrane-bounded organelle;	GO:0001968:fibronectin binding;GO:0004197:cysteine-type endopeptidase activity;GO:0005518:collagen binding;GO:0043394:proteoglycan binding;	K01371
ENSMUSG00000039997	79.9782	2.86377	0.259056	11.0546	2.08e-28	9.11e-27	1	173920407	173942672	-	Ifi203	interferon activated gene 203 [Source:MGI Symbol%3BAcc:MGI:96428]	GO:0000122:negative regulation of transcription from RNA polymerase II promoter;GO:0035458:cellular response to interferon-beta;	GO:0005634:nucleus;GO:0005730:nucleolus;GO:0005829:cytosol;GO:0016020:membrane;	GO:0000978:RNA polymerase II core promoter proximal region sequence-specific DNA binding;GO:0001047:core promoter binding;GO:0001078:RNA polymerase II core promoter proximal region sequence-specific DNA binding transcription factor activity involved in negative regulation of transcription;GO:0003690:double-stranded DNA binding;GO:0003723:RNA binding;GO:0008134:transcription factor binding;GO:0042…	-
ENSMUSG00000020788	119.697	2.59925	0.235234	11.0497	2.2e-28	9.6e-27	11	72961169	72993044	+	Atp2a3	ATPase%2C Ca++ transporting%2C ubiquitous [Source:MGI Symbol%3BAcc:MGI:1194503]	GO:0070588:calcium ion transmembrane transport;	GO:0005783:endoplasmic reticulum;GO:0016021:integral component of membrane;GO:0016529:sarcoplasmic reticulum;GO:0033017:sarcoplasmic reticulum membrane;	GO:0005388:calcium-transporting ATPase activity;GO:0005515:protein binding;GO:0005524:ATP binding;GO:0046872:metal ion binding;	K05853
ENSMUSG00000062012	63.1628	3.39629	0.307467	11.046	2.29e-28	9.98e-27	17	23575845	23599487	-	Zfp13	zinc finger protein 13 [Source:MGI Symbol%3BAcc:MGI:99159]	GO:0000122:negative regulation of transcription from RNA polymerase II promoter;GO:0010729:positive regulation of hydrogen peroxide biosynthetic process;GO:1901030:positive regulation of mitochondrial outer membrane permeabilization involved in apoptotic signaling pathway;	GO:0005634:nucleus;GO:0005739:mitochondrion;	GO:0000977:RNA polymerase II regulatory region sequence-specific DNA binding;GO:0001227:RNA polymerase II transcription regulatory region sequence-specific DNA binding transcription factor activity involved in negative regulation of transcription;GO:0046872:metal ion binding;	K09228
ENSMUSG00000028330	2059.89	-0.844912	0.0766076	-11.0291	2.77e-28	1.2e-26	4	46138613	46172403	+	Ncbp1	nuclear cap binding protein subunit 1 [Source:MGI Symbol%3BAcc:MGI:1891840]	GO:0000184:nuclear-transcribed mRNA catabolic process, nonsense-mediated decay;GO:0000245:spliceosomal complex assembly;GO:0000398:mRNA splicing, via spliceosome;GO:0006370:7-methylguanosine mRNA capping;GO:0006406:mRNA export from nucleus;GO:0006446:regulation of translational initiation;GO:0030307:positive regulation of cell growth;GO:0031053:primary miRNA processing;GO:0031442:positive regulat…	GO:0005634:nucleus;GO:0005654:nucleoplasm;GO:0005739:mitochondrion;GO:0005829:cytosol;GO:0005845:mRNA cap binding complex;GO:0005846:nuclear cap binding complex;GO:0030529:ribonucleoprotein complex;GO:0034518:RNA cap binding complex;	GO:0000339:RNA cap binding;GO:0000340:RNA 7-methylguanosine cap binding;GO:0003723:RNA binding;GO:0003729:mRNA binding;GO:0005515:protein binding;	K12882
ENSMUSG00000045180	143.917	2.56558	0.23262	11.029	2.77e-28	1.2e-26	X	152609509	152769465	-	Shroom2	shroom family member 2 [Source:MGI Symbol%3BAcc:MGI:107194]	GO:0000902:cell morphogenesis;GO:0002089:lens morphogenesis in camera-type eye;GO:0007420:brain development;GO:0008057:eye pigment granule organization;GO:0016477:cell migration;GO:0030835:negative regulation of actin filament depolymerization;GO:0032401:establishment of melanosome localization;GO:0032438:melanosome organization;GO:0043010:camera-type eye development;GO:0043482:cellular pigment a…	GO:0005737:cytoplasm;GO:0005856:cytoskeleton;GO:0005874:microtubule;GO:0005886:plasma membrane;GO:0005911:cell-cell junction;GO:0005913:cell-cell adherens junction;GO:0005923:bicellular tight junction;GO:0005938:cell cortex;GO:0016324:apical plasma membrane;GO:0030864:cortical actin cytoskeleton;GO:0031941:filamentous actin;GO:0043025:neuronal cell body;GO:0043296:apical junction complex;GO:00700…	GO:0003779:actin binding;GO:0005515:protein binding;GO:0008013:beta-catenin binding;GO:0019904:protein domain specific binding;GO:0051015:actin filament binding;	K18625
ENSMUSG00000000440	149.813	2.22734	0.202107	11.0206	3.04e-28	1.31e-26	6	115360951	115490399	+	Pparg	peroxisome proliferator activated receptor gamma [Source:MGI Symbol%3BAcc:MGI:97747]	GO:0000122:negative regulation of transcription from RNA polymerase II promoter;GO:0001818:negative regulation of cytokine production;GO:0001890:placenta development;GO:0002021:response to dietary excess;GO:0002024:diet induced thermogenesis;GO:0006355:regulation of transcription, DNA-templated;GO:0006357:regulation of transcription from RNA polymerase II promoter;GO:0006366:transcription from RN…	GO:0005634:nucleus;GO:0005654:nucleoplasm;GO:0005737:cytoplasm;GO:0005829:cytosol;GO:0043231:intracellular membrane-bounded organelle;GO:0043234:protein complex;GO:0090575:RNA polymerase II transcription factor complex;	GO:0001012:RNA polymerase II regulatory region DNA binding;GO:0001046:core promoter sequence-specific DNA binding;GO:0001228:RNA polymerase II transcription regulatory region sequence-specific DNA binding transcription factor activity involved in positive regulation of transcription;GO:0003677:DNA binding;GO:0003682:chromatin binding;GO:0003690:double-stranded DNA binding;GO:0003700:sequence-spec…	K08530
ENSMUSG00000030562	124.12	2.37814	0.215858	11.0171	3.16e-28	1.36e-26	7	87246096	87398710	+	Nox4	NADPH oxidase 4 [Source:MGI Symbol%3BAcc:MGI:1354184]	GO:0000902:cell morphogenesis;GO:0001666:response to hypoxia;GO:0006801:superoxide metabolic process;GO:0007569:cell aging;GO:0008285:negative regulation of cell proliferation;GO:0010467:gene expression;GO:0014911:positive regulation of smooth muscle cell migration;GO:0042554:superoxide anion generation;GO:0043065:positive regulation of apoptotic process;GO:0043406:positive regulation of MAP kina…	GO:0001725:stress fiber;GO:0005634:nucleus;GO:0005739:mitochondrion;GO:0005789:endoplasmic reticulum membrane;GO:0005925:focal adhesion;GO:0016324:apical plasma membrane;GO:0043020:NADPH oxidase complex;GO:0048471:perinuclear region of cytoplasm;GO:0071944:cell periphery;	GO:0016174:NAD(P)H oxidase activity;GO:0016175:superoxide-generating NADPH oxidase activity;GO:0072341:modified amino acid binding;	-
ENSMUSG00000070605	45.0591	-5.08821	0.462105	-11.0109	3.38e-28	1.46e-26	4	146449023	146470292	+	Zfp992	zinc finger protein 992 [Source:MGI Symbol%3BAcc:MGI:3700963]	GO:0006355:regulation of transcription, DNA-templated;GO:0008150:biological_process;	GO:0005575:cellular_component;GO:0005622:intracellular;	GO:0003674:molecular_function;GO:0003676:nucleic acid binding;GO:0046872:metal ion binding;	-
ENSMUSG00000062393	46.7949	5.25586	0.477363	11.0102	3.41e-28	1.47e-26	X	6779306	6948363	+	Dgkk	diacylglycerol kinase kappa [Source:MGI Symbol%3BAcc:MGI:3580254]	GO:0006979:response to oxidative stress;GO:0007205:protein kinase C-activating G-protein coupled receptor signaling pathway;GO:0016310:phosphorylation;GO:0035556:intracellular signal transduction;GO:0046339:diacylglycerol metabolic process;	GO:0005622:intracellular;GO:0005886:plasma membrane;	GO:0003951:NAD+ kinase activity;GO:0004143:diacylglycerol kinase activity;GO:0005524:ATP binding;	K00901
ENSMUSG00000034807	3360.82	-1.02457	0.0930749	-11.008	3.5e-28	1.5e-26	8	71610998	71624911	+	Colgalt1	collagen beta(1-O)galactosyltransferase 1 [Source:MGI Symbol%3BAcc:MGI:1924348]	-	GO:0005788:endoplasmic reticulum lumen;GO:0016020:membrane;	GO:0003674:molecular_function;GO:0050211:procollagen galactosyltransferase activity;	K11703
ENSMUSG00000005148	770.639	-1.23274	0.112081	-10.9986	3.88e-28	1.66e-26	14	99298691	99313405	+	Klf5	Kruppel-like factor 5 [Source:MGI Symbol%3BAcc:MGI:1338056]	GO:0000122:negative regulation of transcription from RNA polymerase II promoter;GO:0001525:angiogenesis;GO:0006357:regulation of transcription from RNA polymerase II promoter;GO:0006366:transcription from RNA polymerase II promoter;GO:0008284:positive regulation of cell proliferation;GO:0030033:microvillus assembly;GO:0032534:regulation of microvillus assembly;GO:0035914:skeletal muscle cell diff…	GO:0005634:nucleus;GO:0005654:nucleoplasm;GO:0005794:Golgi apparatus;GO:0043231:intracellular membrane-bounded organelle;	GO:0000978:RNA polymerase II core promoter proximal region sequence-specific DNA binding;GO:0001077:RNA polymerase II core promoter proximal region sequence-specific DNA binding transcription factor activity involved in positive regulation of transcription;GO:0003677:DNA binding;GO:0003700:sequence-specific DNA binding transcription factor activity;GO:0005515:protein binding;GO:0008134:transcript…	K09206
ENSMUSG00000033096	593.027	-1.34667	0.122458	-10.997	3.95e-28	1.68e-26	2	150583080	150608567	-	Apmap	adipocyte plasma membrane associated protein [Source:MGI Symbol%3BAcc:MGI:1919131]	GO:0009058:biosynthetic process;	GO:0005783:endoplasmic reticulum;GO:0009986:cell surface;GO:0016020:membrane;GO:0016021:integral component of membrane;GO:0070062:extracellular exosome;	GO:0004064:arylesterase activity;GO:0016788:hydrolase activity, acting on ester bonds;GO:0016844:strictosidine synthase activity;	K21407
ENSMUSG00000029804	156.399	-2.41035	0.219244	-10.9939	4.09e-28	1.74e-26	6	58831465	58920398	+	Herc3	hect domain and RLD 3 [Source:MGI Symbol%3BAcc:MGI:1921248]	GO:0016567:protein ubiquitination;	GO:0005737:cytoplasm;GO:0005829:cytosol;	GO:0061630:ubiquitin protein ligase activity;	-
ENSMUSG00000031903	350.523	-1.40736	0.128137	-10.9832	4.6e-28	1.95e-26	8	106150399	106164715	+	Pla2g15	phospholipase A2%2C group XV [Source:MGI Symbol%3BAcc:MGI:2178076]	GO:0006631:fatty acid metabolic process;GO:0006650:glycerophospholipid metabolic process;GO:0006672:ceramide metabolic process;GO:0034638:phosphatidylcholine catabolic process;GO:0046338:phosphatidylethanolamine catabolic process;	GO:0005615:extracellular space;GO:0005654:nucleoplasm;GO:0005739:mitochondrion;GO:0005764:lysosome;GO:0016020:membrane;GO:0043231:intracellular membrane-bounded organelle;GO:0070062:extracellular exosome;	GO:0004622:lysophospholipase activity;GO:0008374:O-acyltransferase activity;GO:0047499:calcium-independent phospholipase A2 activity;	K06129
ENSMUSG00000009687	44.748	4.91858	0.448312	10.9713	5.25e-28	2.23e-26	7	31032722	31042481	-	Fxyd5	FXYD domain-containing ion transport regulator 5 [Source:MGI Symbol%3BAcc:MGI:1201785]	GO:0034220:ion transmembrane transport;GO:2000649:regulation of sodium ion transmembrane transporter activity;	GO:0005887:integral component of plasma membrane;GO:0016021:integral component of membrane;	GO:0003779:actin binding;GO:0005216:ion channel activity;GO:0017080:sodium channel regulator activity;GO:0045296:cadherin binding;	K13362
ENSMUSG00000031387	1056.75	1.52119	0.138718	10.9661	5.56e-28	2.35e-26	X	73922121	73930850	-	Renbp	renin binding protein [Source:MGI Symbol%3BAcc:MGI:105940]	GO:0006044:N-acetylglucosamine metabolic process;GO:0006051:N-acetylmannosamine metabolic process;GO:0010951:negative regulation of endopeptidase activity;GO:0019262:N-acetylneuraminate catabolic process;	GO:0070062:extracellular exosome;	GO:0004866:endopeptidase inhibitor activity;GO:0005524:ATP binding;GO:0042803:protein homodimerization activity;GO:0050121:N-acylglucosamine 2-epimerase activity;	K01787
ENSMUSG00000050148	2289.2	1.1122	0.101518	10.9557	6.24e-28	2.63e-26	X	153498227	153501570	+	Ubqln2	ubiquilin 2 [Source:MGI Symbol%3BAcc:MGI:1860283]	GO:0006914:autophagy;GO:0016241:regulation of macroautophagy;GO:0030433:ER-associated ubiquitin-dependent protein catabolic process;GO:1900186:negative regulation of clathrin-mediated endocytosis;GO:1903071:positive regulation of ER-associated ubiquitin-dependent protein catabolic process;GO:1904021:negative regulation of G-protein coupled receptor internalization;GO:2000785:regulation of autopha…	GO:0005634:nucleus;GO:0005737:cytoplasm;GO:0005776:autophagosome;GO:0005829:cytosol;GO:0005886:plasma membrane;GO:0031410:cytoplasmic vesicle;	GO:0005515:protein binding;	K04523
ENSMUSG00000031788	334.868	-1.54796	0.141308	-10.9545	6.32e-28	2.66e-26	8	95099828	95202812	-	Kifc3	kinesin family member C3 [Source:MGI Symbol%3BAcc:MGI:109202]	GO:0007017:microtubule-based process;GO:0007018:microtubule-based movement;GO:0007030:Golgi organization;GO:0045218:zonula adherens maintenance;GO:0090136:epithelial cell-cell adhesion;	GO:0005794:Golgi apparatus;GO:0005813:centrosome;GO:0005871:kinesin complex;GO:0005874:microtubule;GO:0005915:zonula adherens;GO:0030659:cytoplasmic vesicle membrane;GO:0070062:extracellular exosome;	GO:0005524:ATP binding;GO:0008017:microtubule binding;GO:0008569:ATP-dependent microtubule motor activity, minus-end-directed;	K10406
ENSMUSG00000063687	93.8339	-3.39926	0.310481	-10.9484	6.77e-28	2.84e-26	18	37320381	37323915	+	Pcdhb5	protocadherin beta 5 [Source:MGI Symbol%3BAcc:MGI:2136739]	GO:0007155:cell adhesion;GO:0007156:homophilic cell adhesion via plasma membrane adhesion molecules;GO:0007268:synaptic transmission;GO:0007416:synapse assembly;	GO:0005887:integral component of plasma membrane;	GO:0005509:calcium ion binding;	K16494
ENSMUSG00000026576	199.471	1.8285	0.167076	10.9441	7.09e-28	2.97e-26	1	164437109	164458355	-	Atp1b1	ATPase%2C Na+/K+ transporting%2C beta 1 polypeptide [Source:MGI Symbol%3BAcc:MGI:88108]	GO:0001666:response to hypoxia;GO:0006874:cellular calcium ion homeostasis;GO:0006883:cellular sodium ion homeostasis;GO:0007155:cell adhesion;GO:0010107:potassium ion import;GO:0010248:establishment or maintenance of transmembrane electrochemical gradient;GO:0010468:regulation of gene expression;GO:0010882:regulation of cardiac muscle contraction by calcium ion signaling;GO:0030007:cellular pota…	GO:0005622:intracellular;GO:0005886:plasma membrane;GO:0005890:sodium:potassium-exchanging ATPase complex;GO:0005901:caveola;GO:0014704:intercalated disc;GO:0016020:membrane;GO:0016323:basolateral plasma membrane;GO:0016324:apical plasma membrane;GO:0042383:sarcolemma;GO:0043209:myelin sheath;GO:0070062:extracellular exosome;GO:1903561:extracellular vesicle;	GO:0001671:ATPase activator activity;GO:0005391:sodium:potassium-exchanging ATPase activity;GO:0005515:protein binding;GO:0005524:ATP binding;GO:0008022:protein C-terminus binding;GO:0008144:drug binding;GO:0016887:ATPase activity;GO:0019901:protein kinase binding;GO:0023026:MHC class II protein complex binding;GO:0030955:potassium ion binding;GO:0031402:sodium ion binding;GO:0051117:ATPase bindi…	-
ENSMUSG00000046707	3153.74	-0.951985	0.0871121	-10.9283	8.44e-28	3.53e-26	8	95446096	95490039	-	Csnk2a2	casein kinase 2%2C alpha prime polypeptide [Source:MGI Symbol%3BAcc:MGI:88547]	GO:0006351:transcription, DNA-templated;GO:0006355:regulation of transcription, DNA-templated;GO:0006468:protein phosphorylation;GO:0006915:apoptotic process;GO:0007283:spermatogenesis;GO:0016055:Wnt signaling pathway;GO:0021987:cerebral cortex development;GO:0051726:regulation of cell cycle;GO:0071174:mitotic spindle checkpoint;GO:0097421:liver regeneration;GO:1903146:regulation of mitochondrion…	GO:0000785:chromatin;GO:0001669:acrosomal vesicle;GO:0005634:nucleus;GO:0005886:plasma membrane;GO:0005956:protein kinase CK2 complex;GO:0031519:PcG protein complex;	GO:0004674:protein serine/threonine kinase activity;GO:0005515:protein binding;GO:0005524:ATP binding;GO:0047485:protein N-terminus binding;	K03097
ENSMUSG00000031023	67.8174	-3.28205	0.300642	-10.9168	9.58e-28	4e-26	7	109703690	109712189	+	Akip1	A kinase (PRKA) interacting protein 1 [Source:MGI Symbol%3BAcc:MGI:3041226]	GO:0034446:substrate adhesion-dependent cell spreading;GO:1901222:regulation of NIK/NF-kappaB signaling;	GO:0005634:nucleus;GO:0005654:nucleoplasm;GO:0048471:perinuclear region of cytoplasm;	GO:0005515:protein binding;	-
ENSMUSG00000031290	846.905	1.13371	0.103881	10.9135	9.93e-28	4.14e-26	X	147470375	147554081	-	Lrch2	leucine-rich repeats and calponin homology (CH) domain containing 2 [Source:MGI Symbol%3BAcc:MGI:2147870]	GO:0007165:signal transduction;	GO:0005886:plasma membrane;	GO:0003674:molecular_function;	-
ENSMUSG00000045827	224.396	2.0023	0.183569	10.9076	1.06e-27	4.41e-26	13	33003250	33017957	+	Serpinb9	serine (or cysteine) peptidase inhibitor%2C clade B%2C member 9 [Source:MGI Symbol%3BAcc:MGI:106603]	GO:0001913:T cell mediated cytotoxicity;GO:0002438:acute inflammatory response to antigenic stimulus;GO:0006915:apoptotic process;GO:0006955:immune response;GO:0009617:response to bacterium;GO:0010628:positive regulation of gene expression;GO:0010951:negative regulation of endopeptidase activity;GO:0033668:negative regulation by symbiont of host apoptotic process;GO:0042270:protection from natura…	GO:0005615:extracellular space;GO:0005622:intracellular;GO:0005634:nucleus;GO:0005737:cytoplasm;GO:0005829:cytosol;GO:0016020:membrane;GO:0070062:extracellular exosome;	GO:0002020:protease binding;GO:0004867:serine-type endopeptidase inhibitor activity;GO:0005515:protein binding;GO:0043027:cysteine-type endopeptidase inhibitor activity involved in apoptotic process;	K13963
ENSMUSG00000021240	248.148	1.62315	0.14897	10.8958	1.21e-27	5.01e-26	12	84601464	84617413	-	Abcd4	ATP-binding cassette%2C sub-family D (ALD)%2C member 4 [Source:MGI Symbol%3BAcc:MGI:1349217]	GO:0009235:cobalamin metabolic process;GO:0055085:transmembrane transport;	GO:0005777:peroxisome;GO:0005789:endoplasmic reticulum membrane;GO:0016021:integral component of membrane;	GO:0005524:ATP binding;GO:0042626:ATPase activity, coupled to transmembrane movement of substances;	K05678
ENSMUSG00000035692	142.701	-3.51072	0.322406	-10.8891	1.3e-27	5.38e-26	4	156199424	156200818	-	Isg15	ISG15 ubiquitin-like modifier [Source:MGI Symbol%3BAcc:MGI:1855694]	GO:0019941:modification-dependent protein catabolic process;GO:0030501:positive regulation of bone mineralization;GO:0031397:negative regulation of protein ubiquitination;GO:0032020:ISG15-protein conjugation;GO:0032649:regulation of interferon-gamma production;GO:0034340:response to type I interferon;GO:0042742:defense response to bacterium;GO:0045071:negative regulation of viral genome replicati…	GO:0005576:extracellular region;GO:0005737:cytoplasm;	GO:0005515:protein binding;GO:0031386:protein tag;	K12159
ENSMUSG00000020057	274.565	-1.72078	0.158036	-10.8886	1.31e-27	5.4e-26	10	88322804	88379080	-	Dram1	DNA-damage regulated autophagy modulator 1 [Source:MGI Symbol%3BAcc:MGI:1918962]	GO:0006914:autophagy;GO:0006915:apoptotic process;GO:0010506:regulation of autophagy;	GO:0005737:cytoplasm;GO:0005764:lysosome;GO:0005765:lysosomal membrane;GO:0016021:integral component of membrane;	GO:0003674:molecular_function;	K21955
ENSMUSG00000014361	96.4334	2.50755	0.23056	10.8759	1.5e-27	6.19e-26	2	128698956	128802894	+	Mertk	c-mer proto-oncogene tyrosine kinase [Source:MGI Symbol%3BAcc:MGI:96965]	GO:0001779:natural killer cell differentiation;GO:0001818:negative regulation of cytokine production;GO:0006909:phagocytosis;GO:0007283:spermatogenesis;GO:0018108:peptidyl-tyrosine phosphorylation;GO:0030168:platelet activation;GO:0032940:secretion by cell;GO:0034446:substrate adhesion-dependent cell spreading;GO:0043277:apoptotic cell clearance;GO:0043491:protein kinase B signaling;GO:0050766:po…	GO:0001750:photoreceptor outer segment;GO:0005615:extracellular space;GO:0005737:cytoplasm;GO:0016021:integral component of membrane;GO:0016028:rhabdomere;	GO:0004714:transmembrane receptor protein tyrosine kinase activity;GO:0005524:ATP binding;	K05117
ENSMUSG00000041481	76.7671	2.91909	0.2686	10.8678	1.64e-27	6.75e-26	12	104236245	104241939	+	Serpina3g	serine (or cysteine) peptidase inhibitor%2C clade A%2C member 3G [Source:MGI Symbol%3BAcc:MGI:105046]	GO:0002250:adaptive immune response;GO:0006915:apoptotic process;GO:0010951:negative regulation of endopeptidase activity;GO:0034097:response to cytokine;GO:0043434:response to peptide hormone;	GO:0005615:extracellular space;GO:0005634:nucleus;GO:0005737:cytoplasm;	GO:0004867:serine-type endopeptidase inhibitor activity;GO:0004869:cysteine-type endopeptidase inhibitor activity;	-
ENSMUSG00000031751	4301.07	-0.802408	0.0740611	-10.8344	2.37e-27	9.71e-26	8	93971588	94012842	-	Amfr	autocrine motility factor receptor [Source:MGI Symbol%3BAcc:MGI:1345634]	GO:0000209:protein polyubiquitination;GO:0006511:ubiquitin-dependent protein catabolic process;GO:0007568:aging;GO:0007611:learning or memory;GO:0009987:cellular process;GO:0030433:ER-associated ubiquitin-dependent protein catabolic process;GO:0030968:endoplasmic reticulum unfolded protein response;GO:0032092:positive regulation of protein binding;GO:0042787:protein ubiquitination involved in ubi…	GO:0005634:nucleus;GO:0005783:endoplasmic reticulum;GO:0005789:endoplasmic reticulum membrane;GO:0005794:Golgi apparatus;GO:0005887:integral component of plasma membrane;GO:0016020:membrane;GO:0030176:integral component of endoplasmic reticulum membrane;GO:0030425:dendrite;GO:0030426:growth cone;GO:0043025:neuronal cell body;GO:0043234:protein complex;GO:0048471:perinuclear region of cytoplasm;	GO:0000166:nucleotide binding;GO:0004842:ubiquitin-protein transferase activity;GO:0004872:receptor activity;GO:0005515:protein binding;GO:0030674:protein binding, bridging;GO:0034450:ubiquitin-ubiquitin ligase activity;GO:0046872:metal ion binding;GO:0051087:chaperone binding;GO:0061630:ubiquitin protein ligase activity;GO:1904264:ubiquitin protein ligase activity involved in ERAD pathway;GO:199…	-
ENSMUSG00000049775	6861.34	2.37158	0.218964	10.8309	2.46e-27	1.01e-25	X	167207093	167209315	-	Tmsb4x	thymosin%2C beta 4%2C X chromosome [Source:MGI Symbol%3BAcc:MGI:99510]	GO:0007015:actin filament organization;GO:0014911:positive regulation of smooth muscle cell migration;GO:0030334:regulation of cell migration;GO:0045893:positive regulation of transcription, DNA-templated;GO:0051152:positive regulation of smooth muscle cell differentiation;	GO:0005615:extracellular space;GO:0005634:nucleus;GO:0005829:cytosol;GO:0005856:cytoskeleton;	GO:0003785:actin monomer binding;GO:0005515:protein binding;	K05764
ENSMUSG00000035283	44.5773	-4.63813	0.428318	-10.8287	2.52e-27	1.03e-25	19	56722372	56724862	+	Adrb1	adrenergic receptor%2C beta 1 [Source:MGI Symbol%3BAcc:MGI:87937]	GO:0001996:positive regulation of heart rate by epinephrine-norepinephrine;GO:0001997:positive regulation of the force of heart contraction by epinephrine-norepinephrine;GO:0002024:diet induced thermogenesis;GO:0002025:vasodilation by norepinephrine-epinephrine involved in regulation of systemic arterial blood pressure;GO:0007189:adenylate cyclase-activating G-protein coupled receptor signaling p…	GO:0005769:early endosome;GO:0005886:plasma membrane;GO:0005887:integral component of plasma membrane;GO:0016020:membrane;	GO:0004940:beta1-adrenergic receptor activity;GO:0005057:receptor signaling protein activity;GO:0005088:Ras guanyl-nucleotide exchange factor activity;GO:0005515:protein binding;GO:0030165:PDZ domain binding;GO:0031694:alpha-2A adrenergic receptor binding;GO:0046982:protein heterodimerization activity;GO:0051379:epinephrine binding;GO:0051380:norepinephrine binding;	K04141
ENSMUSG00000107962	460.656	1.9138	0.176754	10.8275	2.55e-27	1.04e-25	6	49254851	49256462	+	Gm43980	predicted gene%2C 43980 [Source:MGI Symbol%3BAcc:MGI:5690372]	-	-	-	-
ENSMUSG00000021010	80.2379	2.87587	0.265726	10.8227	2.69e-27	1.09e-25	12	53248677	54072175	+	Npas3	neuronal PAS domain protein 3 [Source:MGI Symbol%3BAcc:MGI:1351610]	GO:0001964:startle response;GO:0006351:transcription, DNA-templated;GO:0006357:regulation of transcription from RNA polymerase II promoter;GO:0007626:locomotory behavior;GO:0032502:developmental process;GO:0042711:maternal behavior;GO:0045893:positive regulation of transcription, DNA-templated;	GO:0005634:nucleus;GO:0005654:nucleoplasm;GO:0005730:nucleolus;GO:0005737:cytoplasm;GO:0005829:cytosol;	GO:0000981:sequence-specific DNA binding RNA polymerase II transcription factor activity;GO:0003677:DNA binding;GO:0005515:protein binding;GO:0046983:protein dimerization activity;	K09098
ENSMUSG00000037820	91.1065	2.63094	0.243126	10.8213	2.73e-27	1.11e-25	2	158116402	158146436	-	Tgm2	transglutaminase 2%2C C polypeptide [Source:MGI Symbol%3BAcc:MGI:98731]	GO:0001974:blood vessel remodeling;GO:0007186:G-protein coupled receptor signaling pathway;GO:0007200:phospholipase C-activating G-protein coupled receptor signaling pathway;GO:0018149:peptide cross-linking;GO:0018153:isopeptide cross-linking via N6-(L-isoglutamyl)-L-lysine;GO:0032471:negative regulation of endoplasmic reticulum calcium ion concentration;GO:0043065:positive regulation of apoptoti…	GO:0005578:proteinaceous extracellular matrix;GO:0005737:cytoplasm;GO:0005739:mitochondrion;GO:0005783:endoplasmic reticulum;GO:0005829:cytosol;GO:0005925:focal adhesion;GO:0016020:membrane;GO:0031012:extracellular matrix;GO:0031226:intrinsic component of plasma membrane;GO:0070062:extracellular exosome;	GO:0003810:protein-glutamine gamma-glutamyltransferase activity;GO:0005509:calcium ion binding;GO:0005525:GTP binding;GO:0008483:transaminase activity;GO:0019904:protein domain specific binding;	K05625
ENSMUSG00000040037	116.018	2.80974	0.25967	10.8204	2.75e-27	1.12e-25	3	156561794	157316445	+	Negr1	neuronal growth regulator 1 [Source:MGI Symbol%3BAcc:MGI:2444846]	GO:0007626:locomotory behavior;GO:0007631:feeding behavior;GO:0010976:positive regulation of neuron projection development;GO:0016337:single organismal cell-cell adhesion;	GO:0005886:plasma membrane;GO:0031225:anchored component of membrane;GO:0070062:extracellular exosome;	GO:0003674:molecular_function;	-
ENSMUSG00000041313	2183.94	-1.48988	0.137758	-10.8152	2.92e-27	1.18e-25	5	148327410	148399904	-	Slc7a1	solute carrier family 7 (cationic amino acid transporter%2C y+ system)%2C member 1 [Source:MGI Symbol%3BAcc:MGI:88117]	GO:0015809:arginine transport;GO:1903826:arginine transmembrane transport;	GO:0016020:membrane;GO:0016021:integral component of membrane;	GO:0015181:arginine transmembrane transporter activity;	-
ENSMUSG00000040990	2722.14	1.22897	0.113709	10.808	3.16e-27	1.27e-25	X	159627272	159978069	+	Sh3kbp1	SH3-domain kinase binding protein 1 [Source:MGI Symbol%3BAcc:MGI:1889583]	GO:0006897:endocytosis;GO:0006915:apoptotic process;GO:0007010:cytoskeleton organization;GO:0008360:regulation of cell shape;GO:0016477:cell migration;	GO:0005737:cytoplasm;GO:0005856:cytoskeleton;GO:0005911:cell-cell junction;GO:0005925:focal adhesion;GO:0030139:endocytic vesicle;GO:0030659:cytoplasmic vesicle membrane;GO:0043005:neuron projection;GO:0045202:synapse;	GO:0005515:protein binding;GO:0017124:SH3 domain binding;	K12470
ENSMUSG00000062345	117.784	-2.81928	0.261059	-10.7994	3.46e-27	1.39e-25	1	107511423	107535478	+	Serpinb2	serine (or cysteine) peptidase inhibitor%2C clade B%2C member 2 [Source:MGI Symbol%3BAcc:MGI:97609]	GO:0010951:negative regulation of endopeptidase activity;GO:0042060:wound healing;GO:0043066:negative regulation of apoptotic process;	GO:0005615:extracellular space;GO:0005737:cytoplasm;	GO:0004867:serine-type endopeptidase inhibitor activity;	K19821
ENSMUSG00000074874	44.502	5.18031	0.479874	10.7952	3.63e-27	1.46e-25	13	60895351	60897447	-	Ctla2b	cytotoxic T lymphocyte-associated protein 2 beta [Source:MGI Symbol%3BAcc:MGI:88555]	GO:0006508:proteolysis;GO:0010951:negative regulation of endopeptidase activity;	-	GO:0004869:cysteine-type endopeptidase inhibitor activity;GO:0005515:protein binding;GO:0008234:cysteine-type peptidase activity;	-
ENSMUSG00000034684	185.718	-1.84612	0.17119	-10.7841	4.09e-27	1.64e-25	9	107681500	107710475	-	Sema3f	sema domain%2C immunoglobulin domain (Ig)%2C short basic domain%2C secreted%2C (semaphorin) 3F [Source:MGI Symbol%3BAcc:MGI:1096347]	GO:0001755:neural crest cell migration;GO:0007411:axon guidance;GO:0021612:facial nerve structural organization;GO:0021637:trigeminal nerve structural organization;GO:0021675:nerve development;GO:0021785:branchiomotor neuron axon guidance;GO:0036486:ventral trunk neural crest cell migration;GO:0048843:negative regulation of axon extension involved in axon guidance;GO:0048846:axon extension involv…	GO:0005615:extracellular space;	GO:0038191:neuropilin binding;GO:0045499:chemorepellent activity;	K06840
ENSMUSG00000052396	45.4661	4.75613	0.441097	10.7825	4.16e-27	1.67e-25	7	99219084	99238619	-	Mogat2	monoacylglycerol O-acyltransferase 2 [Source:MGI Symbol%3BAcc:MGI:2663253]	GO:0006071:glycerol metabolic process;GO:0006629:lipid metabolic process;GO:0006651:diacylglycerol biosynthetic process;GO:0019432:triglyceride biosynthetic process;GO:0046462:monoacylglycerol metabolic process;GO:0050892:intestinal absorption;	GO:0005783:endoplasmic reticulum;GO:0005789:endoplasmic reticulum membrane;GO:0016021:integral component of membrane;	GO:0003846:2-acylglycerol O-acyltransferase activity;GO:0016407:acetyltransferase activity;	K14457
ENSMUSG00000070720	40.4683	-5.14922	0.478178	-10.7684	4.85e-27	1.94e-25	4	131921771	131923140	+	Tmem200b	transmembrane protein 200B [Source:MGI Symbol%3BAcc:MGI:3646343]	GO:0008150:biological_process;	GO:0005575:cellular_component;GO:0016021:integral component of membrane;	GO:0003674:molecular_function;	-
ENSMUSG00000018042	3364.99	0.791477	0.0735195	10.7655	5.01e-27	2e-25	15	83153494	83172592	-	Cyb5r3	cytochrome b5 reductase 3 [Source:MGI Symbol%3BAcc:MGI:94893]	GO:0006695:cholesterol biosynthetic process;GO:0055114:oxidation-reduction process;	GO:0005741:mitochondrial outer membrane;GO:0005743:mitochondrial inner membrane;GO:0005789:endoplasmic reticulum membrane;GO:0005811:lipid particle;GO:0070062:extracellular exosome;	GO:0004128:cytochrome-b5 reductase activity, acting on NAD(P)H;GO:0005515:protein binding;GO:0016208:AMP binding;GO:0016491:oxidoreductase activity;GO:0043531:ADP binding;GO:0050660:flavin adenine dinucleotide binding;GO:0051287:NAD binding;	-
ENSMUSG00000050953	961.897	1.01832	0.094657	10.758	5.43e-27	2.16e-25	10	56377330	56402513	+	Gja1	gap junction protein%2C alpha 1 [Source:MGI Symbol%3BAcc:MGI:95713]	GO:0001649:osteoblast differentiation;GO:0001701:in utero embryonic development;GO:0001764:neuron migration;GO:0001947:heart looping;GO:0002070:epithelial cell maturation;GO:0002088:lens development in camera-type eye;GO:0003294:atrial ventricular junction remodeling;GO:0003347:epicardial cell to mesenchymal cell transition;GO:0007165:signal transduction;GO:0007267:cell-cell signaling;GO:0007507:…	GO:0005737:cytoplasm;GO:0005739:mitochondrion;GO:0005783:endoplasmic reticulum;GO:0005794:Golgi apparatus;GO:0005829:cytosol;GO:0005882:intermediate filament;GO:0005886:plasma membrane;GO:0005911:cell-cell junction;GO:0005916:fascia adherens;GO:0005921:gap junction;GO:0005922:connexon complex;GO:0005925:focal adhesion;GO:0014704:intercalated disc;GO:0016020:membrane;GO:0016021:integral component …	GO:0004871:signal transducer activity;GO:0005102:receptor binding;GO:0005243:gap junction channel activity;GO:0005515:protein binding;GO:0015075:ion transmembrane transporter activity;GO:0048487:beta-tubulin binding;GO:0086075:gap junction channel activity involved in cardiac conduction electrical coupling;GO:0097110:scaffold protein binding;GO:1903763:gap junction channel activity involved in ce…	K07372
ENSMUSG00000031568	1373.13	-1.29316	0.120273	-10.7518	5.81e-27	2.31e-25	8	47533664	47552955	+	Rwdd4a	RWD domain containing 4A [Source:MGI Symbol%3BAcc:MGI:2681000]	-	-	-	-
ENSMUSG00000097391	225.529	2.32253	0.216116	10.7467	6.14e-27	2.43e-25	12	109729764	109749460	+	Mirg	miRNA containing gene [Source:MGI Symbol%3BAcc:MGI:3781106]	-	-	-	-
ENSMUSG00000060224	47.5767	4.24158	0.39473	10.7455	6.22e-27	2.46e-25	19	42725858	42752775	-	Pyroxd2	pyridine nucleotide-disulphide oxidoreductase domain 2 [Source:MGI Symbol%3BAcc:MGI:1921830]	GO:0055114:oxidation-reduction process;	GO:0005622:intracellular;	GO:0016491:oxidoreductase activity;	-
ENSMUSG00000027479	5867.74	-0.791719	0.0737367	-10.7371	6.81e-27	2.69e-25	2	153741274	153773310	+	Mapre1	microtubule-associated protein%2C RP/EB family%2C member 1 [Source:MGI Symbol%3BAcc:MGI:891995]	GO:0007049:cell cycle;GO:0031115:negative regulation of microtubule polymerization;GO:0035372:protein localization to microtubule;GO:0051301:cell division;GO:1903033:positive regulation of microtubule plus-end binding;	GO:0005794:Golgi apparatus;GO:0005813:centrosome;GO:0005819:spindle;GO:0005874:microtubule;GO:0005881:cytoplasmic microtubule;GO:0015630:microtubule cytoskeleton;GO:0030981:cortical microtubule cytoskeleton;GO:0031253:cell projection membrane;GO:0035371:microtubule plus-end;GO:0042995:cell projection;	GO:0003723:RNA binding;GO:0005515:protein binding;GO:0042802:identical protein binding;GO:0045296:cadherin binding;GO:0051010:microtubule plus-end binding;	K10436
ENSMUSG00000031774	1540.21	-1.04814	0.097675	-10.7309	7.29e-27	2.87e-25	8	94574138	94601997	-	Fam192a	family with sequence similarity 192%2C member A [Source:MGI Symbol%3BAcc:MGI:1919637]	GO:0008150:biological_process;	GO:0005634:nucleus;	GO:0003674:molecular_function;	-
ENSMUSG00000031823	868.423	-1.11132	0.103567	-10.7305	7.32e-27	2.87e-25	8	120080890	120101482	-	Zdhhc7	zinc finger%2C DHHC domain containing 7 [Source:MGI Symbol%3BAcc:MGI:2142662]	GO:0018230:peptidyl-L-cysteine S-palmitoylation;GO:0018345:protein palmitoylation;	GO:0000139:Golgi membrane;GO:0005794:Golgi apparatus;GO:0016021:integral component of membrane;	GO:0016409:palmitoyltransferase activity;GO:0019706:protein-cysteine S-palmitoyltransferase activity;	K20029;K20028
ENSMUSG00000032763	591.471	1.15598	0.107856	10.7178	8.4e-27	3.29e-25	10	78574346	78584502	+	Ilvbl	ilvB (bacterial acetolactate synthase)-like [Source:MGI Symbol%3BAcc:MGI:1351911]	GO:0008150:biological_process;	GO:0016020:membrane;GO:0016021:integral component of membrane;	GO:0000287:magnesium ion binding;GO:0016740:transferase activity;GO:0030976:thiamine pyrophosphate binding;	K11259;K01652
ENSMUSG00000015189	575.591	-1.28662	0.120046	-10.7177	8.4e-27	3.29e-25	6	4600839	4643355	+	Casd1	CAS1 domain containing 1 [Source:MGI Symbol%3BAcc:MGI:2384865]	GO:0005975:carbohydrate metabolic process;	GO:0030173:integral component of Golgi membrane;	GO:0005515:protein binding;GO:0047186:N-acetylneuraminate 7-O(or 9-O)-acetyltransferase activity;	-
ENSMUSG00000031447	23995.5	-1.05129	0.0980981	-10.7168	8.49e-27	3.32e-25	8	13159161	13175338	+	Lamp1	lysosomal-associated membrane protein 1 [Source:MGI Symbol%3BAcc:MGI:96745]	GO:0007283:spermatogenesis;GO:0008626:granzyme-mediated apoptotic signaling pathway;GO:0043323:positive regulation of natural killer cell degranulation;GO:0045954:positive regulation of natural killer cell mediated cytotoxicity;GO:0048102:autophagic cell death;GO:0050821:protein stabilization;GO:0072594:establishment of protein localization to organelle;GO:0090160:Golgi to lysosome transport;GO:1…	GO:0005737:cytoplasm;GO:0005764:lysosome;GO:0005768:endosome;GO:0005770:late endosome;GO:0005771:multivesicular body;GO:0005829:cytosol;GO:0005886:plasma membrane;GO:0008021:synaptic vesicle;GO:0009897:external side of plasma membrane;GO:0009986:cell surface;GO:0010008:endosome membrane;GO:0016020:membrane;GO:0016021:integral component of membrane;GO:0030425:dendrite;GO:0031982:vesicle;GO:0042383…	GO:0005515:protein binding;GO:0019899:enzyme binding;GO:0019904:protein domain specific binding;	K06528
ENSMUSG00000050379	346.238	1.83862	0.171657	10.7111	9.03e-27	3.52e-25	X	36911326	36991794	-	2026-09-06	septin 6 [Source:MGI Symbol%3BAcc:MGI:1888939]	GO:0007049:cell cycle;GO:0007283:spermatogenesis;GO:0030154:cell differentiation;GO:0051301:cell division;	GO:0000777:condensed chromosome kinetochore;GO:0005819:spindle;GO:0005940:septin ring;GO:0008021:synaptic vesicle;GO:0030496:midbody;GO:0031105:septin complex;GO:0032154:cleavage furrow;GO:0032173:septin collar;GO:0043679:axon terminus;GO:0097227:sperm annulus;	GO:0005515:protein binding;GO:0005525:GTP binding;	K16939
ENSMUSG00000022453	950.398	1.06458	0.0995504	10.6938	1.09e-26	4.23e-25	15	82329532	82338826	-	Naga	N-acetyl galactosaminidase%2C alpha [Source:MGI Symbol%3BAcc:MGI:1261422]	GO:0009311:oligosaccharide metabolic process;GO:0016052:carbohydrate catabolic process;GO:0016139:glycoside catabolic process;GO:0019377:glycolipid catabolic process;GO:0046477:glycosylceramide catabolic process;	GO:0005737:cytoplasm;GO:0005764:lysosome;GO:0070062:extracellular exosome;	GO:0004557:alpha-galactosidase activity;GO:0008456:alpha-N-acetylgalactosaminidase activity;GO:0042803:protein homodimerization activity;	K01204
ENSMUSG00000031513	2452.44	-1.42608	0.133376	-10.6922	1.11e-26	4.3e-25	8	34135572	34147033	-	Leprotl1	leptin receptor overlapping transcript-like 1 [Source:MGI Symbol%3BAcc:MGI:1915442]	GO:0032511:late endosome to vacuole transport via multivesicular body sorting pathway;GO:2000009:negative regulation of protein localization to cell surface;	GO:0005768:endosome;GO:0016021:integral component of membrane;	GO:0003674:molecular_function;	-
ENSMUSG00000032009	979.88	1.47658	0.138252	10.6803	1.26e-26	4.87e-25	9	14275067	14333101	+	Sesn3	sestrin 3 [Source:MGI Symbol%3BAcc:MGI:1922997]	GO:0032868:response to insulin;GO:0034198:cellular response to amino acid starvation;GO:0038203:TORC2 signaling;GO:0042149:cellular response to glucose starvation;GO:0042593:glucose homeostasis;GO:0046626:regulation of insulin receptor signaling pathway;GO:0051896:regulation of protein kinase B signaling;GO:0055114:oxidation-reduction process;GO:0071230:cellular response to amino acid stimulus;GO…	GO:0005634:nucleus;GO:0005737:cytoplasm;GO:0031932:TORC2 complex;GO:0061700:GATOR2 complex;	GO:0005515:protein binding;GO:0016491:oxidoreductase activity;	K10141
ENSMUSG00000038332	544.112	1.35278	0.126712	10.676	1.32e-26	5.09e-25	10	41809935	41908424	+	Sesn1	sestrin 1 [Source:MGI Symbol%3BAcc:MGI:2155278]	GO:0030308:negative regulation of cell growth;GO:0034198:cellular response to amino acid starvation;GO:0042149:cellular response to glucose starvation;GO:0051896:regulation of protein kinase B signaling;GO:0055114:oxidation-reduction process;GO:0071230:cellular response to amino acid stimulus;GO:0072593:reactive oxygen species metabolic process;GO:1901031:regulation of response to reactive oxygen…	GO:0001650:fibrillar center;GO:0005634:nucleus;GO:0005737:cytoplasm;GO:0061700:GATOR2 complex;	GO:0005515:protein binding;GO:0051920:peroxiredoxin activity;GO:0070728:leucine binding;	K10141
ENSMUSG00000038416	2562.81	-0.884786	0.0831656	-10.6388	1.97e-26	7.58e-25	8	13757676	13781938	+	Cdc16	CDC16 cell division cycle 16 [Source:MGI Symbol%3BAcc:MGI:1917207]	GO:0007049:cell cycle;GO:0051301:cell division;GO:0070979:protein K11-linked ubiquitination;	GO:0005634:nucleus;GO:0005680:anaphase-promoting complex;GO:0005737:cytoplasm;GO:0005813:centrosome;GO:0005876:spindle microtubule;	GO:0005515:protein binding;	K03353
ENSMUSG00000038295	52.5479	3.54818	0.333714	10.6324	2.11e-26	8.11e-25	5	24384181	24392143	-	Atg9b	autophagy related 9B [Source:MGI Symbol%3BAcc:MGI:2685420]	GO:0000045:autophagosome assembly;GO:0000422:mitochondrion degradation;GO:0034497:protein localization to pre-autophagosomal structure;GO:0044805:late nucleophagy;	GO:0000407:pre-autophagosomal structure;GO:0000421:autophagosome membrane;GO:0005737:cytoplasm;GO:0005776:autophagosome;GO:0016021:integral component of membrane;GO:0031410:cytoplasmic vesicle;	GO:0003674:molecular_function;	K17907
ENSMUSG00000044641	256.583	-1.59775	0.150429	-10.6213	2.37e-26	9.11e-25	2	168081004	168101203	+	Pard6b	par-6 family cell polarity regulator beta [Source:MGI Symbol%3BAcc:MGI:2135605]	GO:0006461:protein complex assembly;GO:0007043:cell-cell junction assembly;GO:0007049:cell cycle;GO:0007163:establishment or maintenance of cell polarity;GO:0051301:cell division;	GO:0005634:nucleus;GO:0005829:cytosol;GO:0005886:plasma membrane;GO:0005923:bicellular tight junction;GO:0005938:cell cortex;GO:0016324:apical plasma membrane;GO:0043234:protein complex;GO:0045177:apical part of cell;GO:0070062:extracellular exosome;	GO:0005515:protein binding;	K06093
ENSMUSG00000024299	460.709	1.42794	0.134507	10.6161	2.51e-26	9.62e-25	17	33524204	33553782	+	Adamts10	a disintegrin-like and metallopeptidase (reprolysin type) with thrombospondin type 1 motif%2C 10 [Source:MGI Symbol%3BAcc:MGI:2449112]	GO:0006508:proteolysis;	GO:0001527:microfibril;GO:0005578:proteinaceous extracellular matrix;GO:0031012:extracellular matrix;	GO:0004222:metalloendopeptidase activity;GO:0008270:zinc ion binding;	-
ENSMUSG00000010154	321.542	-1.57653	0.148742	-10.5991	3.01e-26	1.15e-24	8	123332713	123369515	+	Spire2	spire homolog 2 (Drosophila) [Source:MGI Symbol%3BAcc:MGI:2446256]	GO:0015031:protein transport;GO:0016192:vesicle-mediated transport;GO:0030036:actin cytoskeleton organization;GO:0036089:cleavage furrow formation;GO:0040038:polar body extrusion after meiotic divisions;GO:0045010:actin nucleation;GO:0046907:intracellular transport;GO:0051295:establishment of meiotic spindle localization;GO:0070649:formin-nucleated actin cable assembly;	GO:0005829:cytosol;GO:0005856:cytoskeleton;GO:0005886:plasma membrane;GO:0005938:cell cortex;GO:0030659:cytoplasmic vesicle membrane;GO:0032154:cleavage furrow;GO:0048471:perinuclear region of cytoplasm;	GO:0003674:molecular_function;GO:0003779:actin binding;	K02098
ENSMUSG00000026664	280.309	-1.95697	0.184685	-10.5962	3.1e-26	1.18e-24	2	4919019	4938730	+	Phyh	phytanoyl-CoA hydroxylase [Source:MGI Symbol%3BAcc:MGI:891978]	GO:0001561:fatty acid alpha-oxidation;GO:0006103:2-oxoglutarate metabolic process;GO:0006720:isoprenoid metabolic process;GO:0097089:methyl-branched fatty acid metabolic process;	GO:0005739:mitochondrion;GO:0005777:peroxisome;	GO:0003824:catalytic activity;GO:0005515:protein binding;GO:0008198:ferrous iron binding;GO:0031406:carboxylic acid binding;GO:0031418:L-ascorbic acid binding;GO:0048037:cofactor binding;GO:0048244:phytanoyl-CoA dioxygenase activity;	K00477
ENSMUSG00000059878	93.6478	-2.52459	0.238285	-10.5949	3.15e-26	1.2e-24	6	116624016	116628999	-	Zfp422	zinc finger protein 422 [Source:MGI Symbol%3BAcc:MGI:1914505]	-	-	-	-
ENSMUSG00000067928	80.6135	2.63029	0.248437	10.5874	3.41e-26	1.3e-24	17	21707741	21725636	+	Zfp760	zinc finger protein 760 [Source:MGI Symbol%3BAcc:MGI:2679257]	GO:0006355:regulation of transcription, DNA-templated;	GO:0005575:cellular_component;GO:0005622:intracellular;	GO:0003676:nucleic acid binding;GO:0003700:sequence-specific DNA binding transcription factor activity;GO:0046872:metal ion binding;	K09228
ENSMUSG00000029810	2311.8	-1.40921	0.133138	-10.5846	3.51e-26	1.33e-24	6	48833818	48841496	-	Tmem176b	transmembrane protein 176B [Source:MGI Symbol%3BAcc:MGI:1916348]	GO:0030154:cell differentiation;GO:2001199:negative regulation of dendritic cell differentiation;	GO:0016021:integral component of membrane;GO:0031965:nuclear membrane;	GO:0005515:protein binding;	-
ENSMUSG00000031885	4854.79	-0.914036	0.0864436	-10.5738	3.94e-26	1.49e-24	8	105170674	105217989	+	Cbfb	core binding factor beta [Source:MGI Symbol%3BAcc:MGI:99851]	GO:0000209:protein polyubiquitination;GO:0001503:ossification;GO:0001649:osteoblast differentiation;GO:0030098:lymphocyte differentiation;GO:0030099:myeloid cell differentiation;GO:0045944:positive regulation of transcription from RNA polymerase II promoter;GO:0048469:cell maturation;GO:0060216:definitive hemopoiesis;	GO:0005634:nucleus;GO:0005654:nucleoplasm;GO:0016020:membrane;GO:0043234:protein complex;	GO:0003677:DNA binding;GO:0003713:transcription coactivator activity;GO:0005515:protein binding;	-
ENSMUSG00000020303	313.988	-1.45683	0.13785	-10.5682	4.18e-26	1.58e-24	11	31357307	31370074	-	Stc2	stanniocalcin 2 [Source:MGI Symbol%3BAcc:MGI:1316731]	GO:0006874:cellular calcium ion homeostasis;GO:0006979:response to oxidative stress;GO:0007566:embryo implantation;GO:0010629:negative regulation of gene expression;GO:0030968:endoplasmic reticulum unfolded protein response;GO:0033280:response to vitamin D;GO:0034976:response to endoplasmic reticulum stress;GO:0040015:negative regulation of multicellular organism growth;GO:0043434:response to pep…	GO:0005576:extracellular region;GO:0005615:extracellular space;GO:0005783:endoplasmic reticulum;GO:0005794:Golgi apparatus;GO:0048471:perinuclear region of cytoplasm;	GO:0005179:hormone activity;GO:0005515:protein binding;GO:0019899:enzyme binding;GO:0020037:heme binding;GO:0042803:protein homodimerization activity;	-
ENSMUSG00000031930	1395.02	-1.06087	0.100476	-10.5584	4.65e-26	1.75e-24	8	107436365	107558595	+	Wwp2	WW domain containing E3 ubiquitin protein ligase 2 [Source:MGI Symbol%3BAcc:MGI:1914144]	GO:0000122:negative regulation of transcription from RNA polymerase II promoter;GO:0006366:transcription from RNA polymerase II promoter;GO:0010629:negative regulation of gene expression;GO:0016567:protein ubiquitination;GO:0032410:negative regulation of transporter activity;GO:0034765:regulation of ion transmembrane transport;GO:0042391:regulation of membrane potential;GO:0042787:protein ubiquit…	GO:0005634:nucleus;GO:0005737:cytoplasm;GO:0016020:membrane;GO:0070062:extracellular exosome;	GO:0001085:RNA polymerase II transcription factor binding;GO:0001190:RNA polymerase II transcription factor binding transcription factor activity involved in positive regulation of transcription;GO:0004842:ubiquitin-protein transferase activity;GO:0005515:protein binding;GO:0008134:transcription factor binding;GO:0061630:ubiquitin protein ligase activity;	K05630;K05633;K10592
ENSMUSG00000031812	6233.21	-1.25228	0.118629	-10.5563	4.75e-26	1.79e-24	8	121590361	121598760	+	Map1lc3b	microtubule-associated protein 1 light chain 3 beta [Source:MGI Symbol%3BAcc:MGI:1914693]	GO:0000045:autophagosome assembly;GO:0000422:mitochondrion degradation;GO:0006914:autophagy;GO:0006995:cellular response to nitrogen starvation;GO:0070257:positive regulation of mucus secretion;	GO:0000421:autophagosome membrane;GO:0005622:intracellular;GO:0005739:mitochondrion;GO:0005776:autophagosome;GO:0005829:cytosol;GO:0005874:microtubule;GO:0005930:axoneme;GO:0012505:endomembrane system;GO:0016020:membrane;GO:0031410:cytoplasmic vesicle;GO:0044754:autolysosome;	GO:0005515:protein binding;GO:0031625:ubiquitin protein ligase binding;	-
ENSMUSG00000015312	1348.63	1.22148	0.115734	10.5542	4.86e-26	1.83e-24	10	80930073	80932204	+	Gadd45b	growth arrest and DNA-damage-inducible 45 beta [Source:MGI Symbol%3BAcc:MGI:107776]	GO:0000185:activation of MAPKKK activity;GO:0000186:activation of MAPKK activity;GO:0006469:negative regulation of protein kinase activity;GO:0006915:apoptotic process;GO:0006950:response to stress;GO:0007275:multicellular organismal development;GO:0030154:cell differentiation;GO:0043065:positive regulation of apoptotic process;GO:0046330:positive regulation of JNK cascade;GO:0051726:regulation o…	GO:0005634:nucleus;GO:0005737:cytoplasm;	GO:0005515:protein binding;	K04402
ENSMUSG00000070867	43.7782	4.5684	0.433053	10.5493	5.12e-26	1.92e-24	4	114406724	114615098	+	Trabd2b	TraB domain containing 2B [Source:MGI Symbol%3BAcc:MGI:3650152]	GO:0006508:proteolysis;GO:0016055:Wnt signaling pathway;GO:0030178:negative regulation of Wnt signaling pathway;GO:0032461:positive regulation of protein oligomerization;	GO:0005887:integral component of plasma membrane;GO:0031301:integral component of organelle membrane;GO:0070062:extracellular exosome;	GO:0004222:metalloendopeptidase activity;GO:0017147:Wnt-protein binding;GO:0046872:metal ion binding;	-
ENSMUSG00000020901	43.9037	4.82256	0.457385	10.5438	5.43e-26	2.03e-24	11	68432121	68497849	+	Pik3r5	phosphoinositide-3-kinase%2C regulatory subunit 5%2C p101 [Source:MGI Symbol%3BAcc:MGI:2443588]	GO:0007186:G-protein coupled receptor signaling pathway;GO:0014065:phosphatidylinositol 3-kinase signaling;GO:0043406:positive regulation of MAP kinase activity;GO:0043551:regulation of phosphatidylinositol 3-kinase activity;GO:0051897:positive regulation of protein kinase B signaling;	GO:0005634:nucleus;GO:0005737:cytoplasm;GO:0005815:microtubule organizing center;GO:0005829:cytosol;GO:0005886:plasma membrane;GO:0005942:phosphatidylinositol 3-kinase complex;GO:0005944:phosphatidylinositol 3-kinase complex, class IB;GO:0016020:membrane;	GO:0031683:G-protein beta/gamma-subunit complex binding;GO:0046935:1-phosphatidylinositol-3-kinase regulator activity;	K21290
ENSMUSG00000037999	45.8744	4.70988	0.446957	10.5377	5.79e-26	2.17e-24	5	62602445	62766159	-	Arap2	ArfGAP with RhoGAP domain%2C ankyrin repeat and PH domain 2 [Source:MGI Symbol%3BAcc:MGI:2684416]	GO:0007165:signal transduction;GO:0043547:positive regulation of GTPase activity;	GO:0005737:cytoplasm;	GO:0005096:GTPase activator activity;GO:0005547:phosphatidylinositol-3,4,5-trisphosphate binding;GO:0046872:metal ion binding;	K18440
ENSMUSG00000038482	4519.42	-0.988764	0.0938617	-10.5343	6.01e-26	2.24e-24	8	13338751	13378448	+	Tfdp1	transcription factor Dp 1 [Source:MGI Symbol%3BAcc:MGI:101934]	GO:0000083:regulation of transcription involved in G1/S transition of mitotic cell cycle;GO:0006355:regulation of transcription, DNA-templated;GO:0006366:transcription from RNA polymerase II promoter;GO:0008544:epidermis development;GO:0043276:anoikis;GO:0045893:positive regulation of transcription, DNA-templated;GO:0045944:positive regulation of transcription from RNA polymerase II promoter;GO:0…	GO:0005634:nucleus;GO:0005654:nucleoplasm;GO:0005667:transcription factor complex;GO:0005737:cytoplasm;GO:0005829:cytosol;GO:0090575:RNA polymerase II transcription factor complex;	GO:0000977:RNA polymerase II regulatory region sequence-specific DNA binding;GO:0000981:sequence-specific DNA binding RNA polymerase II transcription factor activity;GO:0001228:RNA polymerase II transcription regulatory region sequence-specific DNA binding transcription factor activity involved in positive regulation of transcription;GO:0003677:DNA binding;GO:0003700:sequence-specific DNA binding…	K04683
ENSMUSG00000002688	164.348	1.87817	0.178312	10.5331	6.08e-26	2.26e-24	12	50341231	50649098	-	Prkd1	protein kinase D1 [Source:MGI Symbol%3BAcc:MGI:99879]	GO:0001525:angiogenesis;GO:0001938:positive regulation of endothelial cell proliferation;GO:0006468:protein phosphorylation;GO:0006915:apoptotic process;GO:0006954:inflammatory response;GO:0007030:Golgi organization;GO:0007265:Ras protein signal transduction;GO:0010508:positive regulation of autophagy;GO:0010595:positive regulation of endothelial cell migration;GO:0010837:regulation of keratinocy…	GO:0000421:autophagosome membrane;GO:0005634:nucleus;GO:0005737:cytoplasm;GO:0005794:Golgi apparatus;GO:0005802:trans-Golgi network;GO:0005829:cytosol;GO:0005886:plasma membrane;GO:0005911:cell-cell junction;GO:0005938:cell cortex;	GO:0004674:protein serine/threonine kinase activity;GO:0004697:protein kinase C activity;GO:0005515:protein binding;GO:0005524:ATP binding;GO:0016301:kinase activity;GO:0042802:identical protein binding;GO:0046872:metal ion binding;	K06070
ENSMUSG00000029084	39.4123	5.06885	0.481496	10.5273	6.47e-26	2.4e-24	5	43868553	43912375	+	Cd38	CD38 antigen [Source:MGI Symbol%3BAcc:MGI:107474]	GO:0001666:response to hypoxia;GO:0007204:positive regulation of cytosolic calcium ion concentration;GO:0007565:female pregnancy;GO:0030307:positive regulation of cell growth;GO:0030890:positive regulation of B cell proliferation;GO:0032024:positive regulation of insulin secretion;GO:0032355:response to estradiol;GO:0032526:response to retinoic acid;GO:0032570:response to progesterone;GO:0033194:…	GO:0005634:nucleus;GO:0005886:plasma membrane;GO:0009986:cell surface;GO:0016020:membrane;GO:0016021:integral component of membrane;GO:0070062:extracellular exosome;	GO:0003953:NAD+ nucleosidase activity;GO:0016740:transferase activity;GO:0016798:hydrolase activity, acting on glycosyl bonds;GO:0016849:phosphorus-oxygen lyase activity;GO:0050135:NAD(P)+ nucleosidase activity;	K01242
ENSMUSG00000022367	94.8258	2.37447	0.225607	10.5248	6.64e-26	2.46e-24	15	56665627	56694539	-	Has2	hyaluronan synthase 2 [Source:MGI Symbol%3BAcc:MGI:107821]	GO:0001570:vasculogenesis;GO:0001822:kidney development;GO:0007155:cell adhesion;GO:0008284:positive regulation of cell proliferation;GO:0010838:positive regulation of keratinocyte proliferation;GO:0014911:positive regulation of smooth muscle cell migration;GO:0030212:hyaluronan metabolic process;GO:0030213:hyaluronan biosynthetic process;GO:0030335:positive regulation of cell migration;GO:003581…	GO:0005737:cytoplasm;GO:0005887:integral component of plasma membrane;	GO:0050501:hyaluronan synthase activity;	K00752
ENSMUSG00000028557	2825.24	-1.2127	0.1153	-10.5178	7.15e-26	2.65e-24	4	109451098	109484728	-	Rnf11	ring finger protein 11 [Source:MGI Symbol%3BAcc:MGI:1352759]	GO:0006511:ubiquitin-dependent protein catabolic process;GO:0042787:protein ubiquitination involved in ubiquitin-dependent protein catabolic process;GO:0043161:proteasome-mediated ubiquitin-dependent protein catabolic process;GO:0051865:protein autoubiquitination;	GO:0000151:ubiquitin ligase complex;GO:0005634:nucleus;GO:0005769:early endosome;GO:0055037:recycling endosome;GO:0070062:extracellular exosome;	GO:0004842:ubiquitin-protein transferase activity;GO:0005515:protein binding;GO:0046872:metal ion binding;GO:0061630:ubiquitin protein ligase activity;	K11980
ENSMUSG00000109903	56.8516	-3.62673	0.344829	-10.5175	7.18e-26	2.65e-24	5	16791810	16882052	+	AC158589.1	-	-	-	-	-
ENSMUSG00000020019	59.7429	3.0991	0.294779	10.5133	7.5e-26	2.77e-24	10	93640681	93747207	+	Ntn4	netrin 4 [Source:MGI Symbol%3BAcc:MGI:1888978]	GO:0016322:neuron remodeling;GO:0030198:extracellular matrix organization;GO:0060668:regulation of branching involved in salivary gland morphogenesis by extracellular matrix-epithelial cell signaling;	GO:0005604:basement membrane;GO:0005886:plasma membrane;	GO:0043237:laminin-1 binding;	K06845
ENSMUSG00000008167	705.484	-1.38279	0.131543	-10.512	7.6e-26	2.8e-24	8	85060055	85067124	+	Fbxw9	F-box and WD-40 domain protein 9 [Source:MGI Symbol%3BAcc:MGI:1915878]	GO:0016567:protein ubiquitination;	GO:0005575:cellular_component;	GO:0004842:ubiquitin-protein transferase activity;	K10265
ENSMUSG00000040174	412.112	1.37397	0.130769	10.5069	8.03e-26	2.95e-24	2	93980550	94010807	-	Alkbh3	alkB homolog 3%2C alpha-ketoglutarate-dependent dioxygenase [Source:MGI Symbol%3BAcc:MGI:1916363]	GO:0006281:DNA repair;GO:0006307:DNA dealkylation involved in DNA repair;GO:0008283:cell proliferation;GO:0035552:oxidative single-stranded DNA demethylation;GO:0035553:oxidative single-stranded RNA demethylation;	GO:0005634:nucleus;GO:0005654:nucleoplasm;GO:0005739:mitochondrion;GO:0005829:cytosol;	GO:0004519:endonuclease activity;GO:0004527:exonuclease activity;GO:0008198:ferrous iron binding;GO:0016706:oxidoreductase activity, acting on paired donors, with incorporation or reduction of molecular oxygen, 2-oxoglutarate as one donor, and incorporation of one atom each of oxygen into both donors;GO:0043734:DNA-N1-methyladenine dioxygenase activity;GO:0051747:cytosine C-5 DNA demethylase acti…	K10860
ENSMUSG00000046314	44.4417	4.35079	0.414157	10.5052	8.18e-26	2.99e-24	12	44852484	45074709	-	Stxbp6	syntaxin binding protein 6 (amisyn) [Source:MGI Symbol%3BAcc:MGI:2384963]	GO:0006887:exocytosis;GO:0006893:Golgi to plasma membrane transport;GO:0035542:regulation of SNARE complex assembly;GO:0051601:exocyst localization;GO:0098609:cell-cell adhesion;	GO:0000145:exocyst;GO:0005886:plasma membrane;GO:0005913:cell-cell adherens junction;GO:0016021:integral component of membrane;	GO:0005546:phosphatidylinositol-4,5-bisphosphate binding;GO:0017049:GTP-Rho binding;GO:0098641:cadherin binding involved in cell-cell adhesion;	K08519
ENSMUSG00000046546	226.286	1.70207	0.162023	10.5051	8.18e-26	2.99e-24	16	30599723	30602797	+	Fam43a	family with sequence similarity 43%2C member A [Source:MGI Symbol%3BAcc:MGI:2676309]	GO:0008150:biological_process;	GO:0005575:cellular_component;	GO:0003674:molecular_function;	-
ENSMUSG00000044258	39.4662	5.06268	0.48202	10.5031	8.36e-26	3.05e-24	13	60934155	60936625	-	Ctla2a	cytotoxic T lymphocyte-associated protein 2 alpha [Source:MGI Symbol%3BAcc:MGI:88554]	GO:0006508:proteolysis;GO:0010955:negative regulation of protein processing;GO:0045589:regulation of regulatory T cell differentiation;GO:0050728:negative regulation of inflammatory response;	GO:0005576:extracellular region;GO:0030425:dendrite;	GO:0008234:cysteine-type peptidase activity;	-
ENSMUSG00000111977	156.178	2.34086	0.223066	10.494	9.2e-26	3.36e-24	10	79637856	79639520	+	AC132265.1	-	-	-	-	-
ENSMUSG00000046402	61.0967	3.97167	0.378652	10.489	9.71e-26	3.53e-24	9	98422961	98446575	+	Rbp1	retinol binding protein 1%2C cellular [Source:MGI Symbol%3BAcc:MGI:97876]	GO:0002138:retinoic acid biosynthetic process;GO:0006776:vitamin A metabolic process;GO:0006810:transport;GO:0030852:regulation of granulocyte differentiation;GO:0033189:response to vitamin A;GO:0042572:retinol metabolic process;GO:0042573:retinoic acid metabolic process;	GO:0005654:nucleoplasm;GO:0005829:cytosol;GO:0044297:cell body;	GO:0005215:transporter activity;GO:0005501:retinoid binding;GO:0016918:retinal binding;GO:0019841:retinol binding;	-
ENSMUSG00000001119	4261.23	1.90019	0.181174	10.4882	9.79e-26	3.56e-24	10	76708792	76726168	-	Col6a1	collagen%2C type VI%2C alpha 1 [Source:MGI Symbol%3BAcc:MGI:88459]	GO:0001649:osteoblast differentiation;GO:0007155:cell adhesion;GO:0035987:endodermal cell differentiation;GO:0070208:protein heterotrimerization;GO:0071230:cellular response to amino acid stimulus;	GO:0005576:extracellular region;GO:0005578:proteinaceous extracellular matrix;GO:0005581:collagen trimer;GO:0005615:extracellular space;GO:0005765:lysosomal membrane;GO:0016020:membrane;GO:0031012:extracellular matrix;GO:0042383:sarcolemma;GO:0043234:protein complex;GO:0070062:extracellular exosome;	GO:0048407:platelet-derived growth factor binding;	K06238
ENSMUSG00000020326	1085.88	1.28311	0.122558	10.4694	1.19e-25	4.33e-24	11	40748552	40755311	-	Ccng1	cyclin G1 [Source:MGI Symbol%3BAcc:MGI:102890]	GO:0007049:cell cycle;GO:0051301:cell division;GO:0051726:regulation of cell cycle;	GO:0005634:nucleus;	-	K10145
ENSMUSG00000038244	879.351	2.50514	0.239308	10.4683	1.21e-25	4.37e-24	7	112225856	112355194	+	Mical2	microtubule associated monooxygenase%2C calponin and LIM domain containing 2 [Source:MGI Symbol%3BAcc:MGI:2444947]	GO:0001947:heart looping;GO:0007010:cytoskeleton organization;GO:0007507:heart development;GO:0010735:positive regulation of transcription via serum response element binding;GO:0019417:sulfur oxidation;GO:0030042:actin filament depolymerization;GO:0055114:oxidation-reduction process;	GO:0005634:nucleus;	GO:0003779:actin binding;GO:0016709:oxidoreductase activity, acting on paired donors, with incorporation or reduction of molecular oxygen, NAD(P)H as one donor, and incorporation of one atom of oxygen;GO:0043914:NADPH:sulfur oxidoreductase activity;GO:0046872:metal ion binding;GO:0071949:FAD binding;	K19947
ENSMUSG00000027313	469.851	-1.32107	0.126366	-10.4543	1.4e-25	5.06e-24	2	119351229	119354381	+	Chac1	ChaC%2C cation transport regulator 1 [Source:MGI Symbol%3BAcc:MGI:1916315]	GO:0006751:glutathione catabolic process;GO:0006986:response to unfolded protein;GO:0007219:Notch signaling pathway;GO:0010955:negative regulation of protein processing;GO:0022008:neurogenesis;GO:0045746:negative regulation of Notch signaling pathway;GO:0070059:intrinsic apoptotic signaling pathway in response to endoplasmic reticulum stress;	GO:0005802:trans-Golgi network;GO:0005829:cytosol;	GO:0003839:gamma-glutamylcyclotransferase activity;GO:0005112:Notch binding;	K07232
ENSMUSG00000026208	52.2522	3.69068	0.353048	10.4538	1.41e-25	5.08e-24	1	75360329	75368579	+	Des	desmin [Source:MGI Symbol%3BAcc:MGI:94885]	GO:0007517:muscle organ development;GO:0045109:intermediate filament organization;	GO:0005737:cytoplasm;GO:0005856:cytoskeleton;GO:0005882:intermediate filament;GO:0005911:cell-cell junction;GO:0005916:fascia adherens;GO:0014704:intercalated disc;GO:0030018:Z disc;GO:0031594:neuromuscular junction;GO:0042383:sarcolemma;GO:0043292:contractile fiber;GO:0045111:intermediate filament cytoskeleton;GO:0070062:extracellular exosome;GO:0097512:cardiac myofibril;	GO:0005200:structural constituent of cytoskeleton;GO:0005515:protein binding;GO:0008092:cytoskeletal protein binding;GO:0042802:identical protein binding;	K07610
ENSMUSG00000028896	958.074	-1.02577	0.0982721	-10.438	1.66e-25	5.98e-24	4	132331919	132353605	-	Rcc1	regulator of chromosome condensation 1 [Source:MGI Symbol%3BAcc:MGI:1913989]	GO:0000082:G1/S transition of mitotic cell cycle;GO:0007052:mitotic spindle organization;GO:0007059:chromosome segregation;GO:0007088:regulation of mitotic nuclear division;GO:0043547:positive regulation of GTPase activity;GO:0051225:spindle assembly;GO:0051290:protein heterotetramerization;GO:0051301:cell division;	GO:0000790:nuclear chromatin;GO:0000794:condensed nuclear chromosome;GO:0005634:nucleus;GO:0005654:nucleoplasm;GO:0005737:cytoplasm;GO:0031965:nuclear membrane;GO:0043234:protein complex;	GO:0003682:chromatin binding;GO:0005087:Ran guanyl-nucleotide exchange factor activity;GO:0008536:Ran GTPase binding;GO:0031491:nucleosome binding;GO:0031492:nucleosomal DNA binding;GO:0042393:histone binding;GO:0043199:sulfate binding;GO:0046982:protein heterodimerization activity;	K11493
ENSMUSG00000060675	57.8556	3.16365	0.303097	10.4378	1.67e-25	5.99e-24	19	7557459	7588545	+	Pla2g16	phospholipase A2%2C group XVI [Source:MGI Symbol%3BAcc:MGI:2179715]	GO:0006641:triglyceride metabolic process;GO:0006644:phospholipid metabolic process;GO:0007031:peroxisome organization;GO:0008654:phospholipid biosynthetic process;GO:0016042:lipid catabolic process;GO:0045786:negative regulation of cell cycle;GO:0046485:ether lipid metabolic process;GO:1904177:regulation of adipose tissue development;	GO:0005777:peroxisome;GO:0005778:peroxisomal membrane;GO:0005783:endoplasmic reticulum;GO:0016021:integral component of membrane;GO:0048471:perinuclear region of cytoplasm;	GO:0004623:phospholipase A2 activity;GO:0008970:phosphatidylcholine 1-acylhydrolase activity;GO:0016746:transferase activity, transferring acyl groups;GO:0052739:phosphatidylserine 1-acylhydrolase activity;GO:0052740:1-acyl-2-lysophosphatidylserine acylhydrolase activity;	K16817
ENSMUSG00000052131	74.8883	3.04724	0.292279	10.4258	1.89e-25	6.78e-24	6	34412334	34423142	+	Akr1b7	aldo-keto reductase family 1%2C member B7 [Source:MGI Symbol%3BAcc:MGI:101918]	GO:0044255:cellular lipid metabolic process;GO:0055114:oxidation-reduction process;	GO:0005739:mitochondrion;	GO:0004032:alditol:NADP+ 1-oxidoreductase activity;	K00011
ENSMUSG00000031584	2553.33	-1.36844	0.131363	-10.4173	2.07e-25	7.4e-24	8	33652523	33698163	+	Gsr	glutathione reductase [Source:MGI Symbol%3BAcc:MGI:95804]	GO:0006749:glutathione metabolic process;GO:0045454:cell redox homeostasis;GO:0055114:oxidation-reduction process;	GO:0005739:mitochondrion;GO:0009897:external side of plasma membrane;GO:0070062:extracellular exosome;	GO:0004362:glutathione-disulfide reductase activity;GO:0050660:flavin adenine dinucleotide binding;GO:0050661:NADP binding;	K00383
ENSMUSG00000031967	1909.8	-1.17454	0.112989	-10.3952	2.61e-25	9.32e-24	8	123477903	123503916	+	Afg3l1	AFG3-like AAA ATPase 1 [Source:MGI Symbol%3BAcc:MGI:1928277]	GO:0007005:mitochondrion organization;GO:0008053:mitochondrial fusion;GO:0034982:mitochondrial protein processing;GO:0042407:cristae formation;	GO:0005739:mitochondrion;GO:0005745:m-AAA complex;	GO:0004222:metalloendopeptidase activity;GO:0005524:ATP binding;GO:0008270:zinc ion binding;	-
ENSMUSG00000025223	4407.44	0.757287	0.0730309	10.3694	3.42e-25	1.22e-23	19	46032593	46045214	-	Ldb1	LIM domain binding 1 [Source:MGI Symbol%3BAcc:MGI:894762]	GO:0000972:transcription-dependent tethering of RNA polymerase II gene DNA at nuclear periphery;GO:0001702:gastrulation with mouth forming second;GO:0001942:hair follicle development;GO:0006366:transcription from RNA polymerase II promoter;GO:0009948:anterior/posterior axis specification;GO:0010669:epithelial structure maintenance;GO:0016055:Wnt signaling pathway;GO:0021549:cerebellum development…	GO:0000790:nuclear chromatin;GO:0005634:nucleus;GO:0005667:transcription factor complex;GO:0031252:cell leading edge;GO:0043234:protein complex;	GO:0000989:transcription factor binding transcription factor activity;GO:0001102:RNA polymerase II activating transcription factor binding;GO:0001158:enhancer sequence-specific DNA binding;GO:0003677:DNA binding;GO:0003682:chromatin binding;GO:0005515:protein binding;GO:0019899:enzyme binding;GO:0030274:LIM domain binding;GO:0042803:protein homodimerization activity;GO:0043621:protein self-associ…	K15617
ENSMUSG00000024593	272.535	4.8805	0.470913	10.3639	3.62e-25	1.29e-23	18	57133090	57297467	+	Megf10	multiple EGF-like-domains 10 [Source:MGI Symbol%3BAcc:MGI:2685177]	GO:0006898:receptor-mediated endocytosis;GO:0014719:skeletal muscle satellite cell activation;GO:0014816:skeletal muscle satellite cell differentiation;GO:0014841:skeletal muscle satellite cell proliferation;GO:0033002:muscle cell proliferation;GO:0034109:homotypic cell-cell adhesion;GO:0043652:engulfment of apoptotic cell;GO:0043654:recognition of apoptotic cell;GO:0048641:regulation of skeletal…	GO:0001891:phagocytic cup;GO:0005886:plasma membrane;GO:0016021:integral component of membrane;GO:0016323:basolateral plasma membrane;GO:0042995:cell projection;	GO:0001849:complement component C1q binding;GO:0005044:scavenger receptor activity;GO:0005112:Notch binding;	-
ENSMUSG00000072774	148.522	1.81417	0.175103	10.3606	3.75e-25	1.33e-23	5	104813169	104860070	-	Zfp951	zinc finger protein 951 [Source:MGI Symbol%3BAcc:MGI:2441896]	GO:0006355:regulation of transcription, DNA-templated;GO:0008150:biological_process;	GO:0005575:cellular_component;GO:0005622:intracellular;	GO:0003674:molecular_function;GO:0003676:nucleic acid binding;GO:0046872:metal ion binding;	K09228
ENSMUSG00000032232	730.692	-2.1644	0.20906	-10.353	4.06e-25	1.44e-23	9	71626509	71771602	-	Cgnl1	cingulin-like 1 [Source:MGI Symbol%3BAcc:MGI:1915428]	GO:0008150:biological_process;	GO:0005923:bicellular tight junction;GO:0015629:actin cytoskeleton;GO:0016459:myosin complex;GO:0043296:apical junction complex;	GO:0003674:molecular_function;GO:0003774:motor activity;	K21110
ENSMUSG00000031799	12626.8	-0.806638	0.0779596	-10.3469	4.32e-25	1.53e-23	8	72134975	72153142	+	Tpm4	tropomyosin 4 [Source:MGI Symbol%3BAcc:MGI:2449202]	GO:0001649:osteoblast differentiation;GO:0006936:muscle contraction;GO:0007015:actin filament organization;	GO:0001725:stress fiber;GO:0002102:podosome;GO:0005737:cytoplasm;GO:0005862:muscle thin filament tropomyosin;GO:0005925:focal adhesion;GO:0015629:actin cytoskeleton;GO:0016020:membrane;GO:0030863:cortical cytoskeleton;GO:0031941:filamentous actin;GO:0070062:extracellular exosome;	GO:0008307:structural constituent of muscle;GO:0042802:identical protein binding;GO:0042803:protein homodimerization activity;GO:0046872:metal ion binding;GO:0046982:protein heterodimerization activity;GO:0051015:actin filament binding;	K10375
ENSMUSG00000024378	657.485	1.13658	0.109863	10.3454	4.39e-25	1.55e-23	18	33199355	33213862	-	Stard4	StAR-related lipid transfer (START) domain containing 4 [Source:MGI Symbol%3BAcc:MGI:2156764]	GO:0010873:positive regulation of cholesterol esterification;GO:0010879:cholesterol transport involved in cholesterol storage;GO:0032367:intracellular cholesterol transport;GO:0034435:cholesterol esterification;GO:0070508:cholesterol import;GO:0070859:positive regulation of bile acid biosynthetic process;	GO:0005739:mitochondrion;GO:0005783:endoplasmic reticulum;GO:0005829:cytosol;GO:0031410:cytoplasmic vesicle;	GO:0015485:cholesterol binding;GO:0017127:cholesterol transporter activity;	-
ENSMUSG00000021611	107.813	2.89913	0.280564	10.3332	4.99e-25	1.76e-23	13	73626911	73649843	+	Tert	telomerase reverse transcriptase [Source:MGI Symbol%3BAcc:MGI:1202709]	GO:0001172:transcription, RNA-templated;GO:0006278:RNA-dependent DNA replication;GO:0007004:telomere maintenance via telomerase;GO:0007005:mitochondrion organization;GO:0010629:negative regulation of gene expression;GO:0022616:DNA strand elongation;GO:0030177:positive regulation of Wnt signaling pathway;GO:0030422:production of siRNA involved in RNA interference;GO:0031647:regulation of protein s…	GO:0000333:telomerase catalytic core complex;GO:0000784:nuclear chromosome, telomeric region;GO:0005634:nucleus;GO:0005654:nucleoplasm;GO:0005697:telomerase holoenzyme complex;GO:0005730:nucleolus;GO:0005737:cytoplasm;GO:0005739:mitochondrion;GO:0005886:plasma membrane;GO:0016605:PML body;GO:0031379:RNA-directed RNA polymerase complex;GO:0042645:mitochondrial nucleoid;GO:1990572:TERT-RMRP complex;	GO:0000049:tRNA binding;GO:0001223:transcription coactivator binding;GO:0003677:DNA binding;GO:0003720:telomerase activity;GO:0003721:telomeric template RNA reverse transcriptase activity;GO:0003723:RNA binding;GO:0003964:RNA-directed DNA polymerase activity;GO:0003968:RNA-directed RNA polymerase activity;GO:0005515:protein binding;GO:0008022:protein C-terminus binding;GO:0016779:nucleotidyltrans…	K11126
ENSMUSG00000031832	346.506	-1.36582	0.132181	-10.333	5e-25	1.76e-23	8	119597871	119605222	-	Taf1c	TATA-box binding protein associated factor%2C RNA polymerase I%2C C [Source:MGI Symbol%3BAcc:MGI:109576]	GO:0000183:chromatin silencing at rDNA;GO:0006360:transcription from RNA polymerase I promoter;GO:0006361:transcription initiation from RNA polymerase I promoter;	GO:0000120:RNA polymerase I transcription factor complex;GO:0001650:fibrillar center;GO:0005654:nucleoplasm;GO:0005730:nucleolus;	GO:0001164:RNA polymerase I CORE element sequence-specific DNA binding;GO:0005515:protein binding;	-
ENSMUSG00000047747	150.212	2.28689	0.221324	10.3328	5.01e-25	1.76e-23	8	82863356	83091268	+	Rnf150	ring finger protein 150 [Source:MGI Symbol%3BAcc:MGI:2443860]	GO:0008150:biological_process;	GO:0005575:cellular_component;GO:0016021:integral component of membrane;	GO:0003674:molecular_function;GO:0046872:metal ion binding;	-
ENSMUSG00000000594	255.345	1.47857	0.143223	10.3236	5.51e-25	1.93e-23	11	55098115	55113029	+	Gm2a	GM2 ganglioside activator protein [Source:MGI Symbol%3BAcc:MGI:95762]	GO:0006689:ganglioside catabolic process;GO:0006869:lipid transport;GO:0007611:learning or memory;GO:0009313:oligosaccharide catabolic process;GO:0019915:lipid storage;GO:0050877:neurological system process;GO:0050885:neuromuscular process controlling balance;GO:0051345:positive regulation of hydrolase activity;	GO:0005739:mitochondrion;GO:0005764:lysosome;GO:0005889:hydrogen:potassium-exchanging ATPase complex;GO:0009898:cytoplasmic side of plasma membrane;GO:0045179:apical cortex;GO:0070062:extracellular exosome;	GO:0004563:beta-N-acetylhexosaminidase activity;GO:0005319:lipid transporter activity;GO:0008047:enzyme activator activity;GO:0016004:phospholipase activator activity;GO:0032428:beta-N-acetylgalactosaminidase activity;	K12383
ENSMUSG00000025171	740.489	1.32965	0.128953	10.3111	6.28e-25	2.2e-23	19	41981763	42034641	+	Ubtd1	ubiquitin domain containing 1 [Source:MGI Symbol%3BAcc:MGI:2385092]	GO:0008150:biological_process;	GO:0005575:cellular_component;	GO:0003674:molecular_function;GO:0043130:ubiquitin binding;	-
ENSMUSG00000026737	448.088	1.29284	0.125385	10.311	6.29e-25	2.2e-23	2	18842255	18998126	-	Pip4k2a	phosphatidylinositol-5-phosphate 4-kinase%2C type II%2C alpha [Source:MGI Symbol%3BAcc:MGI:1298206]	GO:0010506:regulation of autophagy;GO:0035855:megakaryocyte development;GO:0046854:phosphatidylinositol phosphorylation;GO:2000786:positive regulation of autophagosome assembly;	GO:0005634:nucleus;GO:0005776:autophagosome;GO:0005886:plasma membrane;	GO:0005524:ATP binding;GO:0016309:1-phosphatidylinositol-5-phosphate 4-kinase activity;	-
ENSMUSG00000032218	820.246	1.43449	0.139192	10.3058	6.63e-25	2.31e-23	9	70407692	70421547	-	Ccnb2	cyclin B2 [Source:MGI Symbol%3BAcc:MGI:88311]	GO:0001701:in utero embryonic development;GO:0007049:cell cycle;GO:0040007:growth;GO:0043029:T cell homeostasis;GO:0048538:thymus development;GO:0051301:cell division;	GO:0005634:nucleus;GO:0005813:centrosome;GO:0005829:cytosol;GO:0015630:microtubule cytoskeleton;GO:0016020:membrane;	GO:0045296:cadherin binding;	K21770
ENSMUSG00000043419	59.7997	-3.35009	0.325162	-10.3028	6.84e-25	2.38e-23	11	69340461	69342641	+	Chd3os	chromodomain helicase DNA binding protein 3%2C opposite strand [Source:MGI Symbol%3BAcc:MGI:1915359]	-	-	-	-
ENSMUSG00000027832	1882.78	-1.95724	0.190043	-10.2989	7.13e-25	2.48e-23	3	66219910	66225805	+	Ptx3	pentraxin related gene [Source:MGI Symbol%3BAcc:MGI:104641]	GO:0001878:response to yeast;GO:0008228:opsonization;GO:0044869:negative regulation by host of viral exo-alpha-sialidase activity;GO:0044871:negative regulation by host of viral glycoprotein metabolic process;GO:0045087:innate immune response;GO:0045429:positive regulation of nitric oxide biosynthetic process;GO:0046597:negative regulation of viral entry into host cell;GO:0050766:positive regulat…	GO:0005615:extracellular space;	GO:0001849:complement component C1q binding;GO:0001872:(1->3)-beta-D-glucan binding;GO:0042802:identical protein binding;GO:0046790:virion binding;	-
ENSMUSG00000074802	492.083	1.40626	0.136615	10.2936	7.53e-25	2.61e-23	10	89408823	89443967	-	Gas2l3	growth arrest-specific 2 like 3 [Source:MGI Symbol%3BAcc:MGI:1918780]	GO:0000226:microtubule cytoskeleton organization;GO:0030036:actin cytoskeleton organization;	GO:0005737:cytoplasm;GO:0005874:microtubule;GO:0015629:actin cytoskeleton;GO:0015630:microtubule cytoskeleton;	GO:0003779:actin binding;GO:0008017:microtubule binding;	-
ENSMUSG00000045903	168.148	2.4462	0.237698	10.2912	7.72e-25	2.67e-23	19	4984355	4989971	-	Npas4	neuronal PAS domain protein 4 [Source:MGI Symbol%3BAcc:MGI:2664186]	GO:0006366:transcription from RNA polymerase II promoter;GO:0007612:learning;GO:0007614:short-term memory;GO:0007616:long-term memory;GO:0030154:cell differentiation;GO:0032228:regulation of synaptic transmission, GABAergic;GO:0035176:social behavior;GO:0045893:positive regulation of transcription, DNA-templated;GO:0045944:positive regulation of transcription from RNA polymerase II promoter;GO:00…	GO:0005634:nucleus;GO:0005667:transcription factor complex;GO:0098794:postsynapse;	GO:0000978:RNA polymerase II core promoter proximal region sequence-specific DNA binding;GO:0000981:sequence-specific DNA binding RNA polymerase II transcription factor activity;GO:0001012:RNA polymerase II regulatory region DNA binding;GO:0001077:RNA polymerase II core promoter proximal region sequence-specific DNA binding transcription factor activity involved in positive regulation of transcri…	-
ENSMUSG00000030208	6492.95	0.774193	0.0752435	10.2892	7.89e-25	2.73e-23	6	135362545	135383173	+	Emp1	epithelial membrane protein 1 [Source:MGI Symbol%3BAcc:MGI:107941]	GO:0008219:cell death;GO:0016049:cell growth;GO:0032060:bleb assembly;	GO:0005886:plasma membrane;GO:0016021:integral component of membrane;	-	-
ENSMUSG00000027429	1291.77	-0.879452	0.0854906	-10.2871	8.05e-25	2.78e-23	2	144556229	144590749	+	Sec23b	SEC23 homolog B%2C COPII coat complex component [Source:MGI Symbol%3BAcc:MGI:1350925]	GO:0006886:intracellular protein transport;GO:0006888:ER to Golgi vesicle-mediated transport;	GO:0000139:Golgi membrane;GO:0005783:endoplasmic reticulum;GO:0005789:endoplasmic reticulum membrane;GO:0005794:Golgi apparatus;GO:0012505:endomembrane system;GO:0030127:COPII vesicle coat;GO:0033116:endoplasmic reticulum-Golgi intermediate compartment membrane;GO:0048471:perinuclear region of cytoplasm;	GO:0005515:protein binding;GO:0008270:zinc ion binding;	K14006
ENSMUSG00000041729	75.6793	2.77414	0.269683	10.2867	8.09e-25	2.79e-23	9	62419492	62537044	-	Coro2b	coronin%2C actin binding protein%2C 2B [Source:MGI Symbol%3BAcc:MGI:2444283]	GO:0030036:actin cytoskeleton organization;	GO:0005737:cytoplasm;GO:0015629:actin cytoskeleton;GO:0016020:membrane;	GO:0051015:actin filament binding;	-
ENSMUSG00000022629	380.839	1.73958	0.169132	10.2854	8.2e-25	2.82e-23	15	90933276	91049948	-	Kif21a	kinesin family member 21A [Source:MGI Symbol%3BAcc:MGI:109188]	GO:0007018:microtubule-based movement;	GO:0005737:cytoplasm;GO:0005871:kinesin complex;GO:0005874:microtubule;GO:0030424:axon;GO:0030425:dendrite;	GO:0003777:microtubule motor activity;GO:0005524:ATP binding;GO:0008017:microtubule binding;GO:0016887:ATPase activity;	K10395
ENSMUSG00000044367	42.216	-4.28179	0.416458	-10.2814	8.54e-25	2.93e-23	11	70216789	70221064	-	Slc16a13	solute carrier family 16 (monocarboxylic acid transporters)%2C member 13 [Source:MGI Symbol%3BAcc:MGI:1916559]	GO:0015718:monocarboxylic acid transport;GO:0055085:transmembrane transport;	GO:0000139:Golgi membrane;GO:0005794:Golgi apparatus;GO:0005887:integral component of plasma membrane;	GO:0008028:monocarboxylic acid transmembrane transporter activity;GO:0015293:symporter activity;	K08189
ENSMUSG00000044345	627.881	1.07363	0.104499	10.274	9.23e-25	3.16e-23	19	42147400	42151703	+	Marveld1	MARVEL (membrane-associating) domain containing 1 [Source:MGI Symbol%3BAcc:MGI:2147570]	GO:0001766:membrane raft polarization;GO:0007049:cell cycle;GO:0008104:protein localization;GO:0042552:myelination;	GO:0005634:nucleus;GO:0005737:cytoplasm;GO:0005856:cytoskeleton;GO:0005886:plasma membrane;GO:0016021:integral component of membrane;GO:0045121:membrane raft;	GO:0019911:structural constituent of myelin sheath;	-
ENSMUSG00000069920	152.87	-2.03406	0.19799	-10.2736	9.27e-25	3.17e-23	8	105252638	105255153	-	B3gnt9	UDP-GlcNAc:betaGal beta-1%2C3-N-acetylglucosaminyltransferase 9 [Source:MGI Symbol%3BAcc:MGI:2142841]	GO:0006486:protein glycosylation;	GO:0000139:Golgi membrane;GO:0001650:fibrillar center;GO:0005794:Golgi apparatus;GO:0016021:integral component of membrane;	GO:0008378:galactosyltransferase activity;	K18705
ENSMUSG00000031772	37.4072	-4.83589	0.470857	-10.2704	9.58e-25	3.27e-23	8	112570043	112882717	+	Cntnap4	contactin associated protein-like 4 [Source:MGI Symbol%3BAcc:MGI:2183572]	GO:0007155:cell adhesion;GO:0032225:regulation of synaptic transmission, dopaminergic;GO:0032228:regulation of synaptic transmission, GABAergic;GO:2000821:regulation of grooming behavior;	GO:0016021:integral component of membrane;GO:0030054:cell junction;GO:0030425:dendrite;GO:0042734:presynaptic membrane;	GO:0005515:protein binding;	-
ENSMUSG00000005413	26713.8	-1.19576	0.116457	-10.2679	9.84e-25	3.35e-23	8	75093621	75100589	+	Hmox1	heme oxygenase 1 [Source:MGI Symbol%3BAcc:MGI:96163]	GO:0001525:angiogenesis;GO:0002246:wound healing involved in inflammatory response;GO:0006788:heme oxidation;GO:0006879:cellular iron ion homeostasis;GO:0006979:response to oxidative stress;GO:0007264:small GTPase mediated signal transduction;GO:0008217:regulation of blood pressure;GO:0008630:intrinsic apoptotic signaling pathway in response to DNA damage;GO:0010656:negative regulation of muscle …	GO:0005634:nucleus;GO:0005730:nucleolus;GO:0005783:endoplasmic reticulum;GO:0005789:endoplasmic reticulum membrane;GO:0005829:cytosol;GO:0005901:caveola;GO:0016020:membrane;GO:0048471:perinuclear region of cytoplasm;	GO:0004392:heme oxygenase (decyclizing) activity;GO:0004630:phospholipase D activity;GO:0004871:signal transducer activity;GO:0019899:enzyme binding;GO:0020037:heme binding;GO:0042803:protein homodimerization activity;GO:0046872:metal ion binding;	K00510
ENSMUSG00000019978	1781.94	1.2363	0.120505	10.2593	1.08e-24	3.66e-23	10	25359798	25523519	+	Epb41l2	erythrocyte membrane protein band 4.1 like 2 [Source:MGI Symbol%3BAcc:MGI:103009]	GO:0006810:transport;GO:0007049:cell cycle;GO:0008360:regulation of cell shape;GO:0030036:actin cytoskeleton organization;GO:0030866:cortical actin cytoskeleton organization;GO:0031032:actomyosin structure organization;GO:0051301:cell division;	GO:0005634:nucleus;GO:0005654:nucleoplasm;GO:0005856:cytoskeleton;GO:0005886:plasma membrane;GO:0005925:focal adhesion;GO:0008180:COP9 signalosome;GO:0015629:actin cytoskeleton;GO:0030054:cell junction;GO:0070062:extracellular exosome;	GO:0003779:actin binding;GO:0005200:structural constituent of cytoskeleton;GO:0005515:protein binding;GO:0030507:spectrin binding;GO:0042731:PH domain binding;	K06107
ENSMUSG00000020108	618.088	1.19923	0.116968	10.2527	1.15e-24	3.91e-23	10	59949669	59951834	-	Ddit4	DNA-damage-inducible transcript 4 [Source:MGI Symbol%3BAcc:MGI:1921997]	GO:0001666:response to hypoxia;GO:0001764:neuron migration;GO:0007420:brain development;GO:0008283:cell proliferation;GO:0010801:negative regulation of peptidyl-threonine phosphorylation;GO:0030182:neuron differentiation;GO:0032007:negative regulation of TOR signaling;GO:0033137:negative regulation of peptidyl-serine phosphorylation;GO:0042771:intrinsic apoptotic signaling pathway in response to …	GO:0005622:intracellular;GO:0005737:cytoplasm;GO:0005739:mitochondrion;GO:0005829:cytosol;	GO:0071889:14-3-3 protein binding;	K08270
ENSMUSG00000004266	71.2851	2.81338	0.274565	10.2467	1.22e-24	4.15e-23	6	124720707	124738714	-	Ptpn6	protein tyrosine phosphatase%2C non-receptor type 6 [Source:MGI Symbol%3BAcc:MGI:96055]	GO:0002244:hematopoietic progenitor cell differentiation;GO:0002924:negative regulation of humoral immune response mediated by circulating immunoglobulin;GO:0006470:protein dephosphorylation;GO:0008283:cell proliferation;GO:0008284:positive regulation of cell proliferation;GO:0014068:positive regulation of phosphatidylinositol 3-kinase signaling;GO:0018108:peptidyl-tyrosine phosphorylation;GO:001…	GO:0005634:nucleus;GO:0005730:nucleolus;GO:0005737:cytoplasm;GO:0005829:cytosol;GO:0005911:cell-cell junction;GO:0042105:alpha-beta T cell receptor complex;GO:0043234:protein complex;GO:0070062:extracellular exosome;	GO:0001784:phosphotyrosine binding;GO:0004725:protein tyrosine phosphatase activity;GO:0005001:transmembrane receptor protein tyrosine phosphatase activity;GO:0005515:protein binding;GO:0017124:SH3 domain binding;GO:0019901:protein kinase binding;GO:0042169:SH2 domain binding;GO:0050839:cell adhesion molecule binding;	K05697;K01104
ENSMUSG00000018604	544.301	-1.52875	0.149568	-10.2211	1.6e-24	5.4e-23	5	119670669	119684724	+	Tbx3	T-box 3 [Source:MGI Symbol%3BAcc:MGI:98495]	GO:0000122:negative regulation of transcription from RNA polymerase II promoter;GO:0001501:skeletal system development;GO:0001568:blood vessel development;GO:0001701:in utero embryonic development;GO:0001947:heart looping;GO:0003007:heart morphogenesis;GO:0003151:outflow tract morphogenesis;GO:0003167:atrioventricular bundle cell differentiation;GO:0006351:transcription, DNA-templated;GO:0007569:…	GO:0005634:nucleus;	GO:0000978:RNA polymerase II core promoter proximal region sequence-specific DNA binding;GO:0001078:RNA polymerase II core promoter proximal region sequence-specific DNA binding transcription factor activity involved in negative regulation of transcription;GO:0001085:RNA polymerase II transcription factor binding;GO:0001102:RNA polymerase II activating transcription factor binding;GO:0003700:sequ…	K10177
ENSMUSG00000079481	37.979	4.67673	0.457995	10.2113	1.76e-24	5.96e-23	X	101849385	102092055	+	Nhsl2	NHS-like 2 [Source:MGI Symbol%3BAcc:MGI:3645090]	GO:0030154:cell differentiation;	GO:0005575:cellular_component;	GO:0003674:molecular_function;	-
ENSMUSG00000050288	1839.69	1.00828	0.0988413	10.201	1.96e-24	6.62e-23	11	102604396	102608058	+	Fzd2	frizzled class receptor 2 [Source:MGI Symbol%3BAcc:MGI:1888513]	GO:0003149:membranous septum morphogenesis;GO:0003150:muscular septum morphogenesis;GO:0003151:outflow tract morphogenesis;GO:0007186:G-protein coupled receptor signaling pathway;GO:0007267:cell-cell signaling;GO:0007608:sensory perception of smell;GO:0030825:positive regulation of cGMP metabolic process;GO:0030855:epithelial cell differentiation;GO:0045893:positive regulation of transcription, D…	GO:0005737:cytoplasm;GO:0005886:plasma membrane;GO:0005925:focal adhesion;GO:0016021:integral component of membrane;	GO:0004930:G-protein coupled receptor activity;GO:0005515:protein binding;GO:0017147:Wnt-protein binding;GO:0030165:PDZ domain binding;GO:0042813:Wnt-activated receptor activity;	K02235
ENSMUSG00000030301	357.684	1.38364	0.135721	10.1947	2.09e-24	7.05e-23	6	147475828	147632612	+	Ccdc91	coiled-coil domain containing 91 [Source:MGI Symbol%3BAcc:MGI:1914265]	GO:0015031:protein transport;GO:0090160:Golgi to lysosome transport;	GO:0005654:nucleoplasm;GO:0005794:Golgi apparatus;GO:0005802:trans-Golgi network;GO:0005829:cytosol;GO:0016020:membrane;	GO:0042802:identical protein binding;	-
ENSMUSG00000028348	105.782	-2.35956	0.231542	-10.1906	2.18e-24	7.34e-23	4	48663514	48673502	+	Murc	muscle-related coiled-coil protein [Source:MGI Symbol%3BAcc:MGI:1915266]	-	-	-	-
ENSMUSG00000030790	90.8315	-2.59799	0.255431	-10.171	2.67e-24	8.96e-23	7	110627661	110629820	+	Adm	adrenomedullin [Source:MGI Symbol%3BAcc:MGI:108058]	GO:0001570:vasculogenesis;GO:0001666:response to hypoxia;GO:0001843:neural tube closure;GO:0002026:regulation of the force of heart contraction;GO:0002031:G-protein coupled receptor internalization;GO:0003073:regulation of systemic arterial blood pressure;GO:0006171:cAMP biosynthetic process;GO:0007204:positive regulation of cytosolic calcium ion concentration;GO:0007507:heart development;GO:0007…	GO:0005615:extracellular space;GO:0005737:cytoplasm;	GO:0005179:hormone activity;GO:0031700:adrenomedullin receptor binding;	K12333
ENSMUSG00000038984	37.6855	4.66024	0.458669	10.1604	2.98e-24	9.98e-23	15	33683876	33687883	-	Tspyl5	testis-specific protein%2C Y-encoded-like 5 [Source:MGI Symbol%3BAcc:MGI:2442458]	GO:0006334:nucleosome assembly;GO:0008284:positive regulation of cell proliferation;GO:0031398:positive regulation of protein ubiquitination;GO:0040008:regulation of growth;GO:0051897:positive regulation of protein kinase B signaling;GO:0071480:cellular response to gamma radiation;	GO:0005575:cellular_component;GO:0005634:nucleus;	GO:0003674:molecular_function;	K11288
ENSMUSG00000002897	499.249	-2.23079	0.219586	-10.1591	3.02e-24	1.01e-22	6	120463247	120487559	+	Il17ra	interleukin 17 receptor A [Source:MGI Symbol%3BAcc:MGI:107399]	GO:0019221:cytokine-mediated signaling pathway;GO:0032747:positive regulation of interleukin-23 production;GO:0050729:positive regulation of inflammatory response;GO:0050832:defense response to fungus;GO:0071621:granulocyte chemotaxis;GO:0072537:fibroblast activation;GO:1900017:positive regulation of cytokine production involved in inflammatory response;GO:2000664:positive regulation of interleuk…	GO:0005886:plasma membrane;GO:0005887:integral component of plasma membrane;	GO:0005102:receptor binding;GO:0030368:interleukin-17 receptor activity;	K05164
ENSMUSG00000032291	584.953	2.65095	0.261073	10.1541	3.18e-24	1.06e-22	9	54764748	54773110	+	Crabp1	cellular retinoic acid binding protein I [Source:MGI Symbol%3BAcc:MGI:88490]	GO:0006810:transport;GO:0034653:retinoic acid catabolic process;	GO:0005737:cytoplasm;GO:0005829:cytosol;	GO:0001972:retinoic acid binding;GO:0005215:transporter activity;GO:0005501:retinoid binding;GO:0016918:retinal binding;GO:0019841:retinol binding;	K17337
ENSMUSG00000028270	74.2549	-2.79971	0.275744	-10.1533	3.2e-24	1.07e-22	3	142620602	142638008	+	Gbp2	guanylate binding protein 2 [Source:MGI Symbol%3BAcc:MGI:102772]	GO:0035458:cellular response to interferon-beta;GO:0042832:defense response to protozoan;GO:0044406:adhesion of symbiont to host;GO:0050830:defense response to Gram-positive bacterium;GO:0071222:cellular response to lipopolysaccharide;GO:0071346:cellular response to interferon-gamma;	GO:0000139:Golgi membrane;GO:0005654:nucleoplasm;GO:0005829:cytosol;GO:0015629:actin cytoskeleton;GO:0020005:symbiont-containing vacuole membrane;GO:0031410:cytoplasmic vesicle;GO:0048471:perinuclear region of cytoplasm;	GO:0003924:GTPase activity;GO:0005525:GTP binding;	K20897
ENSMUSG00000095567	2272.24	-0.861522	0.084941	-10.1426	3.57e-24	1.19e-22	4	156236010	156247616	+	Noc2l	NOC2 like nucleolar associated transcriptional repressor [Source:MGI Symbol%3BAcc:MGI:1931051]	GO:0000122:negative regulation of transcription from RNA polymerase II promoter;GO:0002903:negative regulation of B cell apoptotic process;GO:0006351:transcription, DNA-templated;GO:0006915:apoptotic process;GO:0031497:chromatin assembly;GO:0032066:nucleolus to nucleoplasm transport;GO:0034644:cellular response to UV;GO:0035067:negative regulation of histone acetylation;GO:0042273:ribosomal large…	GO:0005634:nucleus;GO:0005654:nucleoplasm;GO:0005730:nucleolus;GO:0005829:cytosol;GO:0030690:Noc1p-Noc2p complex;GO:0030691:Noc2p-Noc3p complex;	GO:0002039:p53 binding;GO:0003682:chromatin binding;GO:0003714:transcription corepressor activity;GO:0003723:RNA binding;GO:0031491:nucleosome binding;GO:0031493:nucleosomal histone binding;GO:0042393:histone binding;GO:0070491:repressing transcription factor binding;	K14833
ENSMUSG00000031557	1294.36	1.03763	0.10239	10.1341	3.9e-24	1.29e-22	8	25039144	25102376	-	Plekha2	pleckstrin homology domain-containing%2C family A (phosphoinositide binding specific) member 2 [Source:MGI Symbol%3BAcc:MGI:1928144]	GO:0001954:positive regulation of cell-matrix adhesion;	GO:0005634:nucleus;GO:0005737:cytoplasm;GO:0005886:plasma membrane;GO:0016020:membrane;GO:0043234:protein complex;	GO:0001968:fibronectin binding;GO:0005515:protein binding;GO:0030165:PDZ domain binding;GO:0043236:laminin binding;GO:0043325:phosphatidylinositol-3,4-bisphosphate binding;	-
ENSMUSG00000022797	2608.45	-1.18908	0.117338	-10.1339	3.91e-24	1.3e-22	16	32608920	32632794	+	Tfrc	transferrin receptor [Source:MGI Symbol%3BAcc:MGI:98822]	GO:0006879:cellular iron ion homeostasis;GO:0030316:osteoclast differentiation;GO:0030890:positive regulation of B cell proliferation;GO:0031623:receptor internalization;GO:0031668:cellular response to extracellular stimulus;GO:0033572:transferrin transport;GO:0034755:iron ion transmembrane transport;GO:0035690:cellular response to drug;GO:0042102:positive regulation of T cell proliferation;GO:00…	GO:0005576:extracellular region;GO:0005615:extracellular space;GO:0005768:endosome;GO:0005886:plasma membrane;GO:0005887:integral component of plasma membrane;GO:0005905:coated pit;GO:0009897:external side of plasma membrane;GO:0009986:cell surface;GO:0010008:endosome membrane;GO:0016020:membrane;GO:0016323:basolateral plasma membrane;GO:0031410:cytoplasmic vesicle;GO:0042470:melanosome;GO:004847…	GO:0001948:glycoprotein binding;GO:0003723:RNA binding;GO:0003725:double-stranded RNA binding;GO:0004998:transferrin receptor activity;GO:0005381:iron ion transmembrane transporter activity;GO:0005515:protein binding;GO:0033570:transferrin transmembrane transporter activity;GO:0042802:identical protein binding;GO:0042803:protein homodimerization activity;	-
ENSMUSG00000036904	196.6	1.56573	0.154566	10.1298	4.07e-24	1.35e-22	18	9212856	9216201	+	Fzd8	frizzled class receptor 8 [Source:MGI Symbol%3BAcc:MGI:108460]	GO:0000122:negative regulation of transcription from RNA polymerase II promoter;GO:0001525:angiogenesis;GO:0001934:positive regulation of protein phosphorylation;GO:0007186:G-protein coupled receptor signaling pathway;GO:0016055:Wnt signaling pathway;GO:0033077:T cell differentiation in thymus;GO:0035567:non-canonical Wnt signaling pathway;GO:0043507:positive regulation of JUN kinase activity;GO:…	GO:0005576:extracellular region;GO:0005794:Golgi apparatus;GO:0005886:plasma membrane;GO:0016021:integral component of membrane;	GO:0004930:G-protein coupled receptor activity;GO:0005102:receptor binding;GO:0005515:protein binding;GO:0017147:Wnt-protein binding;GO:0030165:PDZ domain binding;GO:0031625:ubiquitin protein ligase binding;GO:0042813:Wnt-activated receptor activity;	K02375
ENSMUSG00000042644	1757.03	2.42538	0.239542	10.1251	4.28e-24	1.41e-22	17	27057304	27122223	+	Itpr3	inositol 1%2C4%2C5-triphosphate receptor 3 [Source:MGI Symbol%3BAcc:MGI:96624]	GO:0006816:calcium ion transport;GO:0007613:memory;GO:0048016:inositol phosphate-mediated signaling;GO:0050913:sensory perception of bitter taste;GO:0050916:sensory perception of sweet taste;GO:0050917:sensory perception of umami taste;GO:0051209:release of sequestered calcium ion into cytosol;GO:0051592:response to calcium ion;GO:0060291:long-term synaptic potentiation;GO:0060402:calcium ion tra…	GO:0005634:nucleus;GO:0005654:nucleoplasm;GO:0005730:nucleolus;GO:0005737:cytoplasm;GO:0005789:endoplasmic reticulum membrane;GO:0005886:plasma membrane;GO:0005887:integral component of plasma membrane;GO:0016020:membrane;GO:0043235:receptor complex;	GO:0005220:inositol 1,4,5-trisphosphate-sensitive calcium-release channel activity;GO:0005509:calcium ion binding;GO:0005515:protein binding;GO:0015278:calcium-release channel activity;GO:0035091:phosphatidylinositol binding;GO:0070679:inositol 1,4,5 trisphosphate binding;	K04960
ENSMUSG00000044252	724.825	1.29532	0.128003	10.1195	4.53e-24	1.49e-22	18	12755314	12941841	-	Osbpl1a	oxysterol binding protein-like 1A [Source:MGI Symbol%3BAcc:MGI:1927551]	GO:0006869:lipid transport;GO:0008150:biological_process;	GO:0005770:late endosome;GO:0070062:extracellular exosome;	GO:0005515:protein binding;GO:0015485:cholesterol binding;	K20174
ENSMUSG00000085794	37.7641	-4.52778	0.448153	-10.1032	5.35e-24	1.76e-22	6	83692806	83712201	-	Vax2os	ventral anterior homeobox 2%2C opposite strand [Source:MGI Symbol%3BAcc:MGI:3583301]	-	-	-	-
ENSMUSG00000036545	73.9701	2.68401	0.265666	10.103	5.36e-24	1.76e-22	11	50602084	50807573	+	Adamts2	a disintegrin-like and metallopeptidase (reprolysin type) with thrombospondin type 1 motif%2C 2 [Source:MGI Symbol%3BAcc:MGI:1347356]	GO:0007283:spermatogenesis;GO:0016485:protein processing;GO:0030199:collagen fibril organization;GO:0030324:lung development;GO:0030574:collagen catabolic process;GO:0043588:skin development;	GO:0005578:proteinaceous extracellular matrix;GO:0005615:extracellular space;	GO:0004222:metalloendopeptidase activity;GO:0008233:peptidase activity;GO:0008270:zinc ion binding;	K08618
ENSMUSG00000009772	201.088	1.89335	0.187457	10.1002	5.51e-24	1.81e-22	1	132316126	132333488	+	Nuak2	NUAK family%2C SNF1-like kinase%2C 2 [Source:MGI Symbol%3BAcc:MGI:1921387]	GO:0006468:protein phosphorylation;GO:0006915:apoptotic process;GO:0030036:actin cytoskeleton organization;GO:0035556:intracellular signal transduction;GO:0042149:cellular response to glucose starvation;GO:0043066:negative regulation of apoptotic process;	GO:0005634:nucleus;GO:0005737:cytoplasm;GO:0016607:nuclear speck;	GO:0000287:magnesium ion binding;GO:0004674:protein serine/threonine kinase activity;GO:0005524:ATP binding;	K08800
ENSMUSG00000029068	3882.04	-0.777694	0.0770231	-10.0969	5.7e-24	1.87e-22	4	155812489	155824543	+	Ccnl2	cyclin L2 [Source:MGI Symbol%3BAcc:MGI:1927119]	GO:0006351:transcription, DNA-templated;GO:0045737:positive regulation of cyclin-dependent protein serine/threonine kinase activity;GO:0045944:positive regulation of transcription from RNA polymerase II promoter;GO:1901409:positive regulation of phosphorylation of RNA polymerase II C-terminal domain;	GO:0000307:cyclin-dependent protein kinase holoenzyme complex;GO:0005634:nucleus;GO:0005654:nucleoplasm;GO:0016607:nuclear speck;GO:0043231:intracellular membrane-bounded organelle;	GO:0005515:protein binding;GO:0016538:cyclin-dependent protein serine/threonine kinase regulator activity;GO:0019901:protein kinase binding;	-
ENSMUSG00000034040	200.513	2.24626	0.222607	10.0907	6.07e-24	1.99e-22	5	130872082	131308497	-	Wbscr17	Williams-Beuren syndrome chromosome region 17 homolog (human) [Source:MGI Symbol%3BAcc:MGI:2137594]	GO:0006486:protein glycosylation;GO:0008150:biological_process;	GO:0000139:Golgi membrane;GO:0005575:cellular_component;GO:0016021:integral component of membrane;	GO:0003674:molecular_function;GO:0004653:polypeptide N-acetylgalactosaminyltransferase activity;GO:0030246:carbohydrate binding;GO:0046872:metal ion binding;	-
ENSMUSG00000025666	882.771	1.22011	0.121073	10.0774	6.95e-24	2.27e-22	X	81070698	81097872	+	Tmem47	transmembrane protein 47 [Source:MGI Symbol%3BAcc:MGI:2177570]	-	GO:0005886:plasma membrane;GO:0005911:cell-cell junction;GO:0005912:adherens junction;GO:0016021:integral component of membrane;	GO:0005515:protein binding;	-
ENSMUSG00000061654	33.5011	4.89541	0.485856	10.0759	7.06e-24	2.3e-22	GL456233.1	101352	106395	-	Spry3	sprouty homolog 3 (Drosophila) [Source:MGI Symbol%3BAcc:MGI:1345188]	-	-	-	K17384
ENSMUSG00000089715	5293.34	1.10954	0.110432	10.0473	9.44e-24	3.07e-22	15	79823896	79834688	-	Cbx6	chromobox 6 [Source:MGI Symbol%3BAcc:MGI:3512628]	GO:0000122:negative regulation of transcription from RNA polymerase II promoter;GO:0006351:transcription, DNA-templated;GO:0016569:covalent chromatin modification;	GO:0000792:heterochromatin;GO:0005634:nucleus;GO:0031519:PcG protein complex;	GO:0003727:single-stranded RNA binding;	K11455;K11453
ENSMUSG00000037321	52.9827	-3.1948	0.318621	-10.027	1.16e-23	3.77e-22	17	34187553	34197225	+	Tap1	transporter 1%2C ATP-binding cassette%2C sub-family B (MDR/TAP) [Source:MGI Symbol%3BAcc:MGI:98483]	GO:0002250:adaptive immune response;GO:0006952:defense response;GO:0015031:protein transport;GO:0015833:peptide transport;GO:0019885:antigen processing and presentation of endogenous peptide antigen via MHC class I;GO:0046967:cytosol to ER transport;GO:0055085:transmembrane transport;	GO:0005739:mitochondrion;GO:0005783:endoplasmic reticulum;GO:0005815:microtubule organizing center;GO:0016020:membrane;GO:0016021:integral component of membrane;GO:0030176:integral component of endoplasmic reticulum membrane;GO:0030670:phagocytic vesicle membrane;GO:0042825:TAP complex;	GO:0005524:ATP binding;GO:0015197:peptide transporter activity;GO:0015433:peptide antigen-transporting ATPase activity;GO:0023029:MHC class Ib protein binding;GO:0042288:MHC class I protein binding;GO:0043531:ADP binding;GO:0046979:TAP2 binding;	K06147;K05653
ENSMUSG00000057914	139.277	1.77893	0.177483	10.0231	1.21e-23	3.91e-22	2	14603088	14987908	+	Cacnb2	calcium channel%2C voltage-dependent%2C beta 2 subunit [Source:MGI Symbol%3BAcc:MGI:894644]	GO:0007268:synaptic transmission;GO:0007528:neuromuscular junction development;GO:0007601:visual perception;GO:0051928:positive regulation of calcium ion transport;GO:0070509:calcium ion import;GO:0070588:calcium ion transmembrane transport;GO:0086045:membrane depolarization during AV node cell action potential;GO:0086091:regulation of heart rate by cardiac conduction;GO:0090002:establishment of …	GO:0005886:plasma membrane;GO:0005891:voltage-gated calcium channel complex;GO:1990454:L-type voltage-gated calcium channel complex;	GO:0005245:voltage-gated calcium channel activity;GO:0005515:protein binding;GO:0008331:high voltage-gated calcium channel activity;GO:0051015:actin filament binding;GO:0086007:voltage-gated calcium channel activity involved in cardiac muscle cell action potential;GO:0086056:voltage-gated calcium channel activity involved in AV node cell action potential;	K04863
ENSMUSG00000031657	2489.47	-1.09662	0.109466	-10.0179	1.27e-23	4.12e-22	8	88137855	88172027	+	Heatr3	HEAT repeat containing 3 [Source:MGI Symbol%3BAcc:MGI:2444491]	GO:0006606:protein import into nucleus;GO:0042273:ribosomal large subunit biogenesis;	GO:0005575:cellular_component;GO:0005622:intracellular;	GO:0051082:unfolded protein binding;	-
ENSMUSG00000040713	667.301	1.05074	0.105015	10.0056	1.44e-23	4.65e-22	1	165763746	165775308	+	Creg1	cellular repressor of E1A-stimulated genes 1 [Source:MGI Symbol%3BAcc:MGI:1344382]	GO:0006355:regulation of transcription, DNA-templated;GO:0040008:regulation of growth;	GO:0005615:extracellular space;GO:0005667:transcription factor complex;GO:0070062:extracellular exosome;	GO:0008134:transcription factor binding;GO:0048037:cofactor binding;	-
ENSMUSG00000016200	36.2357	4.89771	0.489932	9.99672	1.58e-23	5.08e-22	1	192891233	193035775	-	Syt14	synaptotagmin XIV [Source:MGI Symbol%3BAcc:MGI:2444490]	GO:0006906:vesicle fusion;GO:0017158:regulation of calcium ion-dependent exocytosis;GO:0048791:calcium ion-dependent exocytosis of neurotransmitter;	GO:0005886:plasma membrane;GO:0016021:integral component of membrane;	GO:0005509:calcium ion binding;GO:0005543:phospholipid binding;GO:0005544:calcium-dependent phospholipid binding;GO:0019905:syntaxin binding;GO:0030276:clathrin binding;GO:0042803:protein homodimerization activity;GO:0046982:protein heterodimerization activity;	K19328
[truncated: 51,314 more rows]
