# Supplementary material
Source: Research Square preprint supplement (doi:10.21203/rs.3.rs-8962384/v1)
Supplement: Supplementary file 5 [file b532c1577876d14af4df900c.xlsx]

## Sheet: Traf6+8 h-VS-Traf6-8
Pathway ID	Pathway	Level1	Level2	DEGs with pathway annotation (258)	All genes with pathway annotation (8727)	Pvalue	Qvalue	GeneNumber(Up)	GeneNumber(Down)	PathwayLink
ko05200	Pathways in cancer	Human Diseases	Cancers: Overview	33(12.79%)	523(5.99%)	1.07377e-05	0.0010165	18	15	http://www.kegg.jp/kegg-bin/show_pathway?scale=1.0&query=&map=ko05200&use=reference&multi_query=K05074+red%0D%0AK04379+blue%0D%0AK08774+red%0D%0AK18496+red%0D%0AK04289+blue%0D%0AK02649+blue%0D%0AK04738+blue%0D%0AK02354+red%0D%0AK04358+red%0D%0AK01384+blue%0D%0AK04275+red%0D%0AK06240+red%0D%0AK03914+red%0D%0AK09091+red%0D%0AK06052+red%0D%0AK06485+red%0D%0AK05405+blue%0D%0AK04544+blue%0D%0AK02599+r…
ko00780	Biotin metabolism	Metabolism	Metabolism of cofactors and vitamins	1(0.39%)	4(0.05%)	0.00502211	0.0493496	0	1	http://www.kegg.jp/kegg-bin/show_pathway?scale=1.0&query=&map=ko00780&use=reference&multi_query=K01942+blue%0D%0A
ko04933	AGE-RAGE signaling pathway in diabetic complications	Human Diseases	Endocrine and metabolic diseases	9(3.49%)	87(1.00%)	0.000231061	0.00820265	3	6	http://www.kegg.jp/kegg-bin/show_pathway?scale=1.0&query=&map=ko04933&use=reference&multi_query=K02649+blue%0D%0AK04383+blue%0D%0AK03907+red%0D%0AK05405+blue%0D%0AK06237+red%0D%0AK04674+blue%0D%0AK02161+red%0D%0AK01398+blue%0D%0AK04692+blue%0D%0A
ko04015	Rap1 signaling pathway	Environmental Information Processing	Signal transduction	13(5.04%)	210(2.41%)	0.00374166	0.0442763	9	4	http://www.kegg.jp/kegg-bin/show_pathway?scale=1.0&query=&map=ko04015&use=reference&multi_query=K18496+red%0D%0AK04289+blue%0D%0AK02649+blue%0D%0AK04358+red%0D%0AK04275+red%0D%0AK03914+red%0D%0AK06070+blue%0D%0AK04359+red%0D%0AK02583+red%0D%0AK05098+red%0D%0AK12490+red%0D%0AK04237+blue%0D%0A
ko05206	MicroRNAs in cancer	Human Diseases	Cancers: Overview	10(3.88%)	142(1.63%)	0.00318312	0.0395163	7	3	http://www.kegg.jp/kegg-bin/show_pathway?scale=1.0&query=&map=ko05206&use=reference&multi_query=K07606+red%0D%0AK06484+red%0D%0AK05867+red%0D%0AK02599+red%0D%0AK04359+red%0D%0AK02161+red%0D%0AK11987+blue%0D%0AK15379+red%0D%0AK17461+blue%0D%0AK04692+blue%0D%0A
ko04080	Neuroactive ligand-receptor interaction	Environmental Information Processing	Signaling molecules and interaction	18(6.98%)	275(3.15%)	0.000498638	0.0141613	13	5	http://www.kegg.jp/kegg-bin/show_pathway?scale=1.0&query=&map=ko04080&use=reference&multi_query=K05770+red%0D%0AK04289+blue%0D%0AK04577+red%0D%0AK05219+blue%0D%0AK05251+red%0D%0AK05185+red%0D%0AK04234+red%0D%0AK04157+red%0D%0AK04275+red%0D%0AK03914+red%0D%0AK04803+blue%0D%0AK04290+red%0D%0AK04299+red%0D%0AK05214+red%0D%0AK04237+blue%0D%0AK04264+red%0D%0AK05080+red%0D%0AK04218+blue%0D%0A
ko05218	Melanoma	Human Diseases	Cancers: Specific types	6(2.33%)	71(0.81%)	0.00482474	0.0493496	4	2	http://www.kegg.jp/kegg-bin/show_pathway?scale=1.0&query=&map=ko05218&use=reference&multi_query=K18496+red%0D%0AK02649+blue%0D%0AK04358+red%0D%0AK10140+blue%0D%0AK04359+red%0D%0A
ko05222	Small cell lung cancer	Human Diseases	Cancers: Specific types	8(3.10%)	100(1.15%)	0.00273424	0.0388263	5	3	http://www.kegg.jp/kegg-bin/show_pathway?scale=1.0&query=&map=ko05222&use=reference&multi_query=K02649+blue%0D%0AK06240+red%0D%0AK06485+red%0D%0AK06237+red%0D%0AK10140+blue%0D%0AK02161+red%0D%0AK11987+blue%0D%0AK06244+red%0D%0A
ko04630	Jak-STAT signaling pathway	Environmental Information Processing	Signal transduction	14(5.43%)	154(1.76%)	4.77518e-05	0.00339038	4	10	http://www.kegg.jp/kegg-bin/show_pathway?scale=1.0&query=&map=ko04630&use=reference&multi_query=K05074+red%0D%0AK05136+blue%0D%0AK02649+blue%0D%0AK04738+blue%0D%0AK04701+blue%0D%0AK05405+blue%0D%0AK04359+red%0D%0AK02161+red%0D%0AK05069+blue%0D%0AK05080+red%0D%0AK05079+blue%0D%0AK05423+blue%0D%0AK04696+blue%0D%0AK04692+blue%0D%0A
ko05410	Hypertrophic cardiomyopathy (HCM)	Human Diseases	Cardiovascular diseases	7(2.71%)	72(0.83%)	0.00121957	0.0216474	4	3	http://www.kegg.jp/kegg-bin/show_pathway?scale=1.0&query=&map=ko05410&use=reference&multi_query=K06484+red%0D%0AK06587+red%0D%0AK07198+blue%0D%0AK06485+red%0D%0AK05405+blue%0D%0AK12565+red%0D%0AK04858+blue%0D%0A
ko00660	C5-Branched dibasic acid metabolism	Metabolism	Carbohydrate metabolism	1(0.39%)	1(0.01%)	0	0	0	1	http://www.kegg.jp/kegg-bin/show_pathway?scale=1.0&query=&map=ko00660&use=reference&multi_query=K17724+blue%0D%0A
ko05205	Proteoglycans in cancer	Human Diseases	Cancers: Overview	13(5.04%)	198(2.27%)	0.00218635	0.0344957	6	7	http://www.kegg.jp/kegg-bin/show_pathway?scale=1.0&query=&map=ko05205&use=reference&multi_query=K16336+red%0D%0AK06484+red%0D%0AK02649+blue%0D%0AK02354+red%0D%0AK01384+blue%0D%0AK01365+blue%0D%0AK08122+blue%0D%0AK04515+red%0D%0AK10380+red%0D%0AK05760+blue%0D%0AK05098+red%0D%0AK01398+blue%0D%0AK04692+blue%0D%0A
ko04810	Regulation of actin cytoskeleton	Cellular Processes	Cell motility	16(6.20%)	202(2.31%)	9.67817e-05	0.0054972	14	2	http://www.kegg.jp/kegg-bin/show_pathway?scale=1.0&query=&map=ko04810&use=reference&multi_query=K00907+red%0D%0AK18496+red%0D%0AK06484+red%0D%0AK02649+blue%0D%0AK06587+red%0D%0AK06524+red%0D%0AK04358+red%0D%0AK03914+red%0D%0AK06485+red%0D%0AK05760+blue%0D%0AK04359+red%0D%0AK05722+red%0D%0AK05767+red%0D%0AK05750+red%0D%0AK12755+red%0D%0A
ko04668	TNF signaling pathway	Environmental Information Processing	Signal transduction	10(3.88%)	100(1.15%)	0.000168161	0.00682252	2	8	http://www.kegg.jp/kegg-bin/show_pathway?scale=1.0&query=&map=ko04668&use=reference&multi_query=K09028+blue%0D%0AK04379+blue%0D%0AK02649+blue%0D%0AK17072+red%0D%0AK06052+red%0D%0AK05505+blue%0D%0AK05405+blue%0D%0AK08849+blue%0D%0AK11987+blue%0D%0AK04696+blue%0D%0A
ko00261	Monobactam biosynthesis	Metabolism	Biosynthesis of other secondary metabolites	1(0.39%)	2(0.02%)	0.000870708	0.0191266	1	0	http://www.kegg.jp/kegg-bin/show_pathway?scale=1.0&query=&map=ko00261&use=reference&multi_query=K13811+red%0D%0A
ko05224	Breast cancer	Human Diseases	Cancers: Specific types	11(4.26%)	140(1.60%)	0.000875512	0.0191266	7	4	http://www.kegg.jp/kegg-bin/show_pathway?scale=1.0&query=&map=ko05224&use=reference&multi_query=K04379+blue%0D%0AK18496+red%0D%0AK02649+blue%0D%0AK02354+red%0D%0AK04358+red%0D%0AK01384+blue%0D%0AK09091+red%0D%0AK06052+red%0D%0AK02599+red%0D%0AK10140+blue%0D%0A
ko04971	Gastric acid secretion	Organismal Systems	Digestive system	6(2.33%)	64(0.73%)	0.0026834	0.0388263	5	1	http://www.kegg.jp/kegg-bin/show_pathway?scale=1.0&query=&map=ko04971&use=reference&multi_query=K00907+red%0D%0AK04896+red%0D%0AK13961+red%0D%0AK04515+red%0D%0AK18245+red%0D%0AK04218+blue%0D%0A
ko05418	Fluid shear stress and atherosclerosis	Human Diseases	Cardiovascular diseases	11(4.26%)	143(1.64%)	0.00105524	0.0199792	5	6	http://www.kegg.jp/kegg-bin/show_pathway?scale=1.0&query=&map=ko05418&use=reference&multi_query=K04379+blue%0D%0AK16336+red%0D%0AK02649+blue%0D%0AK04383+blue%0D%0AK03907+red%0D%0AK01365+blue%0D%0AK07198+blue%0D%0AK04359+red%0D%0AK02161+red%0D%0AK05098+red%0D%0AK01398+blue%0D%0A
ko04510	Focal adhesion	Cellular Processes	Cellular community - eukaryotes	13(5.04%)	188(2.15%)	0.00134048	0.0223939	11	2	http://www.kegg.jp/kegg-bin/show_pathway?scale=1.0&query=&map=ko04510&use=reference&multi_query=K00907+red%0D%0AK06484+red%0D%0AK02649+blue%0D%0AK06587+red%0D%0AK06240+red%0D%0AK06485+red%0D%0AK05760+blue%0D%0AK06237+red%0D%0AK04359+red%0D%0AK02161+red%0D%0AK05098+red%0D%0AK06244+red%0D%0AK12755+red%0D%0A
ko05165	Human papillomavirus infection	Human Diseases	Infectious diseases: Viral	18(6.98%)	320(3.67%)	0.00295635	0.0395163	11	7	http://www.kegg.jp/kegg-bin/show_pathway?scale=1.0&query=&map=ko05165&use=reference&multi_query=K06484+red%0D%0AK02649+blue%0D%0AK06587+red%0D%0AK02354+red%0D%0AK01384+blue%0D%0AK06240+red%0D%0AK09091+red%0D%0AK06052+red%0D%0AK06751+red%0D%0AK06485+red%0D%0AK02599+red%0D%0AK05760+blue%0D%0AK06237+red%0D%0AK10691+blue%0D%0AK11987+blue%0D%0AK04237+blue%0D%0AK06244+red%0D%0AK05842+blue%0D%0A
ko01521	EGFR tyrosine kinase inhibitor resistance	Human Diseases	Drug resistance: Antineoplastic	9(3.49%)	81(0.93%)	0.000126727	0.00599842	4	5	http://www.kegg.jp/kegg-bin/show_pathway?scale=1.0&query=&map=ko01521&use=reference&multi_query=K08774+red%0D%0AK09408+blue%0D%0AK02649+blue%0D%0AK05455+blue%0D%0AK05405+blue%0D%0AK04359+red%0D%0AK02161+red%0D%0AK05098+red%0D%0AK04692+blue%0D%0A
ko04512	ECM-receptor interaction	Environmental Information Processing	Signaling molecules and interaction	6(2.33%)	72(0.83%)	0.00521299	0.0493496	6	0	http://www.kegg.jp/kegg-bin/show_pathway?scale=1.0&query=&map=ko04512&use=reference&multi_query=K06484+red%0D%0AK06587+red%0D%0AK06240+red%0D%0AK06485+red%0D%0AK06237+red%0D%0AK06244+red%0D%0A
ko04931	Insulin resistance	Human Diseases	Endocrine and metabolic diseases	9(3.49%)	91(1.04%)	0.000334682	0.0105611	2	7	http://www.kegg.jp/kegg-bin/show_pathway?scale=1.0&query=&map=ko04931&use=reference&multi_query=K04373+red%0D%0AK07189+green%0D%0AK08536+blue%0D%0AK02649+blue%0D%0AK07198+blue%0D%0AK05405+blue%0D%0AK04696+blue%0D%0AK04692+blue%0D%0A
ko01522	Endocrine resistance	Human Diseases	Drug resistance: Antineoplastic	7(2.71%)	88(1.01%)	0.00437022	0.0493496	4	3	http://www.kegg.jp/kegg-bin/show_pathway?scale=1.0&query=&map=ko01522&use=reference&multi_query=K04379+blue%0D%0AK02649+blue%0D%0AK18452+red%0D%0AK06052+red%0D%0AK02599+red%0D%0AK02161+red%0D%0AK01398+blue%0D%0A
ko04917	Prolactin signaling pathway	Organismal Systems	Endocrine system	6(2.33%)	66(0.76%)	0.00320026	0.0395163	0	6	http://www.kegg.jp/kegg-bin/show_pathway?scale=1.0&query=&map=ko04917&use=reference&multi_query=K04379+blue%0D%0AK09408+blue%0D%0AK02649+blue%0D%0AK04701+blue%0D%0AK04696+blue%0D%0AK04692+blue%0D%0A
ko05210	Colorectal cancer	Human Diseases	Cancers: Specific types	7(2.71%)	89(1.02%)	0.00468233	0.0493496	3	4	http://www.kegg.jp/kegg-bin/show_pathway?scale=1.0&query=&map=ko05210&use=reference&multi_query=K04379+blue%0D%0AK09782+red%0D%0AK08774+red%0D%0AK02649+blue%0D%0AK10140+blue%0D%0AK04674+blue%0D%0AK02161+red%0D%0A
ko04060	Cytokine-cytokine receptor interaction	Environmental Information Processing	Signaling molecules and interaction	14(5.43%)	241(2.76%)	0.00518987	0.0493496	5	9	http://www.kegg.jp/kegg-bin/show_pathway?scale=1.0&query=&map=ko04060&use=reference&multi_query=K05074+red%0D%0AK05136+blue%0D%0AK05513+blue%0D%0AK04738+blue%0D%0AK04383+blue%0D%0AK05405+blue%0D%0AK04359+red%0D%0AK02583+red%0D%0AK04674+blue%0D%0AK05069+blue%0D%0AK05098+red%0D%0AK05080+red%0D%0AK05079+blue%0D%0AK05423+blue%0D%0A
ko04151	PI3K-Akt signaling pathway	Environmental Information Processing	Signal transduction	28(10.85%)	365(4.18%)	1.03663e-06	0.000147201	19	9	http://www.kegg.jp/kegg-bin/show_pathway?scale=1.0&query=&map=ko04151&use=reference&multi_query=K09782+red%0D%0AK08774+red%0D%0AK09408+blue%0D%0AK18496+red%0D%0AK06484+red%0D%0AK04289+blue%0D%0AK02649+blue%0D%0AK06587+red%0D%0AK04358+red%0D%0AK04275+red%0D%0AK06240+red%0D%0AK03914+red%0D%0AK07198+blue%0D%0AK06485+red%0D%0AK05405+blue%0D%0AK04544+blue%0D%0AK06237+red%0D%0AK04359+red%0D%0AK02583+re…
ko05133	Pertussis	Human Diseases	Infectious diseases: Bacterial	7(2.71%)	70(0.80%)	0.00101197	0.0199792	1	6	http://www.kegg.jp/kegg-bin/show_pathway?scale=1.0&query=&map=ko05133&use=reference&multi_query=K04379+blue%0D%0AK04001+blue%0D%0AK06484+red%0D%0AK04383+blue%0D%0AK05405+blue%0D%0AK12800+blue%0D%0AK05842+blue%0D%0A
ko00254	Aflatoxin biosynthesis	Metabolism	Biosynthesis of other secondary metabolites	1(0.39%)	2(0.02%)	0.000870708	0.0191266	0	1	http://www.kegg.jp/kegg-bin/show_pathway?scale=1.0&query=&map=ko00254&use=reference&multi_query=K11262+blue%0D%0A
